# Supplementary material for: Short Tryptamine-Based Peptoids as Potential Therapeutics for Microbial Keratitis: Structure-Function Correlation Studies
Source: MDPI journal article supplement (doi:10.3390/antibiotics11081074), 2022-08-08

# The Supplementary Data for

## Short tryptamine based peptoids as potential therapeutics for microbial keratitis: Structure-function correlation studies

Ghayah Bahatheg <sup>1,2</sup>, Rajesh Kuppusamy <sup>1,3,\*</sup>, Muhammad Yasir <sup>3</sup>, David StC Black <sup>1</sup>, Mark Willcox <sup>3</sup> and Naresh Kumar <sup>1,\*</sup>

<sup>1</sup> School of Chemistry, The University of New South Wales, , Australia;

<sup>2</sup> Department of Chemistry, Faculty of Science, University of Jeddah, Jeddah, 21589, Saudi Arabia

<sup>3</sup> School of Optometry and Vision Science, The University of New South Wales, UNSW Sydney, NSW 2052, Australia

### Table of Contents

|                                                                                                                                    |      |
|------------------------------------------------------------------------------------------------------------------------------------|------|
| 1. Design and synthesis of the main scaffolds and their <sup>1</sup> HNMR and <sup>13</sup> C NMR data.....                        | S2   |
| 2. Attempted reaction <i>N,N</i> -Dimethylglycine hydrochloride with compound 8 and 9.....                                         | S4   |
| 3. TFA salts peaks.....                                                                                                            | S6   |
| 4. VT <sup>1</sup> HNMR spectra of compounds 12a,13a,14a and 15a.....                                                              | S7   |
| 5. The calculations of the free energy barriers between the two unequal populated isomers of CH <sub>2</sub> -naphthyl (12a) ..... | S11  |
| 6. <sup>1</sup> H and <sup>13</sup> CNMR spectra of the main scaffolds naphthyl, phenyl, and indole secondary amines.....          | S12  |
| 7. <sup>1</sup> H, and <sup>13</sup> CNMR of Boc-naphthyl-indole and naphthyl-phenyl based peptoids.....                           | S18  |
| 8. <sup>1</sup> H, and <sup>13</sup> CNMR of mono-amine naphthyl-indole and naphthyl-phenyl based peptoids.                        | S38  |
| 9. <sup>1</sup> H, and <sup>13</sup> CNMR of diamino-naphthyl- indole based peptoids.....                                          | S52  |
| 10. <sup>1</sup> H, and <sup>13</sup> CNMR of mono-guanidine naphthyl-indole and naphthyl-phenyl based peptoids.....               | S58  |
| 11. <sup>1</sup> H, and <sup>13</sup> CNMR of di-guanidine-naphthyl- indole based peptoids.....                                    | S70  |
| 12. <sup>1</sup> H, and <sup>13</sup> CNMR of dimethyl- naphthyl-indole and naphthyl-phenyl based peptoids.....                    | S76  |
| 13. <sup>1</sup> H, and <sup>13</sup> CNMR of tertiary ammonium hydrochloride salts peptoids.....                                  | S84  |
| 14. <sup>1</sup> H, and <sup>13</sup> CNMR of quaternary ammonium iodide salts peptoids.....                                       | S92  |
| 15. Expanded <sup>1</sup> HNMR spectra for some regions not clear in the full <sup>1</sup> HNMR spectra.....                       | S100 |
| 16. HRMS data.....                                                                                                                 | S112 |

## 1- Design and synthesis of the main scaffolds:

The indole ring in tryptophan is known to prefer the interfacial regions of the cell lipid membrane, hence the indole motif is incorporated into the peptides to increase their cell permeability [16]. Thus, the core basic scaffolds were synthesized contain both naphthyl and indole rings. The naphthyl ring increases the hydrophobicity of the compounds, while the indole ring promotes membrane permeability. Furthermore, cationic amino acids were used to increase the electrostatic interaction between antibacterial peptoids and cell membranes. The initial core scaffolds were synthesized via a reductive amination reaction between aldehyde **6** bearing a naphthyl group and amine **7** bearing an indole or phenyl group, to produce the aromatic secondary amine scaffolds **8** and **9**, using an established procedure [48]. Phenyl rings were also investigated in place of naphthyl to investigate the importance of these groups on biological activity, giving scaffolds **12a**, **12d** and **26** (Scheme S1).  $\alpha$ -Gly-peptoids **12a**, **12b** and **26** were tested against Gram-positive and Gram-negative bacteria. Compound **12a** which contains indole and naphthyl has shown the best activity against *S. aureus* and *E. coli* K12 among the three initial peptoids (see Table S1 for MIC values). These results encouraged us to focus on scaffold **12a** to create most active peptoids.

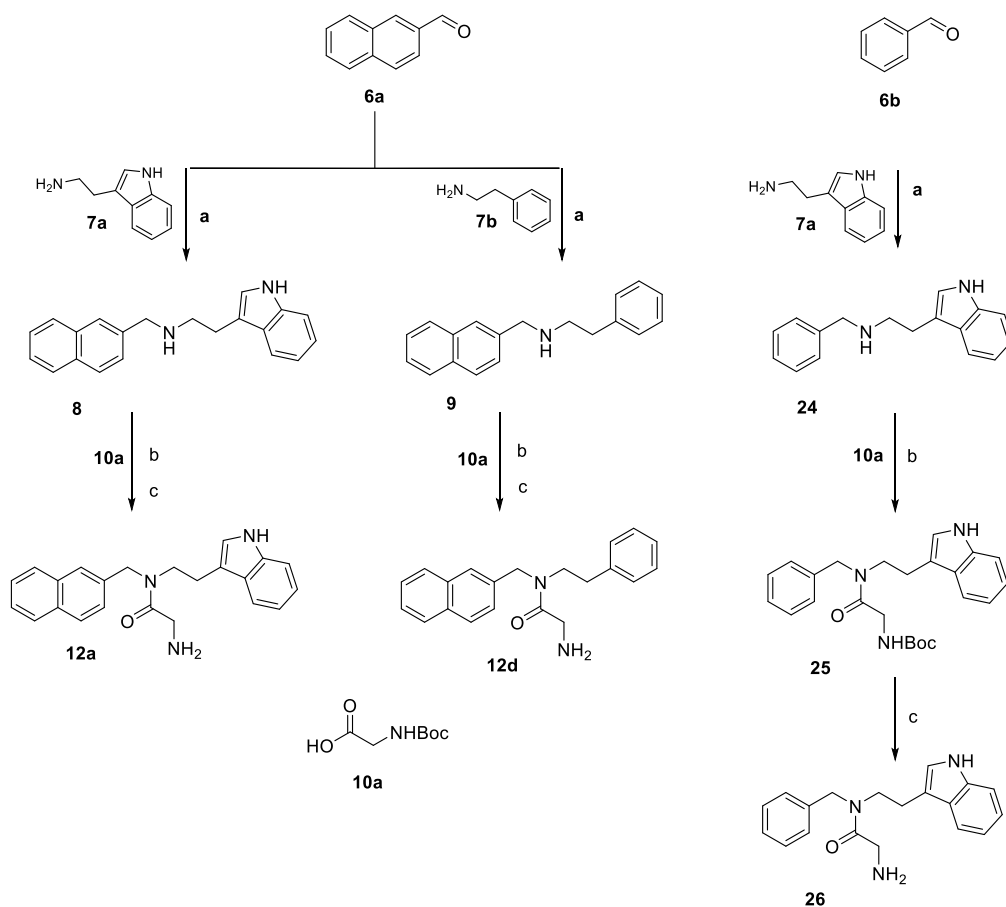

**Scheme S1.** General procedure for the synthesis of main scaffolds via reductive amination. **a)** 7a or 7b (1.0 equiv), TMOF, rt, 1.5h, AcOH, NaCNBH<sub>3</sub> (0.3 equiv) 20 mins rt. **b)** 10a (1.0-2.0 equiv), coupling reagent (HATU 1.1equiv), or (HBTU 2.0 equiv), DIPEA (3.0 equiv), DMF, rt, 2-3 hrs. **c)** DCM (1-3 mL), TFA (1-3 mL). rt, 1-3 hrs.

**Table S1.** The initial MIC results of the first compounds.

| ID  | MIC of SA38 (μM) | MIC of E. coli k12 (μM) |
|-----|------------------|-------------------------|
| 12a | 21.8             | 125                     |
| 12d | 125              | > 125                   |
| 26  | > 125            | > 250                   |

**General procedure A for the synthesis of compounds (8-9-24) via reductive amination.**

Tryptamine or phenylethylamine (1 equiv) and 2-naphthaldehyde or benzaldehyde (1 equiv) in trimethyl orthoformate (40 mL) was stirred for 1h at rt under an argon atmosphere. After 1h AcOH (1.6 ml) and NaCNBH<sub>3</sub> (0.3 equiv) was added to the reaction mixture, stirring was continued for 20 mins. After completion of the reaction NaOH 1N was added to the mixture. The reaction mixture was extracted with ethyl acetate (350ml) and then it was dried over NaSO<sub>4</sub>. Then it was filtered and evaporated solvent in vacuo. The crude products were purified by flash chromatography using CHCl<sub>3</sub>/MeOH 10 % or EtOAc/Hexane. The pure compound was dried under vacuum to give a solid product.

**<sup>1</sup>H NMR and <sup>13</sup>C NMR spectra of 2-(1*H*-indol-3-yl)-*N*-(naphthalen-2-ylmethyl)ethan-1-amine (8).** The compound (8) was prepared from tryptamine (12 mmol, 2g) and 2-naphthaldehyde (12 mmol, 1.87 g) according to the general procedure A. The product 8 was obtained as yellowish solid product (1.838 g, 50%); mp 97.7-99.8 °C; **<sup>1</sup>H NMR** (400 MHz, DMSO) δ 10.76 (s, 1H), 7.90 – 7.76 (m, 3H), 7.80 – 7.77 (m, 1H), 7.55 – 7.41 (m, 4H), 7.32 (dt, *J* = 8.1, 1.0 Hz, 1H), 7.13 (d, *J* = 2.3 Hz, 1H), 7.04 (ddd, *J* = 8.1, 6.9, 1.2 Hz, 1H), 6.93 (ddd, *J* = 7.9, 7.0, 1.0 Hz, 1H), 3.91 (s, 2H), 2.93 – 2.79 (m, 4H), 2.26 (s, 1H); **<sup>13</sup>C NMR** (101 MHz, DMSO) δ 138.7, 136.2, 132.9, 132.0, 127.5, 127.4, 127.2, 126.7, 125.9, 125.8, 125.3, 122.5, 120.7, 118.3, 118.0, 112.6, 111.3, 52.9, 49.5, 25.5. ; **IR (ATR):** ν<sub>max</sub> 3414, 3295, 3049, 2897, 2753, 1425, 1338, 1226, 1096, 997, 813, 737; **HRMS (ESI):** *m/z* calcd for C<sub>21</sub>H<sub>20</sub>N<sub>2</sub> [M]<sup>+</sup>: 301.1699; found: 301.1697

**<sup>1</sup>H NMR and <sup>13</sup>C NMR spectra of *N*-(naphthalen-2-ylmethyl)-2-phenylethan-1-amine (9).** The compound (9) was obtained from phenylethylamine (28 mmol, 3.54mL) of and 2-naphthaldehyde (20 mmol, 4g) according to the general procedure A. The product 9 was obtained as a yellowish solid. (2.37 g, 35%); mp 41.3- 42.7 °C; **<sup>1</sup>H NMR** (400 MHz, DMSO) δ 7.91 – 7.80 (m, 3H), 7.78 (d, *J* = 1.6 Hz, 1H), 7.53 – 7.42 (m, 3H), 7.27 7.18 (m, 5H), 3.89 (d, *J* = 0.9 Hz, 2H), 2.77 (s, 4H); **<sup>13</sup>C NMR** (101 MHz, DMSO) δ 140.5, 138.5, 132.9, 132.0, 128.5, 128.4, 128.3, 128.2, 127.5, 127.4, 126.7, 125.93, 125.8, 125.7, 125.3, 52.9, 50.4, 35.8; **IR (ATR):** ν<sub>max</sub> 3022, 2823, 2401, 2115, 1939, 1598, 1442, 1327, 1105, 1013, 897, 821, 739; **HRMS (ESI):** *m/z* calcd for C<sub>19</sub>H<sub>19</sub>N [M]<sup>+</sup>: 262.1590; found: 262.1589.

**<sup>1</sup>H NMR and <sup>13</sup>C NMR spectra of *N*-benzyl-2-(1*H*-indol-3-yl) ethan-1-amine (24).** The compound (24) was obtained from Tryptamine (12 mmol, 2g) of and benzaldehyde (12 mmol, 1.3mL) according to the general procedure A. The product **24** was obtained as a light brown gum, (0.27g, 84%); **<sup>1</sup>H NMR** (600 MHz, DMSO)  $\delta$  10.77 (s, 1H), 7.49 (d,  $J$  = 7.9 Hz, 1H), 7.36 – 7.28 (m, 5H), 7.27 – 7.18 (m, 1H), 7.13 (d,  $J$  = 2.3 Hz, 1H), 7.09 – 7.02 (m, 1H), 6.96 (td,  $J$  = 7.4, 6.9, 1.0 Hz, 1H), 4.11 (s, 1H), 3.77 (s, 2H), 2.91 – 2.78 (m, 4H); **<sup>13</sup>C NMR** (151 MHz, DMSO)  $\delta$  140.4, 136.2, 128.12, 128.1, 128.0, 127.2, 126.6, 122.5, 120.8, 118.2, 118.1, 112.4, 111.3, 52.7, 49.4, 25.2; **IR (ATR):**  $\nu_{\text{max}}$  3409, 3054, 2915, 2837, 2102, 1600, 1452, 1338, 1227, 1092, 803; **HRMS (ESI):**  $m/z$  calcd for C<sub>17</sub>H<sub>18</sub>N<sub>2</sub> [M]<sup>+</sup>: 251.1542; found: 251.1541.

**<sup>1</sup>H NMR and <sup>13</sup>C NMR spectra of *Tert*-butyl(2-((2-(1*H*-indol-3-yl)ethyl)(benzyl)amino)-2-oxoethyl)carbamate (25).** The title compound **25** was prepared via protocol C using compound **24** (0.22 g, 0.1 mmol) and Boc-Gly-OH (0.175 g, 0.1 mmol) to give a brown solid (0.309 g, 76%); mp 57.6-58.9 °C; **<sup>1</sup>H NMR** (600 MHz, DMSO)  $\delta$  10.83 (d, NH-indole, 1H), 7.49 (t, ArH, 1H), 7.41 – 7.23 (m, ArH 6H), 7.14 (dd, ArH, 1H), 7.10 – 7.03 (m, ArH 1H), 7.01 – 6.92 (m, ArH, 1H), 6.82 (q, ArH, 1H), 4.57 (d, Ar-CH<sup>1</sup>H<sup>2</sup>-N-2CH<sub>2</sub>-(indole)Boc-Gly, 2H), 3.85 (dd,  $\alpha$ -CH<sup>1</sup>H<sup>2</sup> of Boc-Gly, 2H), 3.51 – 3.44 (m, Ar-CH<sub>2</sub>-N-CH<sub>2</sub>-CH<sub>2</sub>-indole, 2H), 2.98 – 2.82 (m, Ar-CH<sub>2</sub>-N-CH<sub>2</sub>-CH<sub>2</sub>-indole, 2H), 1.40 (d, (CH<sub>3</sub>)<sub>3</sub> of Boc- Gly, 9H); **<sup>13</sup>C NMR** (151 MHz, DMSO)  $\delta$  169.0, 168.8, 155.9, 155.8, 138.0, 137.4, 136.2, 136.1, 128.6, 128.3, 127.5, 127.2, 127.0, 126.99, 126.9, 126.7, 126.6, 123.1, 122.6, 121.0, 120.9, 118.3, 118.2, 118.0, 111.4, 111.37, 111.3, 110.6, 78.1, 77.9, 77.8, 60.2, 49.7, 48.0, 47.0, 46.9, 41.9, 41.3, 38.2, 28.2, 27.9, 23.9, 23.1; **IR (ATR):**  $\nu_{\text{max}}$  3297, 3056, 2973, 2339, 2105, 1694, 1641, 1529, 1451, 1364, 1159, 1051, 947, 864, 736; **HRMS (ESI):**  $m/z$  calcd for C<sub>24</sub>H<sub>29</sub>N<sub>3</sub>O<sub>3</sub> [M + Na]<sup>+</sup>: 430.2101; found: 430.2102.

**<sup>1</sup>H NMR and <sup>13</sup>C NMR spectra of *N*-(2-(1*H*-indol-3-yl) ethyl)-2-amino-*N*-benzylacetamide (26) (TFA salt).** The title compound **26** was synthesized from compound **25** (0.189 g, 0.42 mmol) according to the protocol E. The product **26** was obtained as light brown solid (0.09 g, 60%) mp 149.1-150.8 °C; **<sup>1</sup>H NMR** (600 MHz, DMSO)  $\delta$  11.17 – 10.68 (m, NH-indole, 1H), 7.91 (s, <sup>+</sup>NH<sub>3</sub>CF<sub>3</sub>COO<sup>-</sup>, 3H), 7.52 (dd, ArH, 1H), 7.41 (t, ArH, 1H), 7.38 – 7.26 (m, ArH, 5H), 7.14 (dd, ArH, 1H), 7.11 – 7.04 (m, ArH, 1H), 6.98 (m, ArH, 1H), 4.62 (d, Ar-CH<sup>1</sup>H<sup>2</sup>-N-2CH<sub>2</sub>-indole (Gly), 2H), 3.86 (d,  $\alpha$ -CH<sup>1</sup>H<sup>2</sup> of Gly, 2H), 3.71 – 3.42 (m, Ar-CH<sub>2</sub>-N-CH<sup>1</sup>H<sup>2</sup>-CH<sub>2</sub>- indole (Gly), 2H), 2.93 (m, Ar-CH<sub>2</sub>-N-CH<sub>2</sub>-CH<sup>1</sup>H<sup>2</sup>-indole, 2H); **<sup>13</sup>C NMR** (151 MHz, DMSO)  $\delta$  166.3, 137.3, 136.6, 136.2, 136.1, 128.7, 128.4, 127.7, 127.6, 127.2, 127.0, 126.8, 123.3, 122.7, 121.1, 121.0, 118.4, 118.3, 118.14, 118.1, 111.5, 111.4, 110.9, 110.4, 49.8, 47.8, 46.9, 46.9, 23.4, 23.0; **IR (ATR):**  $\nu_{\text{max}}$  3313, 3057, 2961, 2321, 2106, 1778, 1638, 1576, 1492, 1359, 1188, 1119, 1016, 915, 799, 737; **HRMS (ESI):**  $m/z$  calcd for C<sub>19</sub>H<sub>21</sub>N<sub>3</sub>O [M]<sup>+</sup>: 308.1757; found: 308.1757.

## 2- Attempted reaction *N,N*-Dimethylglycine hydrochloride with 2-(1*H*-indol-3-yl)-*N*-(naphthalen-2-ylmethyl)ethan-1-amine or *N*-(naphthalen-2-ylmethyl)-2-phenylethan-1-amine.

The reaction of *N,N*-Dimethylglycine hydrochloride with naphthyl-indole  $\alpha$ -amin and naphthyl-phenyl  $\alpha$ -amine as shown in Scheme S2 protocol a was used a synthetic route to produce dimethyl amino-propane peptoids. Unlike the reaction with 3-(Dimethyl- amino) propionic acid hydrochloride



or 4-(Dimethyl -amino)butyric acid hydro- chloride, the reaction with *N,N*-Dimethylglycine hydrochloride was unsuccessful.

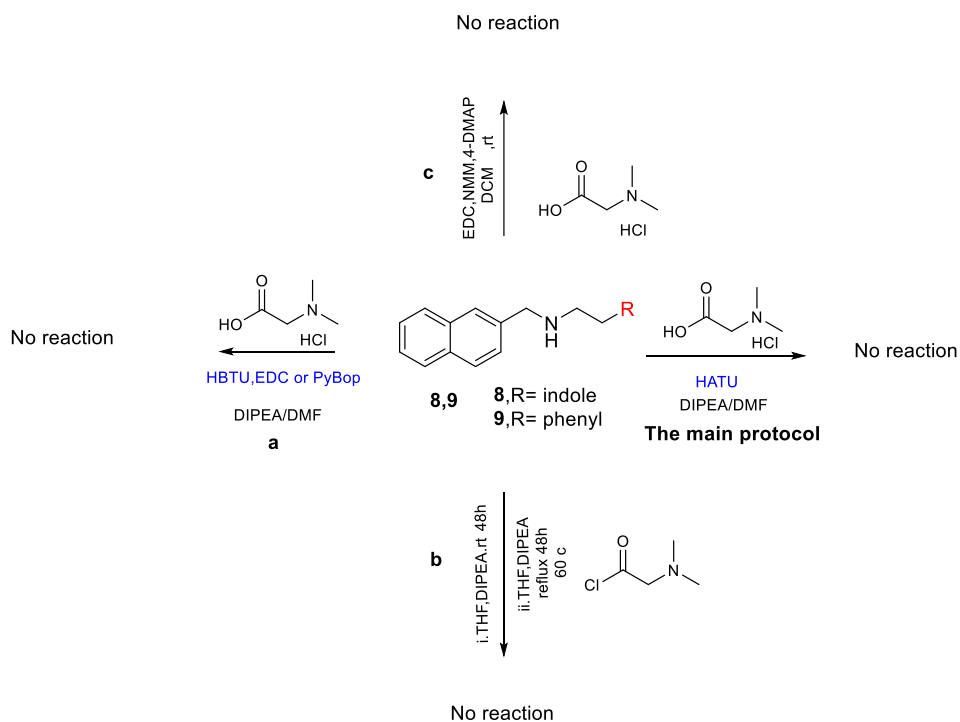

**Scheme S2.** Attempted reactions to prepare (dimethylamino)propane peptoids.

As a result of this negative reaction according to protocol a, several routes and conditions were investigated.

a- The utilization of varying coupling reagents such as HBTU, EDC, and ByBop Scheme S2

The general procedure:

The amine compound A,B (1 equiv), *N,N*-Dimethylglycine hydrochloride (1.1 equiv), and coupling reagent (1.1 equiv) ( EDC 2.5 equiv) were dissolved in DMF (15mL) by stirring at rt. Then DIPEA (3.0 equiv) was added to the reaction portion-wise. The reaction was stirred at rt under an argon atmosphere for 48h. The reaction was under TLC monitoring; after 48h, there was no new spot on the TLC plate except the starting material's spot.

b- The conversion of *N,N*-dimethylglycine hydrochloride into *N,N*-dimethylglycinol chloride, In an attempt to activate the reaction, *N,N*-dimethylglycinol chloride was reacted with compound A or B as shown in in Scheme S2 rout b. There was no reaction under these conditions. For this reason, reaction b in Scheme S2 was subjected to reflux under 60 C° for 48 hrs, but no result was obtained.

c- The reaction between primary scaffold 8 or 9 and *N,N*-dimethylglycine hydrochloride as shown in Scheme S2 rout c was also not working.

### 3- TFA salts peaks in $^{13}\text{C}$ NMR

Amino and guanidinium peptoids NMR spectra show the TFA salt peaks ( $^+\text{NH}_2\text{CF}_3\text{COO}^-$ ) For amino peptoids **12a-d**, **20a-b** and **22** ( $^+\text{NH}_2\text{CF}_3\text{COO}^-$ ) peaks was clear in  $^1\text{H}$ NMR, they appeared as a single or multiple peaks after ArH-peaks and in  $^{13}\text{C}$ NMR between 157 and 158 ppm. For guanidinium peptoids also we noticed TFA salt peaks at 157 and 158 in  $^{13}\text{C}$  NMR.

To prove if the peaks in NMR belong to ( $^+\text{NH}_2\text{CF}_3\text{COO}^-$ ) or not we used Lysine and dissolved it in TFA for 10 mins then dry it after that we subjected the product to  $^{13}\text{C}$ NMR.  $^{13}\text{C}$ NMR for Lysine TFA salt shows the same peak at 157-158 similar to the  $^{13}\text{C}$ NMR spectra of amine and guanidine's peptoids in this work. Figure S1 and S2.

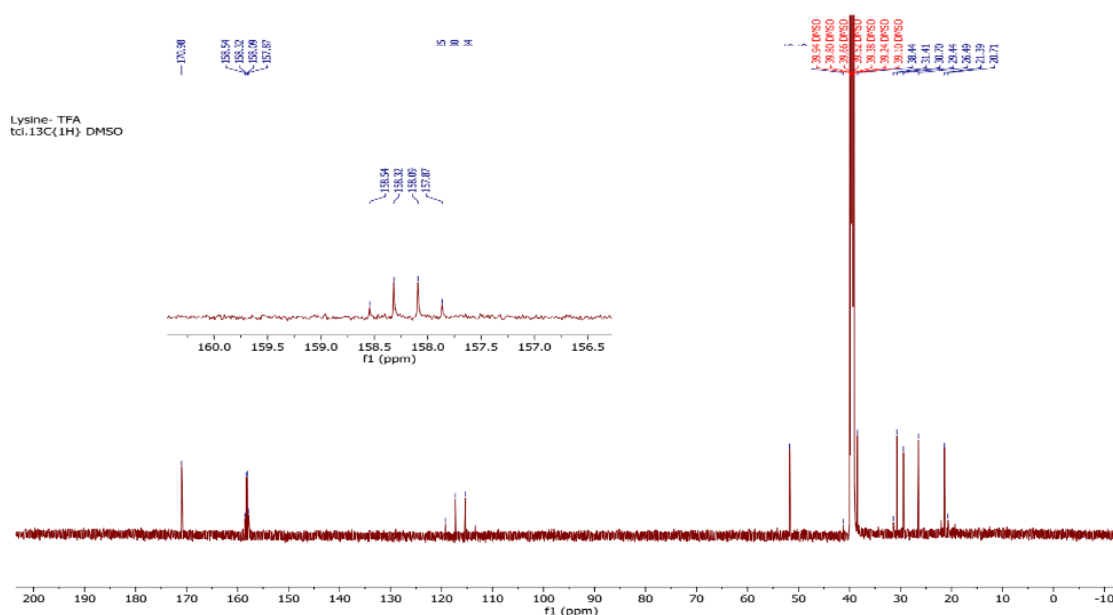

4- VT  $^1\text{H}$ NMR spectra of compounds 12a,13a,14a and 15a:

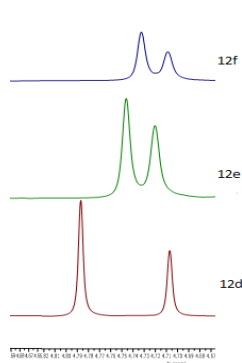

Figure S3. The chemical shift between  $\text{CH}_2$ -naphthyl doublet signals in  $^1\text{H}$ NMR spectra in  $\text{DMSO-d}_6$  at 289 K compounds 12d-12f

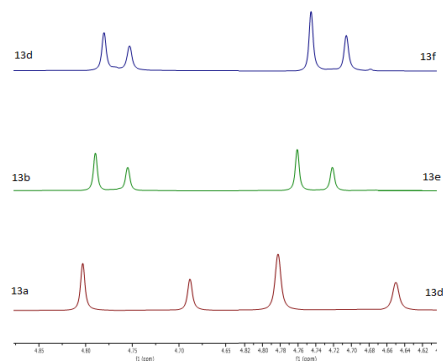

Figure S4. The chemical shift between  $\text{CH}_2$ -naphthyl doublet signals in  $^1\text{H}$ NMR spectra in  $\text{DMSO-d}_6$  at 289 K compounds 13a-13f

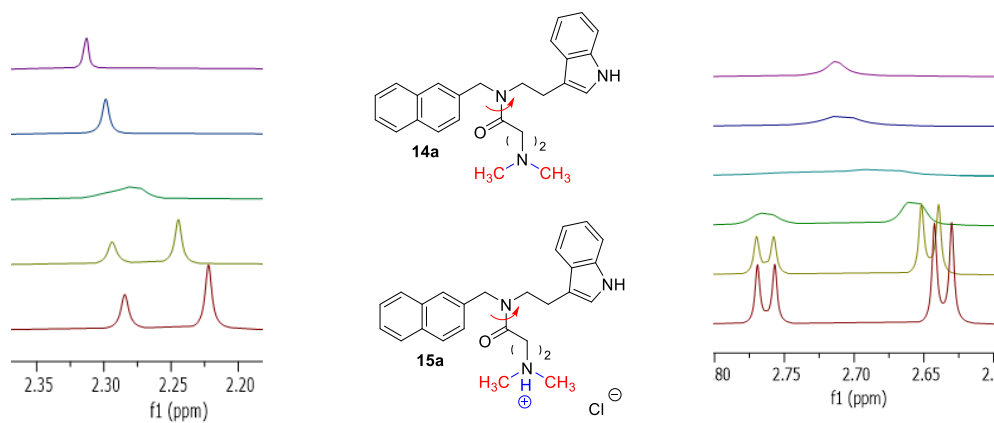

Figure S5.  $^1\text{H}$ NMR spectra of 14a (left) and 15a (right) over 298-383 K in  $\text{DMSO-d}_6$ , (-N-dimethyl region)

The reaction between compound **14a** and HCl produced the tertiary ammonium hydrochloride salt compound **15a** and its VT  $^1\text{H}$ NMR is shown in Figure S5. In DMSO- $d_6$  at 298K, the two  $\text{CH}_3$  groups of the tertiary amide **15a** showed dd signals. In contrast, the same two  $\text{CH}_3$  groups in compound **14a** before the reaction with HCl showed double signals. These outcomes can be explained based on the HCl proton attached to the tertiary amide nitrogen atom (compound **15a**) which affected the splitting of each  $\text{CH}_3$  group in the two isomers to appear as two double peaks, as shown in (Figure S5).

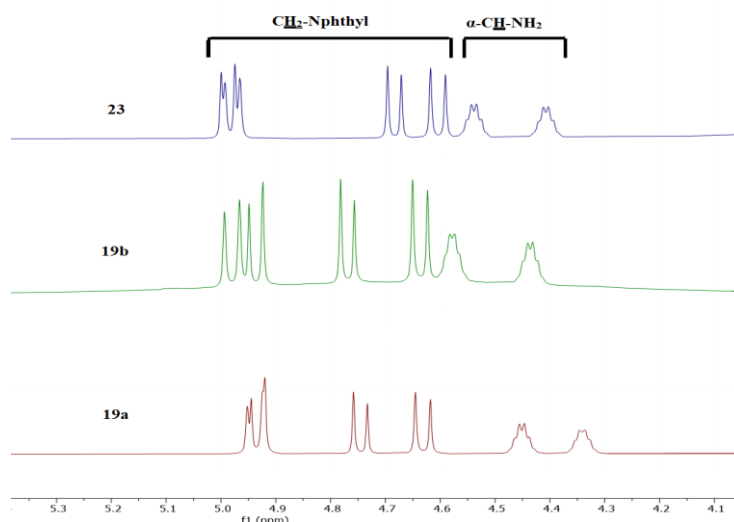

Figure S6.  $\text{CH}_2\text{-Nphthyl}$  and  $\alpha\text{-CH-NH}_2$  region in compounds **19a**, **19b** and **23** in DMSO- $d_6$  at 289 K compounds.

Figure S6. shows the splitting of  $\text{CH}_2\text{-Nph}$  peaks of compounds **19a**, **19b**, and **23** which contain  $\text{NH}_2$  group attached to  $\alpha$ -carbon and how these peaks are affected by the isomerization and the presence of amino group on alpha position. It is clear that the first proton from the left appears as dd and the chemical shift between dd signals is not huge while the second proton splitting in dd peaks with a huge chemical shift difference between the two double signals.

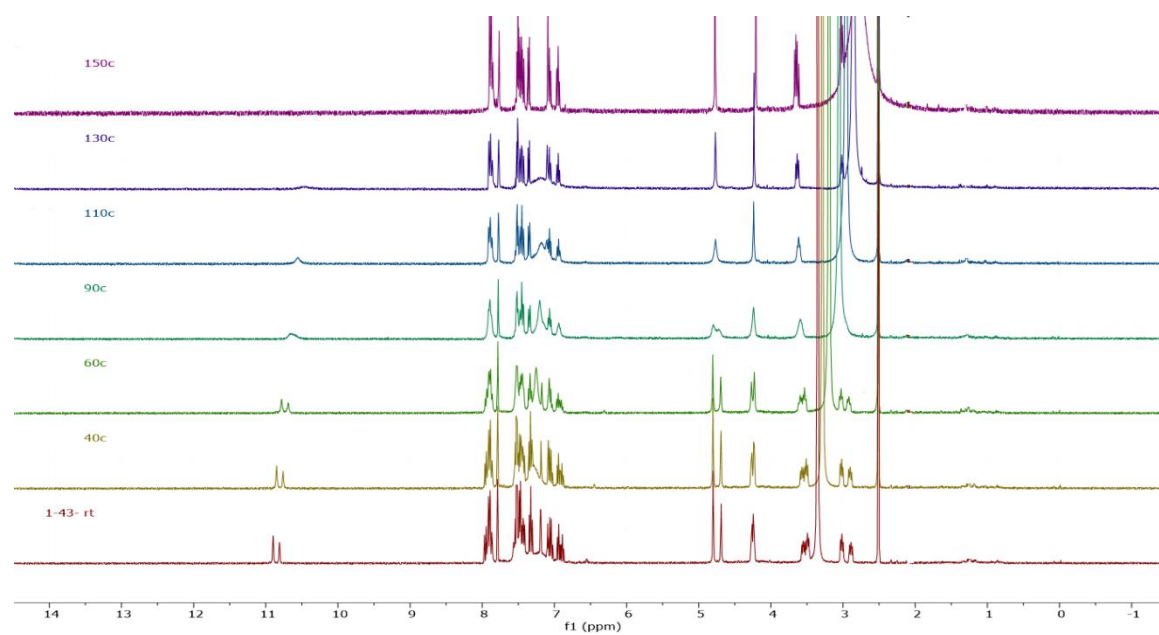

Figure S7. The  $^1\text{H}$  NMR spectra of compounds 13a at variable temperatures in  $\text{DMSO}-d_6$ .

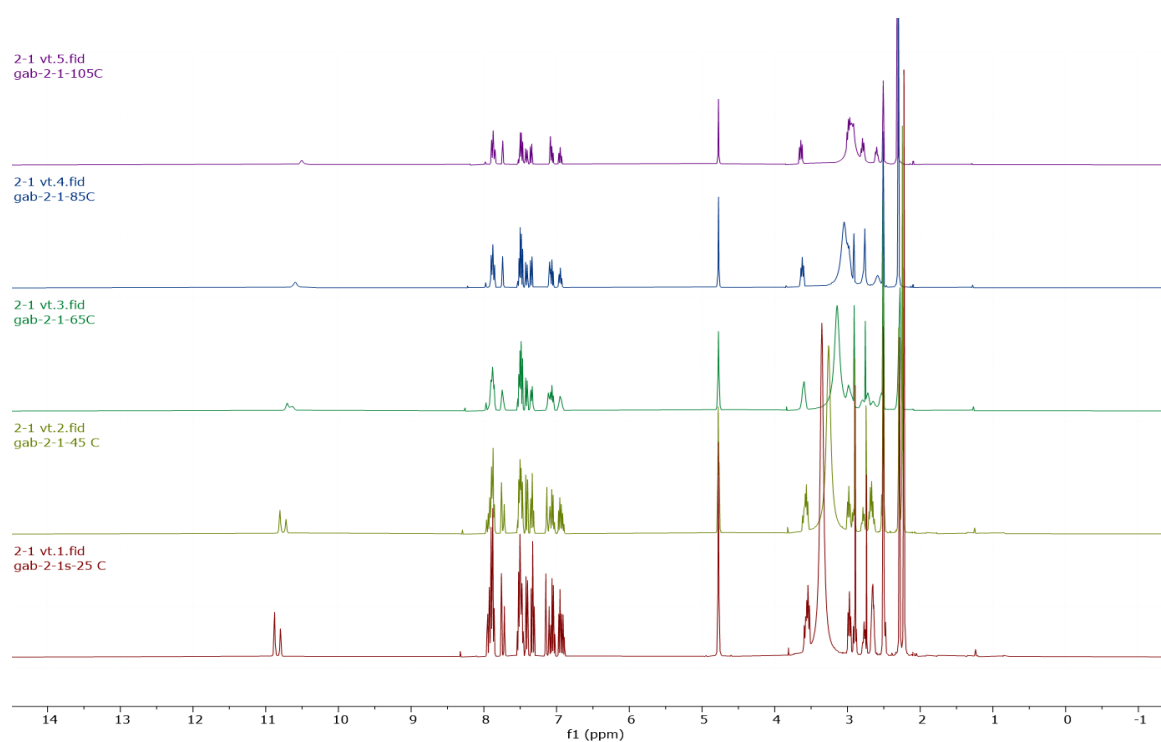

Figure S8. The  $^1\text{H}$  NMR spectra of compounds 13a at variable temperatures in  $\text{DMSO}-d_6$ .

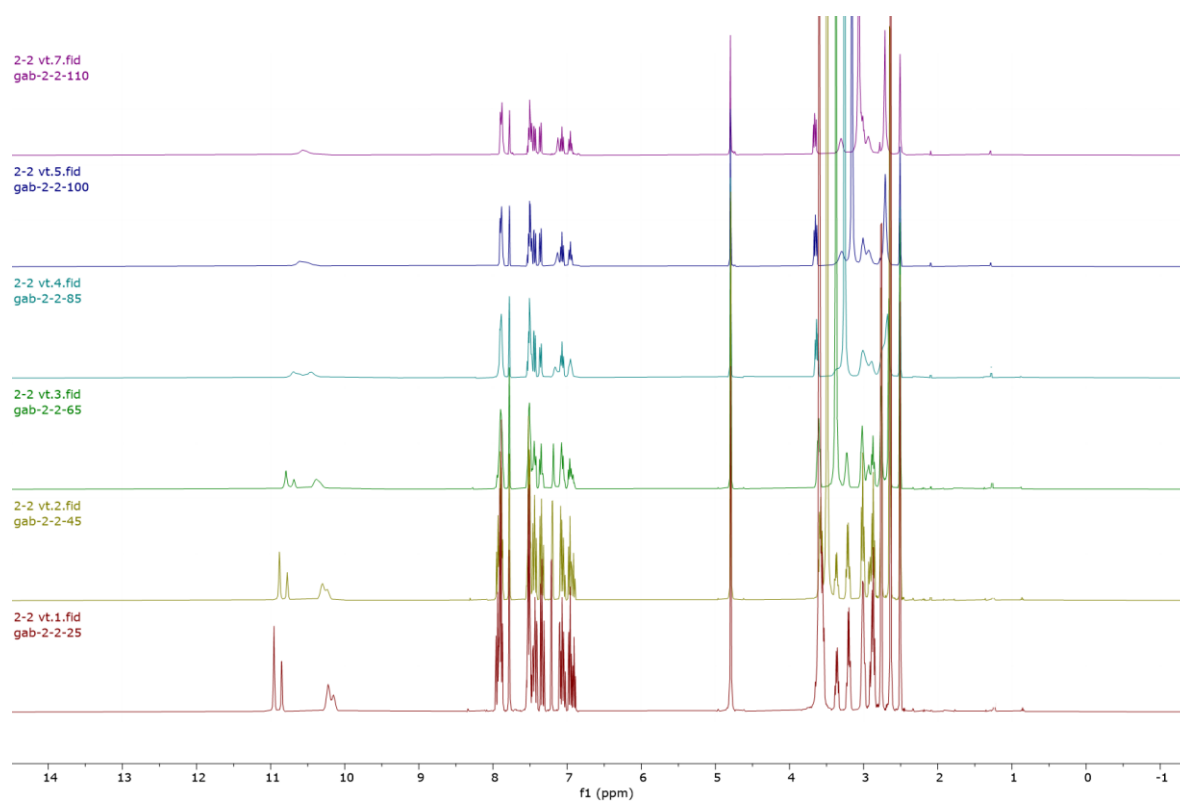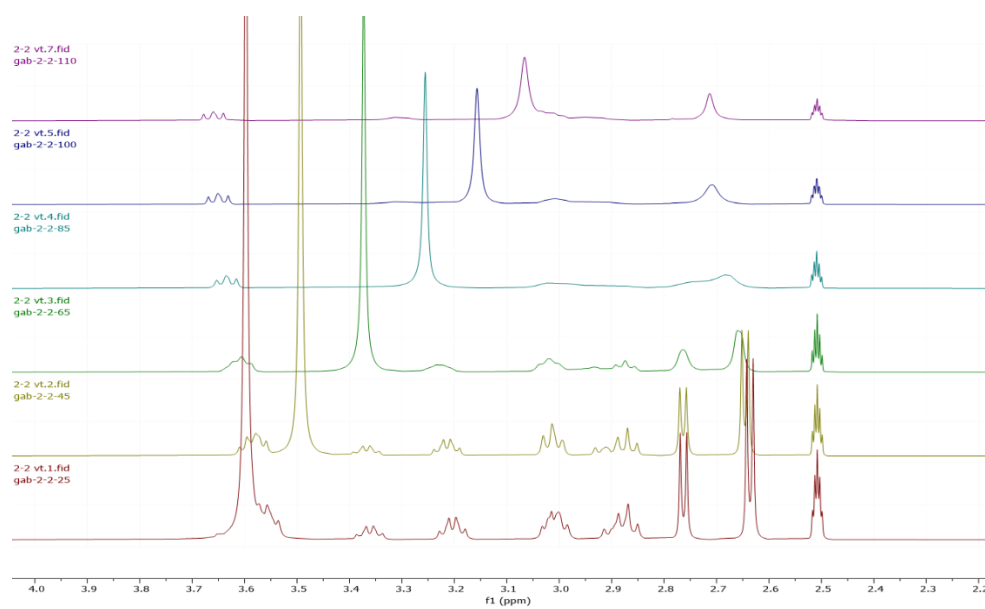

Figure S9. The  $^1\text{H}$  NMR spectra of compounds 15a at variable temperatures in  $\text{DMSO-d}_6$ .

## 5- The calculations of the free energy barriers between the two unequal populated isomers of CH<sub>2</sub>-naphthyl

The energy barriers between two unequal isomers in compound **12a** depending on the CH<sub>2</sub>-naphthyl double signals can be obtained from Eyring's equations (1 and 2) as modified by Shanan-Atidi and Bar-Eli [56,57].

$$\Delta G^\ddagger = 4.57T_c \{10.62 + \log [X/2\pi (1 - \Delta P)] + \log (T_c / \Delta \nu)\} \quad (1)$$

$$\Delta G^\ddagger = 4.57T_c \{10.62 + \log [X/2\pi (1 + \Delta P)] + \log (T_c / \Delta \nu)\} \quad (2)$$

T<sub>c</sub> refers to the coalescence temperature, and Δν is the frequency difference between isomers M and m. Δν = V<sub>M</sub> - V<sub>m</sub> is obtained using equation (3).

$$\Delta \nu = V_m - V_{TMS} / V_{NMR} * 10^6_{ppm} \quad (3)$$

P<sub>M</sub> and P<sub>m</sub> mean the ratio of the rotamers; M and m (P<sub>A</sub> > P<sub>B</sub>, P<sub>A</sub> + P<sub>B</sub> = 1). X is calculated using equation (4) depending on the ΔP value.

$$P_A - P_B = \Delta P = [(X^2 - 2)/3]^{3/2} * 1/X \quad (4)$$

$$\Delta P = (1.3 - 1)/2.3 = [(X^2 - 2)/3]^{3/2} * 1/X, \quad X = 1.551$$

The <sup>1</sup>H NMR experiment at variable temperature found that the coalescence temperature, T<sub>c</sub>, was 383 K. The frequency difference (Δν) of the major and minor isomers was obtained from <sup>1</sup>H NMR spectra at 298 K, and it was 32 Hz.

By the substitution of values of the variables in equation 1 and 2 we calculated the free energy of activation of the two isomers.

$$\Delta G^\ddagger_A = 4.57 * 383 * \{10.62 + \log [1.551/2\pi (1 - 0.1304)] + \log (383/32)\} = 19157 \text{ cal/mol}$$

$$(1 \text{ cal mol}^{-1} = 4.184 \text{ J mol}^{-1})$$

$$\Delta G^\ddagger_A = \mathbf{80.152 \text{ KJ/mol}}$$

$$\Delta G^\ddagger_B = 4.57 T_c \{10.62 + \log [1.551/2\pi (1 + 0.1304)] + \log (383/32)\} = 19318 \text{ cal/mol}$$

$$\Delta G^\ddagger_B = \mathbf{80.826 \text{ KJ/mol} = \sim 81 \text{ KJ/mol}}$$

6-  $^1\text{H}$  and  $^{13}\text{C}$  NMR spectra of the main scaffolds naphthyl, phenyl and indole secondary amines

1. (Compound 8-  $^1\text{H}$  NMR)

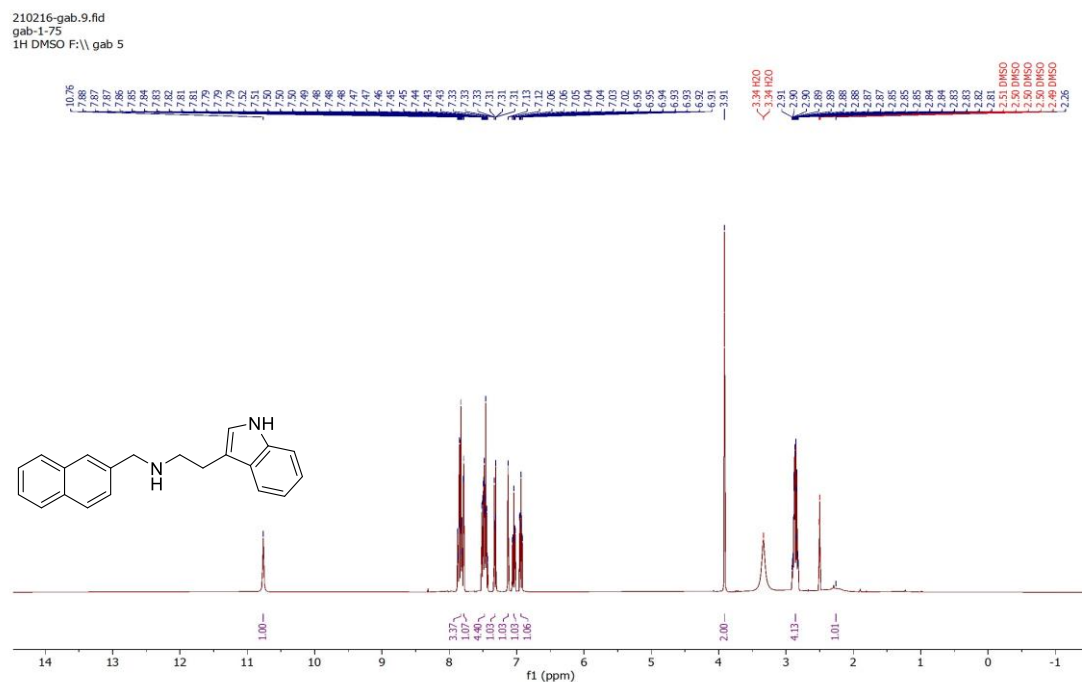

2. (Compound 8-  $^{13}\text{C}$  NMR)

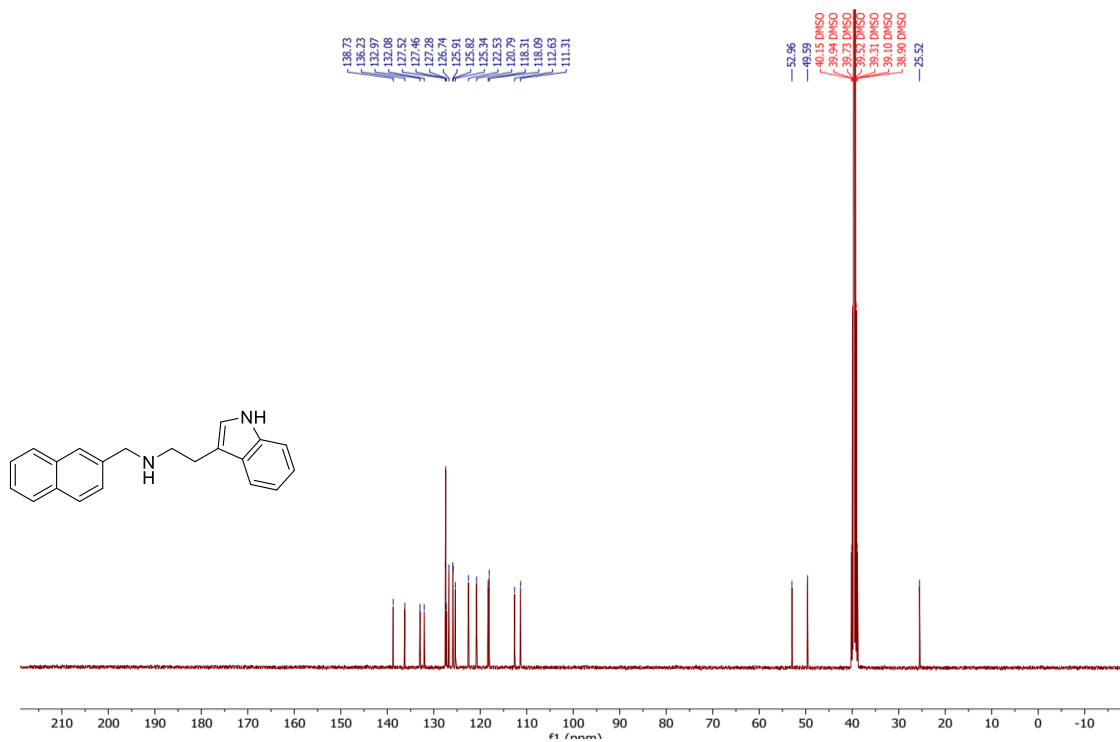



3. (Compound **8**  $^{-13}\text{C}$ NMR-dept 135)

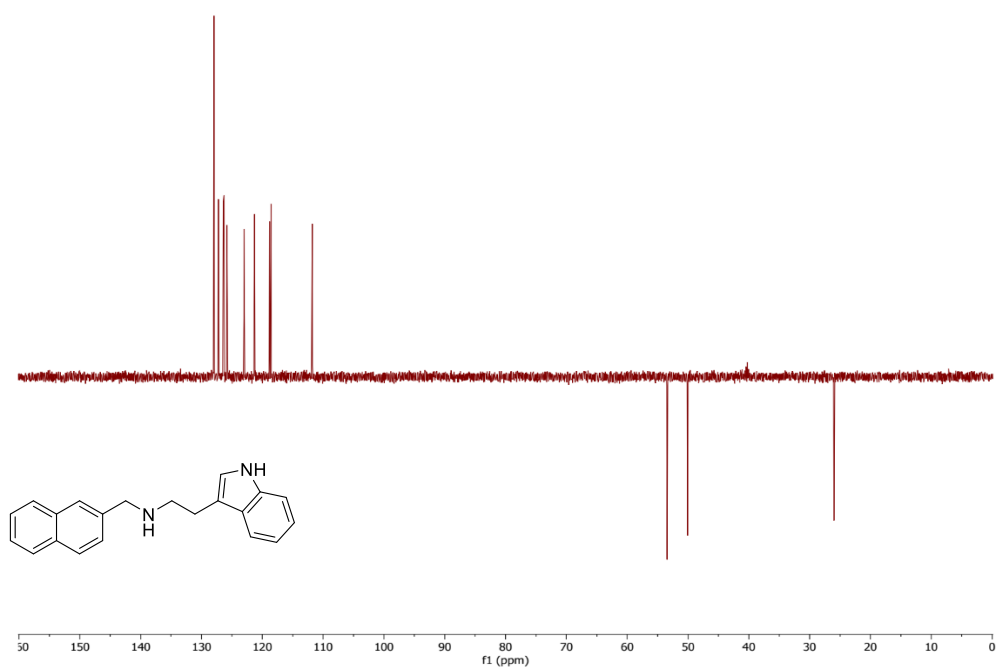

4. (Compound **8**-HSQC)

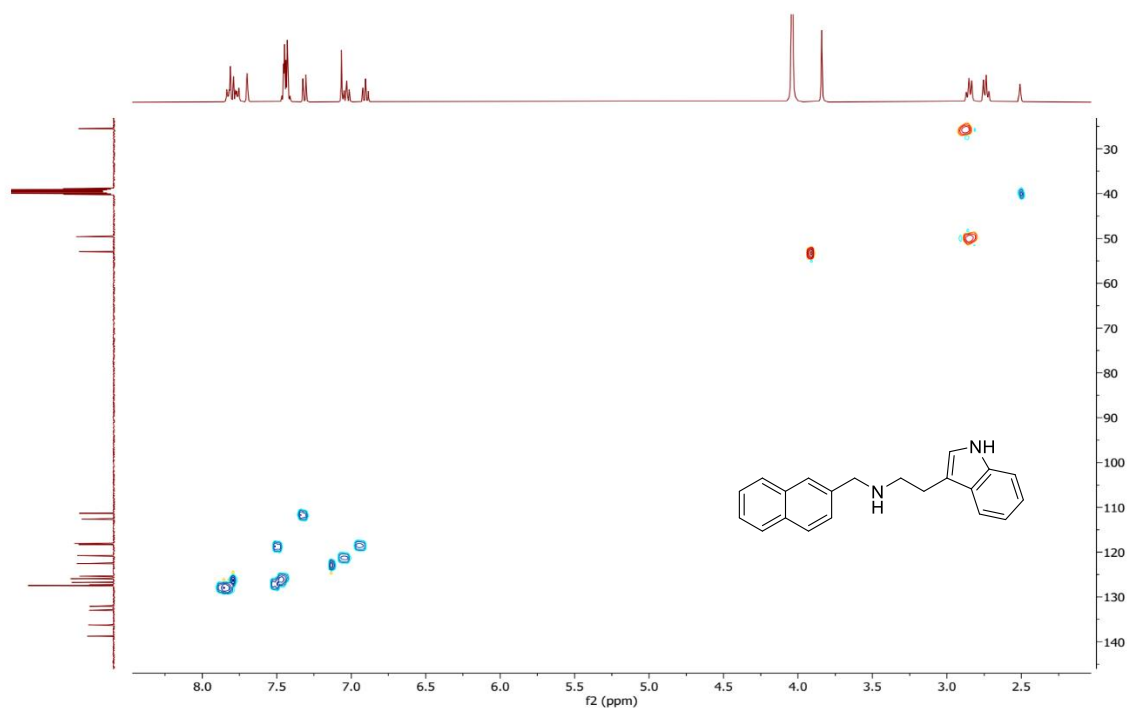

### 5. (Compound **9**- $^1\text{H}$ NMR)

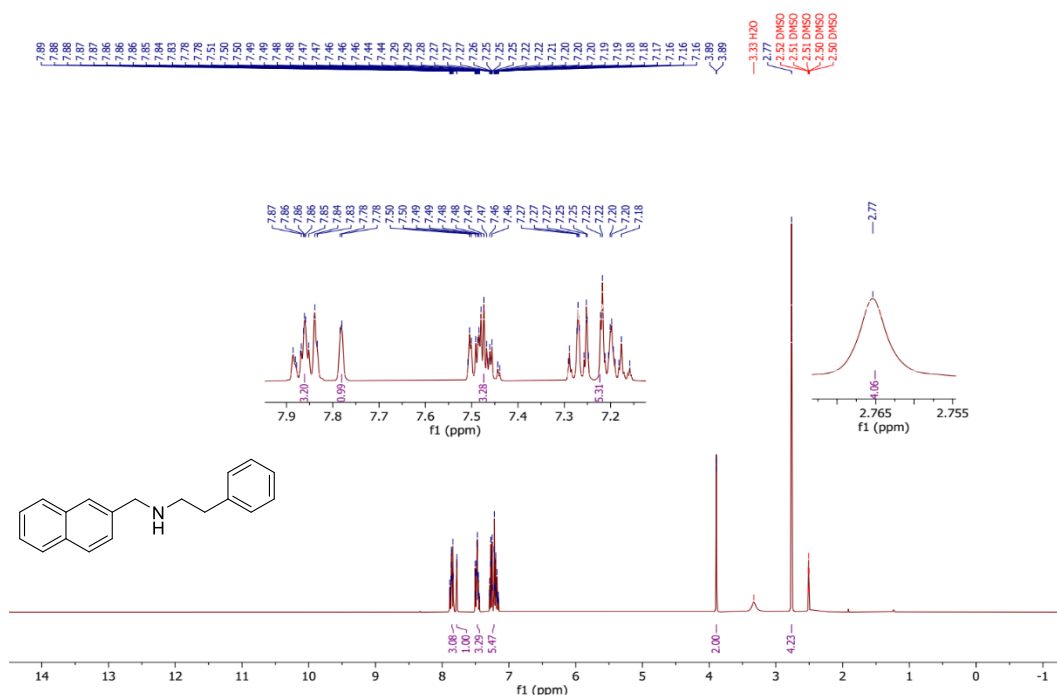

6. (Compound **9** -<sup>13</sup>CNMR)

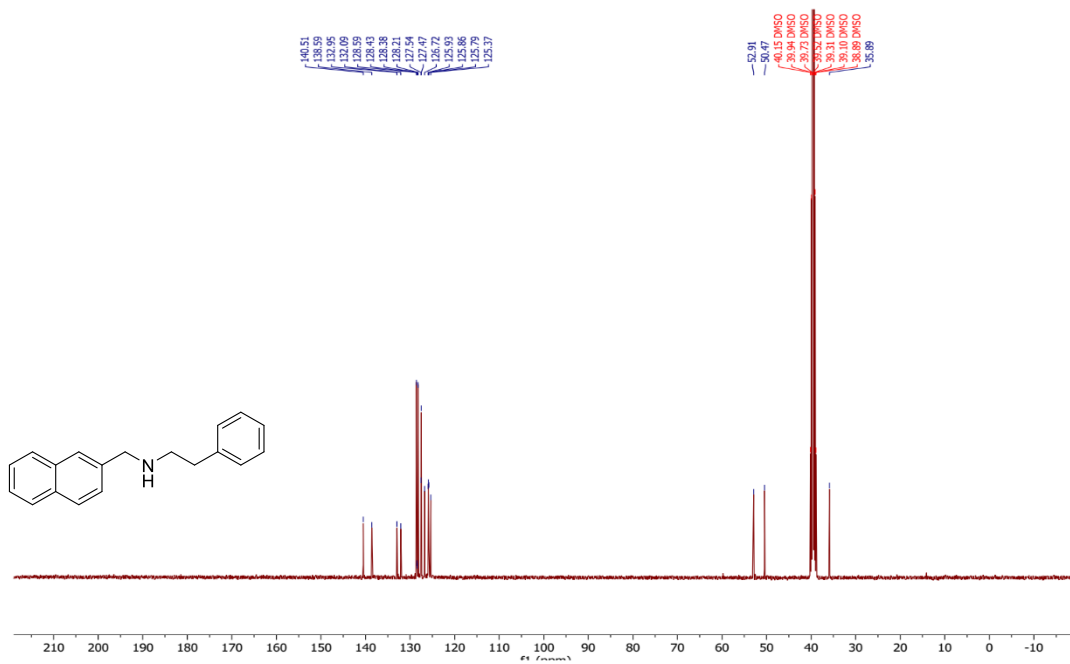

7. Compound **9** –  $^{13}\text{C}$ NMR-dept 135

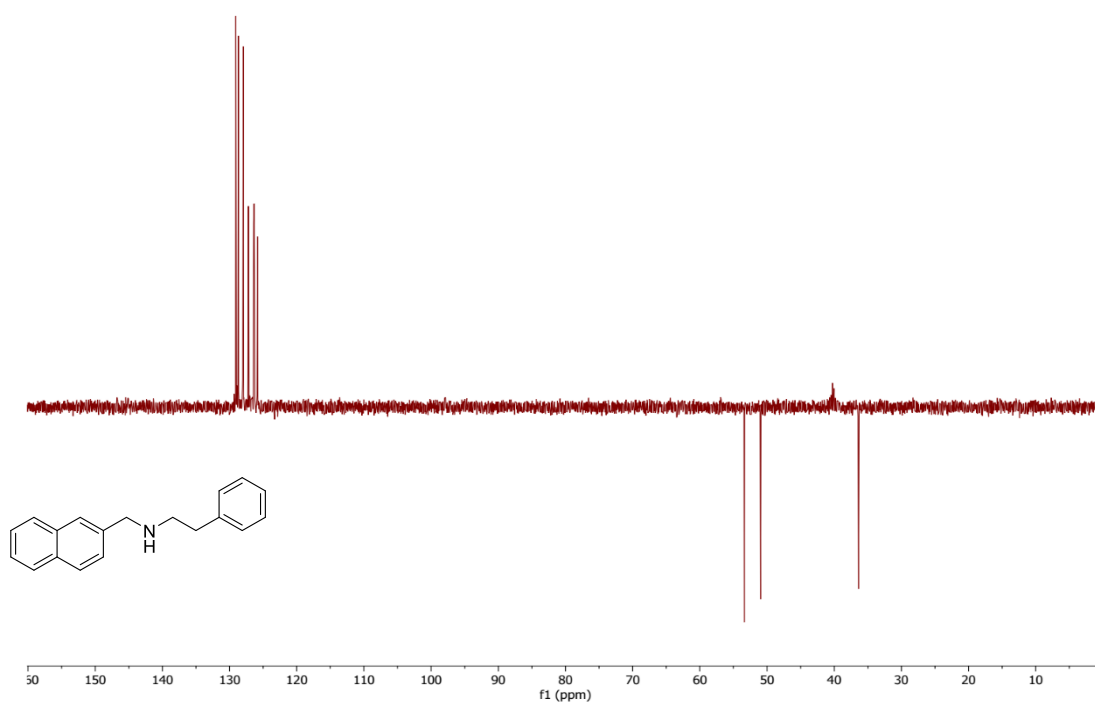

8. Compound **9** -HSQC

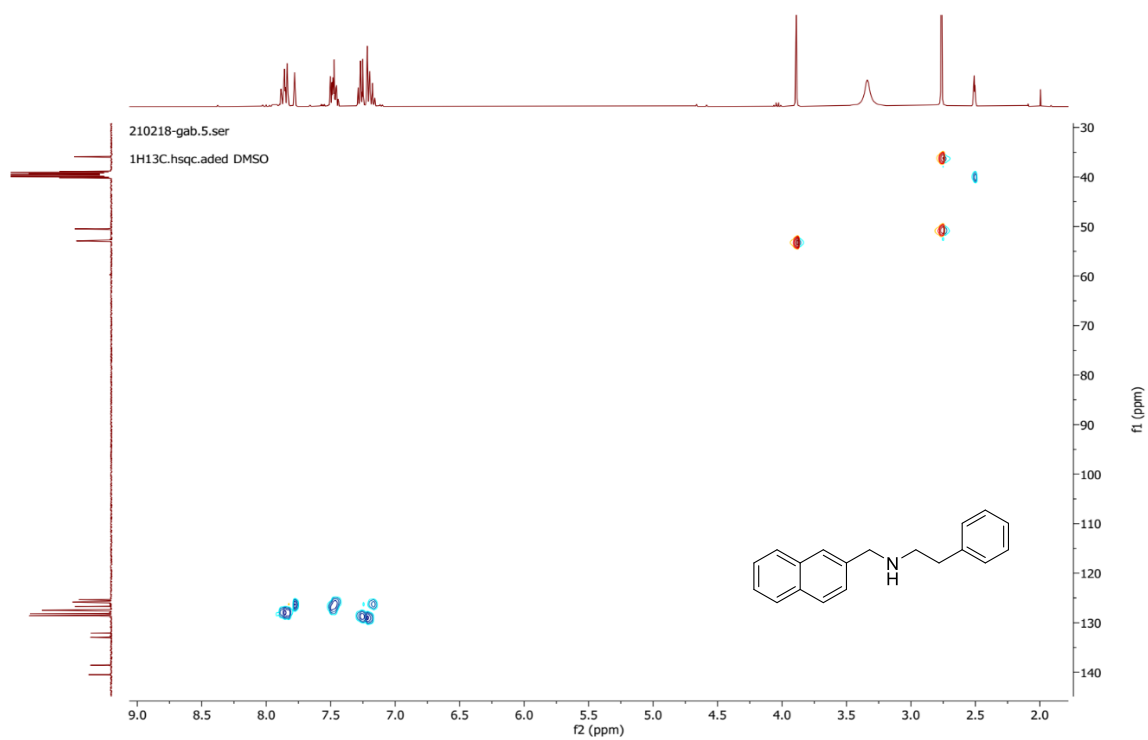

9. (Compound **24** -  $^1\text{H}$ NMR)

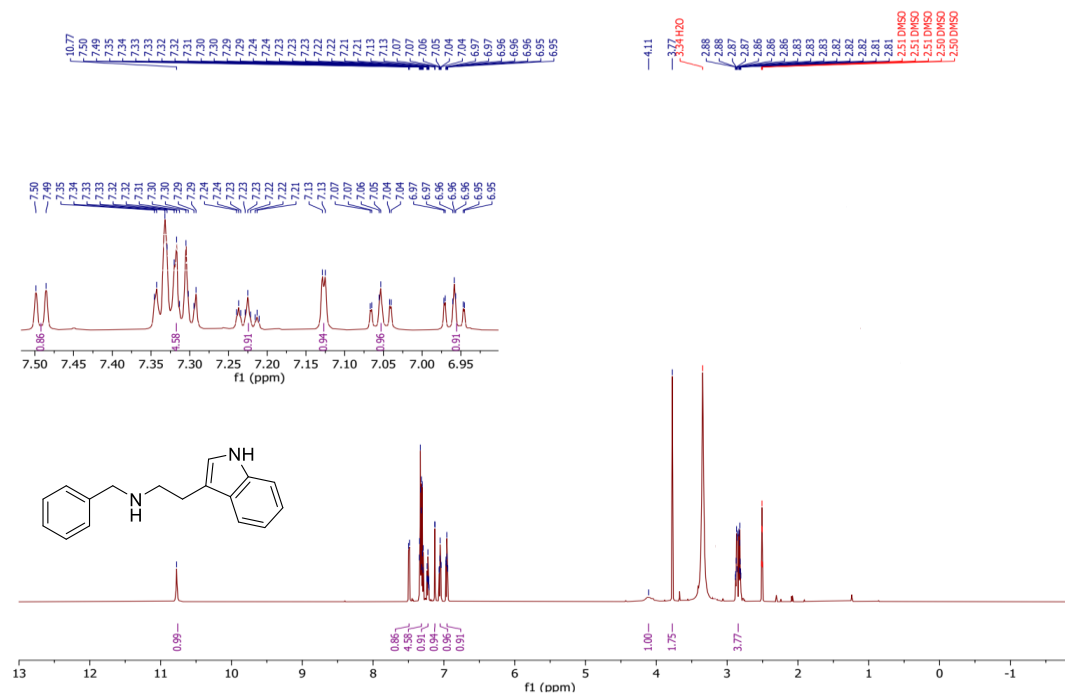

10. Compound **24**-  $^{13}\text{C}$ NMR

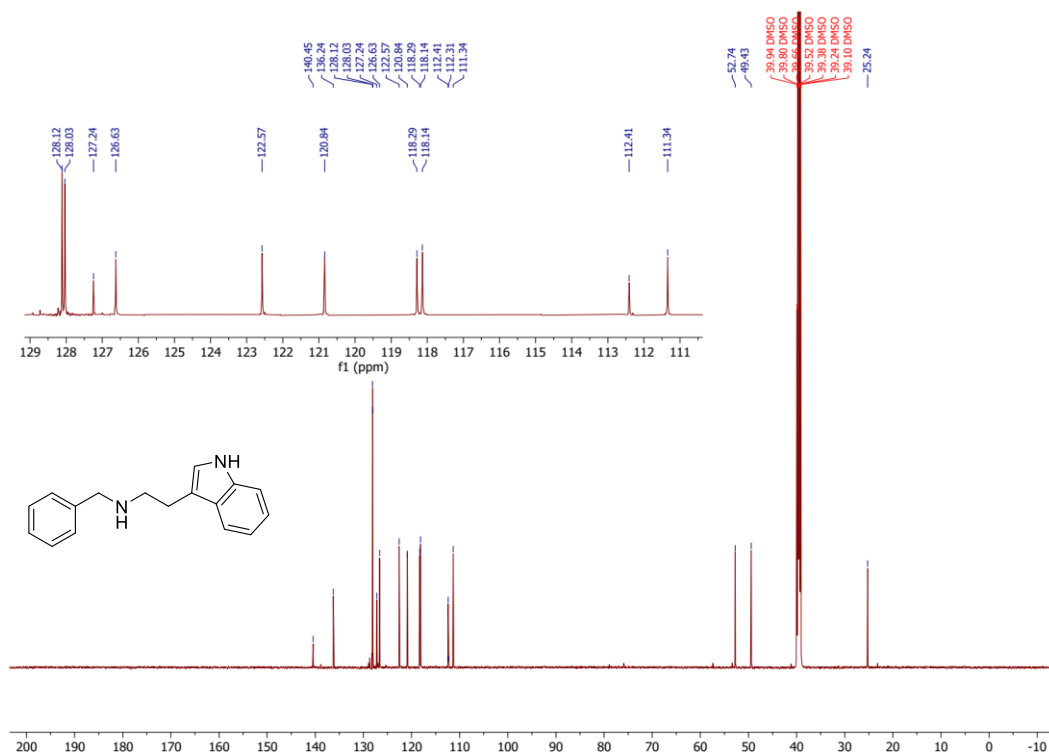

11. Compound **24**-  $^{13}\text{C}$ NMR-dept 135

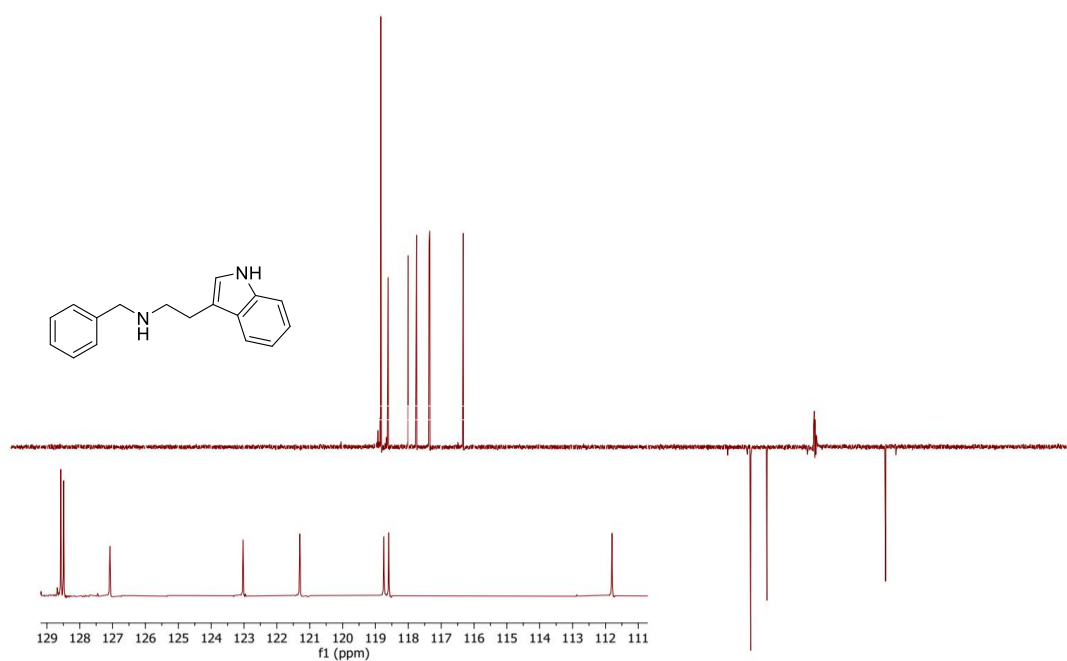

12. Compound **24**-  $^{13}\text{C}$ NMR-dept 90

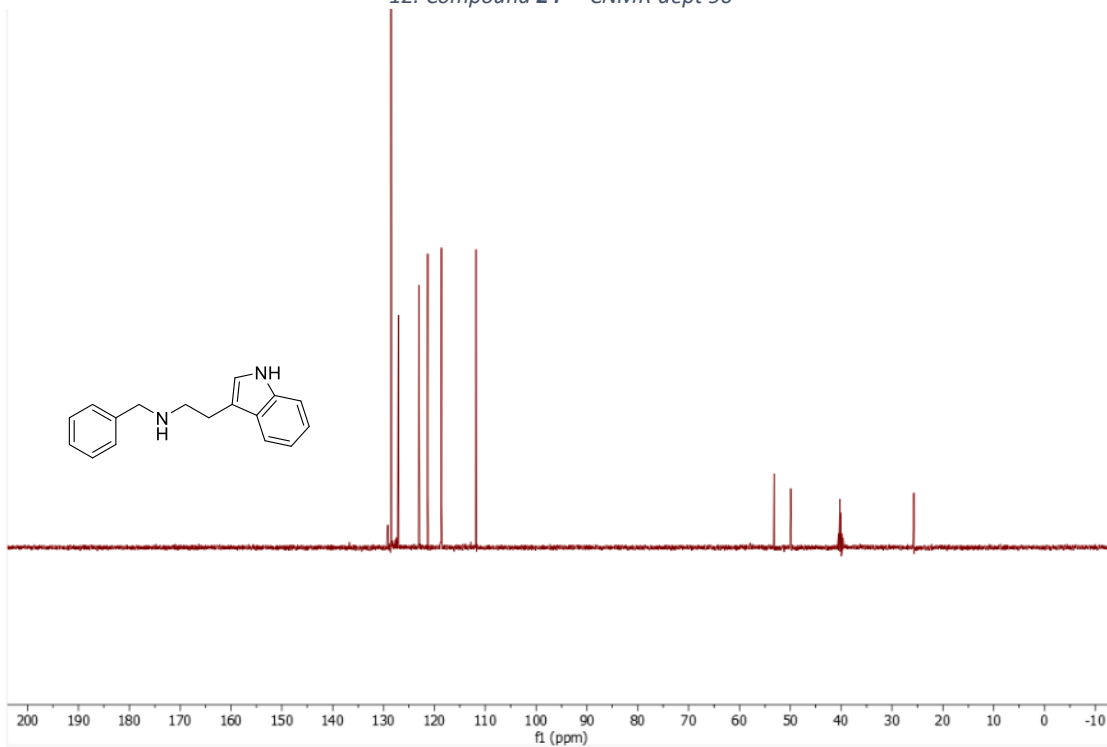

## 7- $^1\text{H}$ , and $^{13}\text{C}$ NMR of Boc-naphthyl-indole and naphthyl-phenyl based peptoids.

### 13. Compound **11a**- <sup>1</sup>HNMR

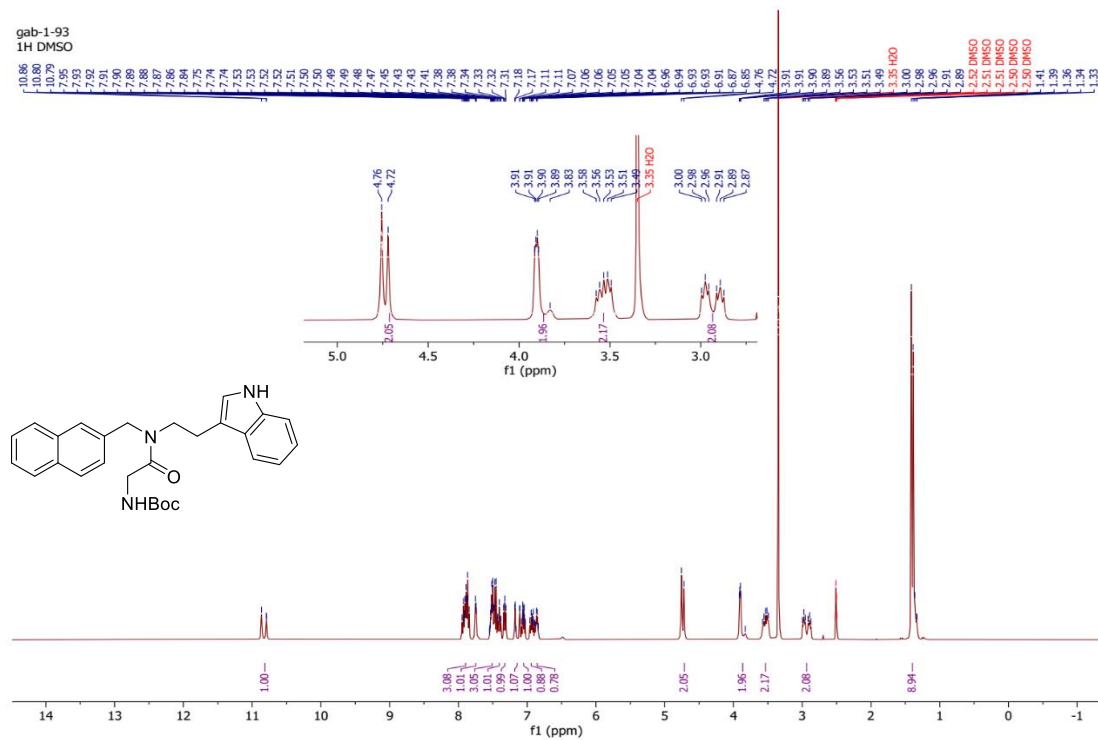

#### 14. Compound **11a**- <sup>13</sup>CNMR

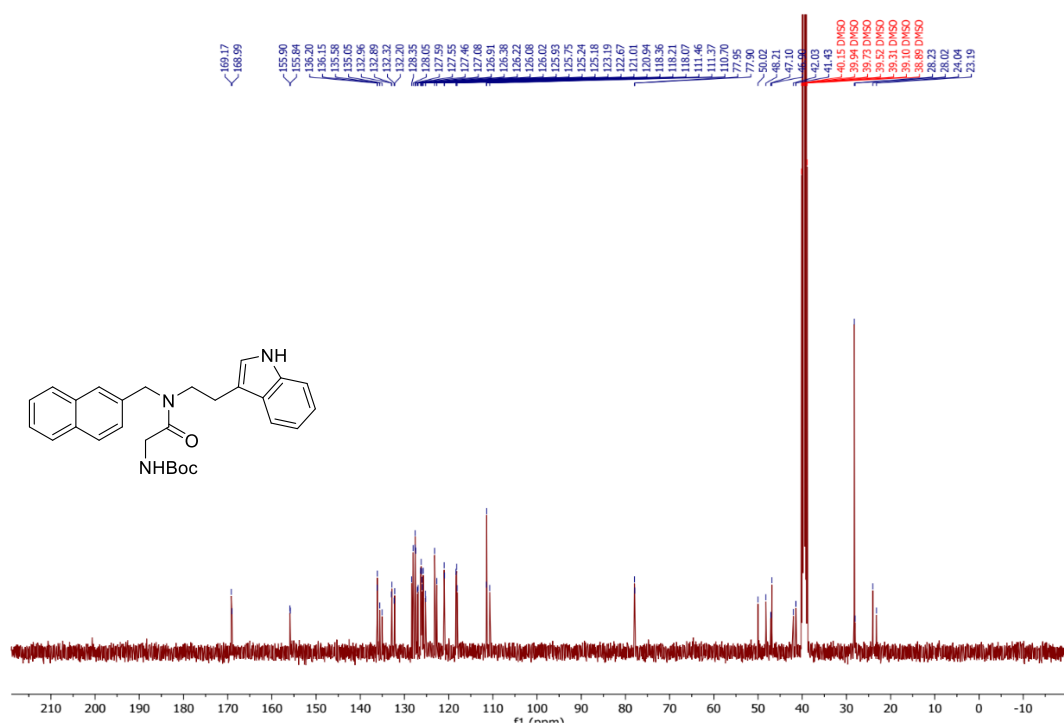

15. Compound **11a**-<sup>13</sup>CNMR-dept 135

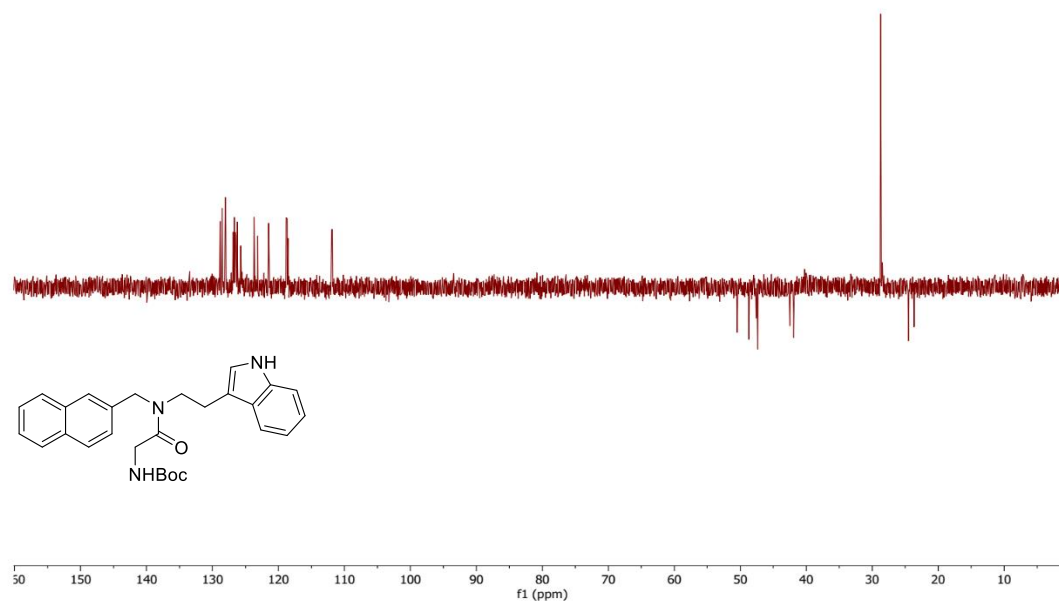

16. Compound **11a**-HSQC

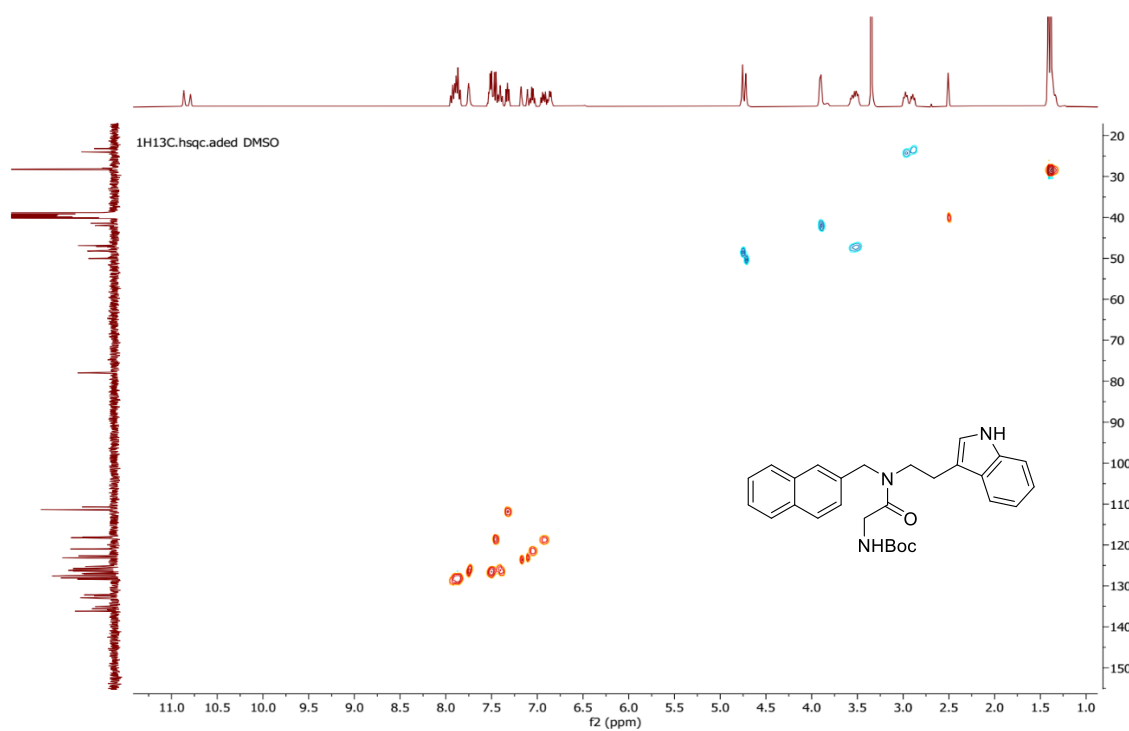

### 17. Compound **11b** - <sup>1</sup>H NMR

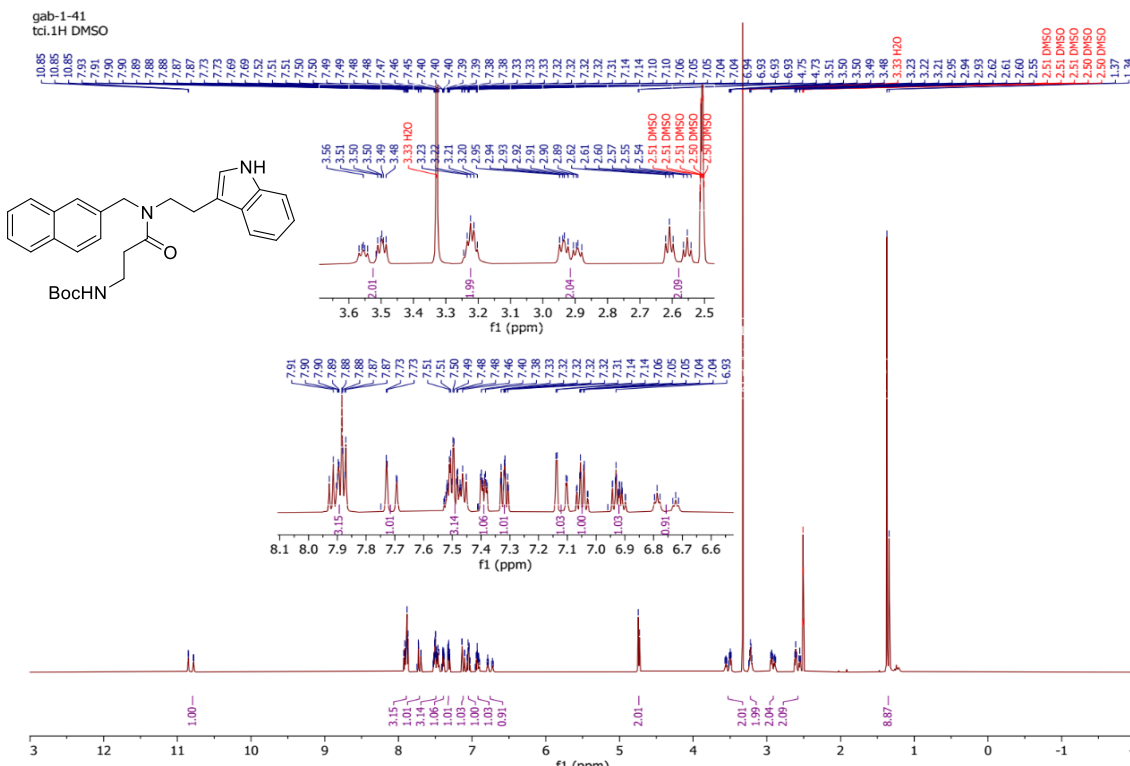

### 18. Compound **11b** -<sup>13</sup>CNMR

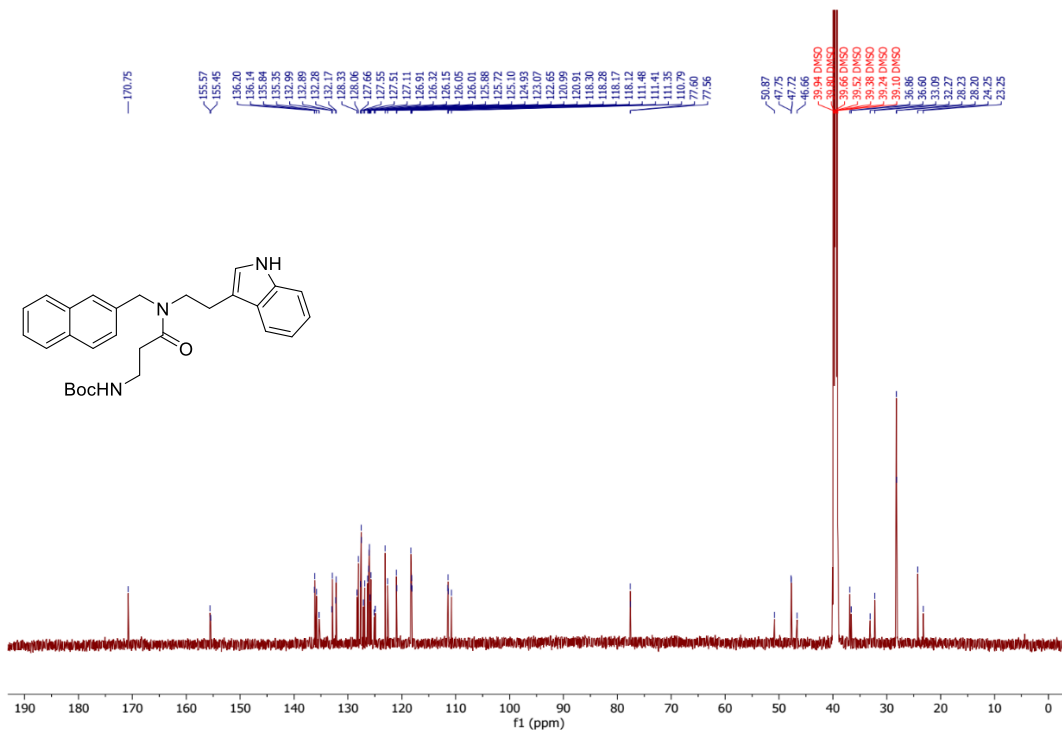



19. Compound **11b** -<sup>13</sup>CNMR dept135

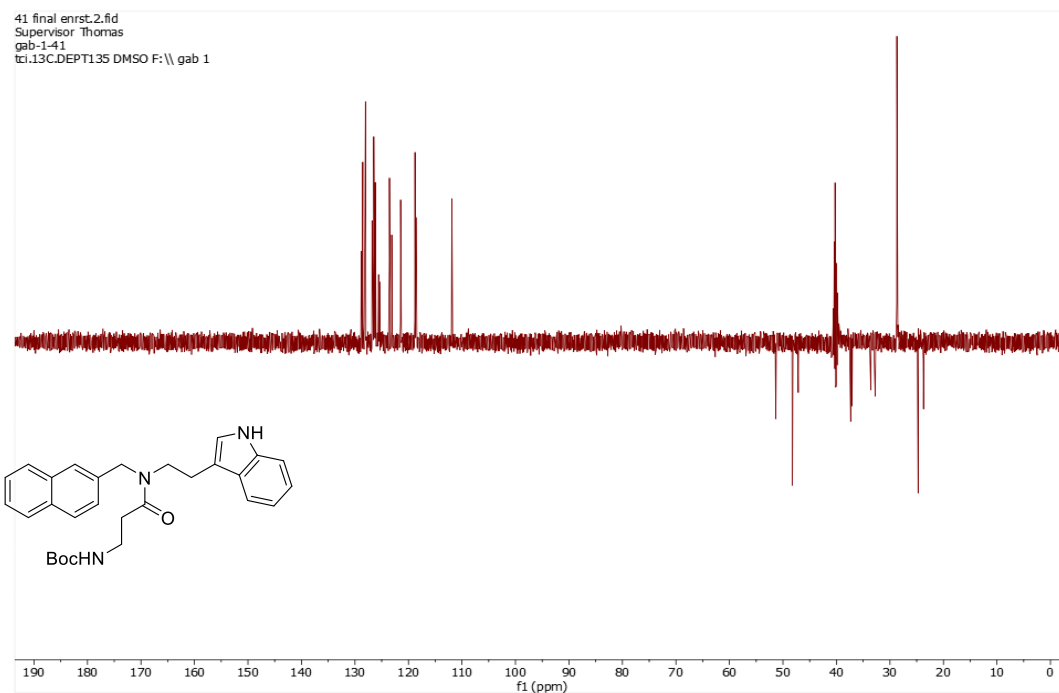

20. Compound **11b** -HSQC

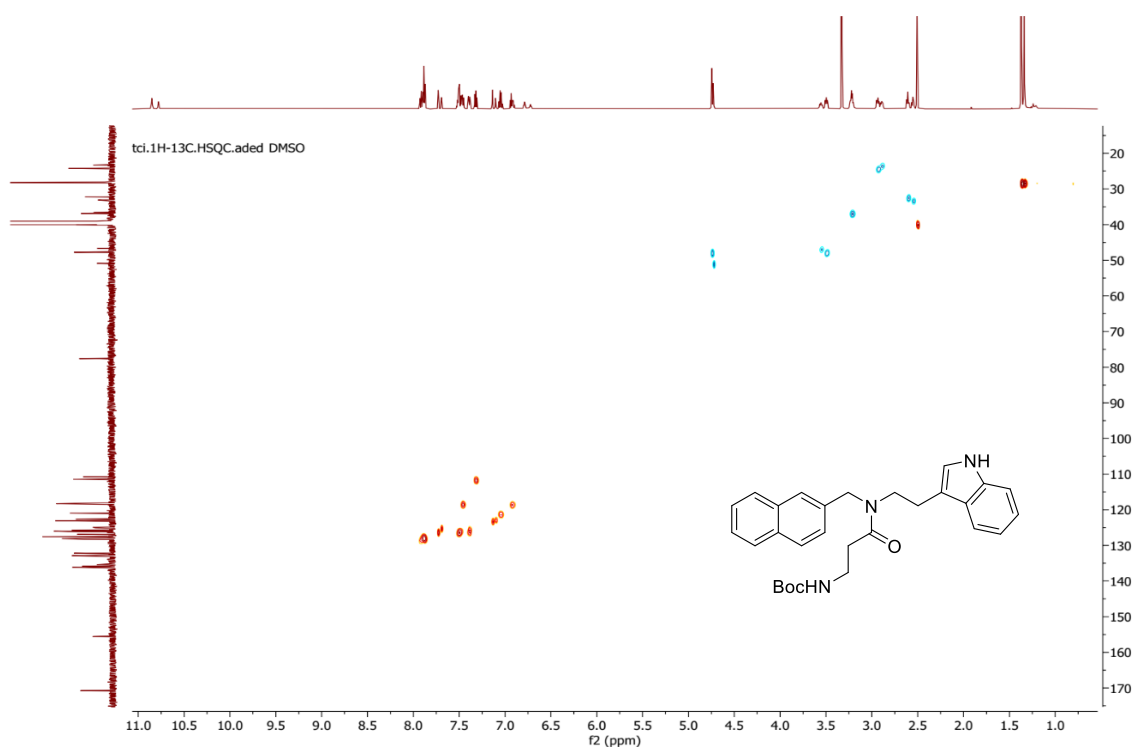

## 21. Compound 11c - <sup>1</sup>H NMR

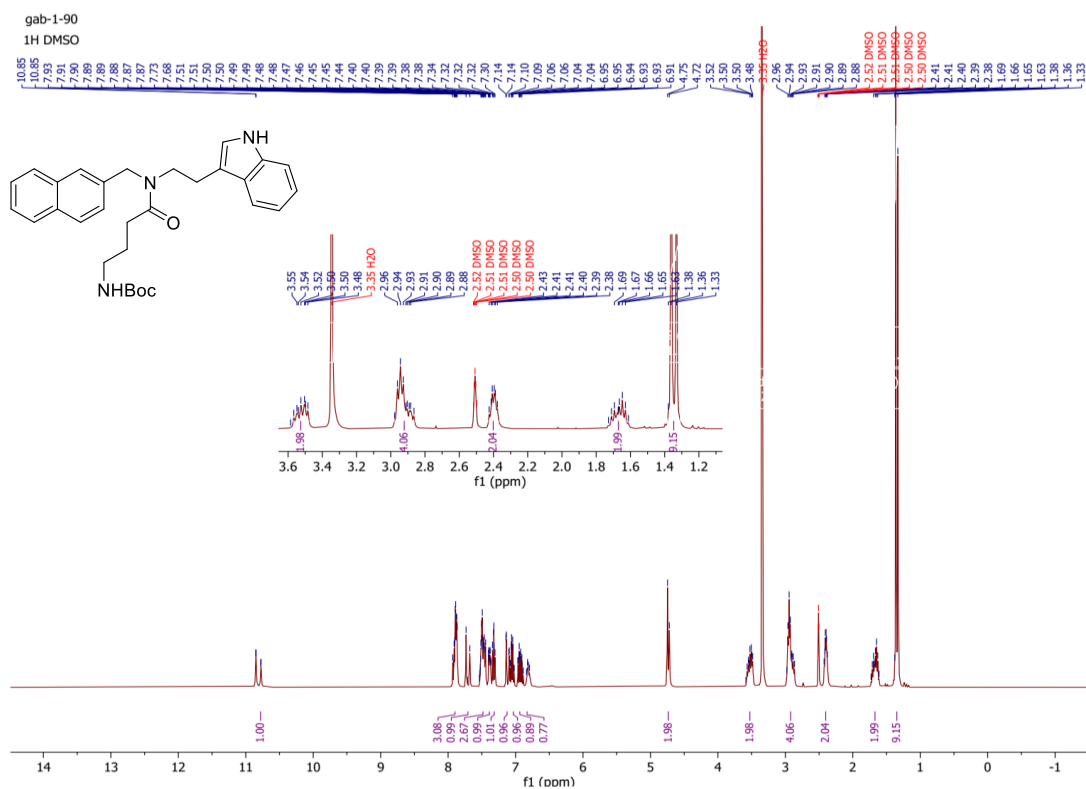

## 22. Compound 11c - <sup>13</sup>C NMR

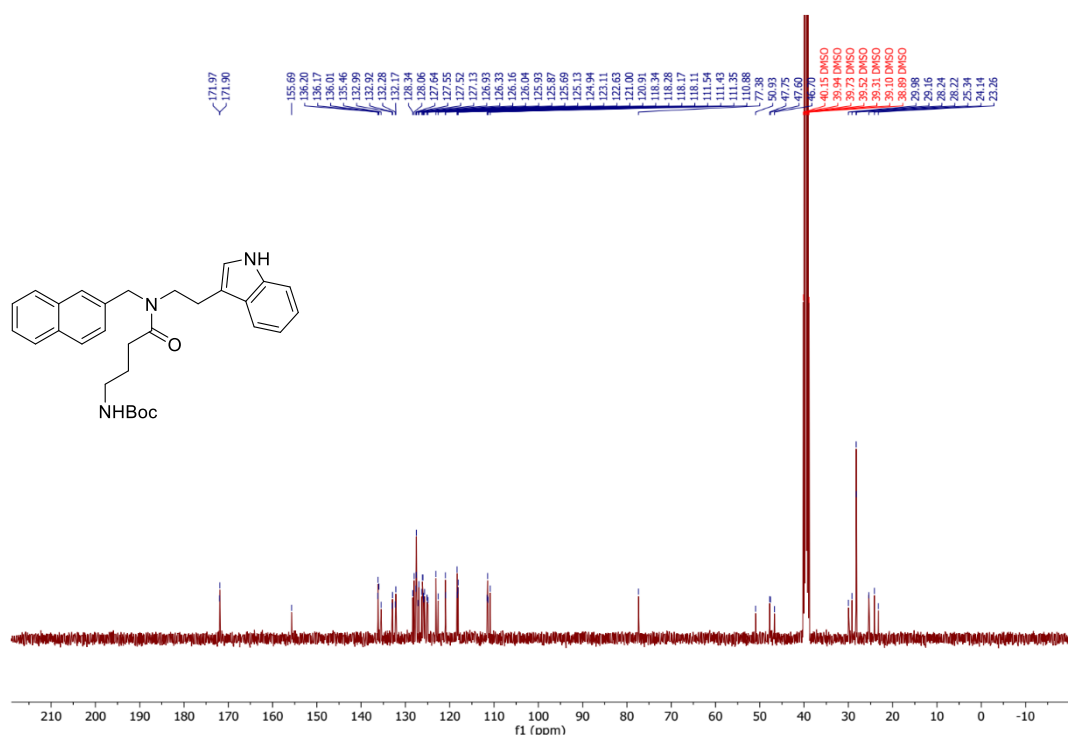

23. Compound **11c** -<sup>13</sup>CNMR dept 135

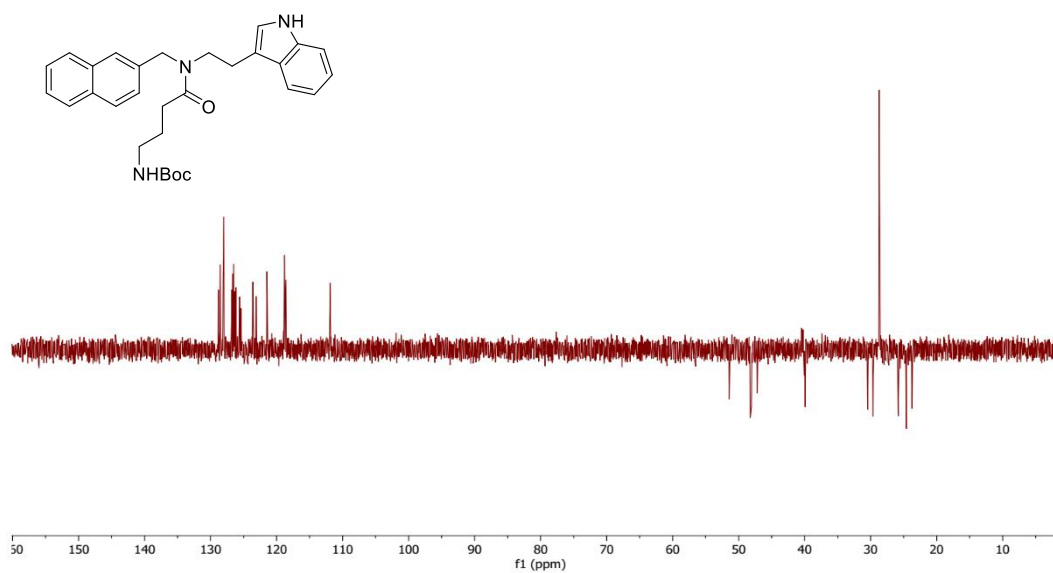

24. (Compound **11c** - HSQC)

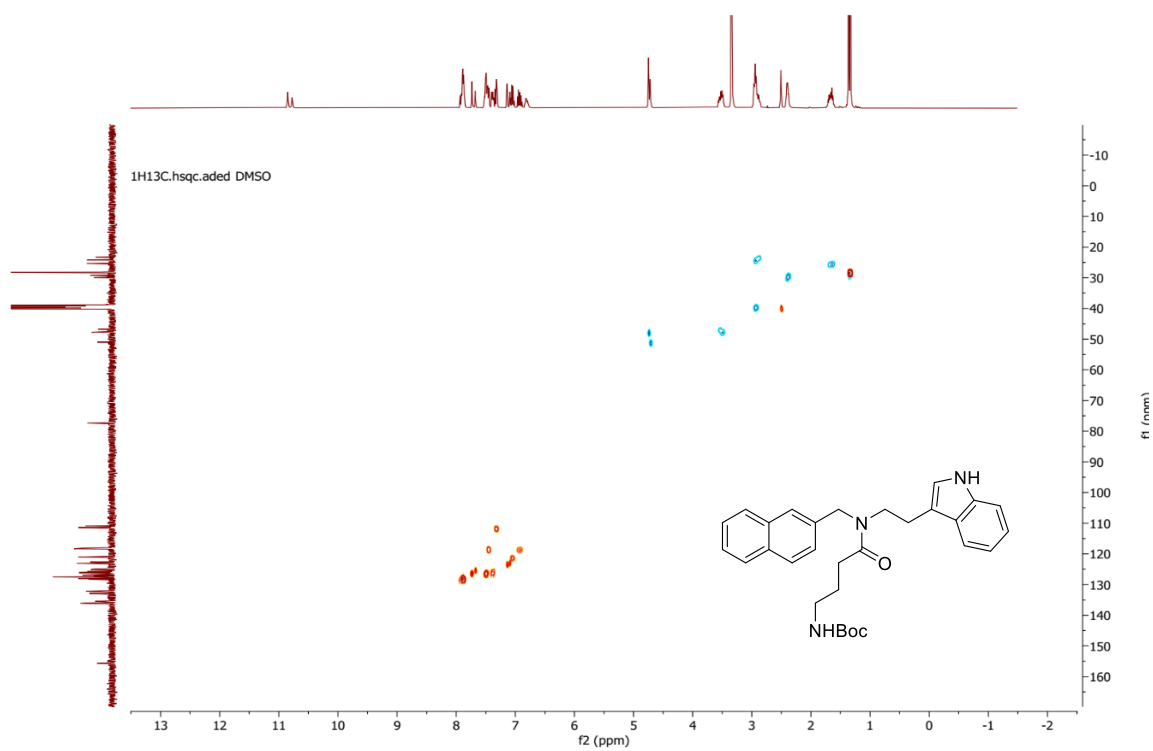

25. (Compound **11d** -  $^1\text{H}$ NMR)

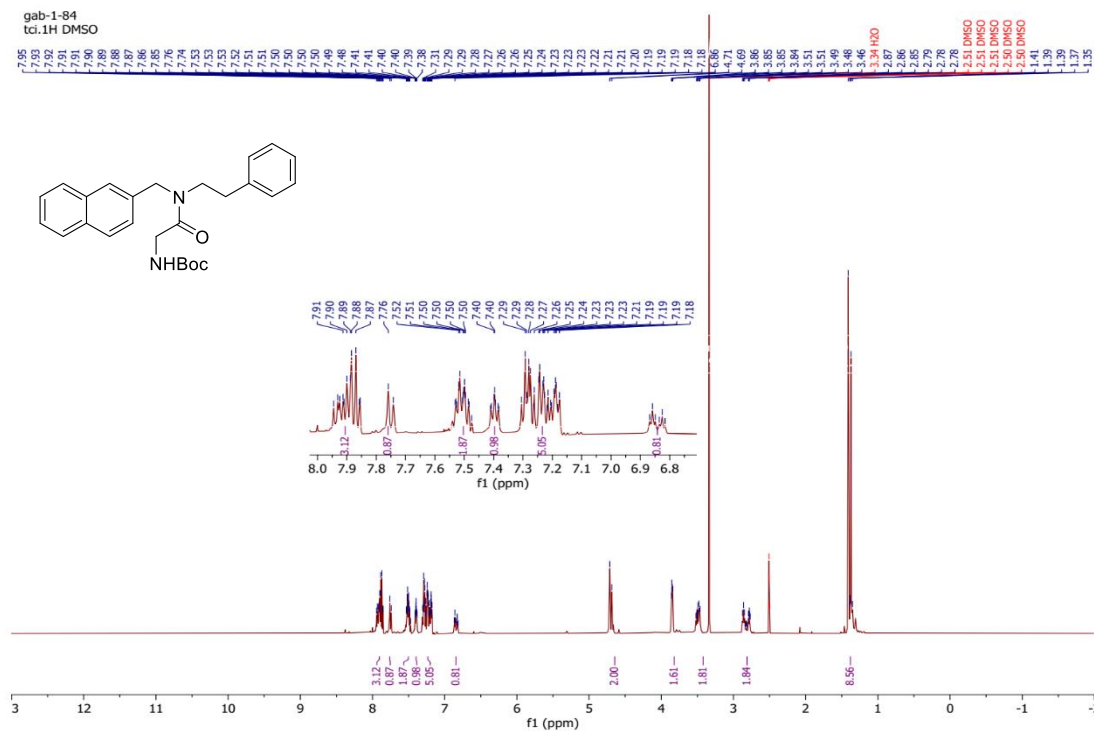

### 26. Compound **11d** - $^{13}\text{C}$ NMR

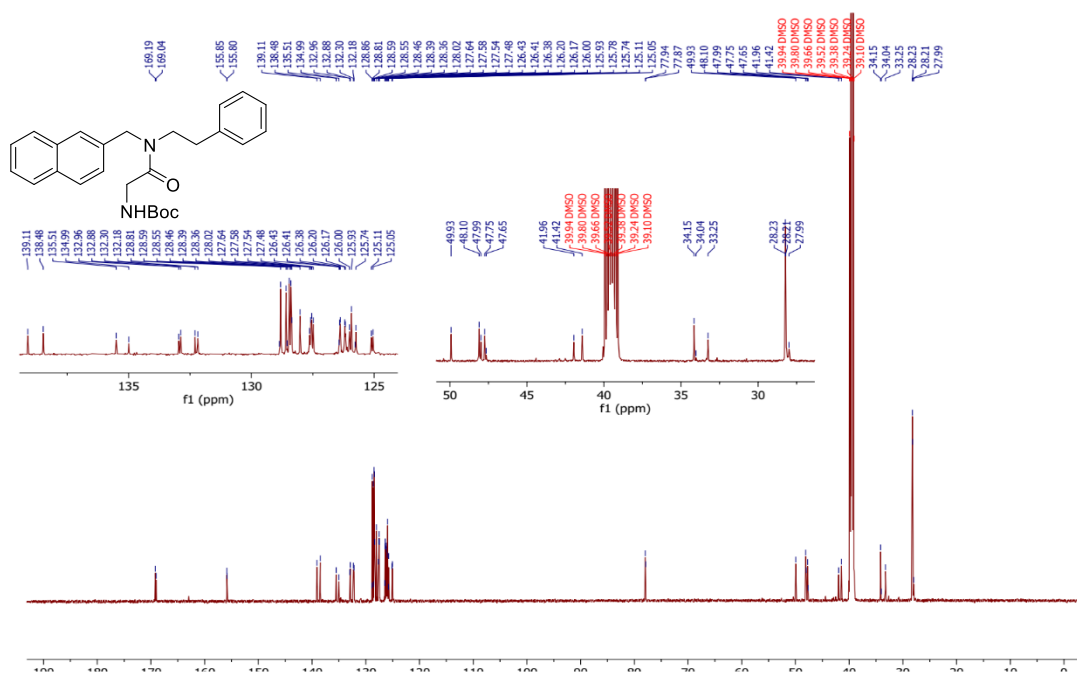

27. Compound **11d** -  $^{13}\text{C}$ NMR dept 135

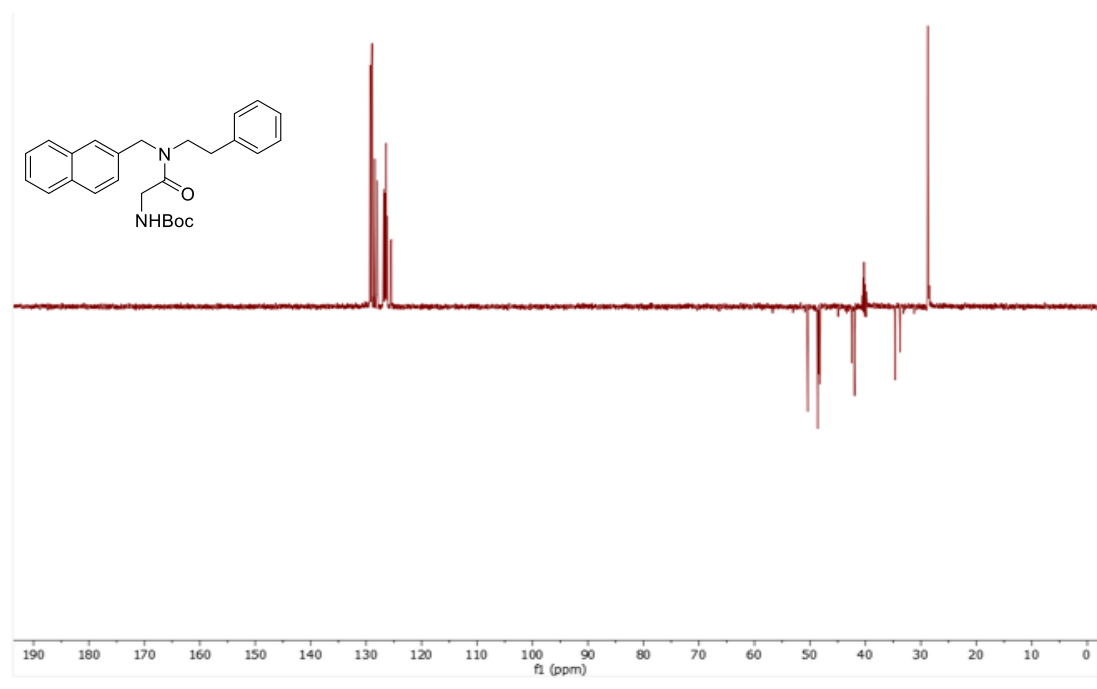

28. Compound **11d** - HSQC)

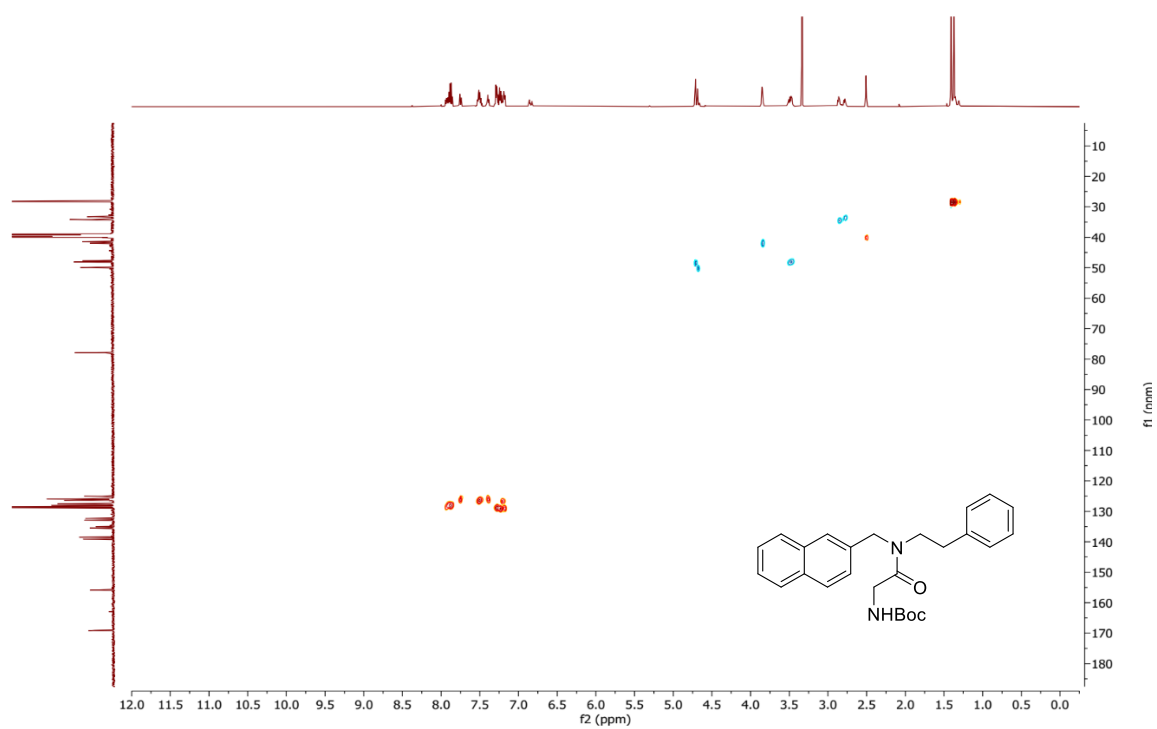

### 29. Compound **11e** - $^1\text{H}$ NMR

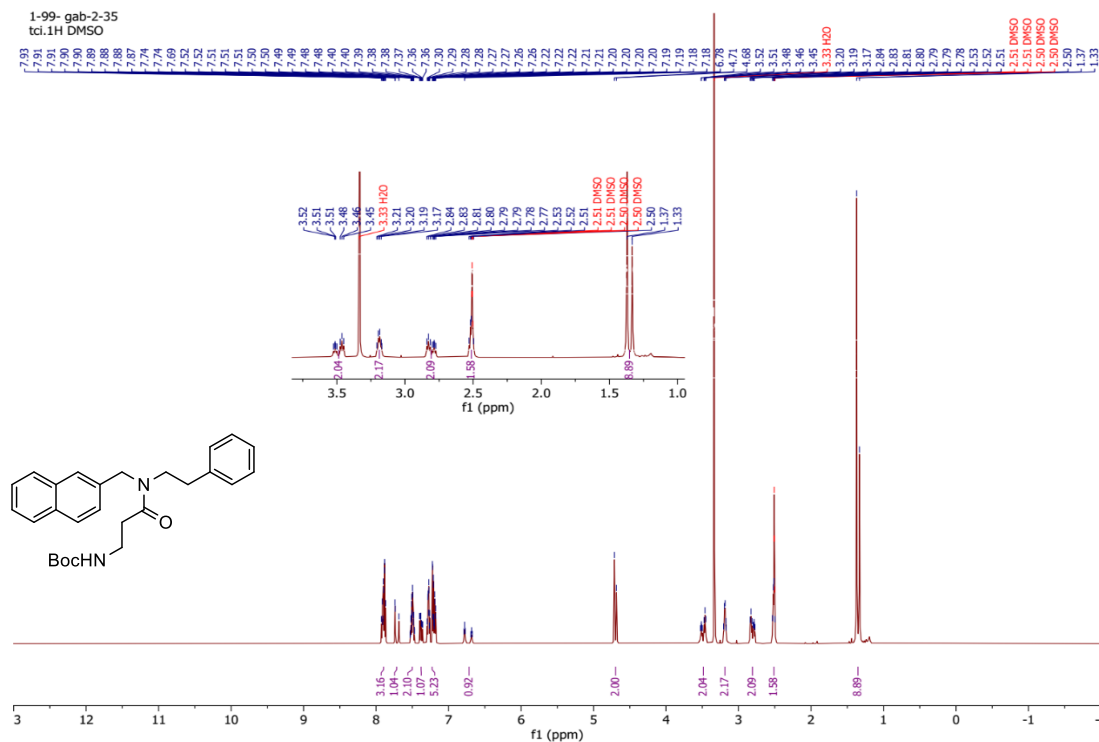

### 30. Compound **11e** - $^{13}\text{C}$ NMR

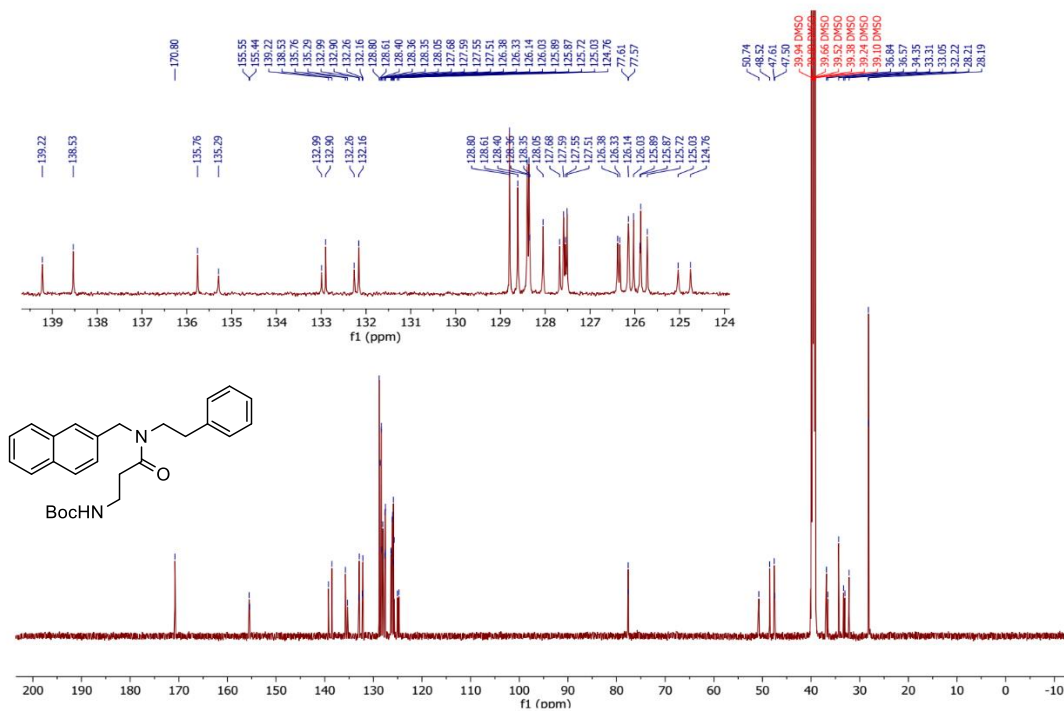

### 31. Compound **11e** - $^{13}\text{C}$ NMR-dept 135

2-35.23.fid  
Supervisor naresh  
gab-2-35  
tci.13C.DEP T135 DMSO F:\ gab 17

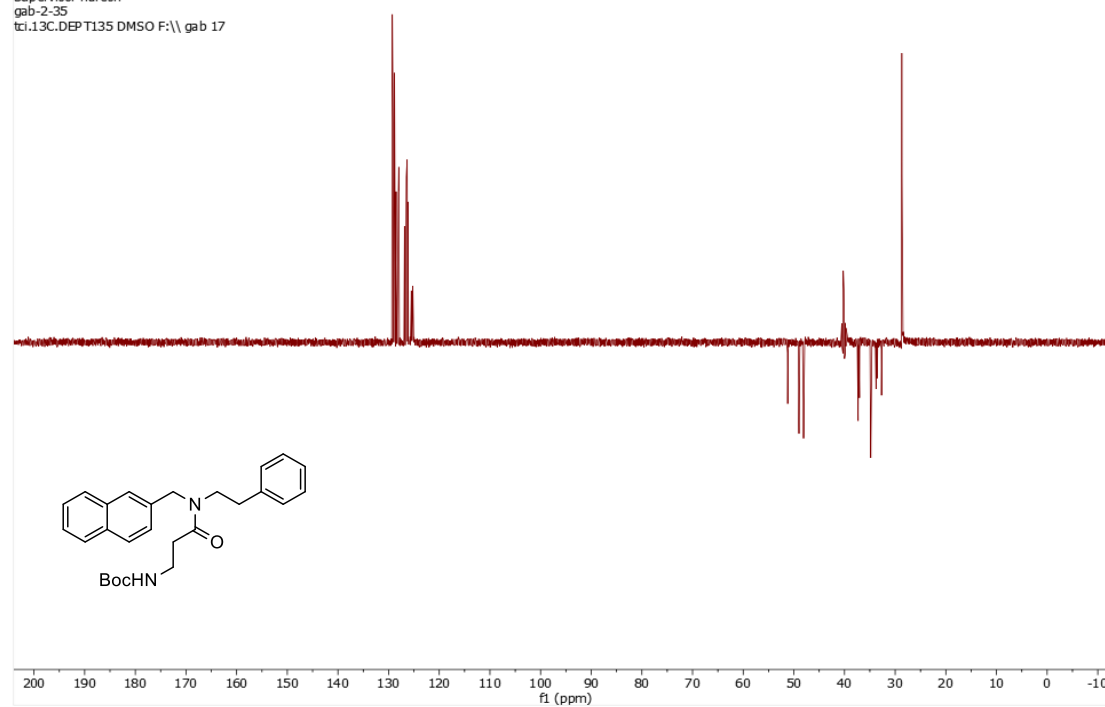

### 32. Compound **11e** - HSQC

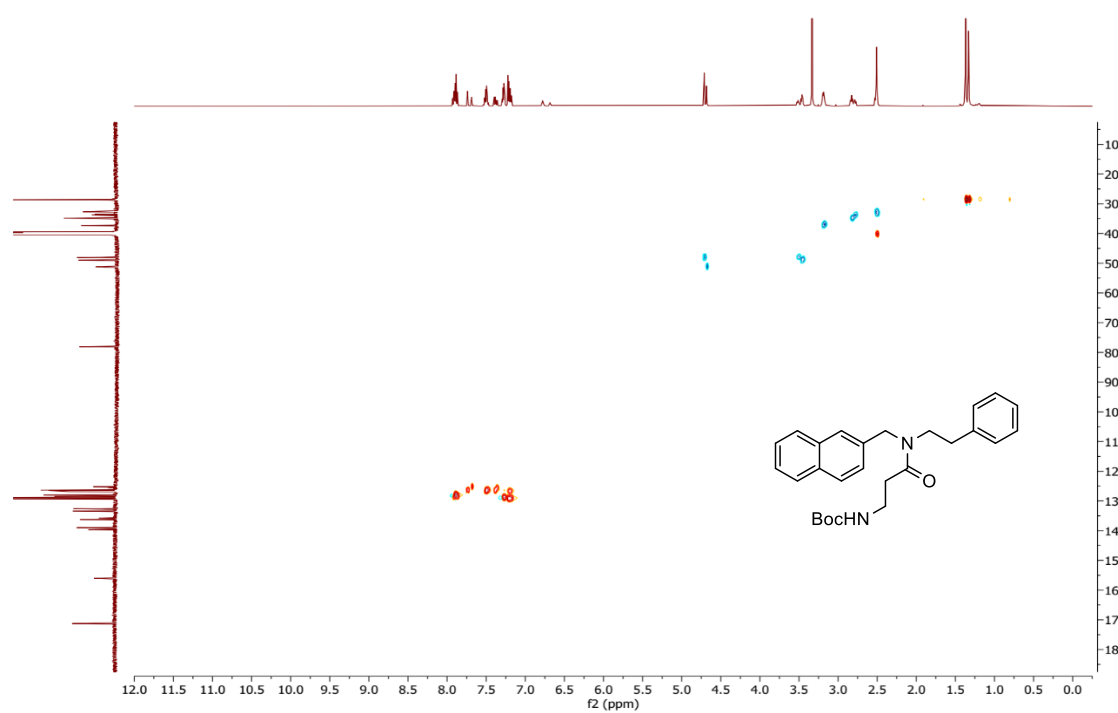

### 33. Compound **11f** - $^1\text{H}$ NMR)

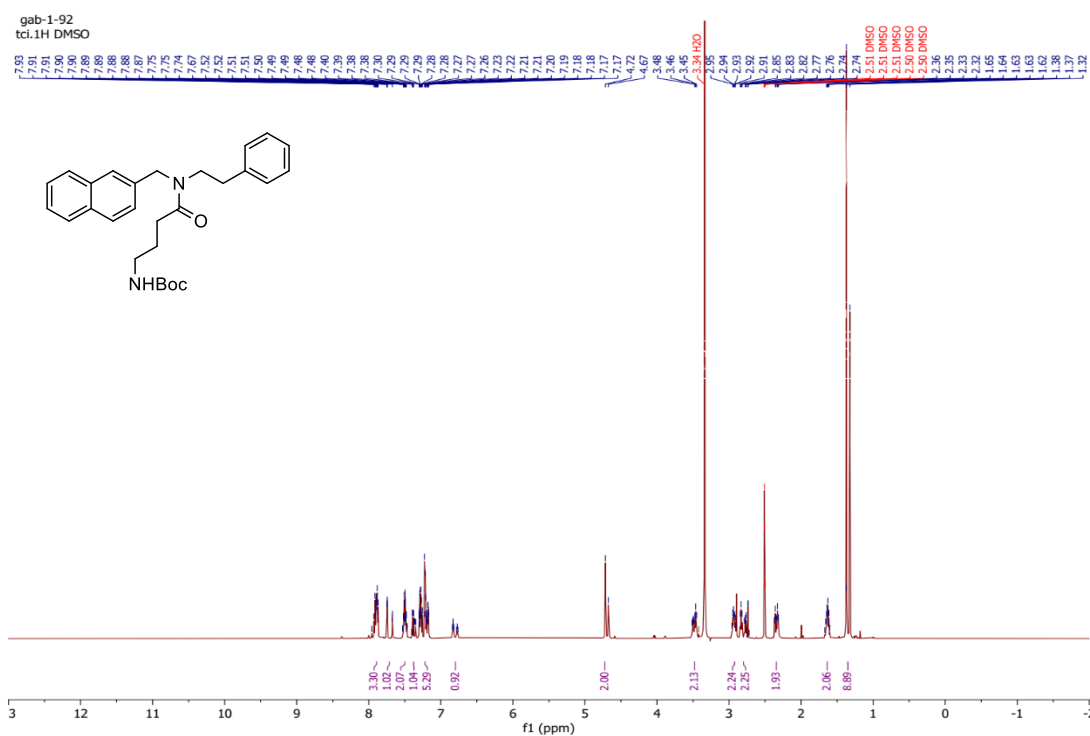

### 34. Compound **11f** - $^{13}\text{C}$ NMR

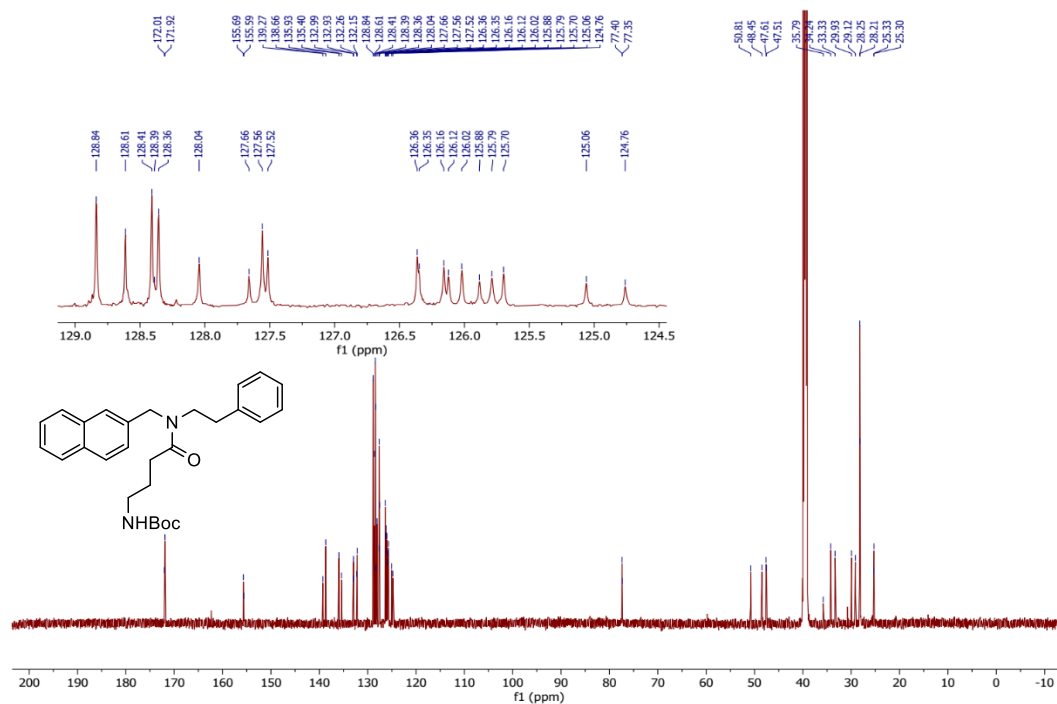



35. Compound **11f** -  $^{13}\text{C}$ NMR-dept 135

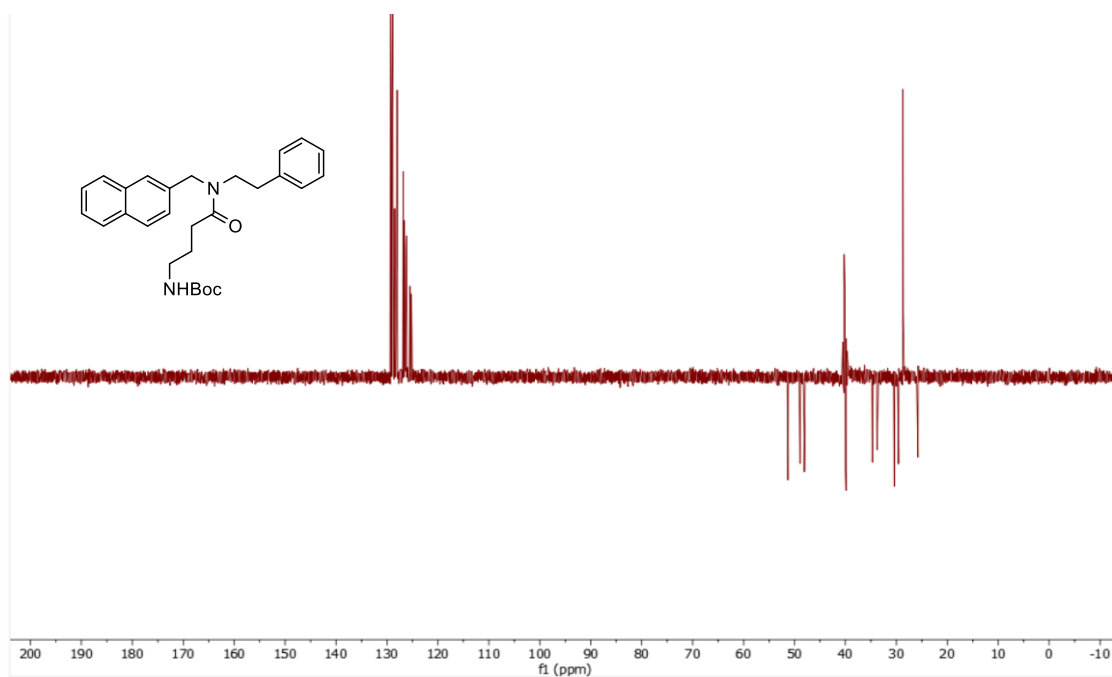

36. Compound **11f** -HSQC)

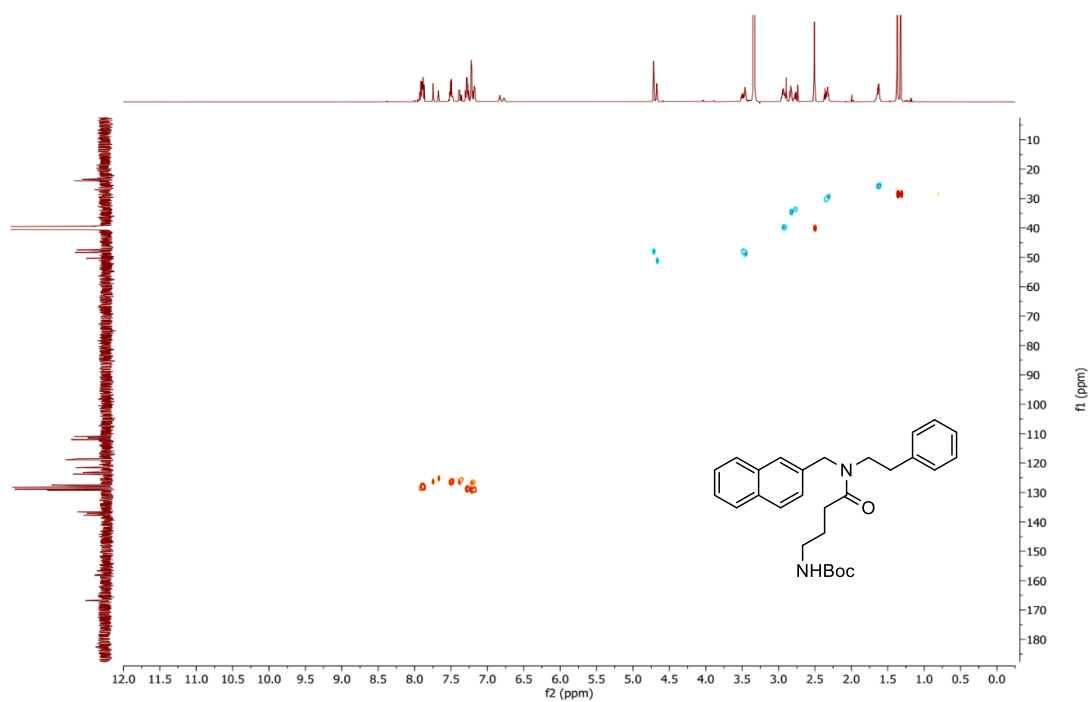

### 37. Compound **25**-<sup>1</sup>HNMR

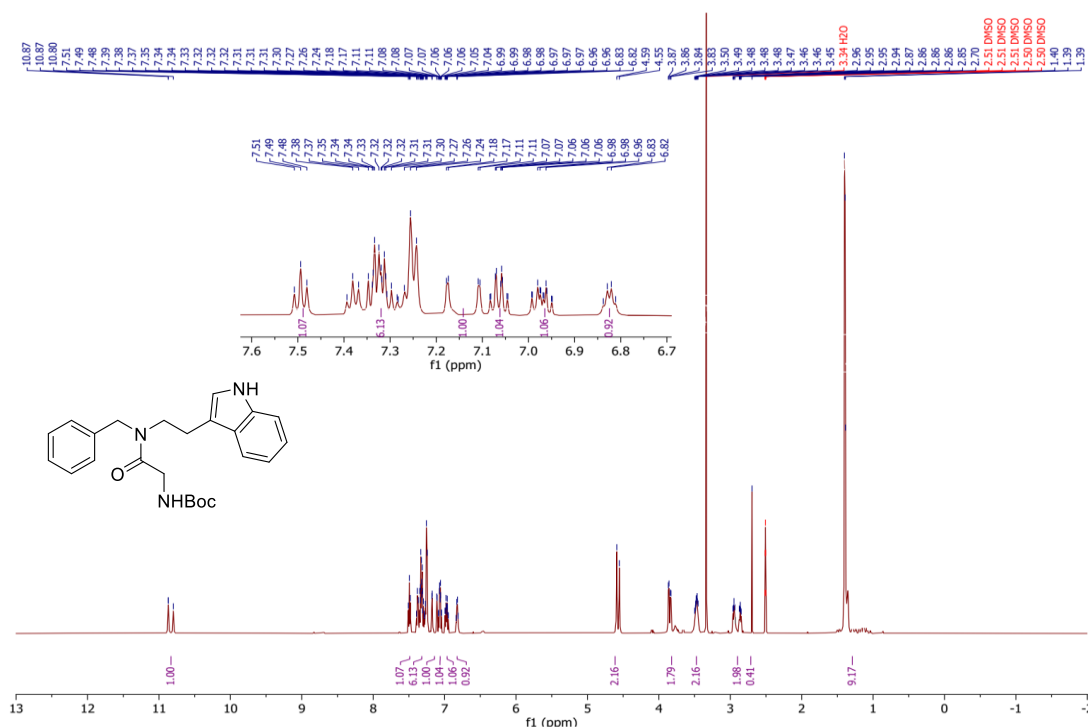

### 38. Compound **25** -<sup>13</sup>CNMR

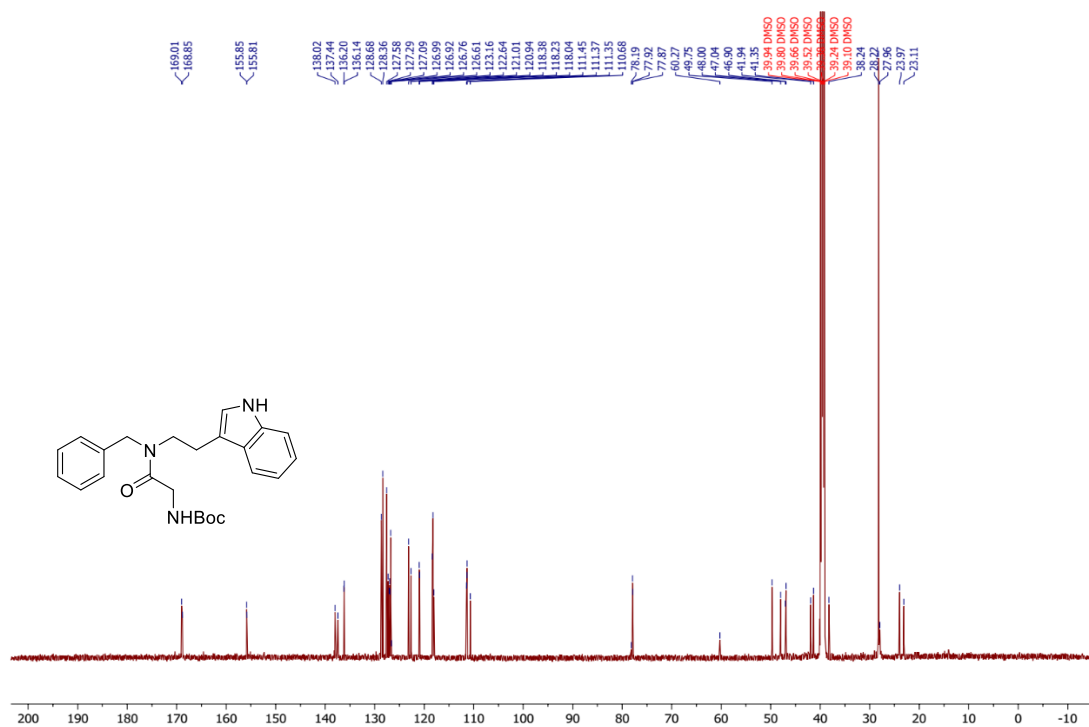

39. Compound **25** -<sup>13</sup>CNMR dept 135

220118-gab.8.fid  
Supervisor naresh  
gab-1-85  
tcl.13C.DEPT135 DMSO {F:\Ernst} gab 17

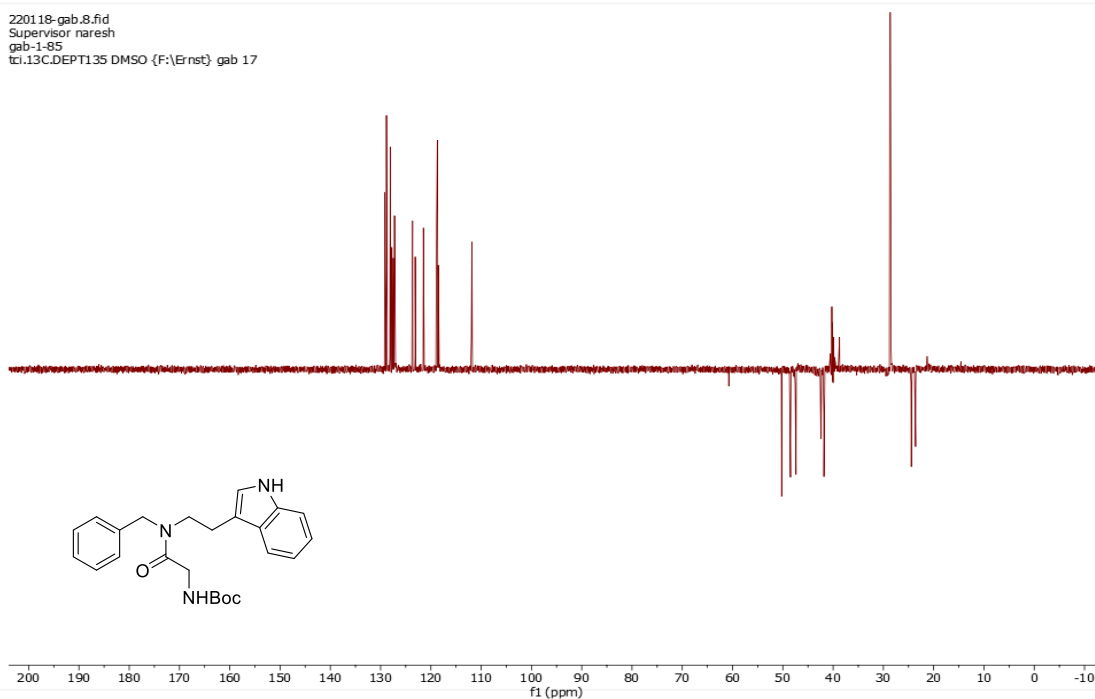

40. Compound **25** -HSQC

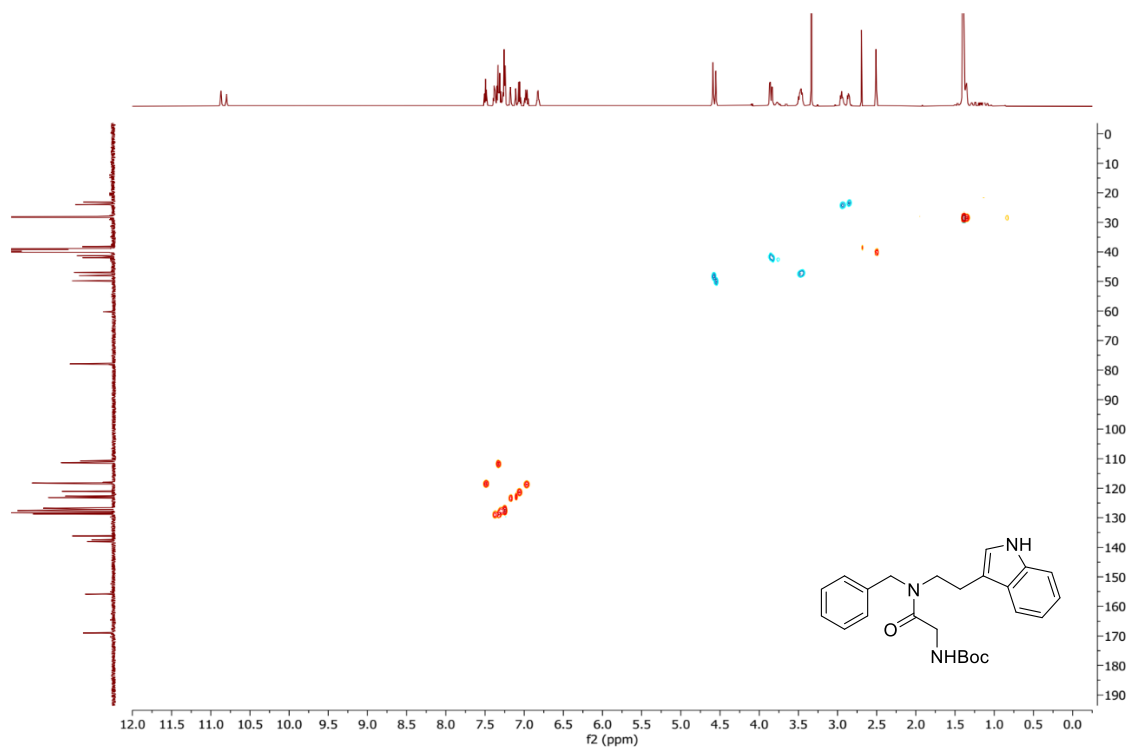

#### 41. Compound **18b** - $^1\text{H}$ NMR

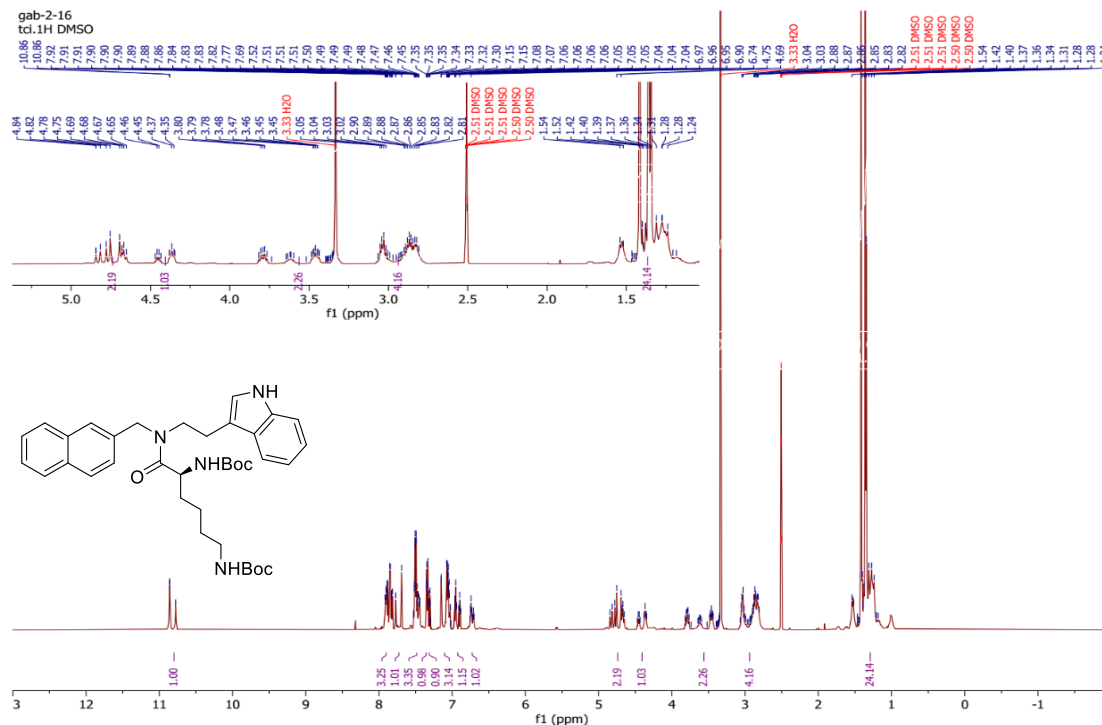

#### 42. Compound **18b**- <sup>13</sup>CNMR

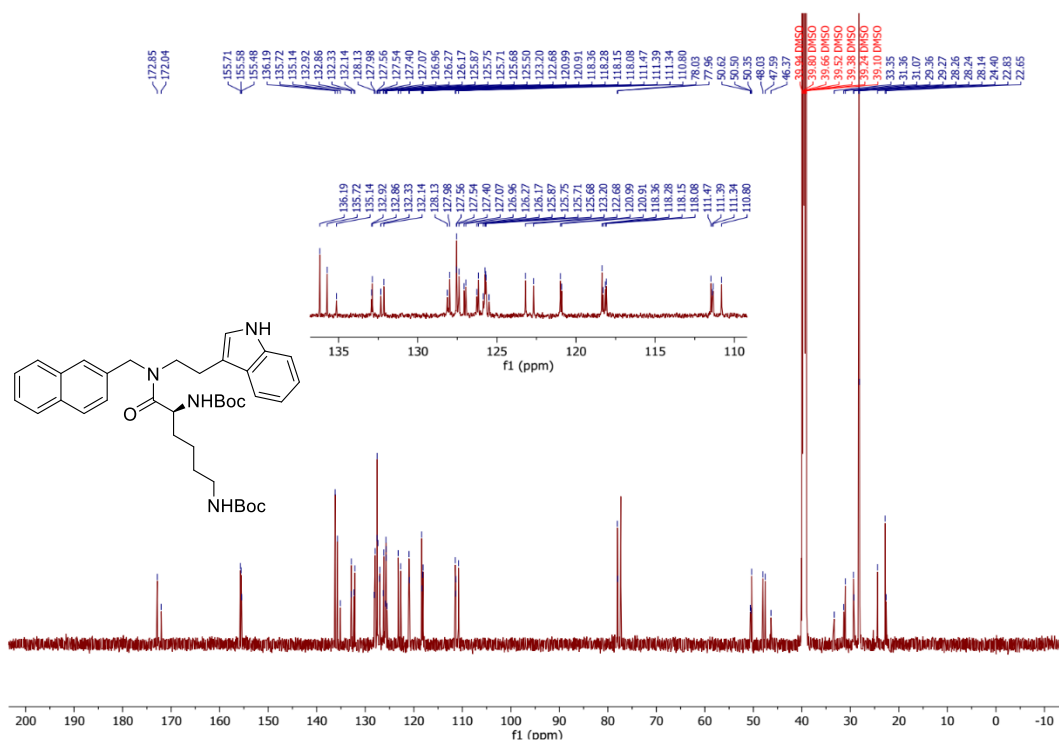

43. Compound **18b**-  $^{13}\text{C}$ NMR dept 135

220118-gab.3.fid  
Supervisor naresh

gab-2-16

tdi.13C.DEPT135 DMSO {F:\Ernst}.gab 16

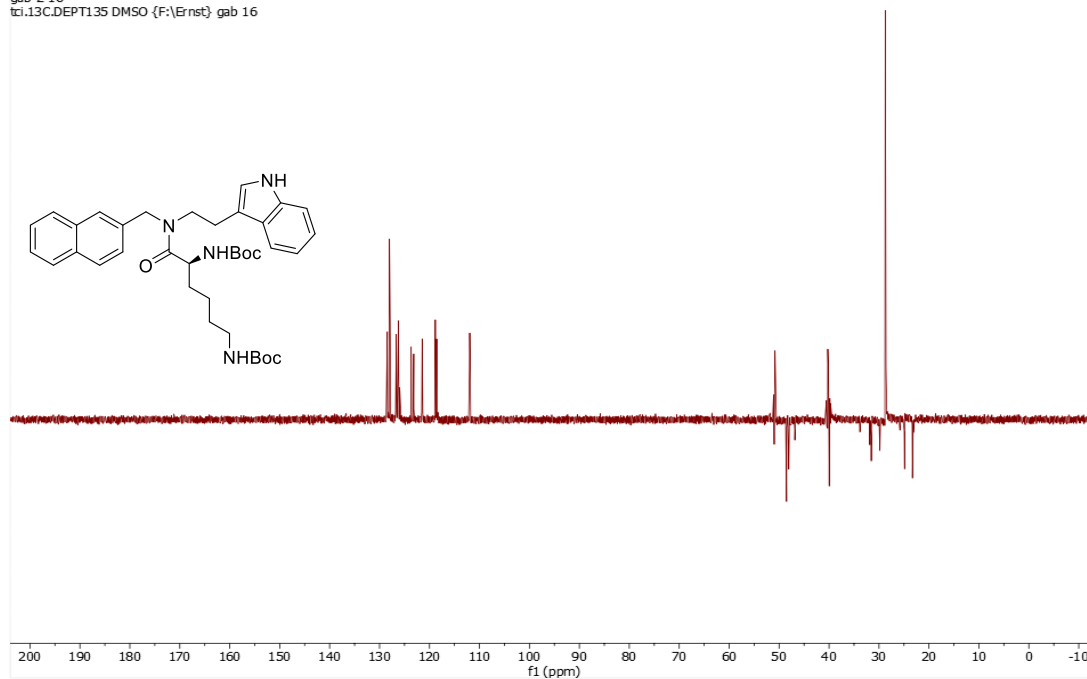

44. Compound **18b**- HSQC

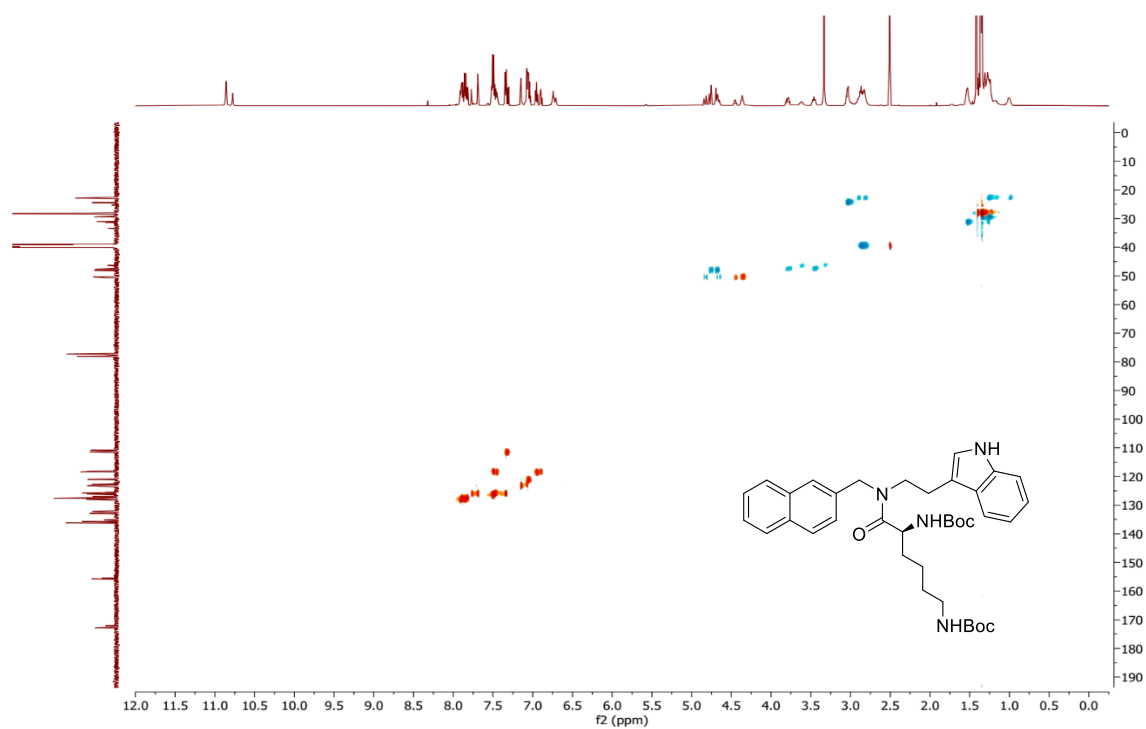

45. Compound **18a** -  $^1\text{H}$ NMR

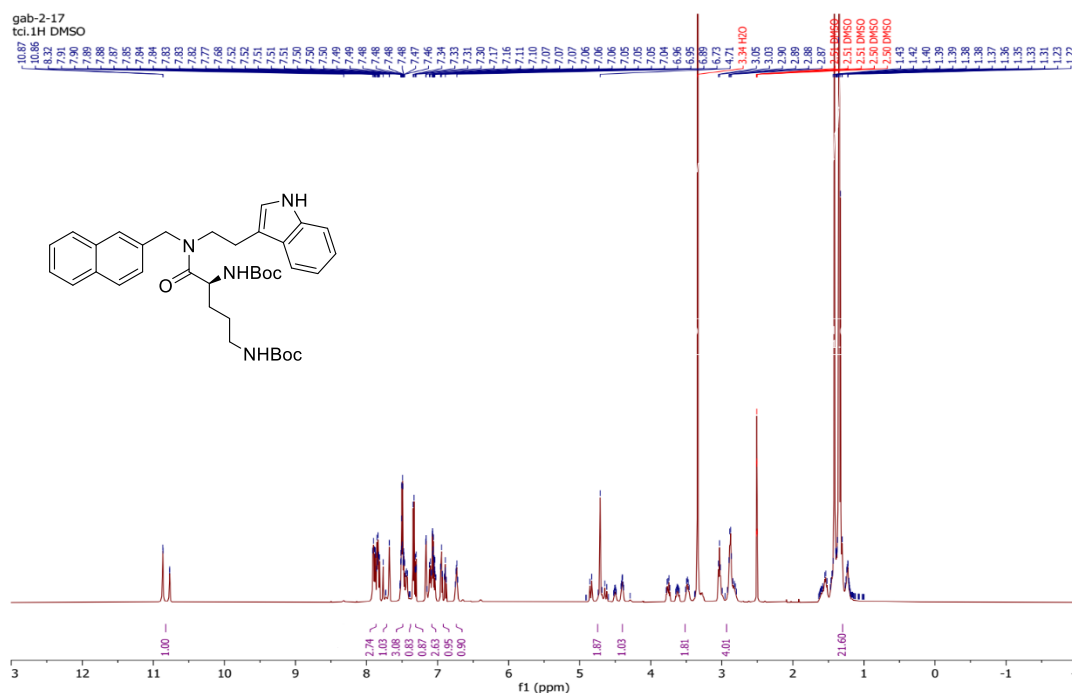

#### 46. Compound **18a** -<sup>13</sup>CNMR

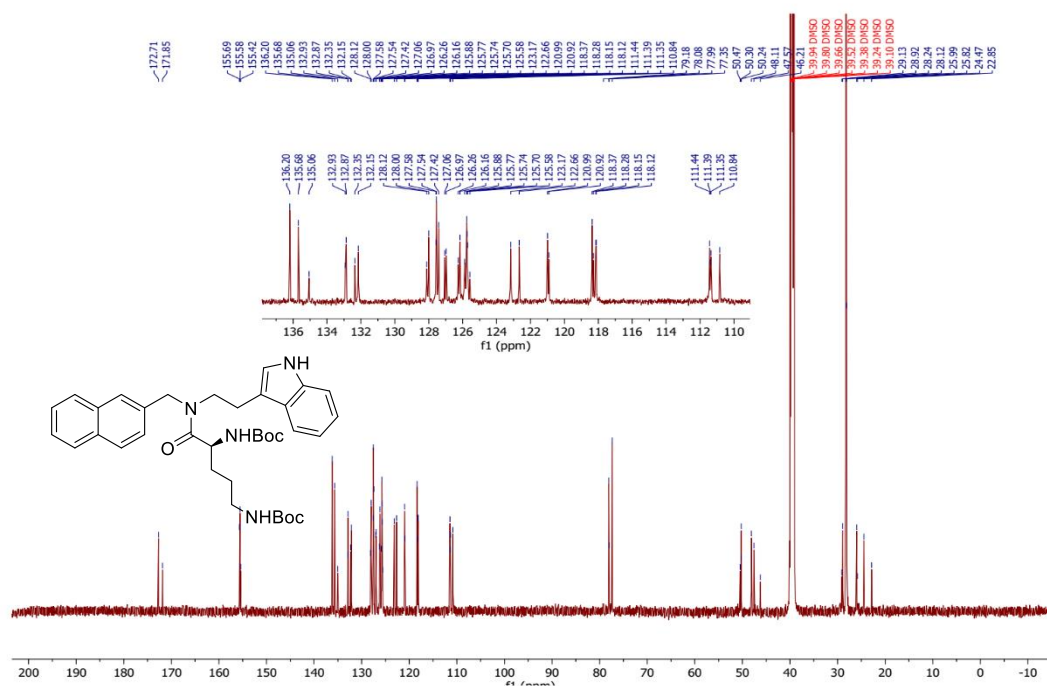

47. Compound **18a** -<sup>13</sup>CNMR dept 135

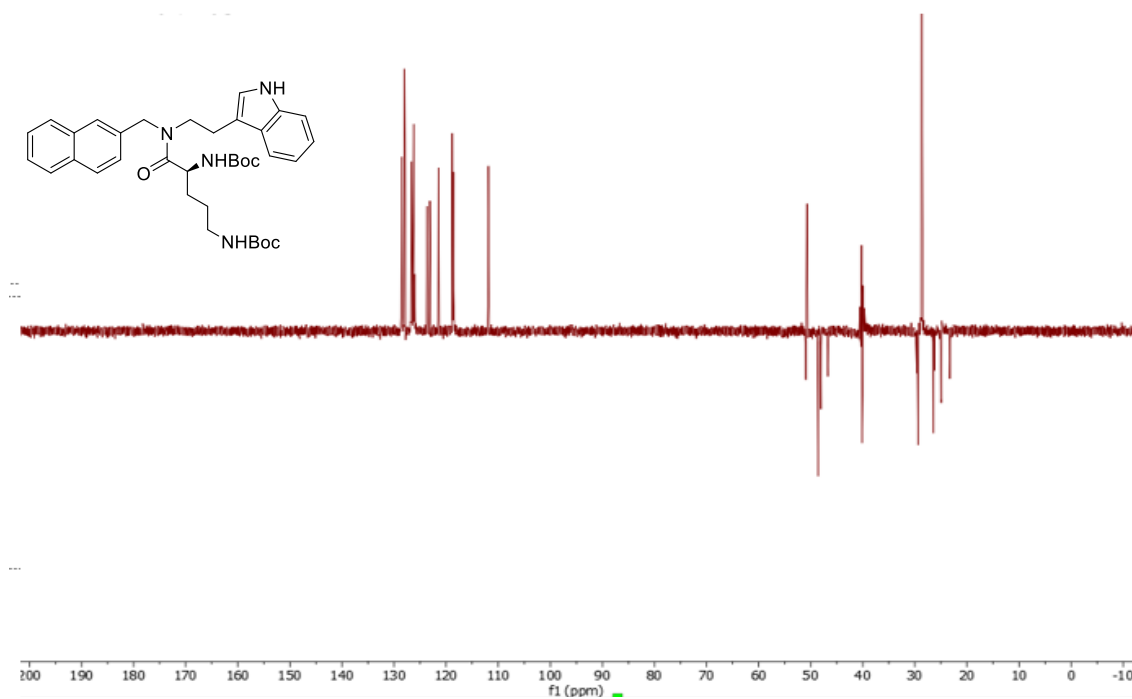

48. Compound **18a** - HSQC

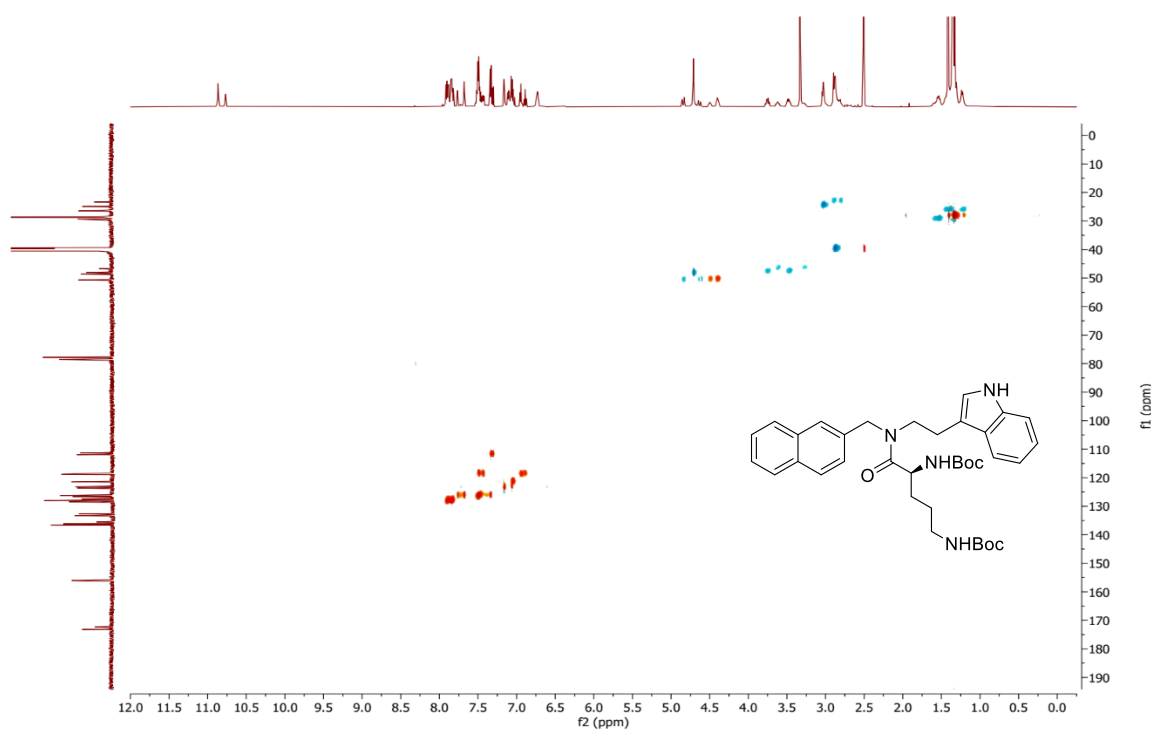

49. Compound **21** -<sup>1</sup>H NMR

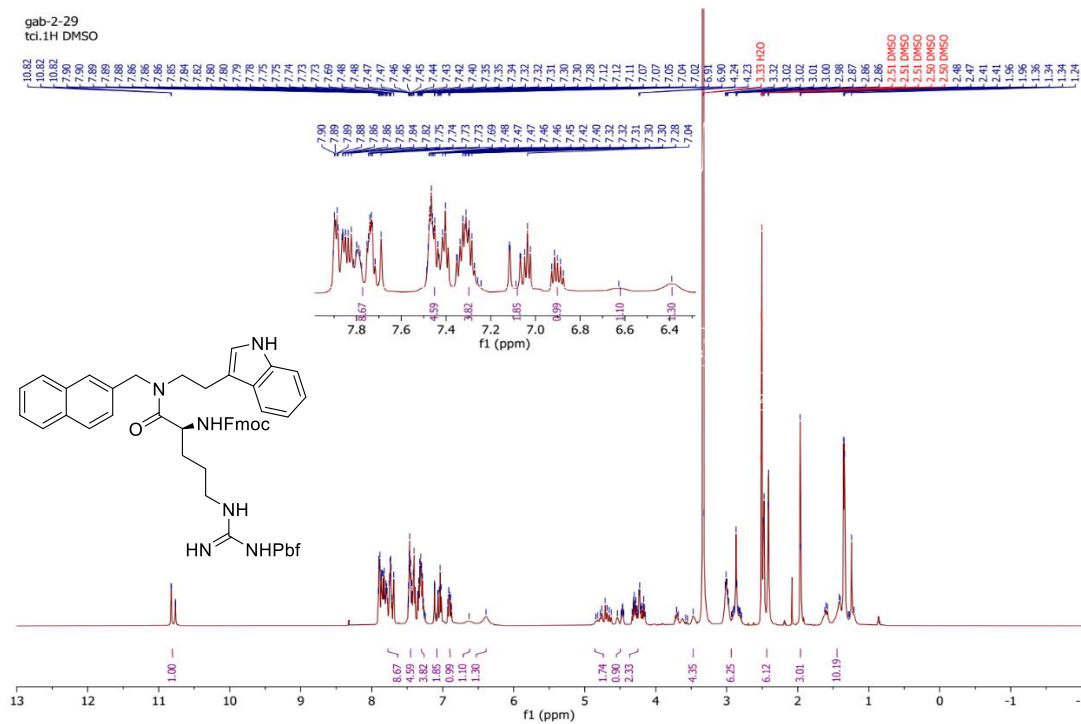



51. Compound **21** -  $^{13}\text{C}$ NMR dept 135

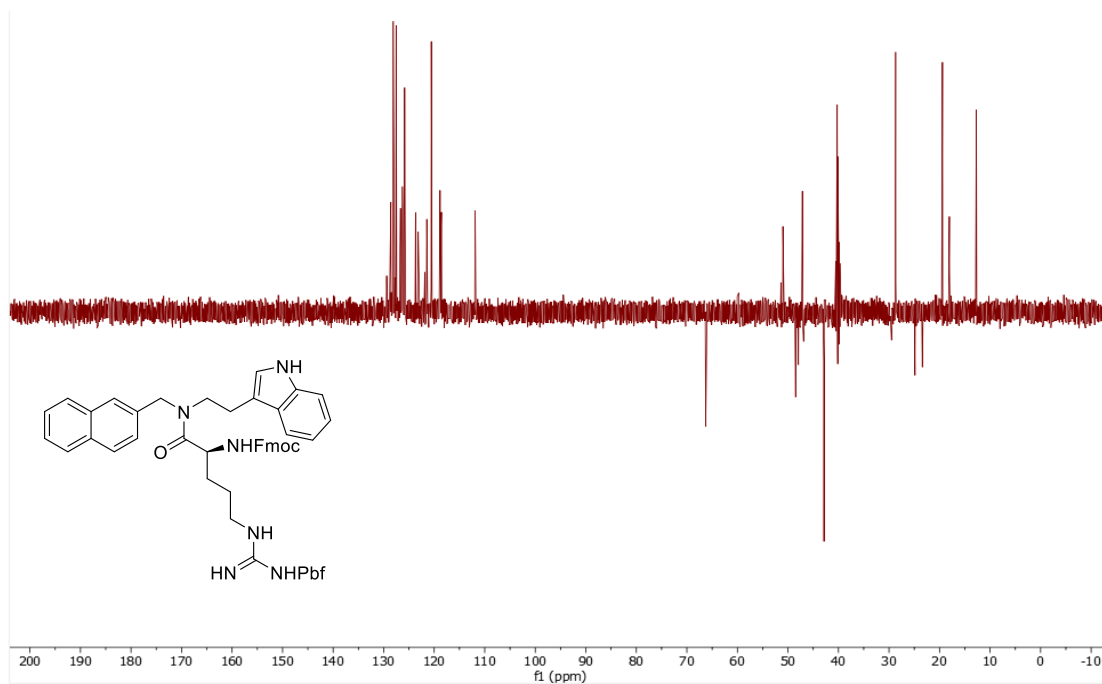

52. Compound **21** - HSQC

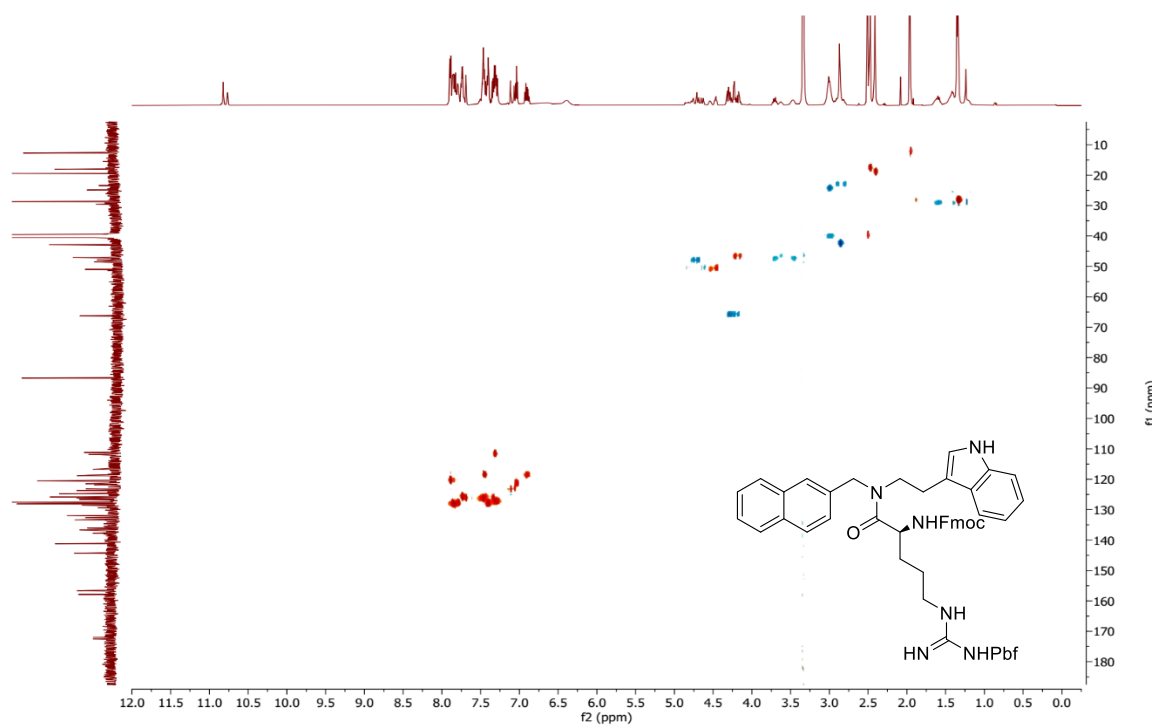

### 8- $^1\text{H}$ , and $^{13}\text{C}$ NMR of mono-amine naphthyl-indole and naphthyl-phenyl based peptoids

53. Compound **12a** -  $^1\text{H}$ NMR

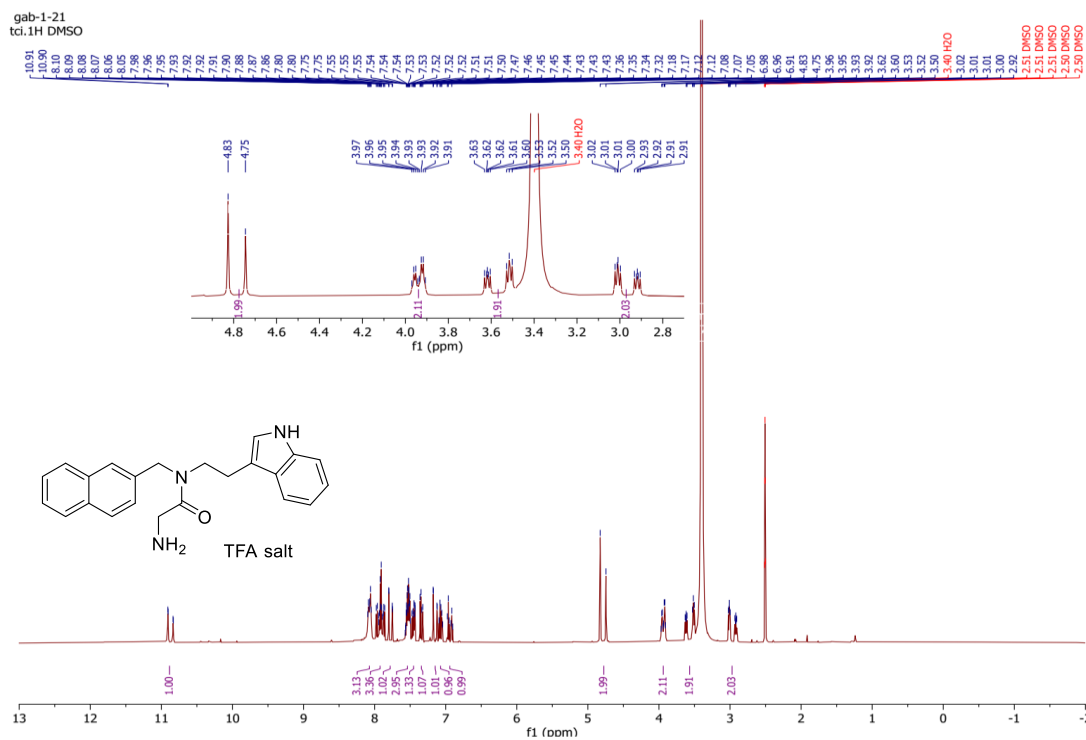

#### 54. Compound **12a** -<sup>13</sup>CNMR

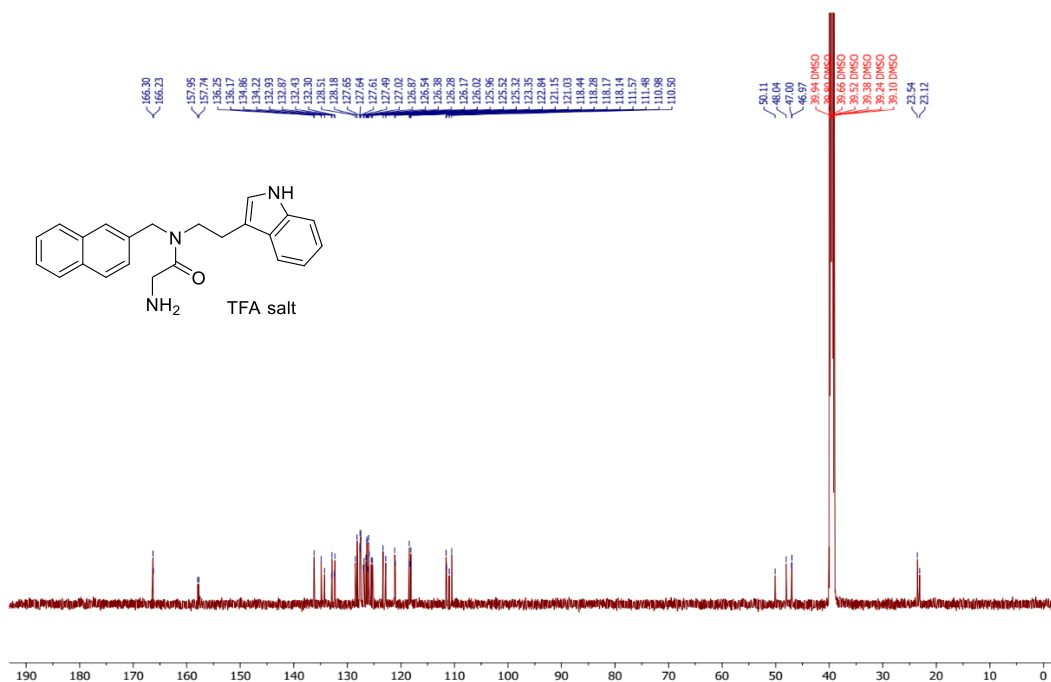

55. Compound **12a** -<sup>13</sup>CNMR dept 135

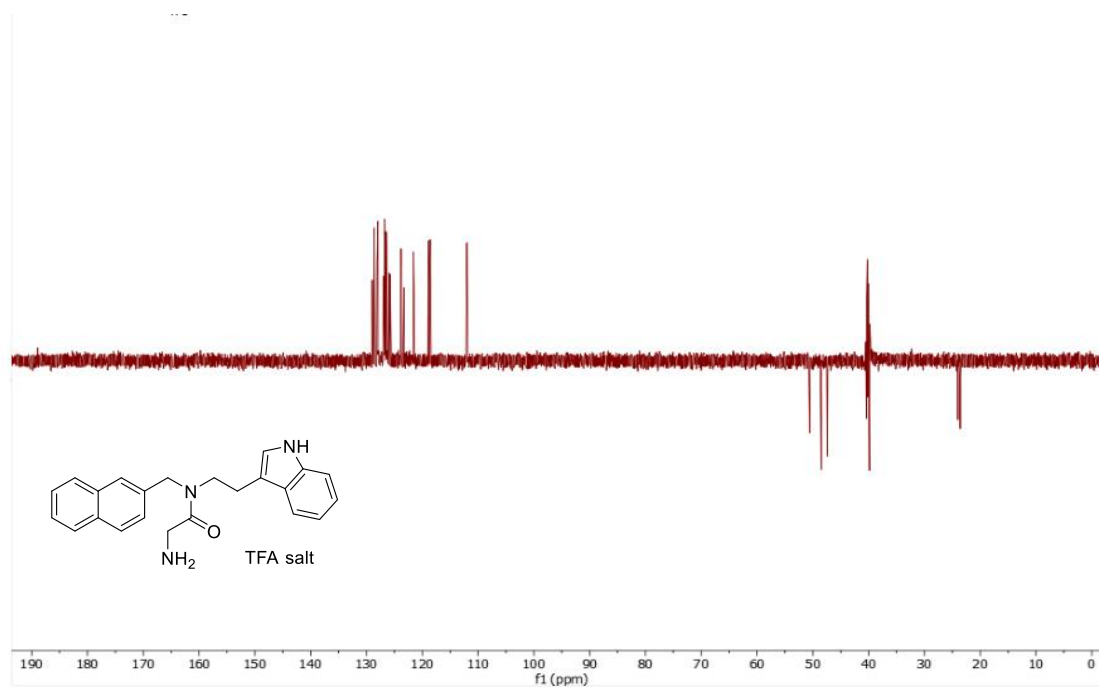

56. Compound **12a** -HSQC

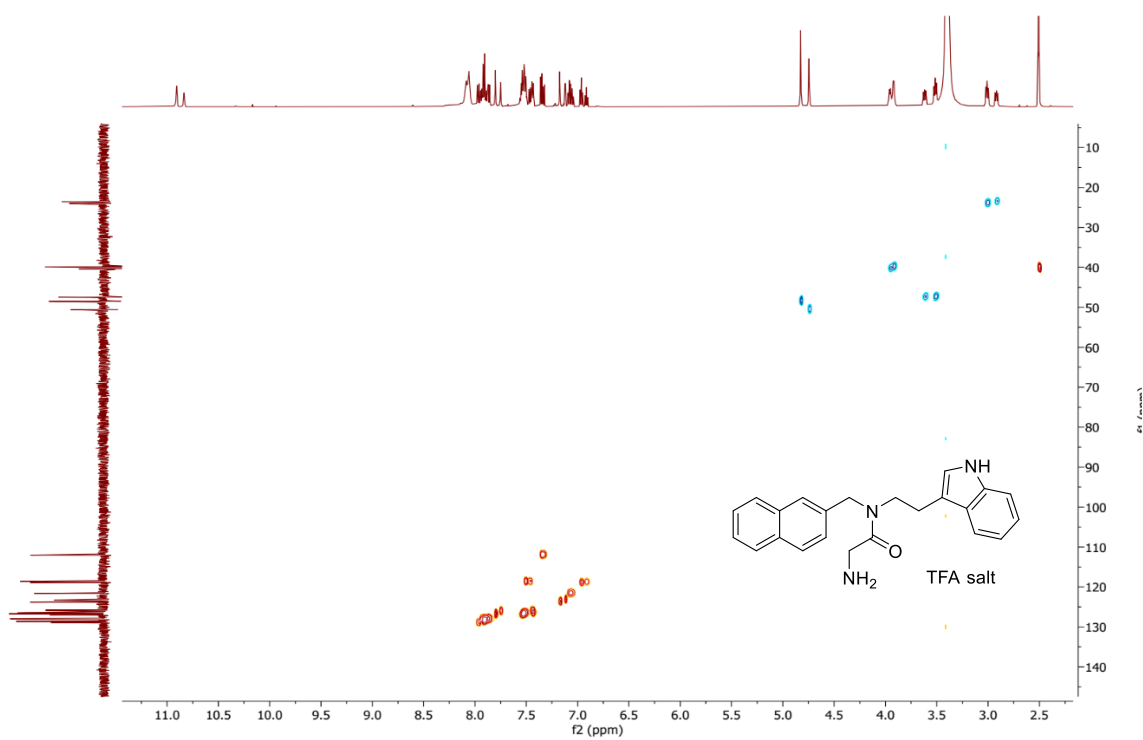

57. Compound **12b** -<sup>1</sup>H NMR

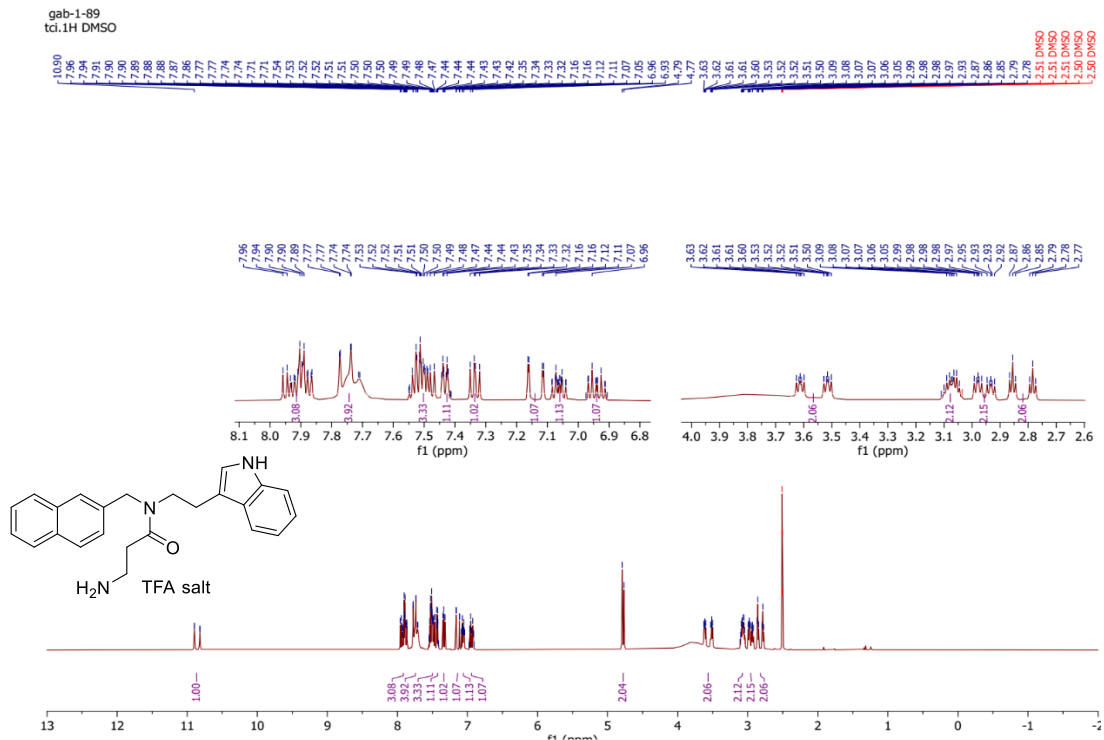

58. Compound **12b** -<sup>13</sup>C NMR

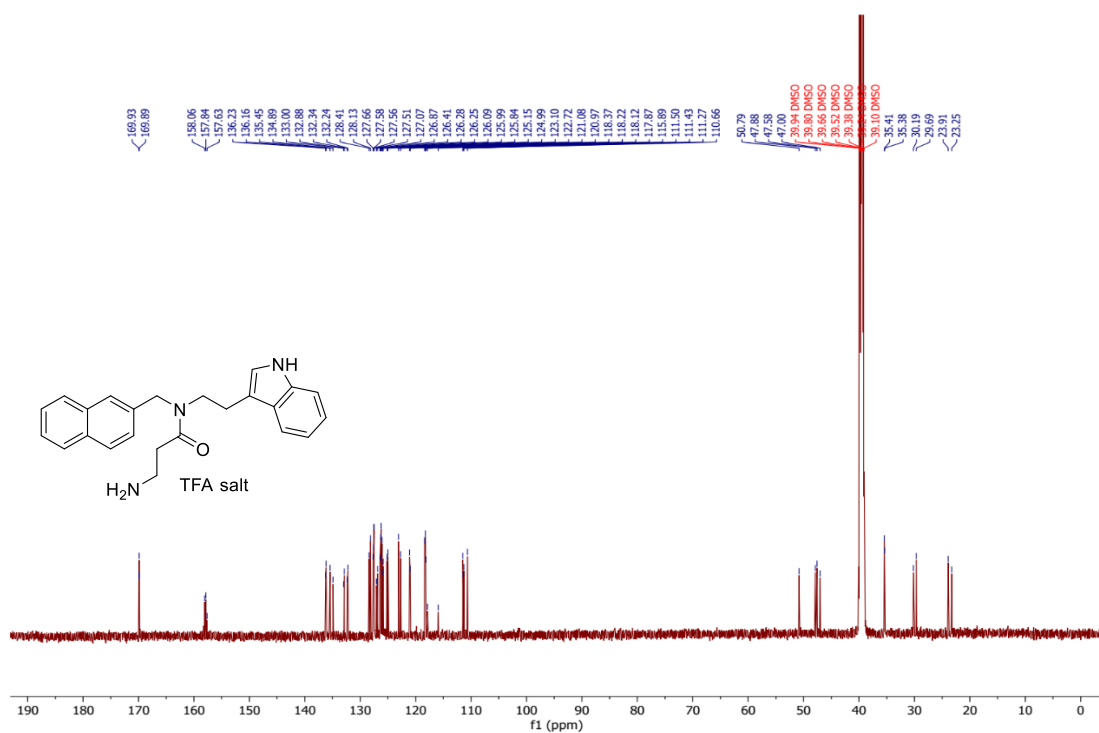

59. Compound **12b**-<sup>13</sup>CNMR dept 135

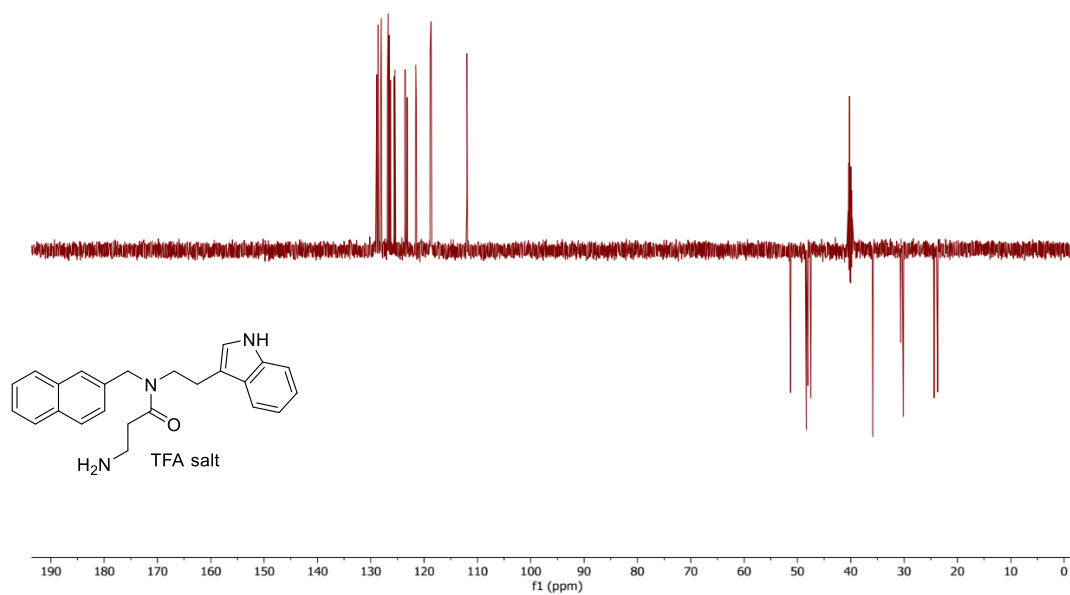

60. Compound **12b**-HSQC

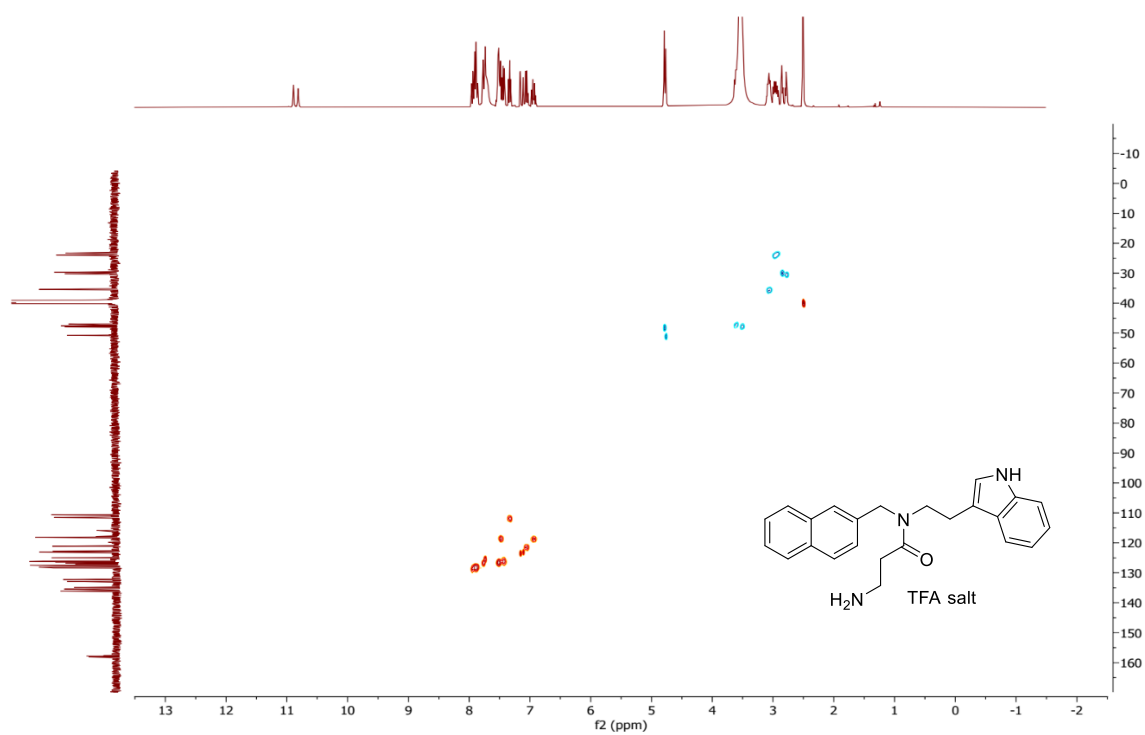

### 61. Compound **12c**- <sup>1</sup>HNMR

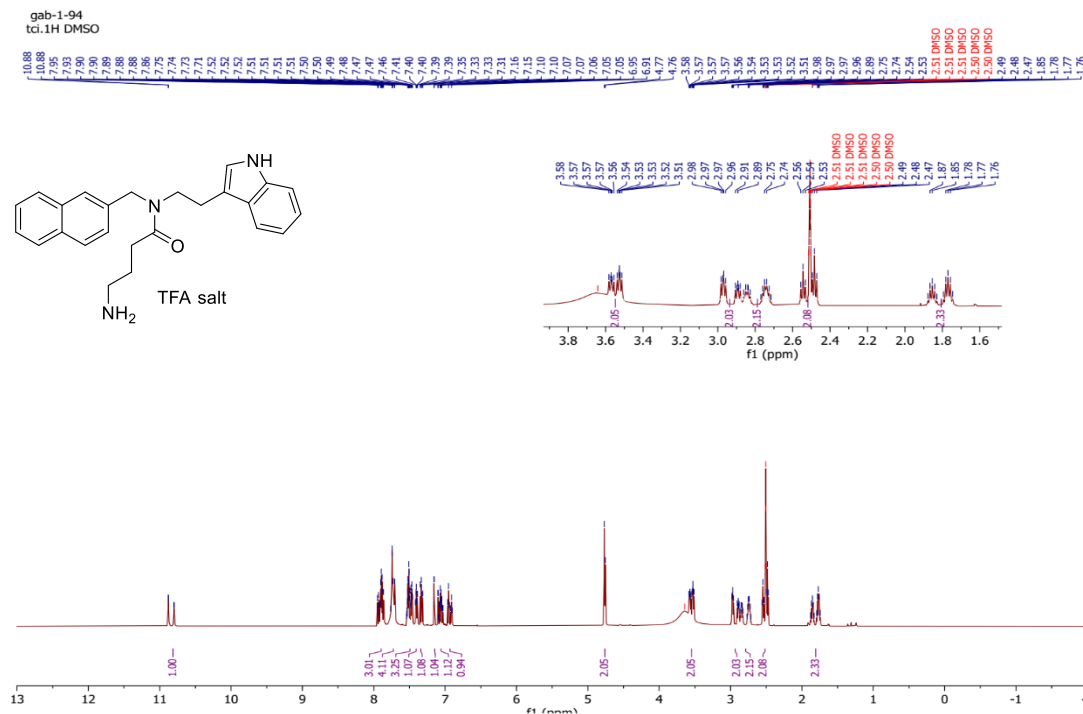

## 62. Compound **12c**- $^{13}\text{C}$ NMR

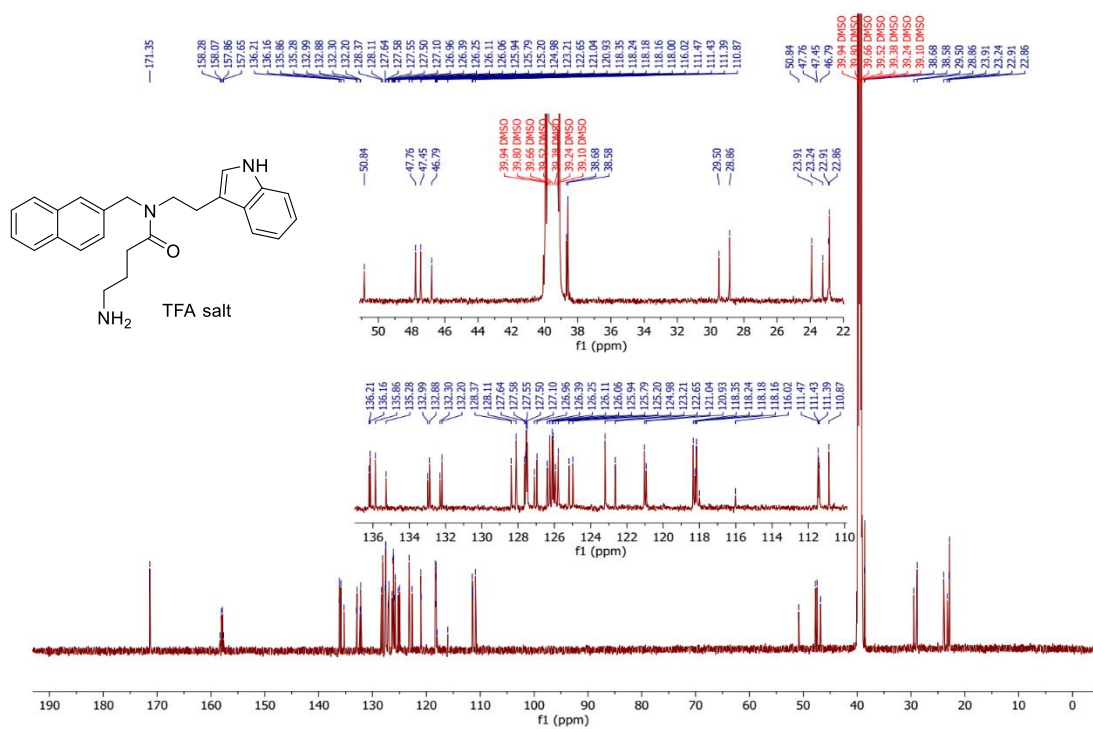

63. Compound **12c**-  $^{13}\text{C}$ NMR dept 135

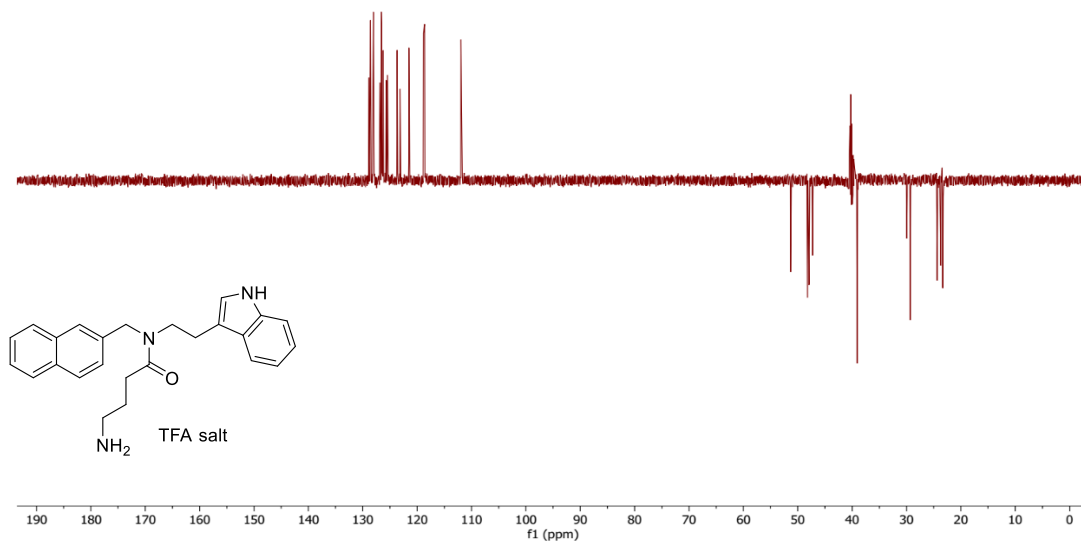

64. Compound **12c**- HSQC

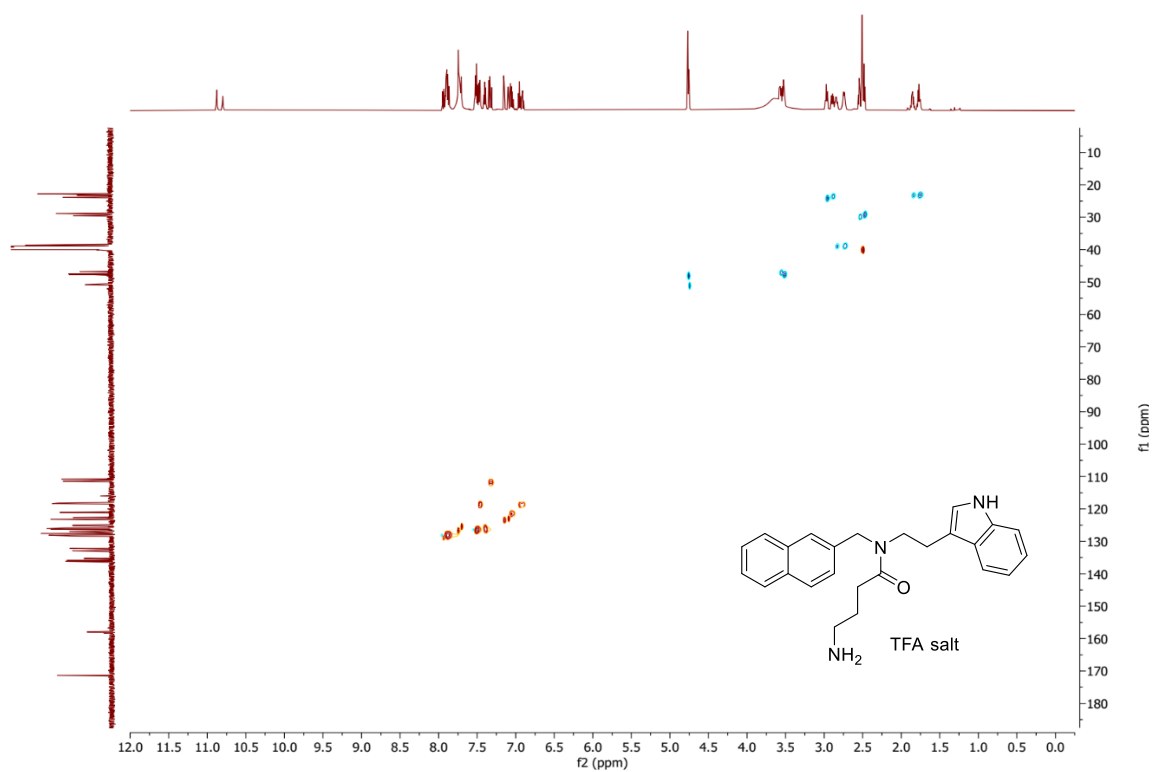

### 65. Compound **12d**- <sup>1</sup>H NMR

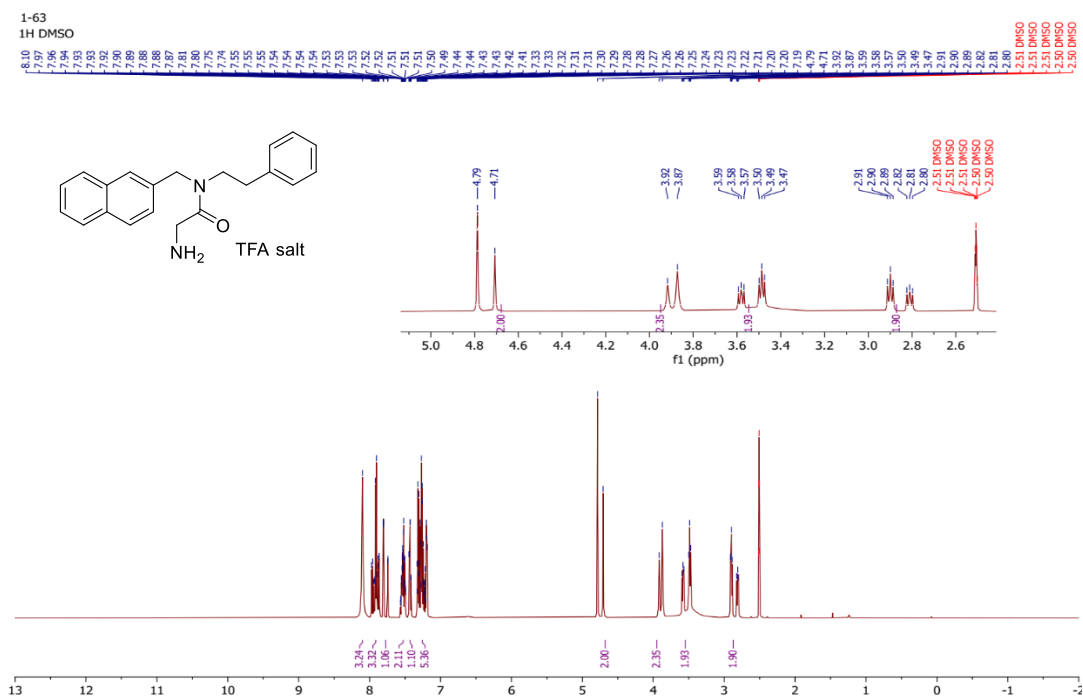

#### 66. Compound **12d**- $^{13}\text{C}$ NMR

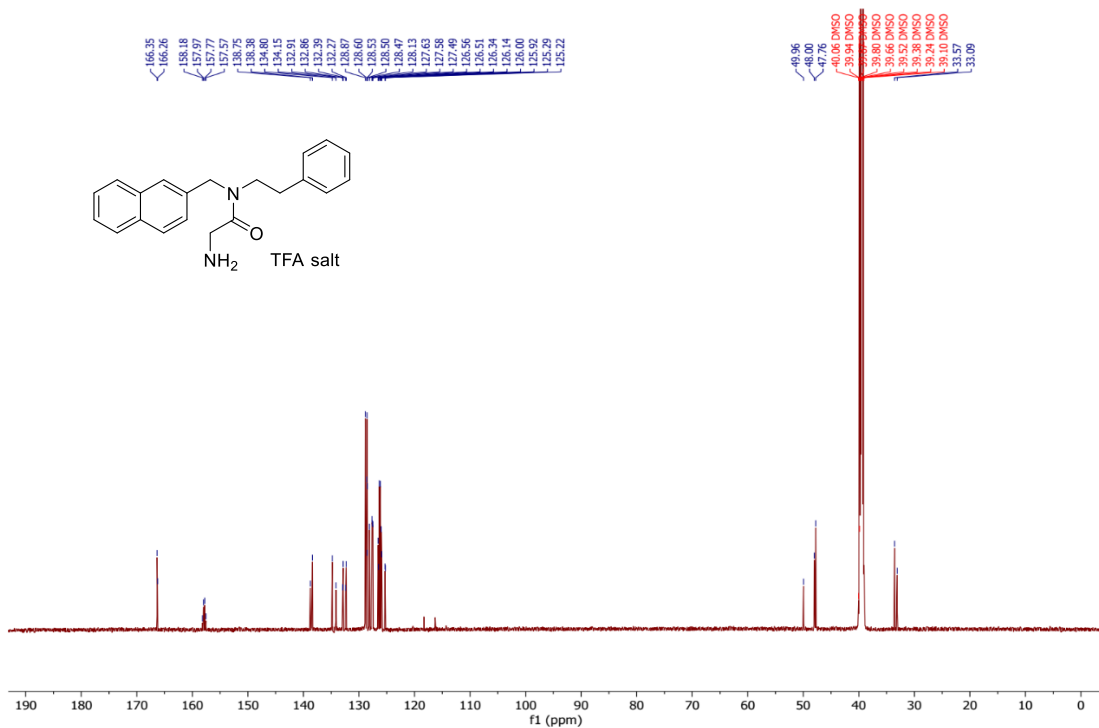



67. Compound **12d**-  $^{13}\text{C}$ NMR dept 135

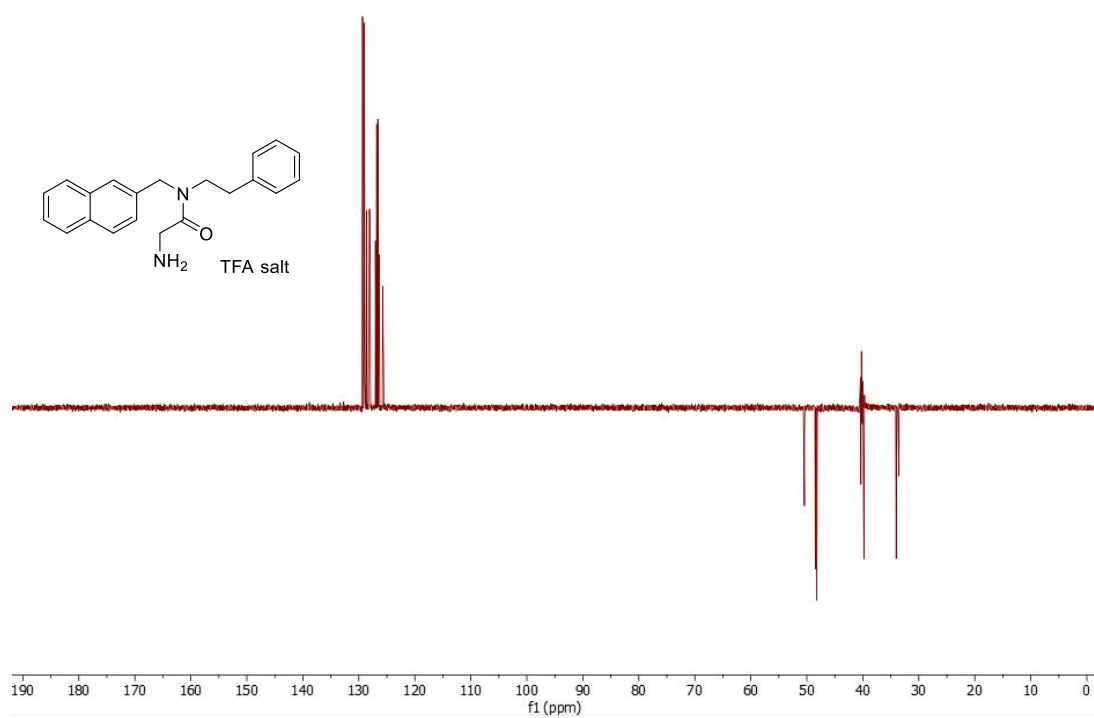

68. Compound **12d**- HSQC

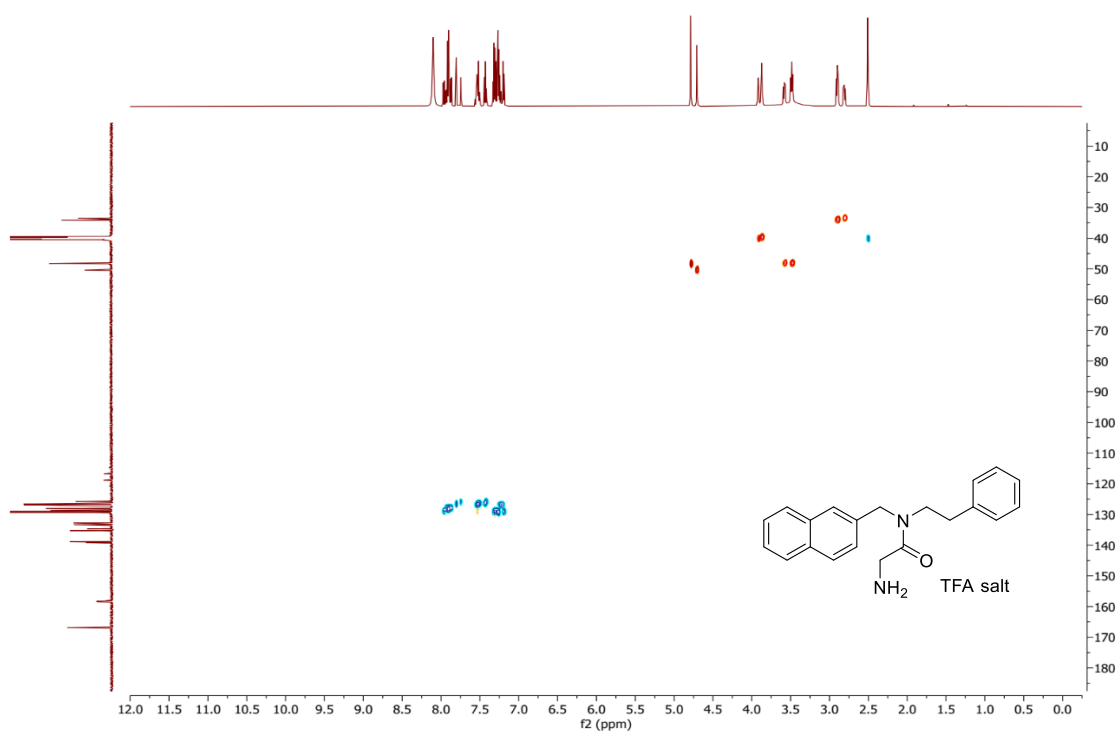

69. Compound **12e**-  $^1\text{H}$ NMR

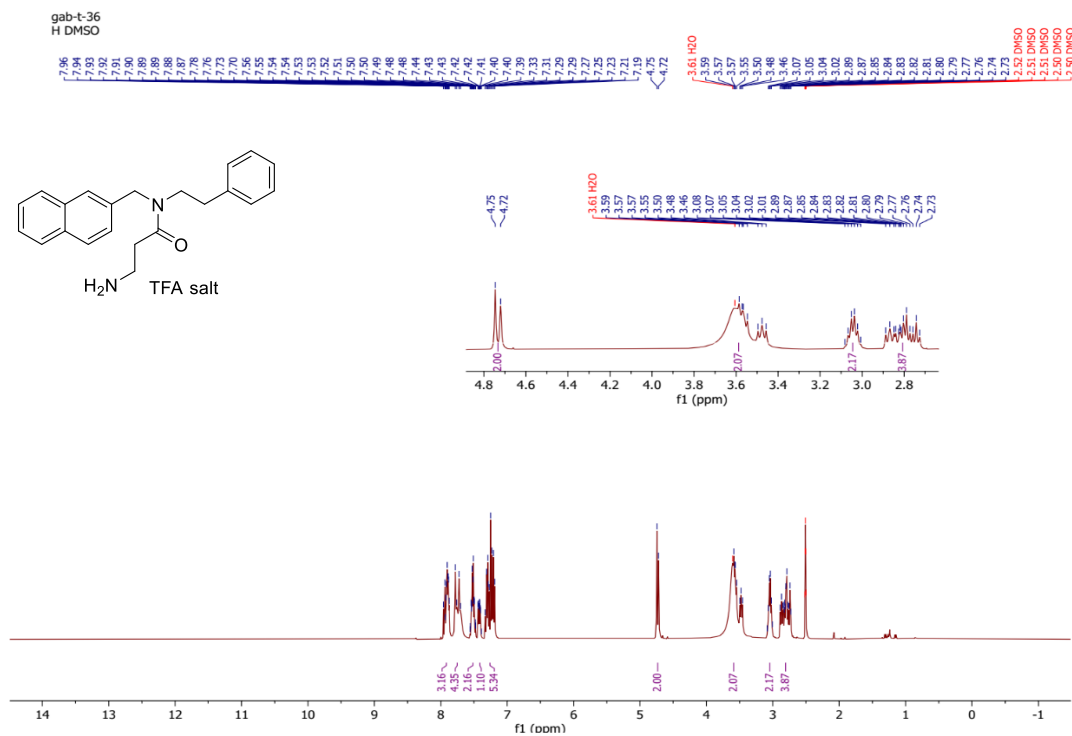

70. Compound **12e**-  $^{13}\text{C}$ NMR

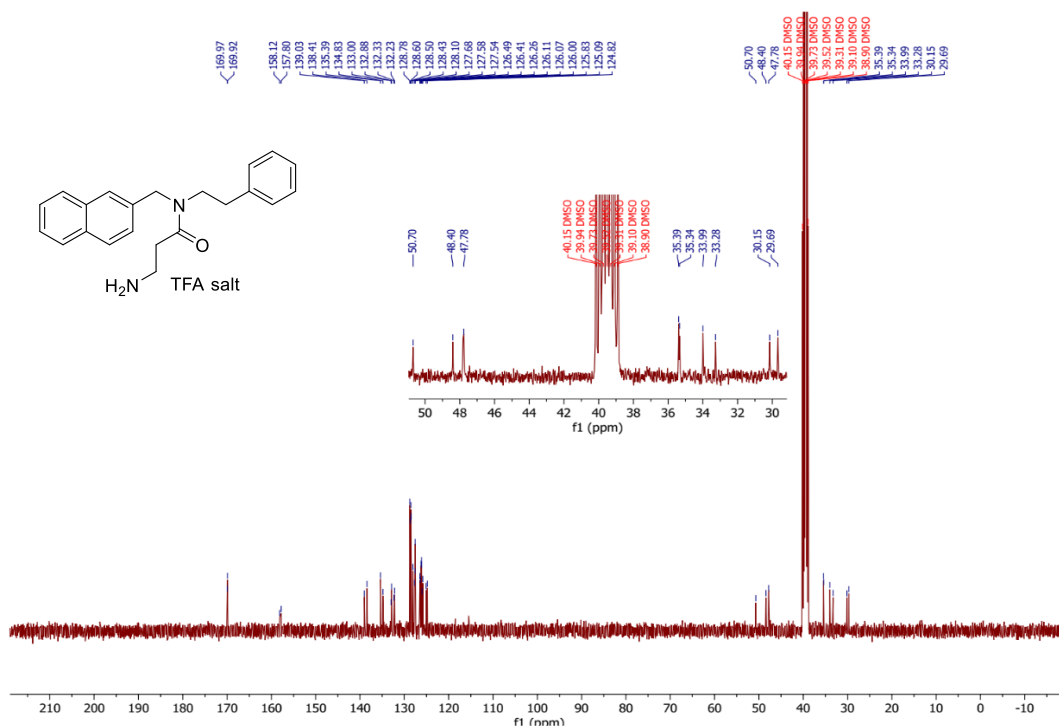

71. Compound **12e**-  $^{13}\text{C}$ NMR dept 135

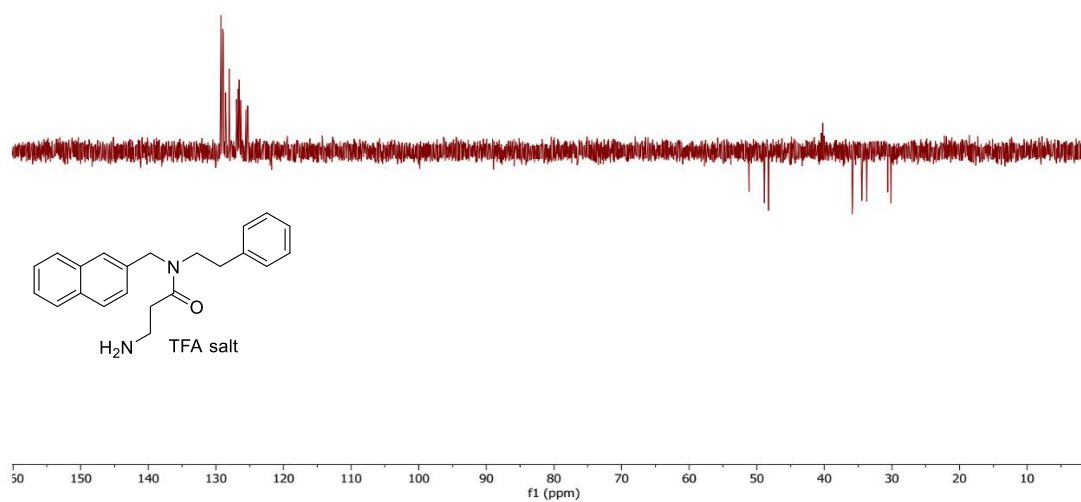

72. Compound **12e**- HSQC

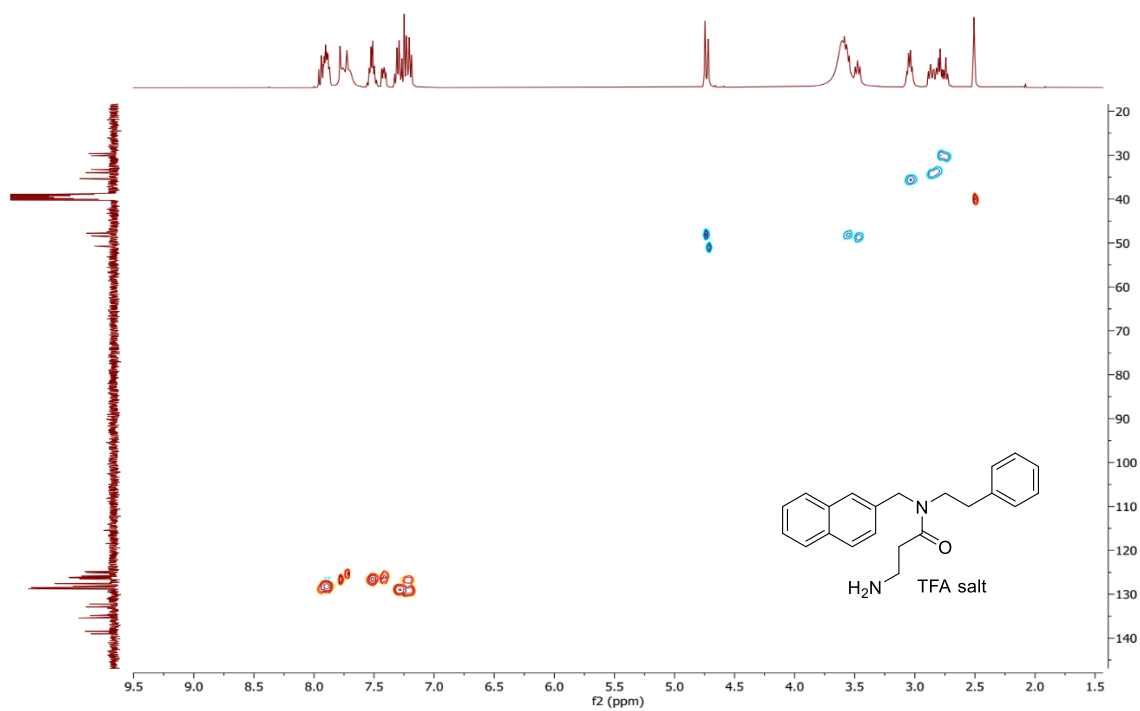

73. Compound **12f**-  $^1\text{H}$ NMR

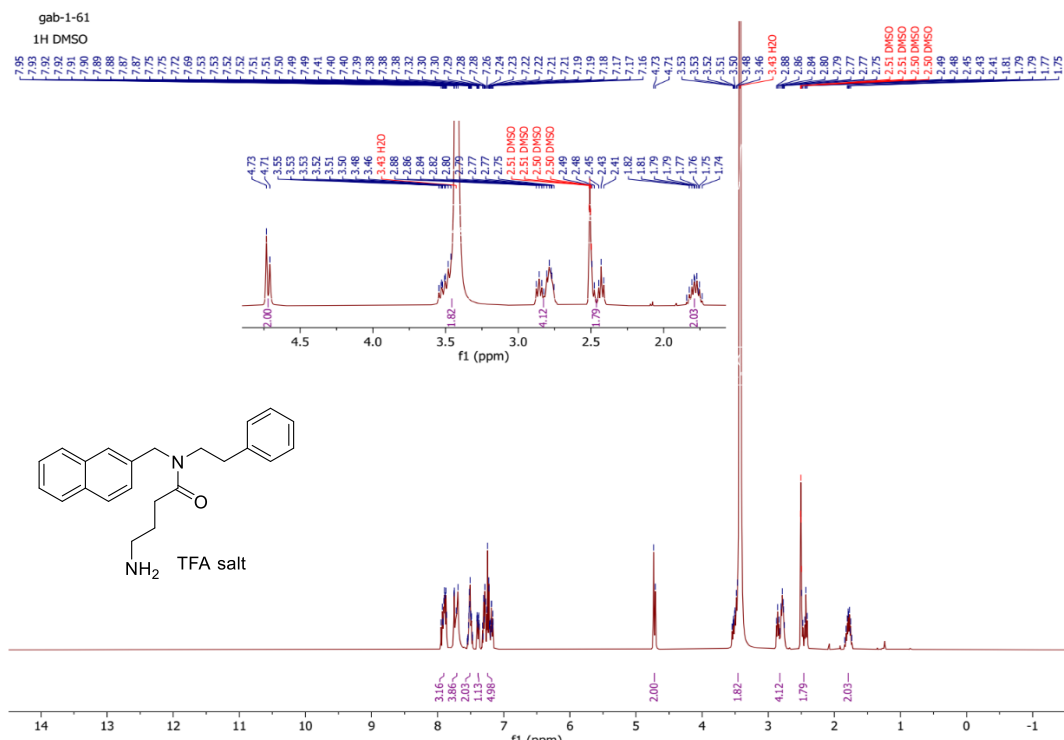

74. Compound **12f**-  $^{13}\text{C}$ NMR

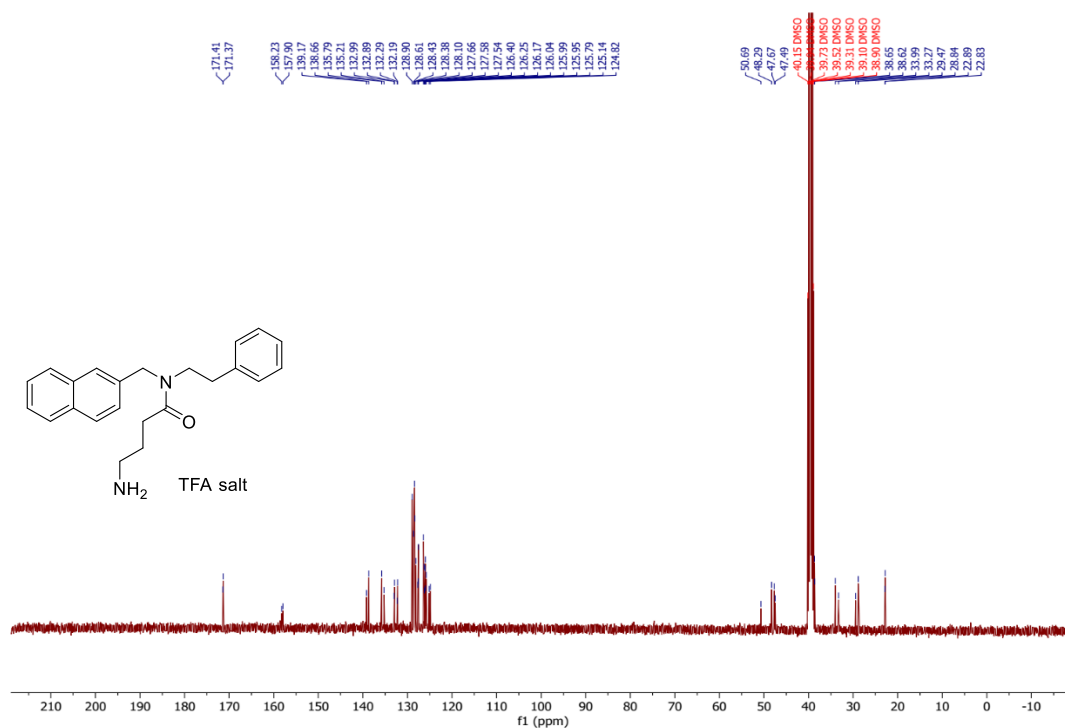

75. Compound **12f**-  $^{13}\text{C}$ NMR dept 135

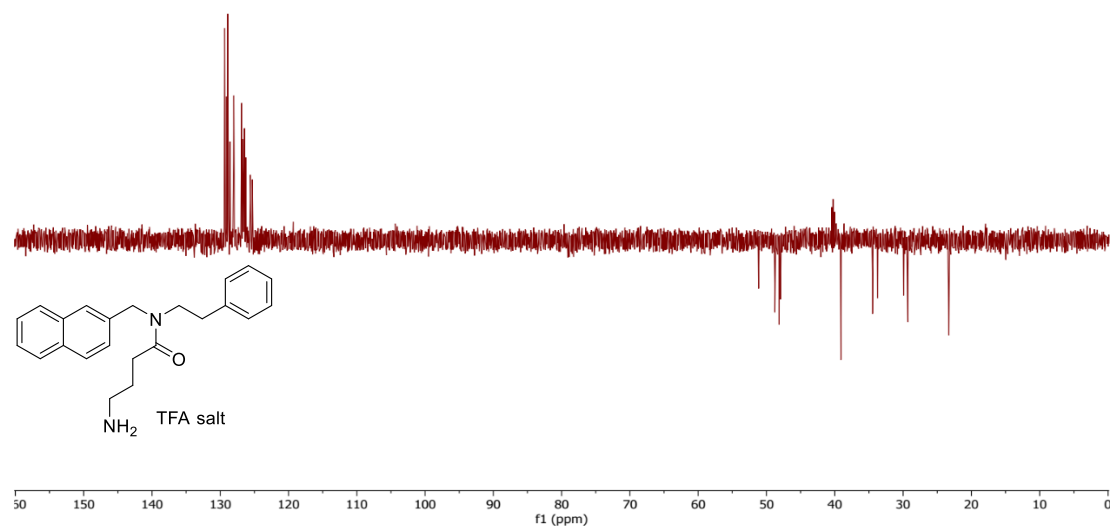

76. Compound **12f**- HSQC

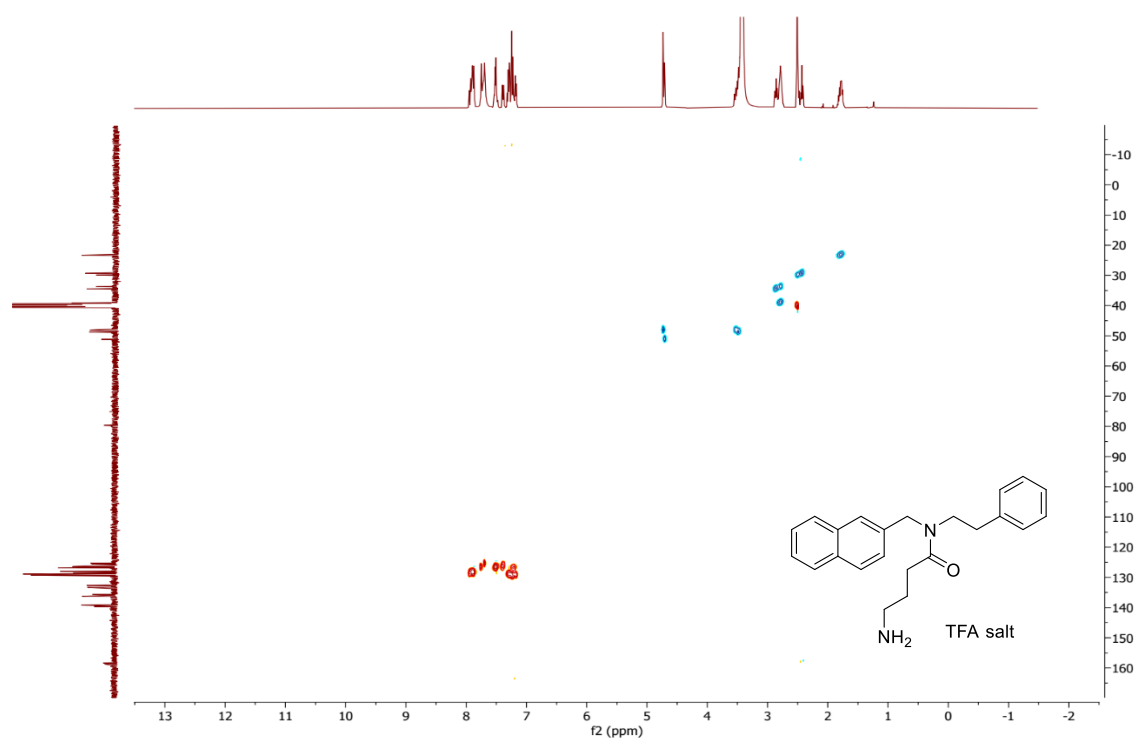

77. Compound **26**-  $^1\text{H}$ NMR

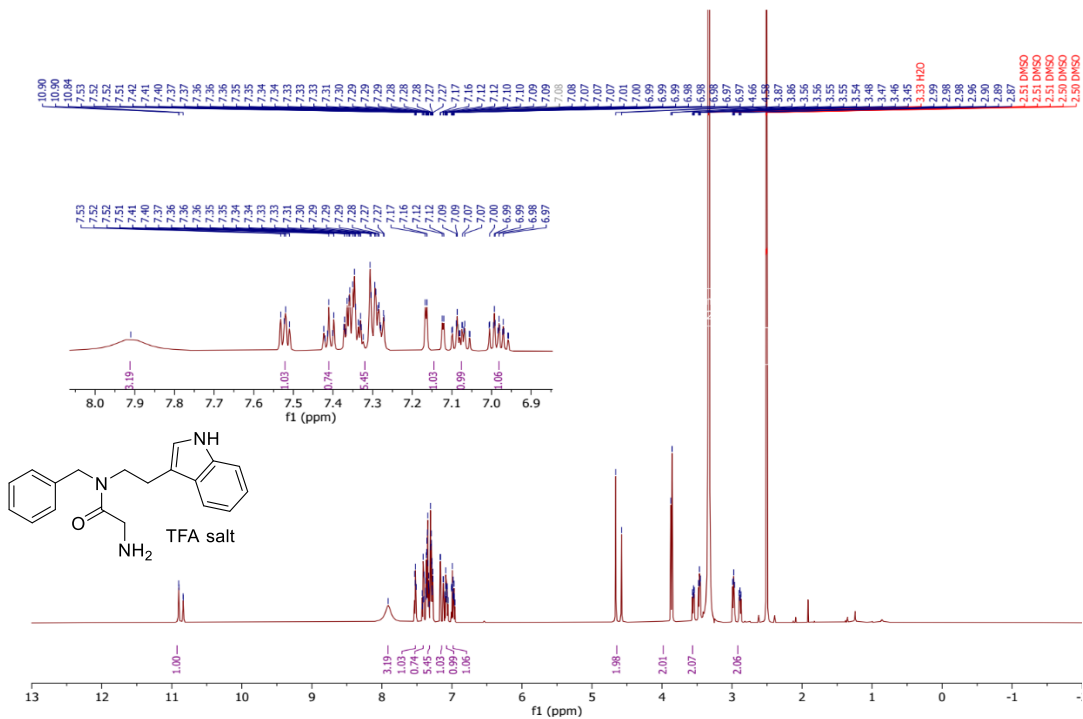

78. Compound **26**-  $^{13}\text{C}$ NMR

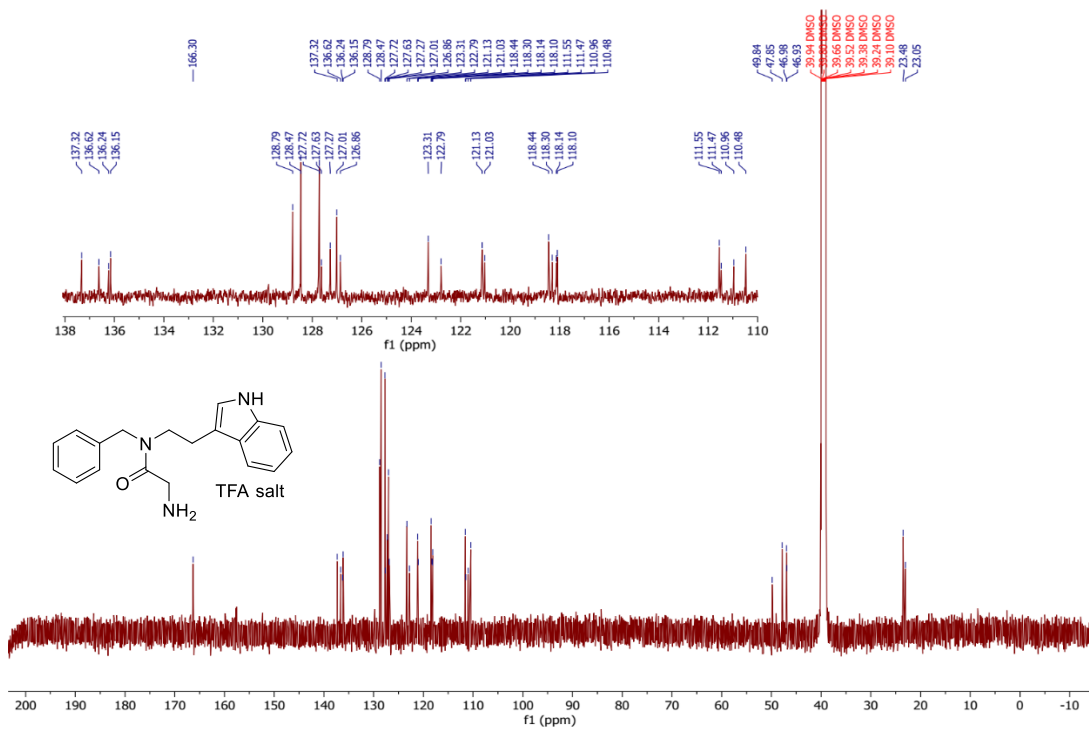

79. Compound **26**-  $^{13}\text{C}$ NMR dept 135

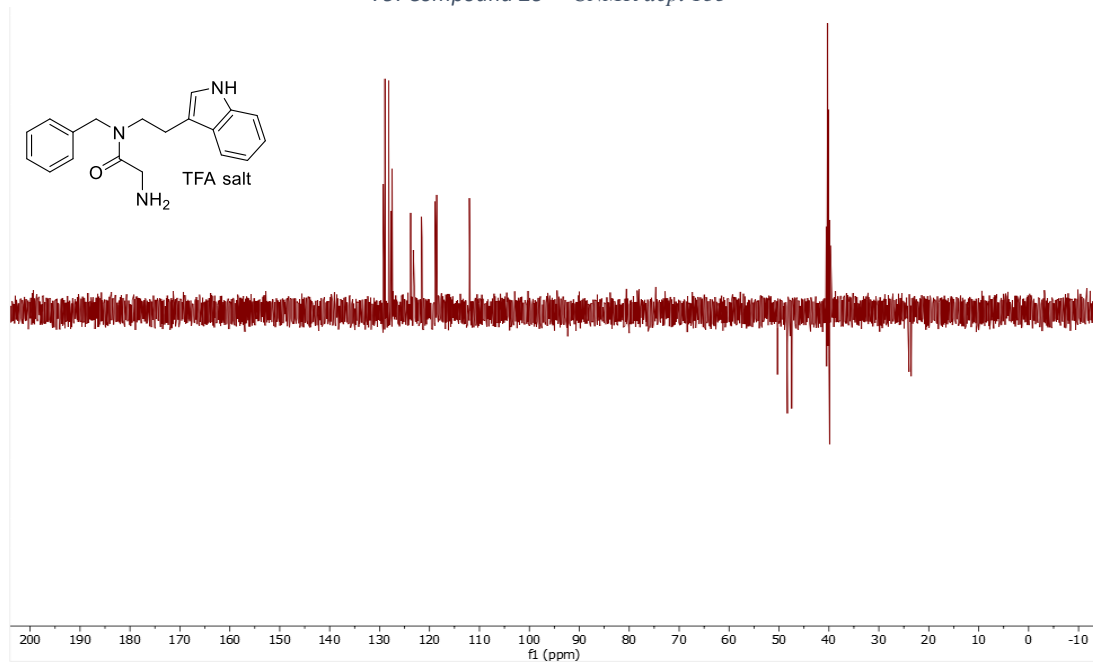

80. Compound **26**- HSQC

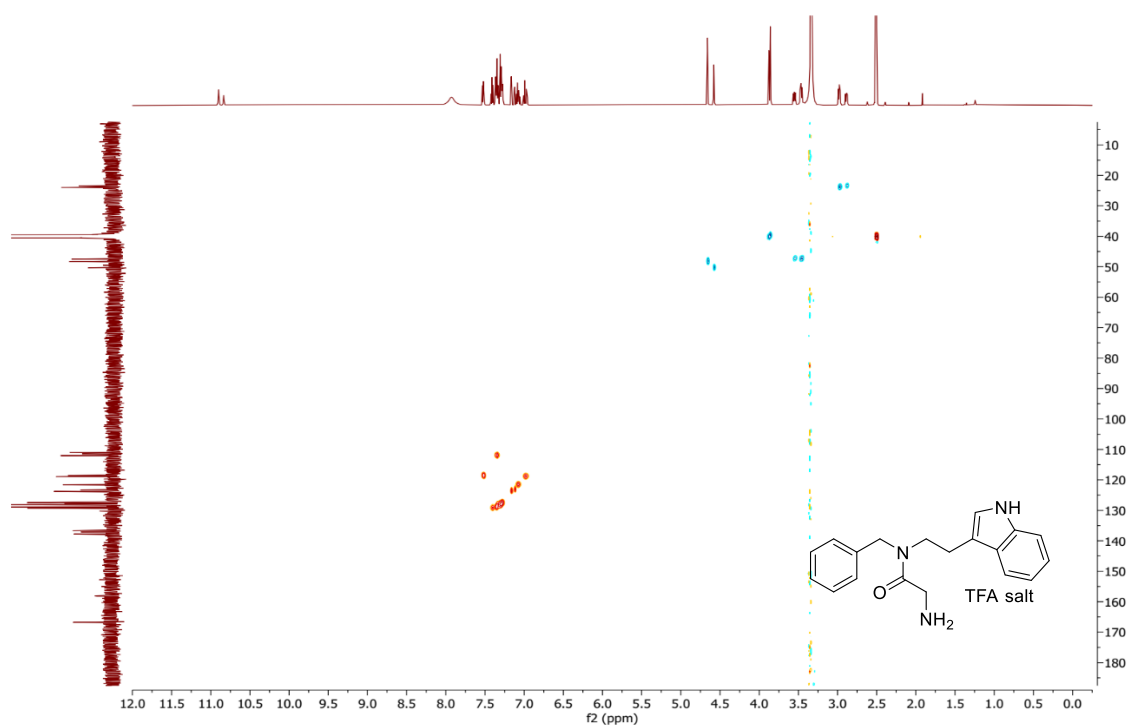

### 9- $^1\text{H}$ , and $^{13}\text{C}$ NMR of diamino-naphthyl- indole based peptoids.

### 81. Compound **19b**- <sup>1</sup>HNMR

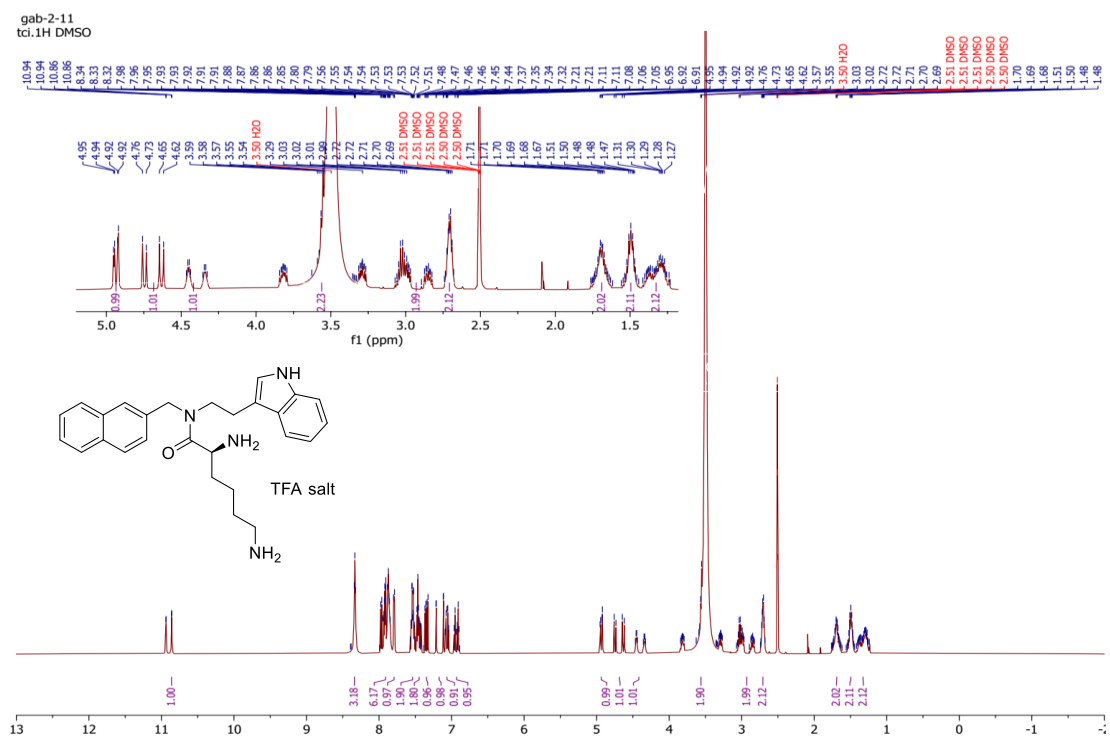

## 82. Compound **19b**- <sup>13</sup>CNMR

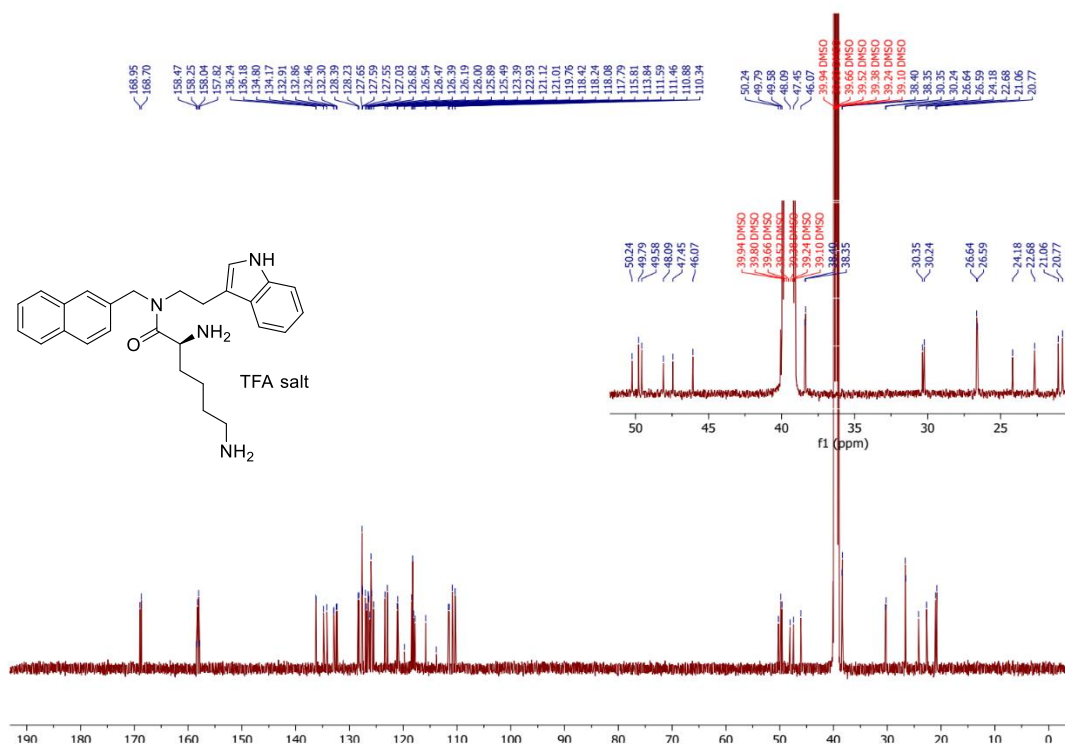



83. Compound **19b**-  $^{13}\text{C}$ NMR dept 135

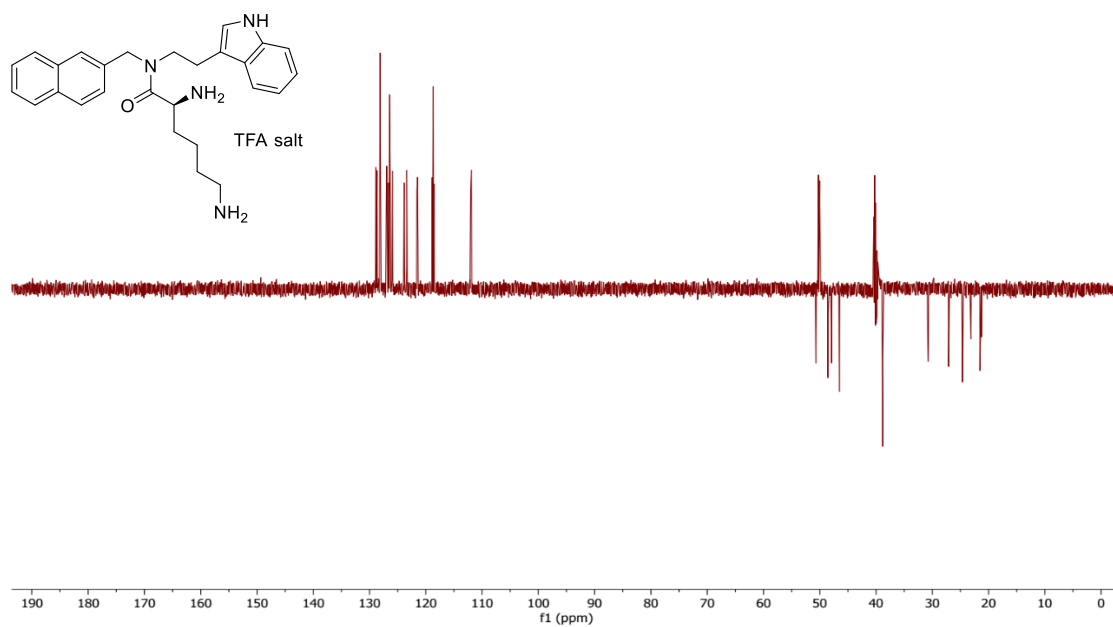

84. Compound **19b**- HSQC

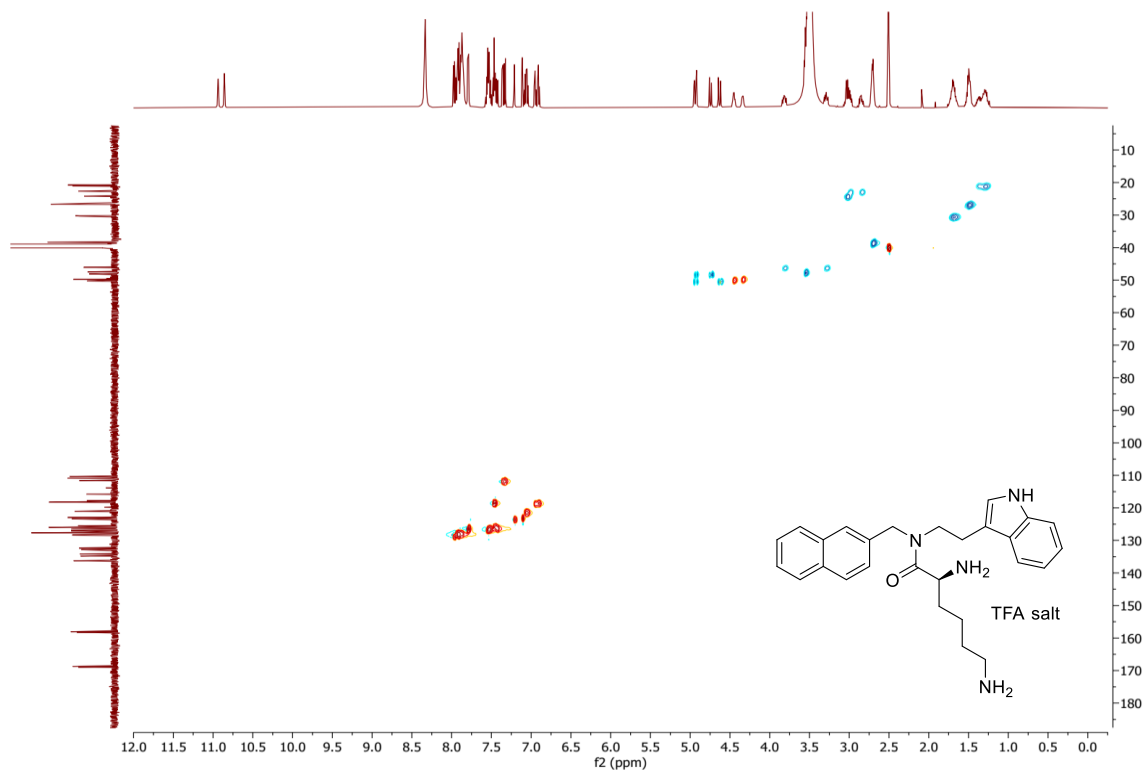

### 85. Compound **19a**- <sup>1</sup>HNMR

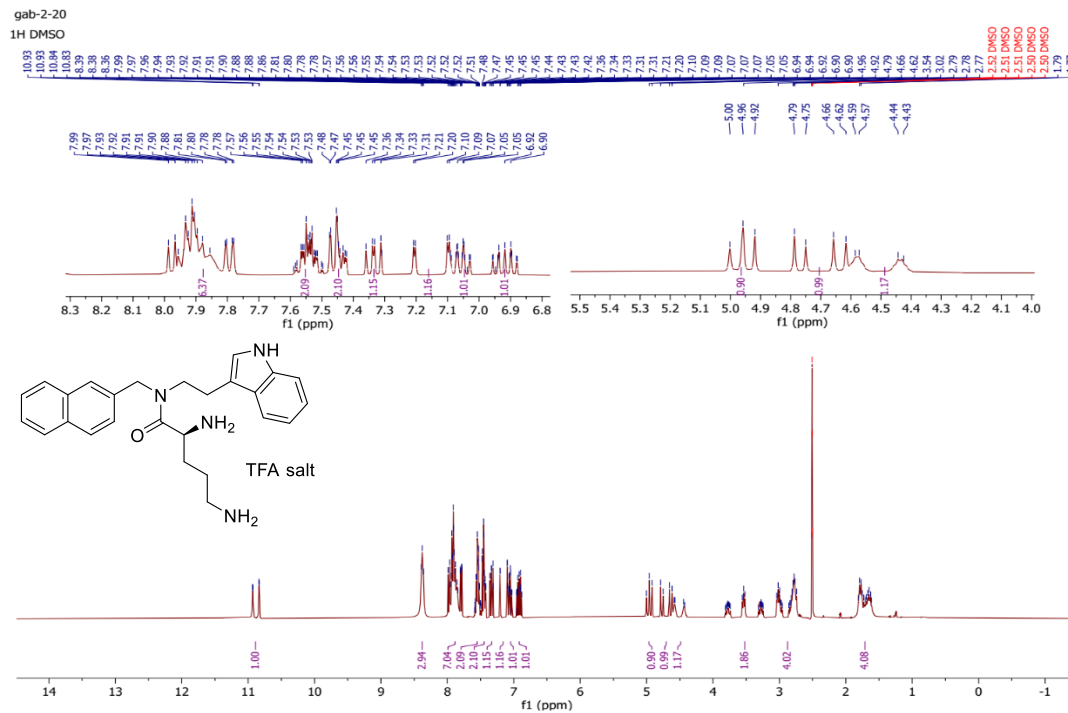

86. Compound **19a**-  $^{13}\text{C}$ NMR

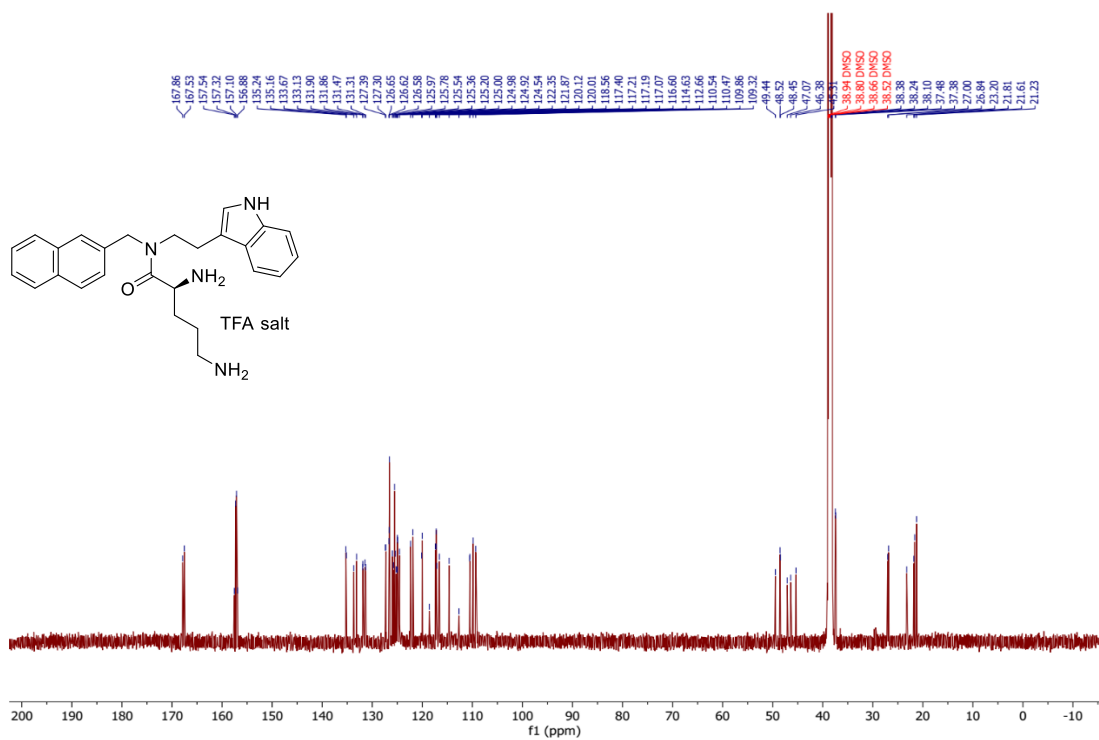

87. Compound **19a**-  $^{13}\text{C}$ NMR dept 135

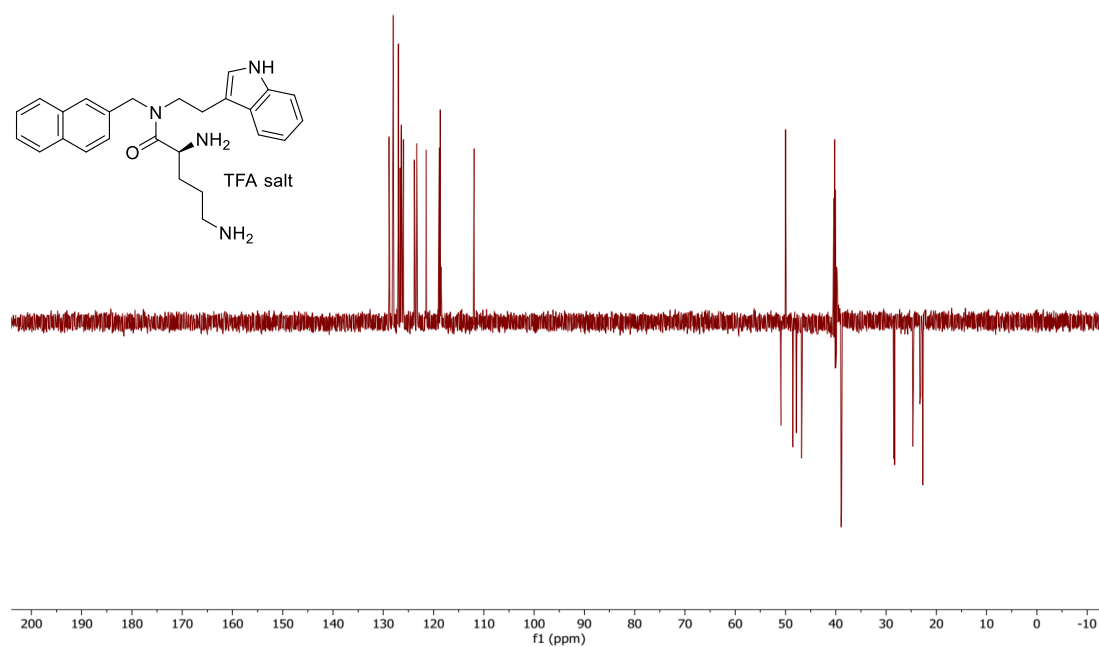

88. Compound **19a**- HSQC

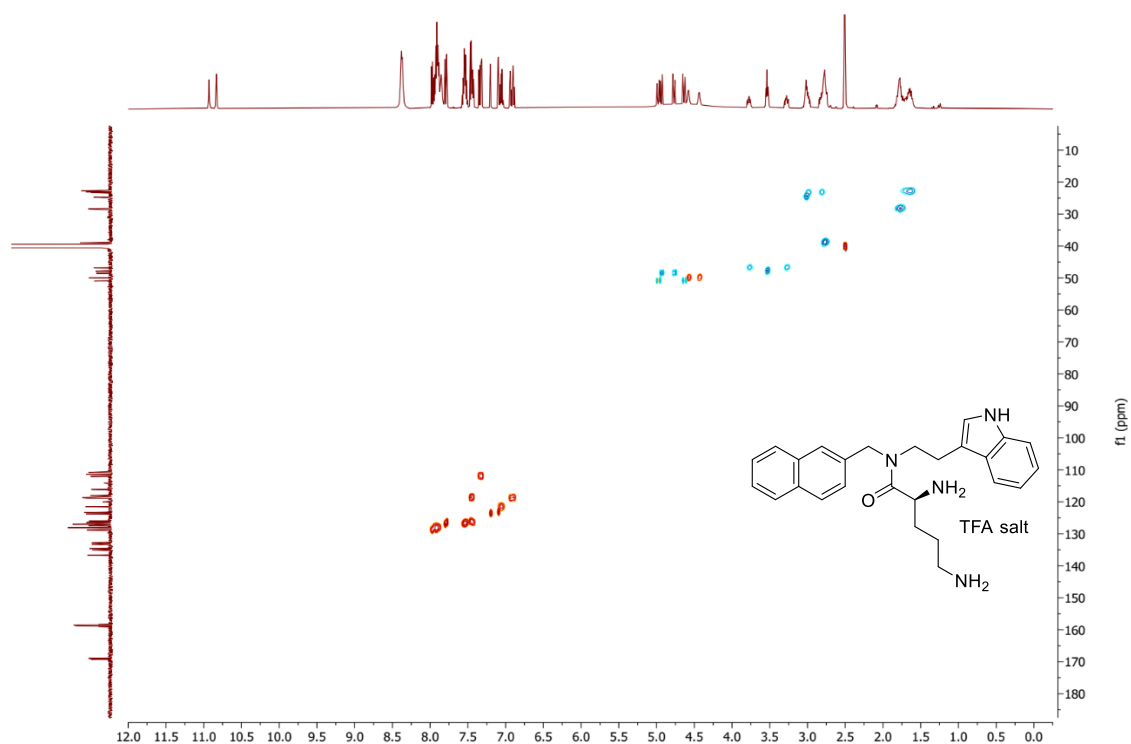

### 89. Compound **22**- $^1\text{H}$ NMR

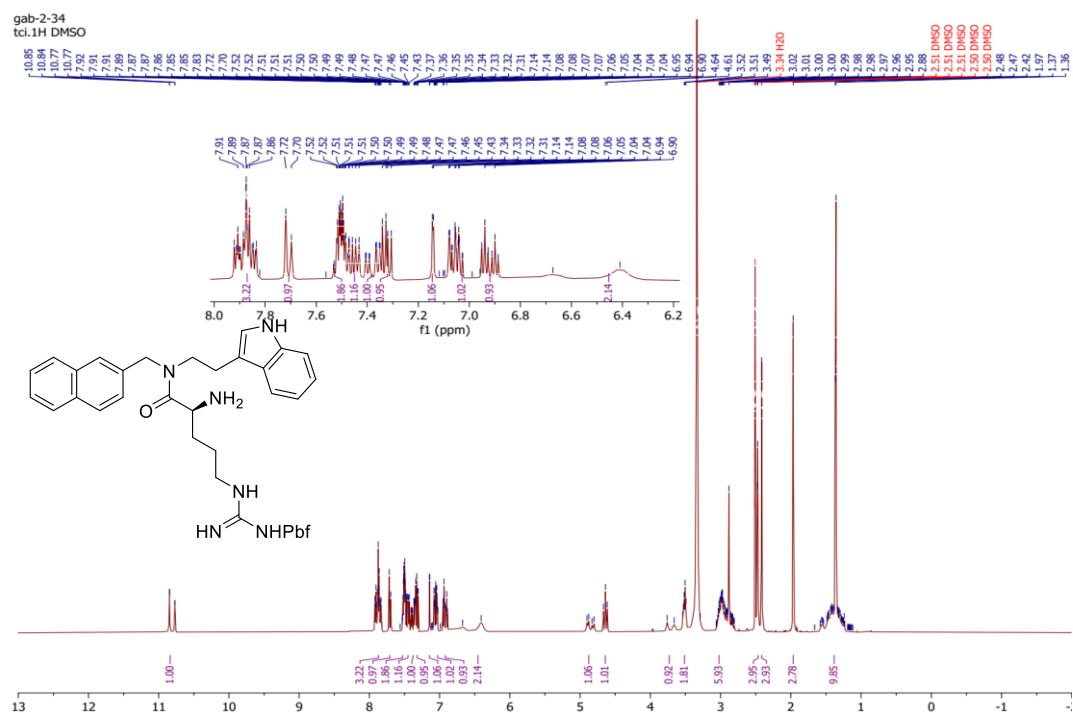

90. Compound **22**-<sup>13</sup>CNMR

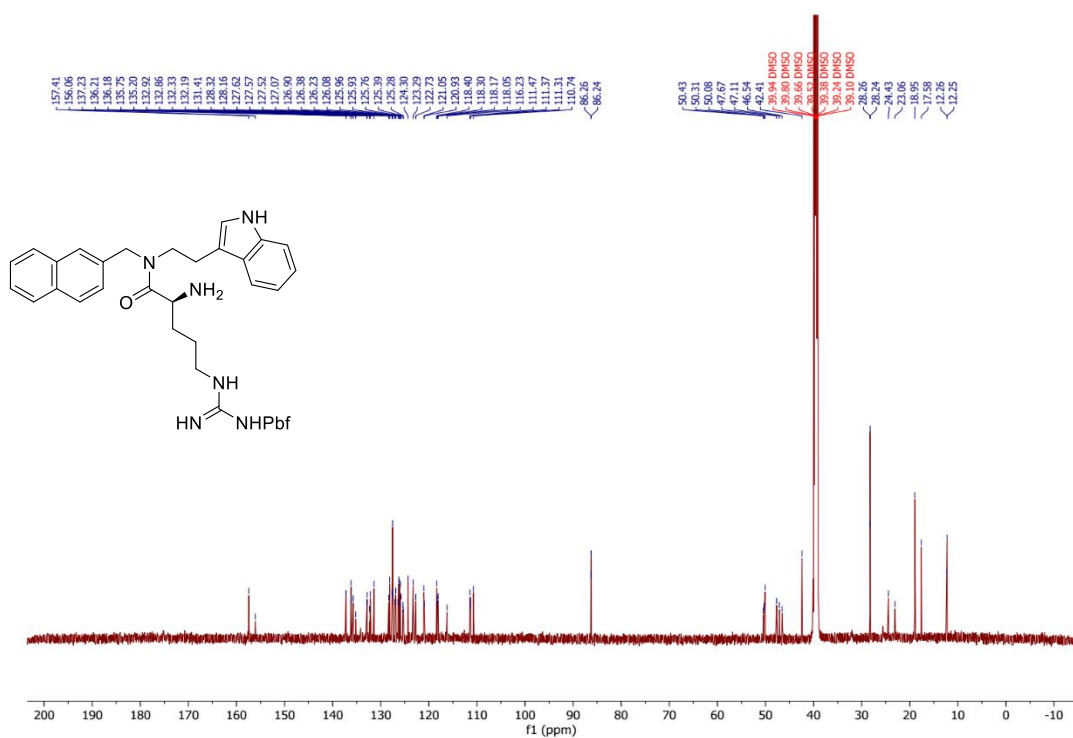

91. Compound 22-  $^{13}\text{C}$ NMR dept 135

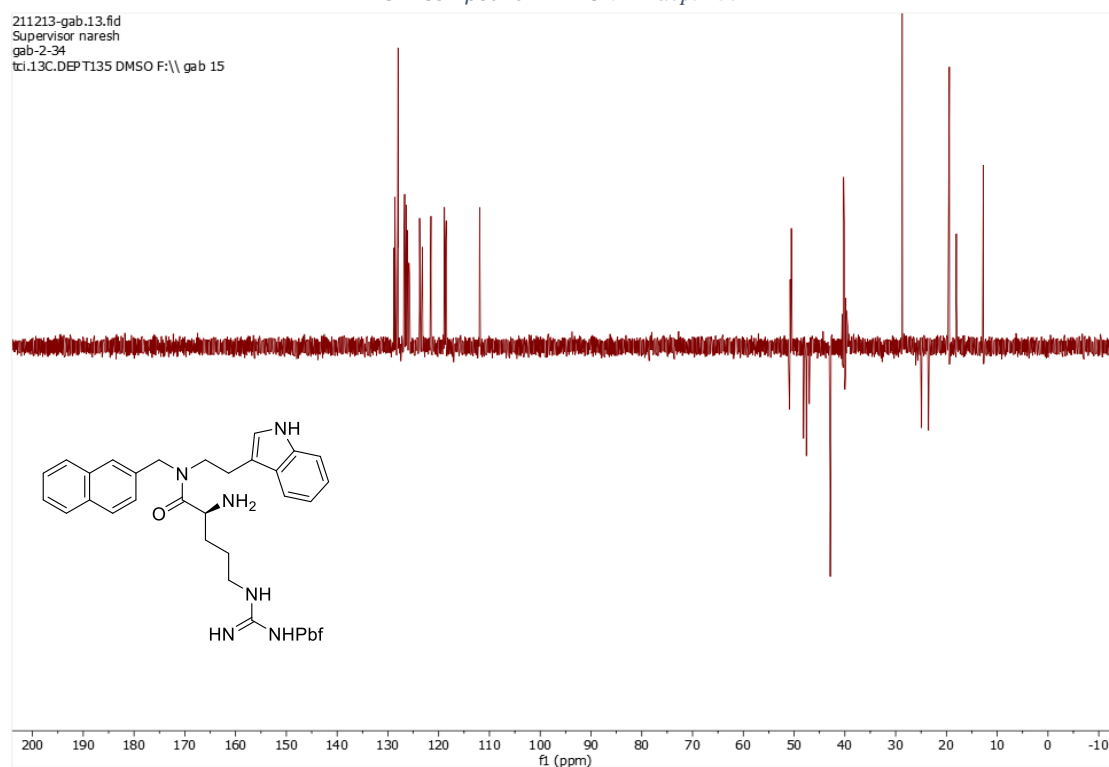

92. Compound 22- HSQC

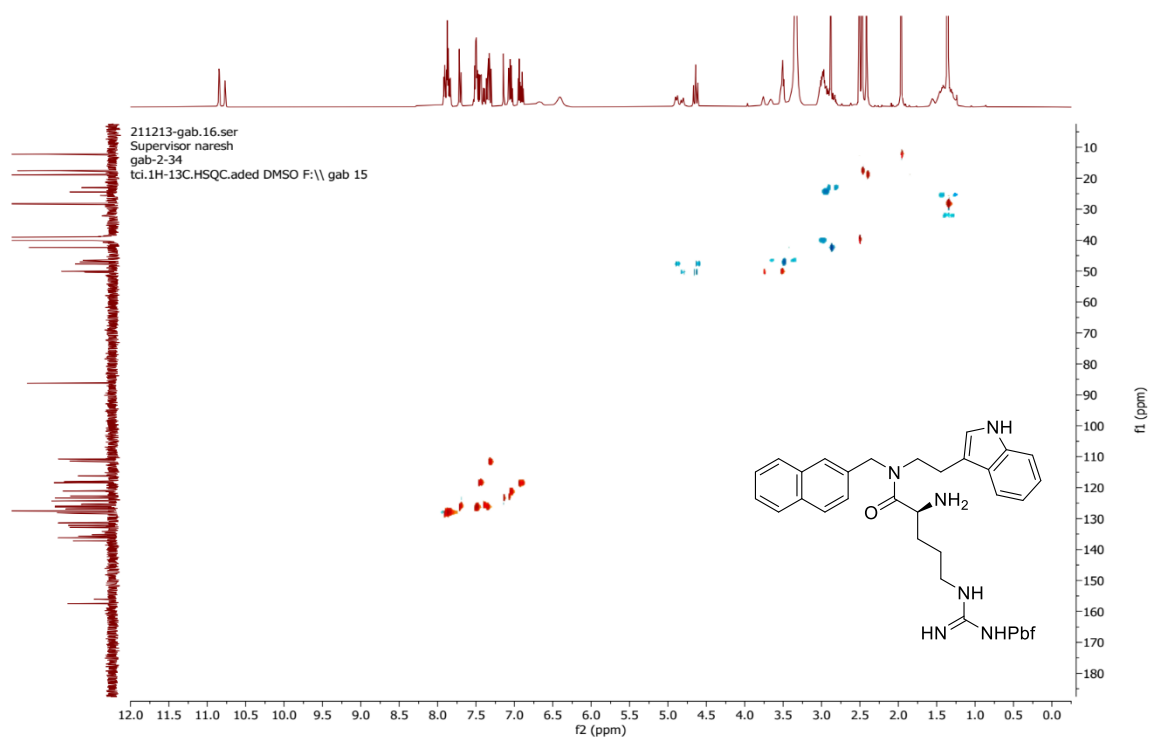

**10-**  $^1\text{H}$ , and  $^{13}\text{C}$  NMR of mono-guanidine naphthyl-indole and naphthyl-phenyl based peptoids.

93. Compound **13a**-  $^1\text{H}$ NMR

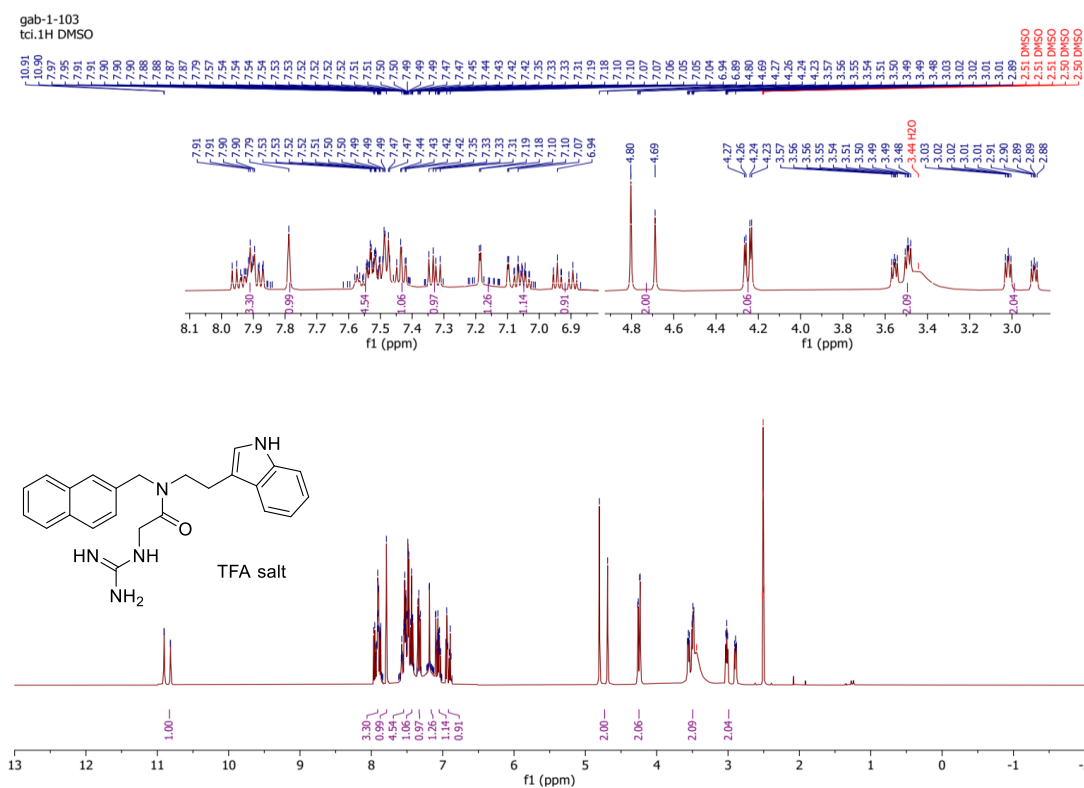

94. Compound **13a**-  $^{13}\text{C}$ NMR

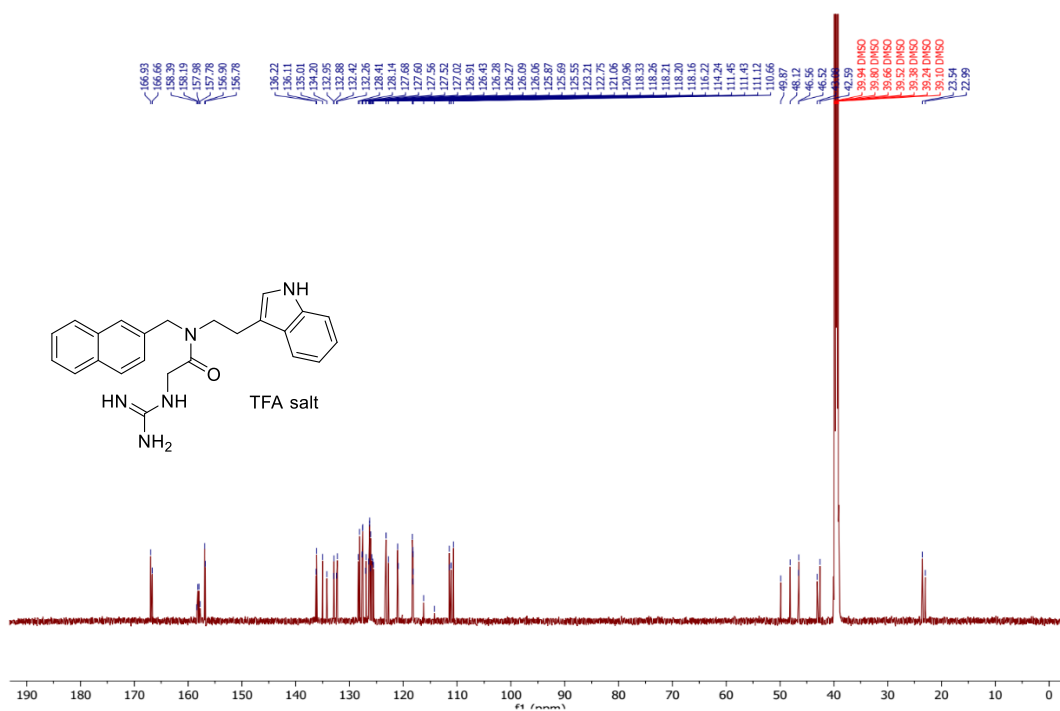

95. Compound **13a**-  $^{13}\text{C}$ NMR dept 135

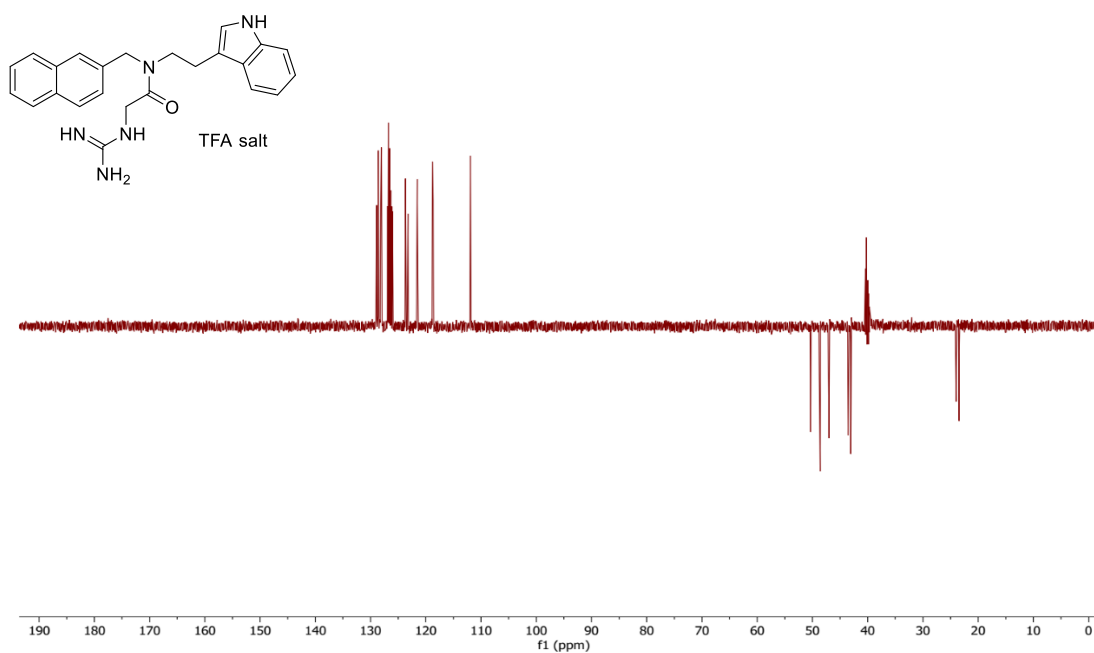

96. Compound **13a**- HSQC

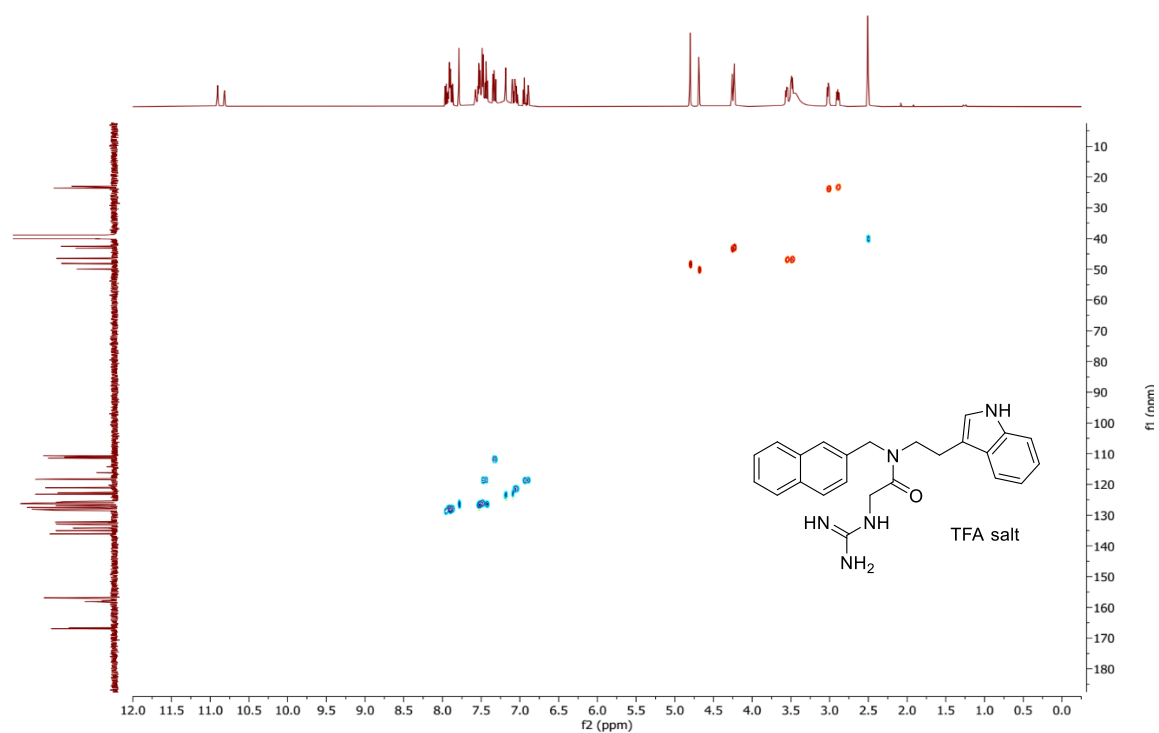

97. Compound **13b**- <sup>1</sup>HNMR

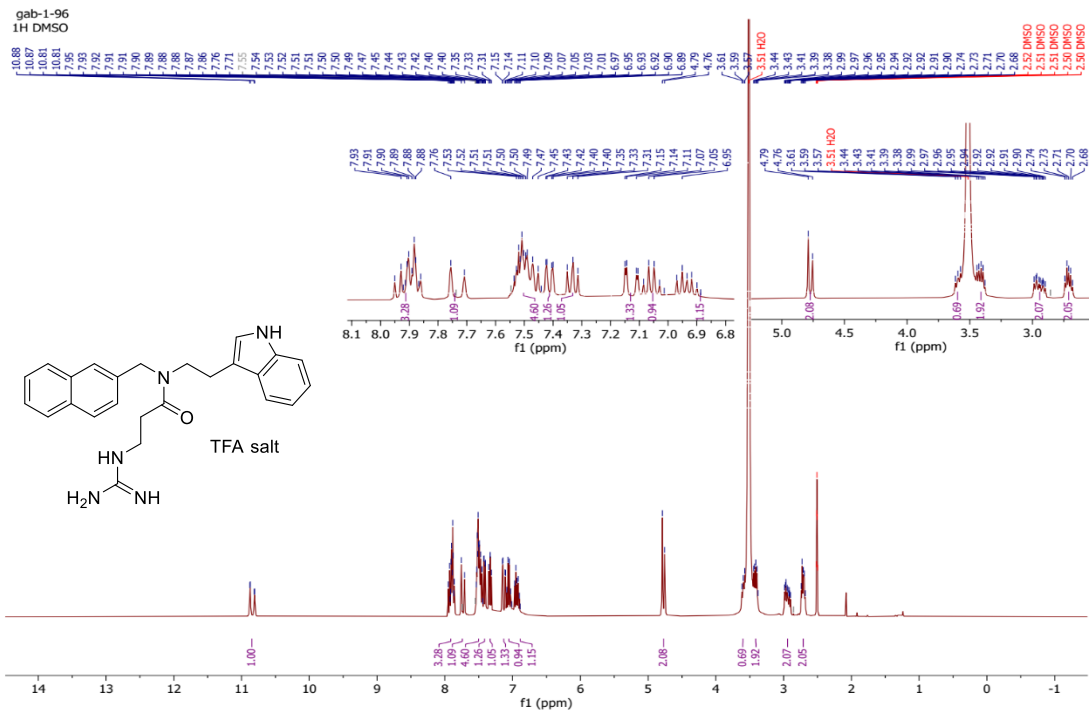

98. Compound **13b**-  $^{13}\text{C}$ NMR

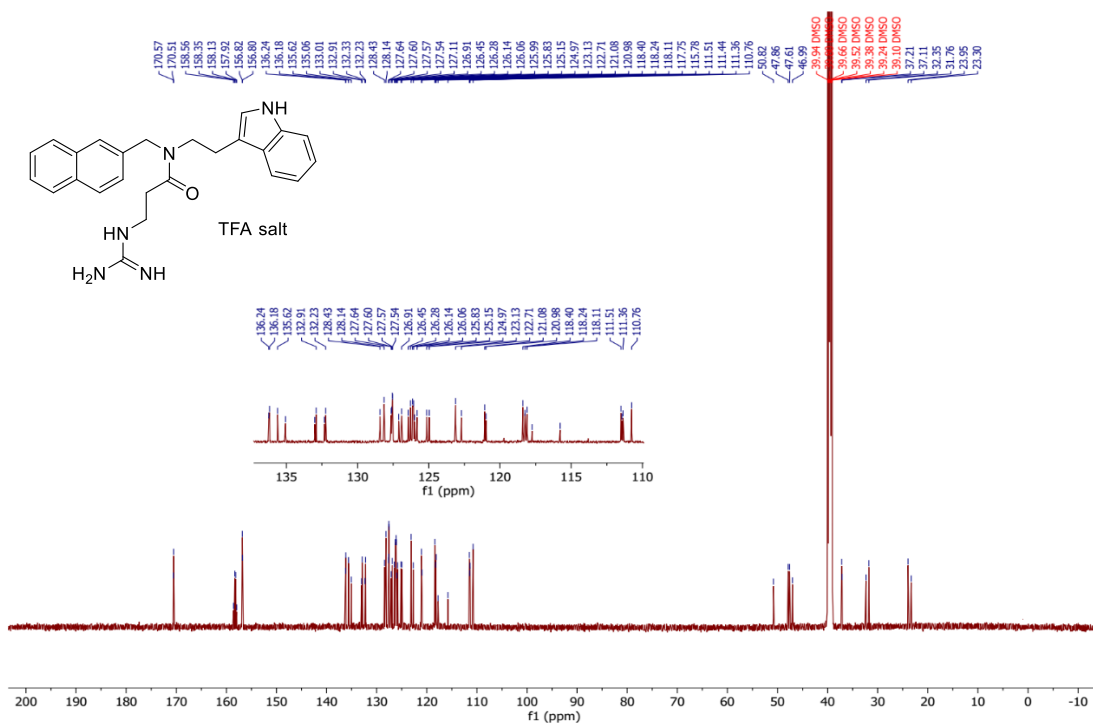



99. Compound **13b**-  $^{13}\text{C}$ NMR dept 135

220120-gab.19.fid  
Supervisor naresh  
gab-1-96  
tri.13C.DEPT135 DMSO {F:\Ernst\} gab 23

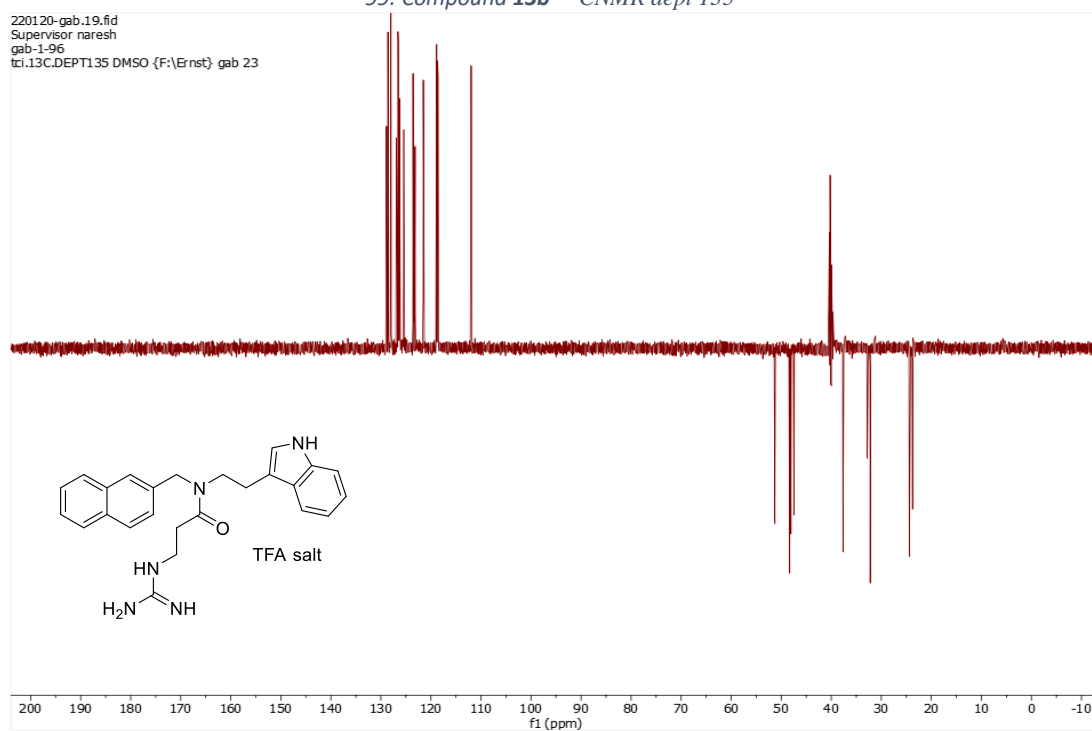

100. Compound **13b**-HSQC

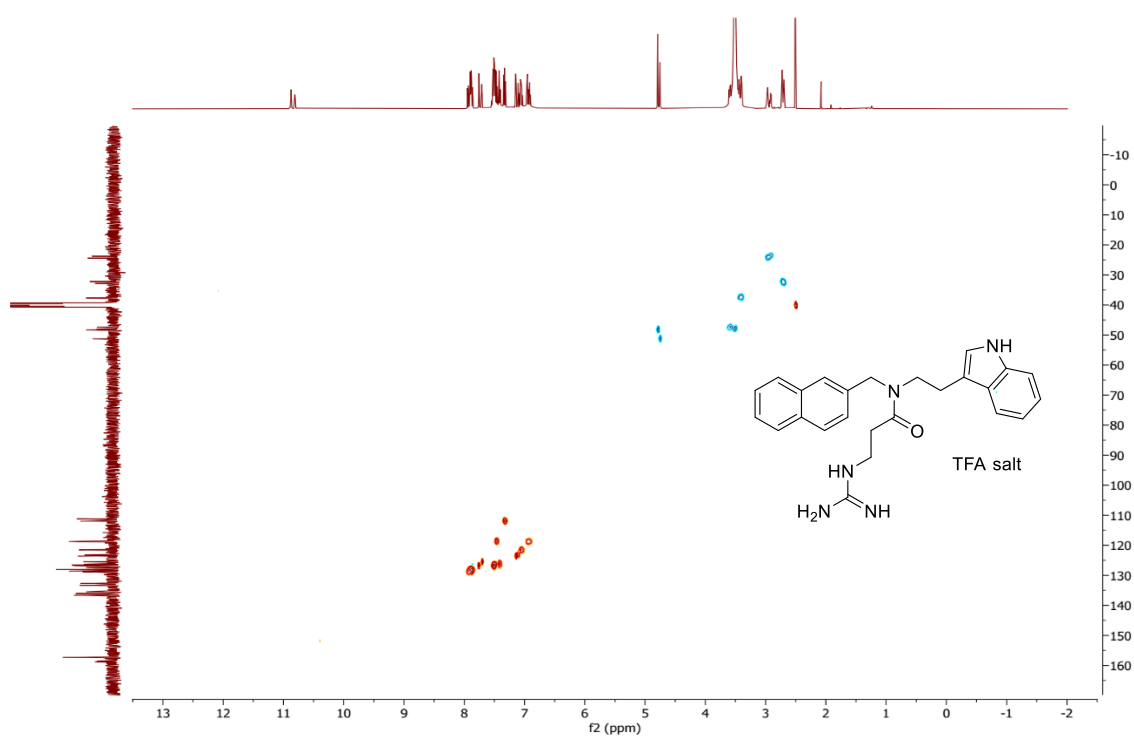

101. Compound **13c**-<sup>1</sup>HNMR

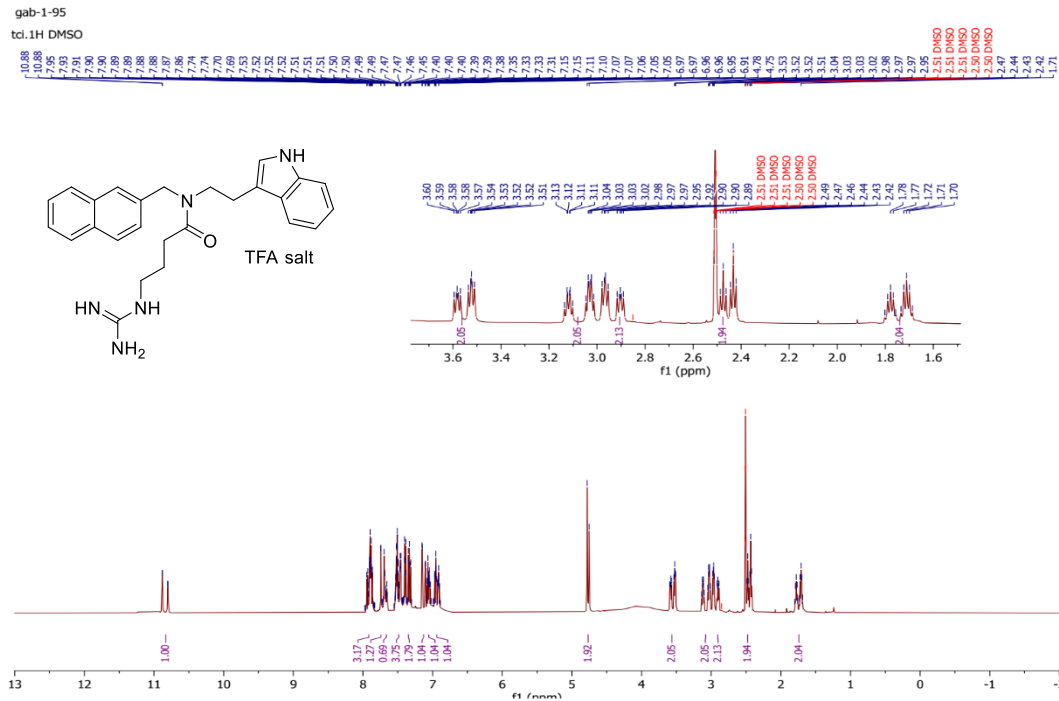

102. Compound **13c**-  $^{13}\text{C}$ NMR

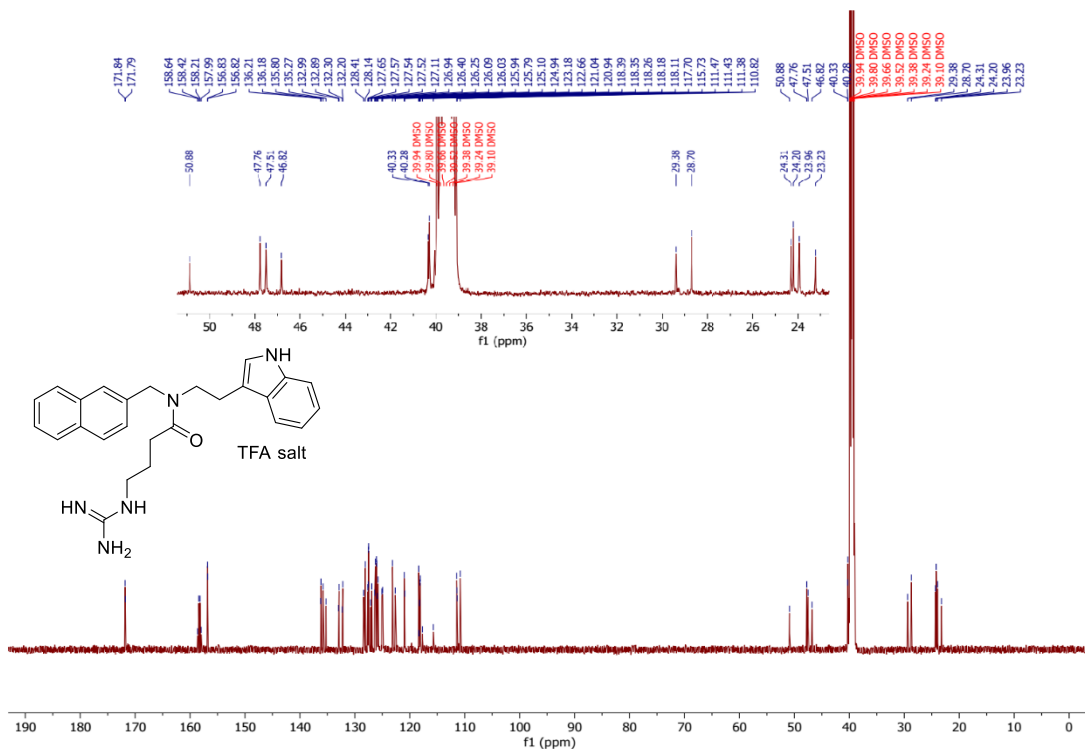

103. Compound **13c**-  $^{13}\text{C}$ NMR dept 135

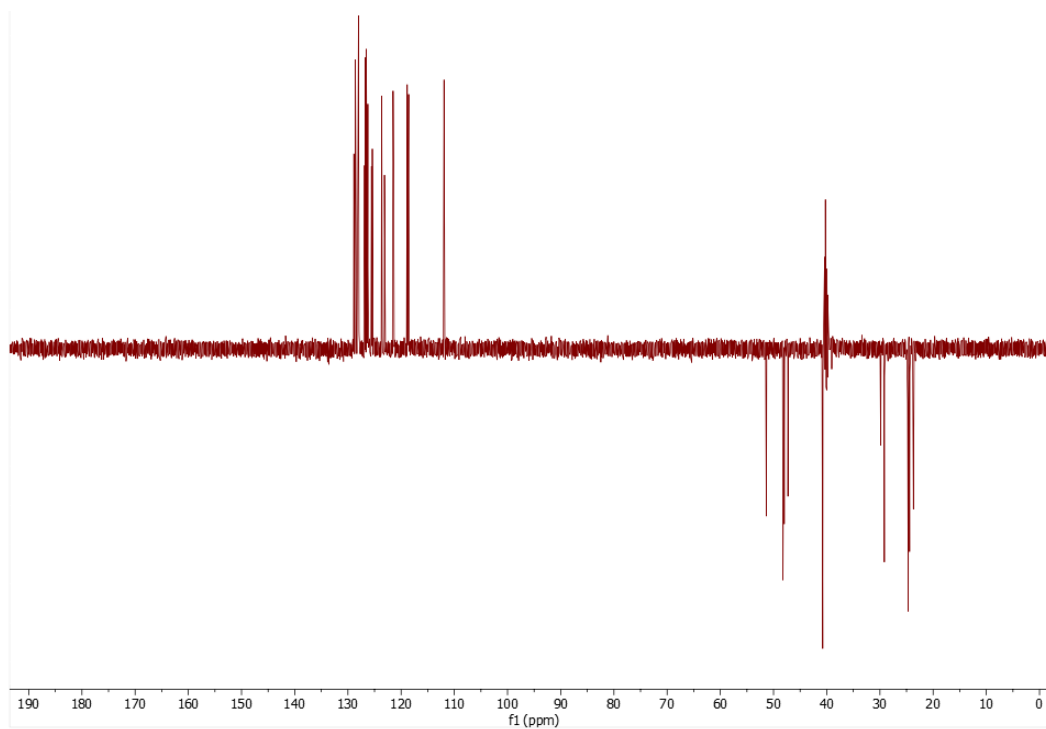

104. Compound **13c**- HSQC

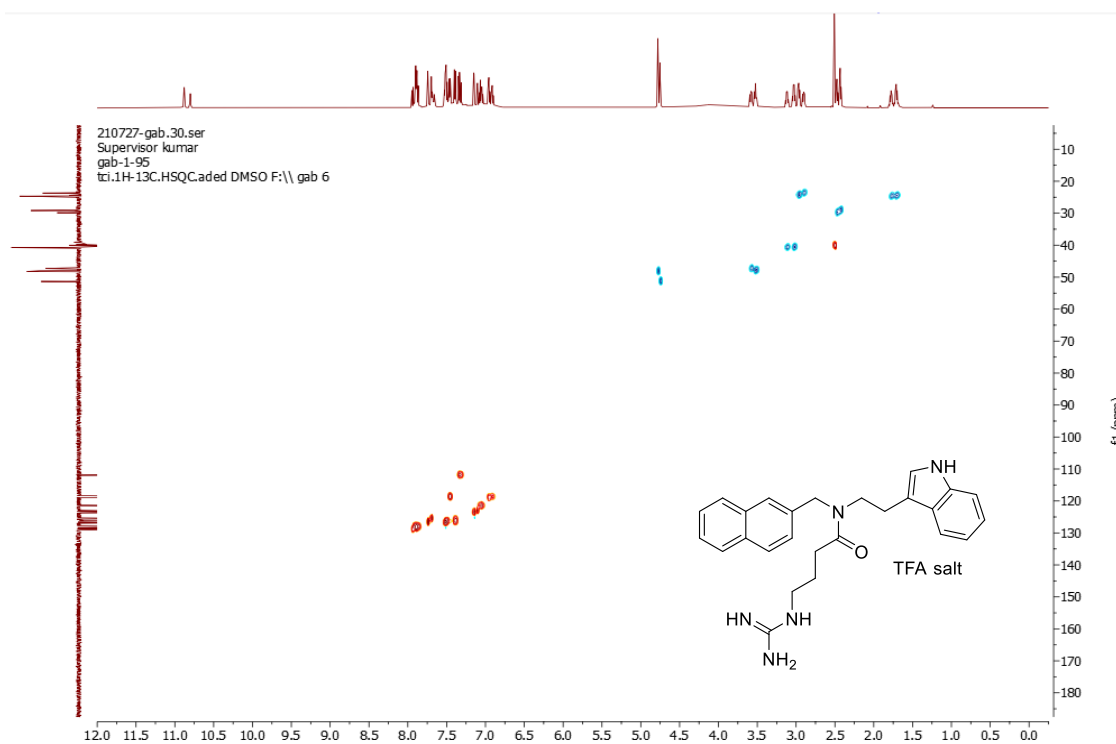

105. Compound **13d**-  $^1\text{H}$ NMR

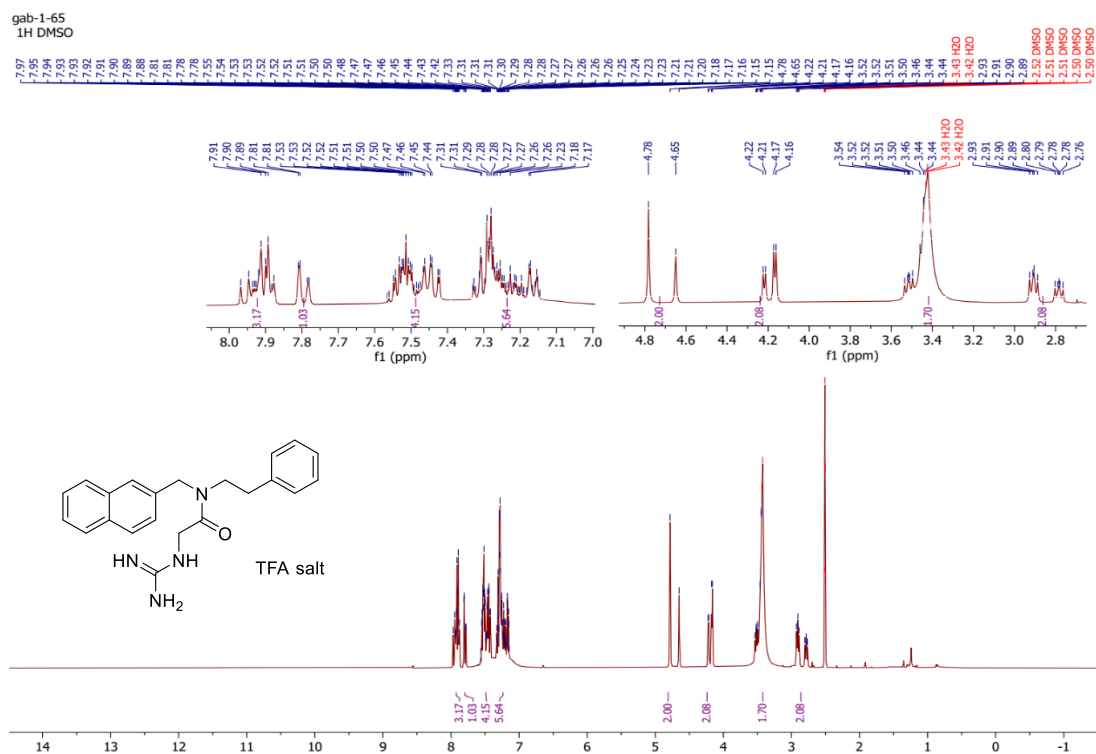

106. Compound **13d**-  $^{13}\text{C}$ NMR

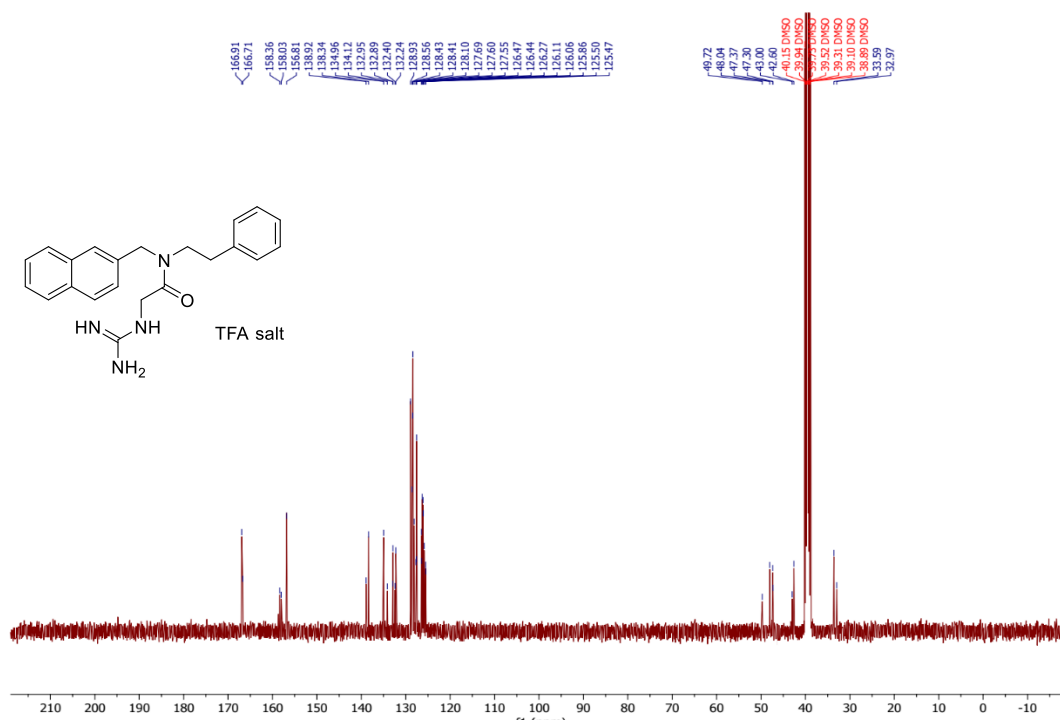

107. Compound **13d**-  $^{13}\text{C}$ NMR dept 135

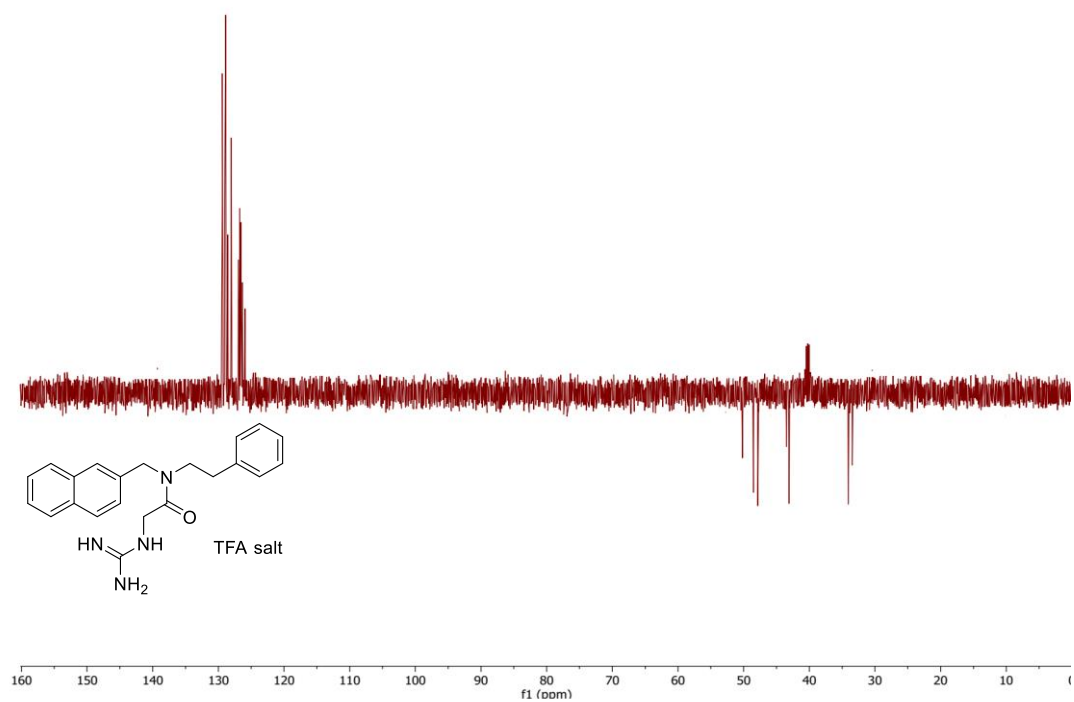

108. Compound **13d**- HSQC

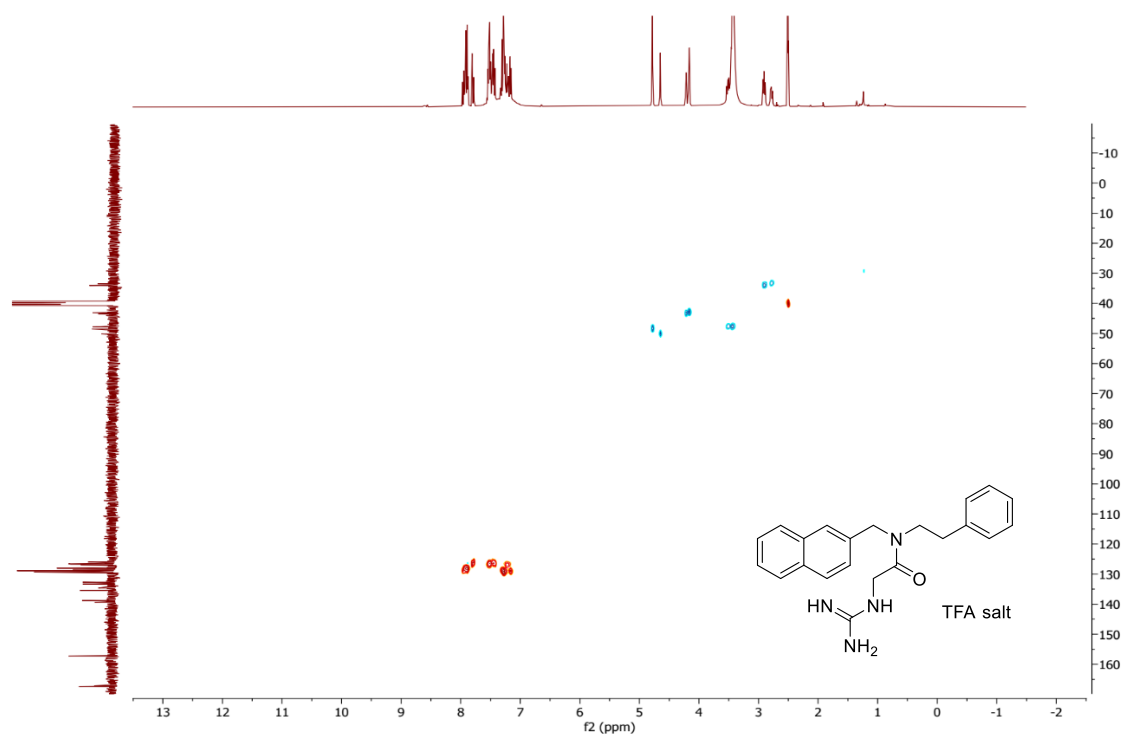

109. Compound **13e**-  $^1\text{H}$ NMR

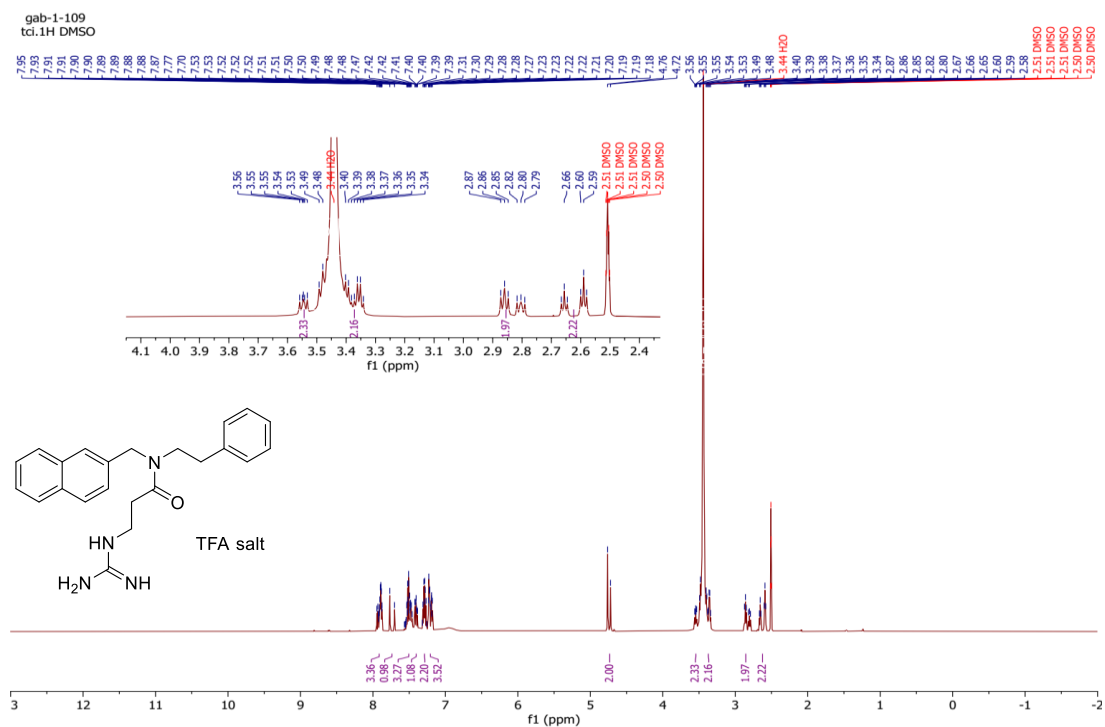

110. Compound **13e**-  $^{13}\text{C}$ NMR

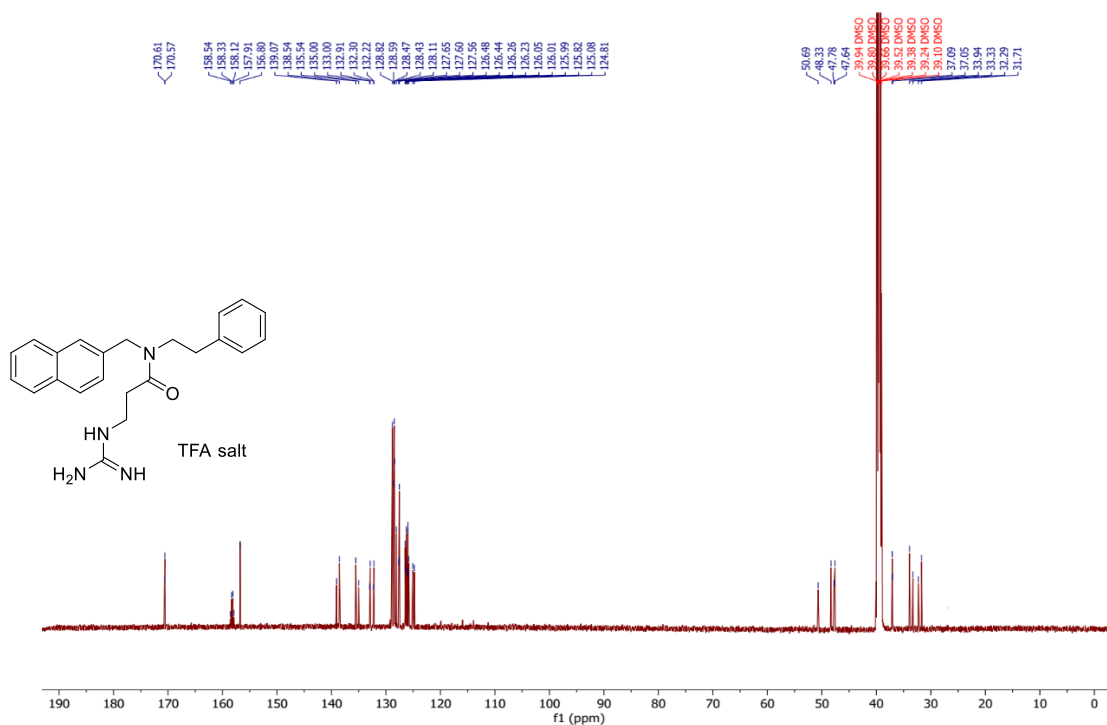

111. Compound **13e**-  $^{13}\text{C}$ NMR dept 135

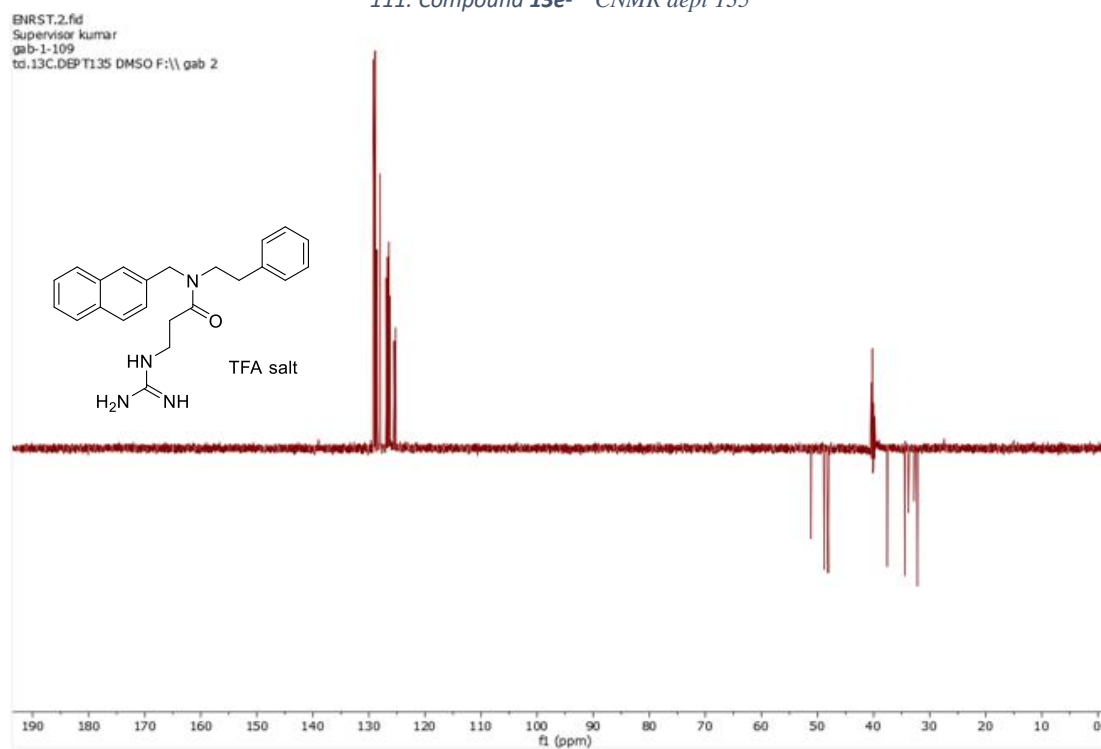

112. Compound **13e**- HSQC

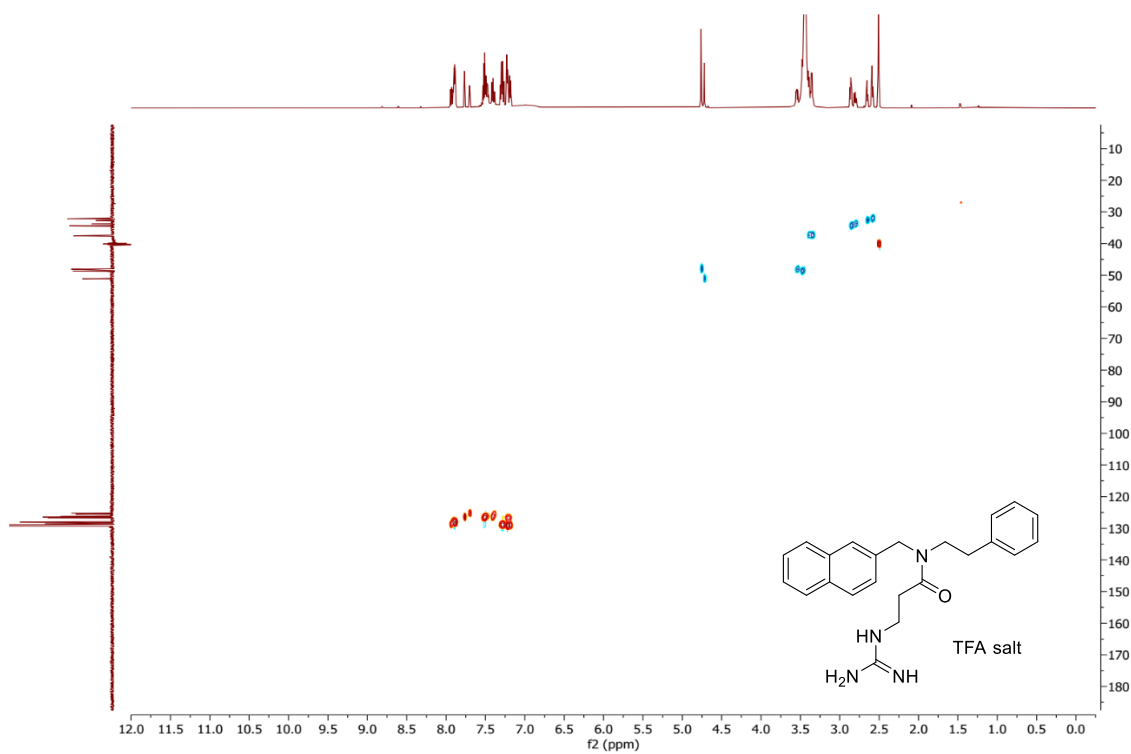

113. Compound **13f**- <sup>1</sup>H NMR

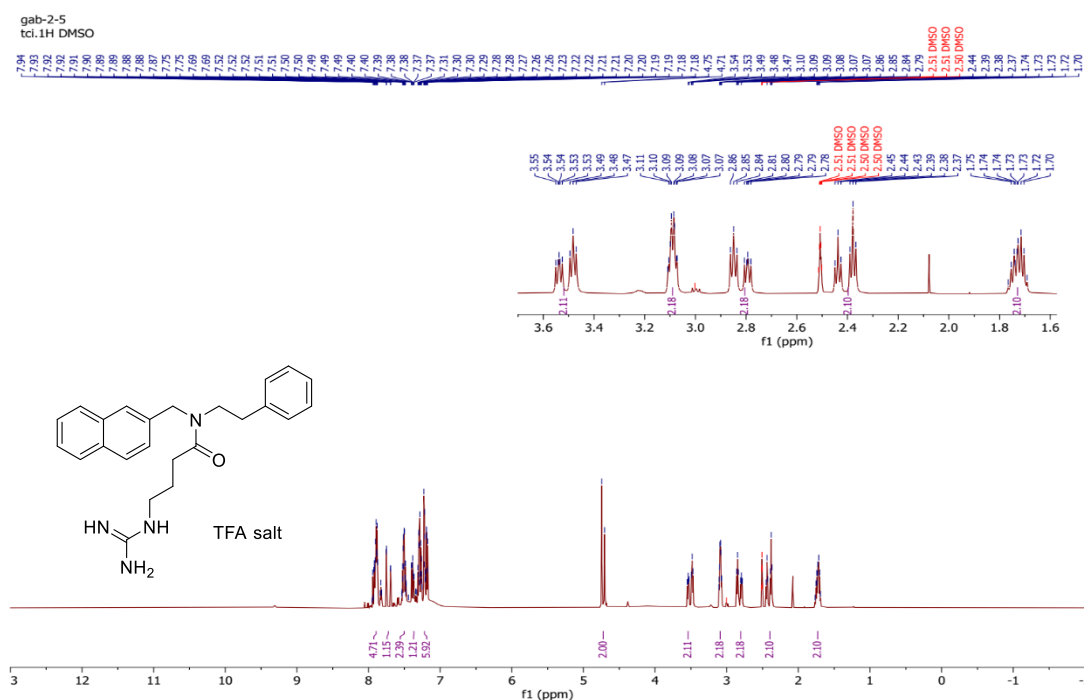

114. Compound **13f**- <sup>13</sup>C NMR

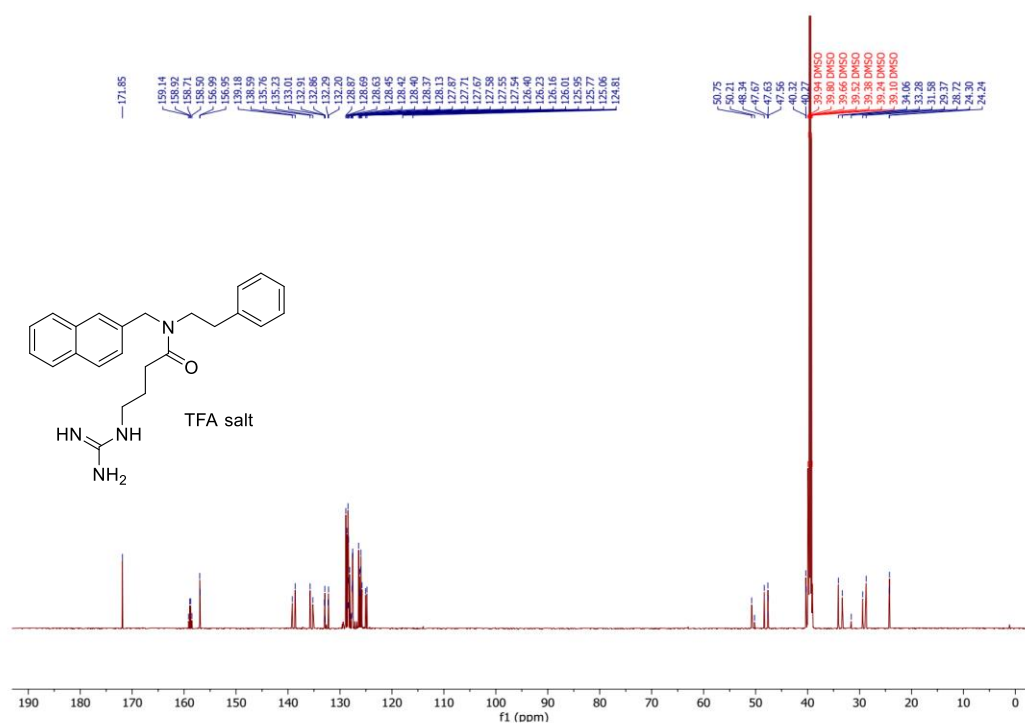



115. Compound **13f**-  $^{13}\text{C}$ NMR dept 135

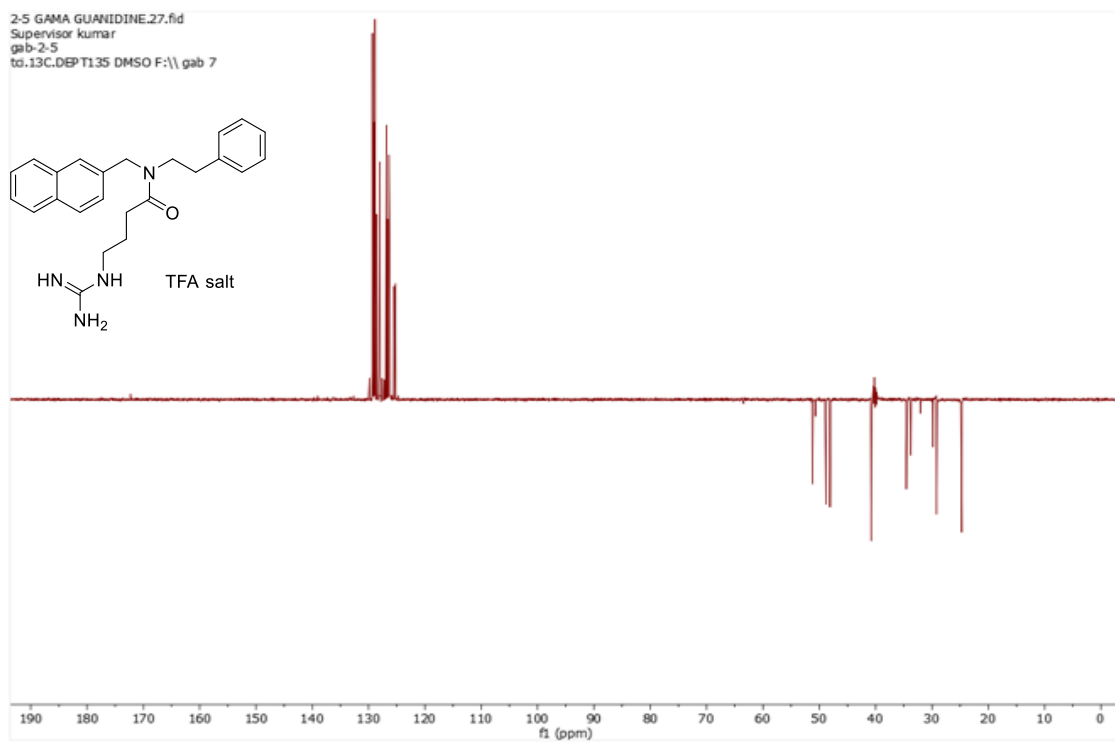

116. Compound **13f**- HSQC

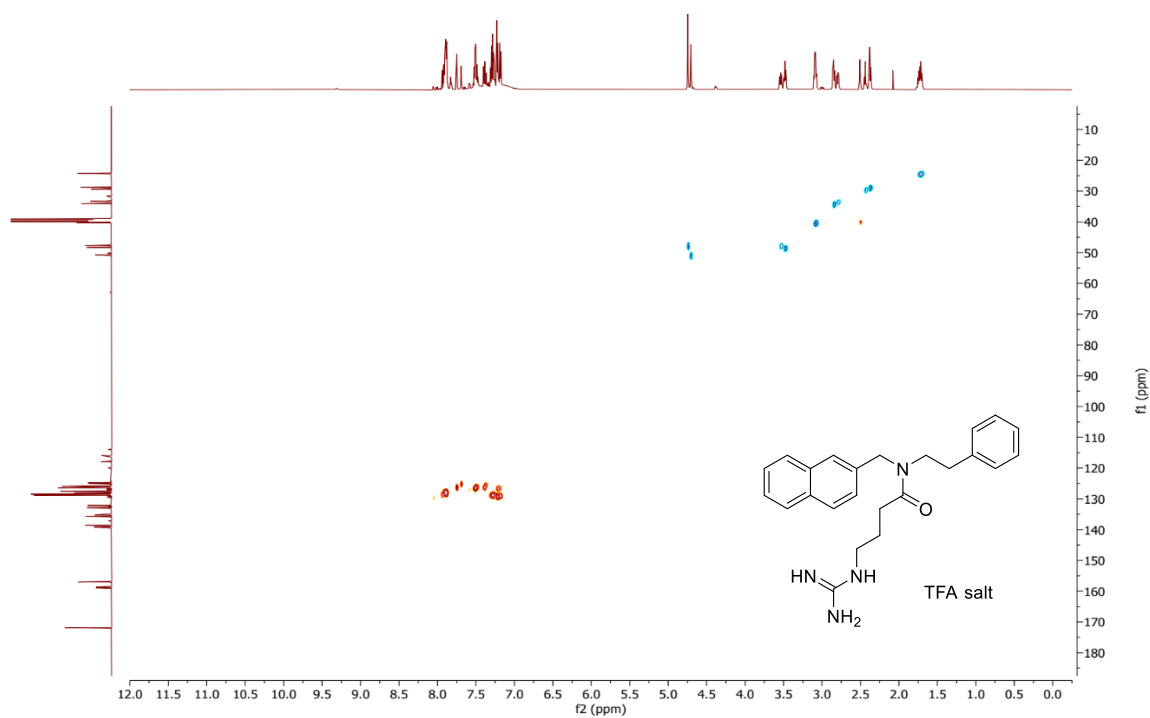

### 11- $^1\text{H}$ , and $^{13}\text{C}$ NMR of di-guanidine-naphthyl- indole based peptoids.

117. Compound **20b**- <sup>1</sup>HNMR

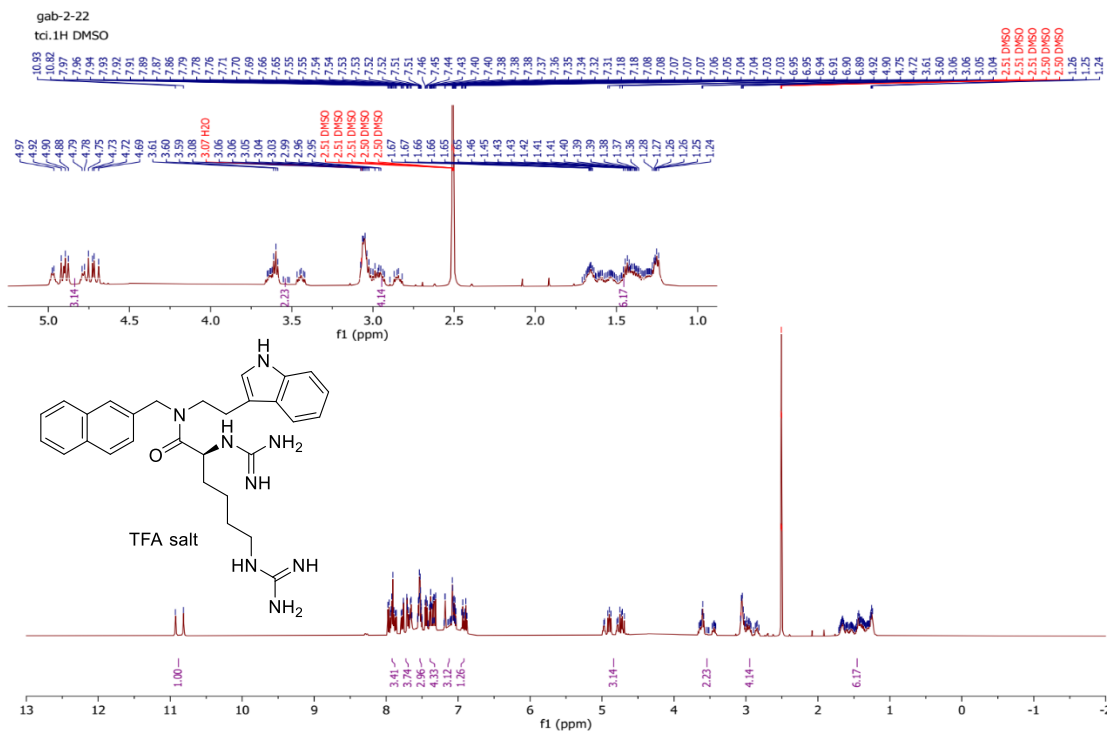

118. Compound **20b**-  $^{13}\text{C}$ NMR

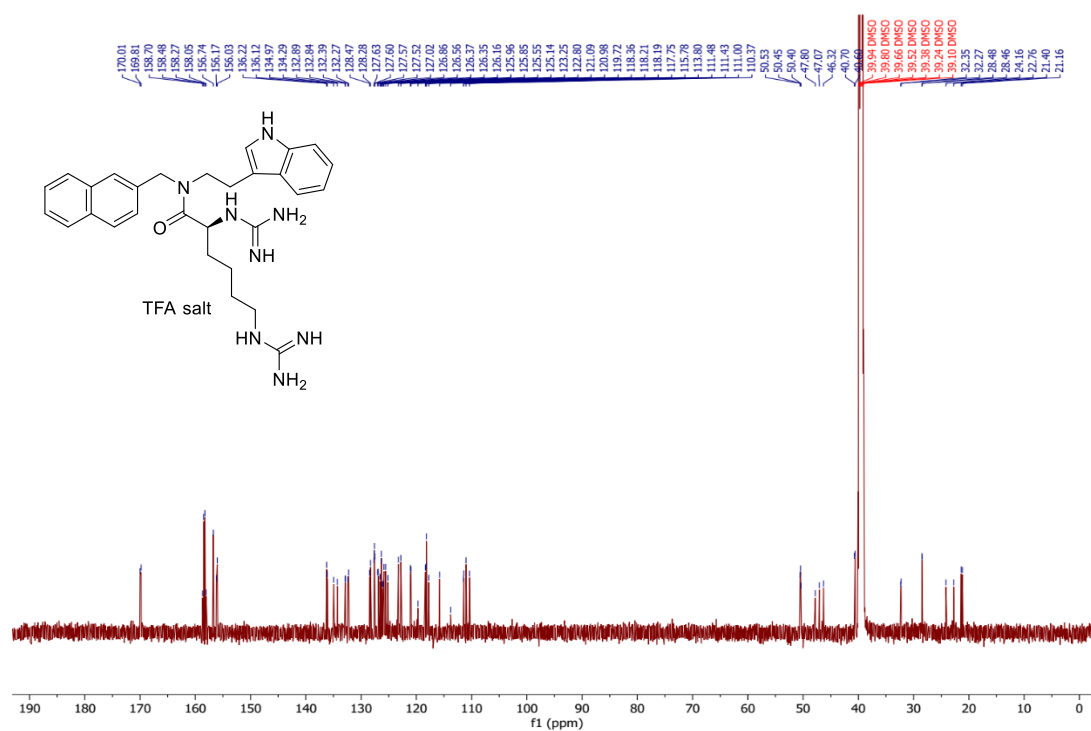

119. Compound **20b**- $^{13}\text{C}$ NMR dept 135

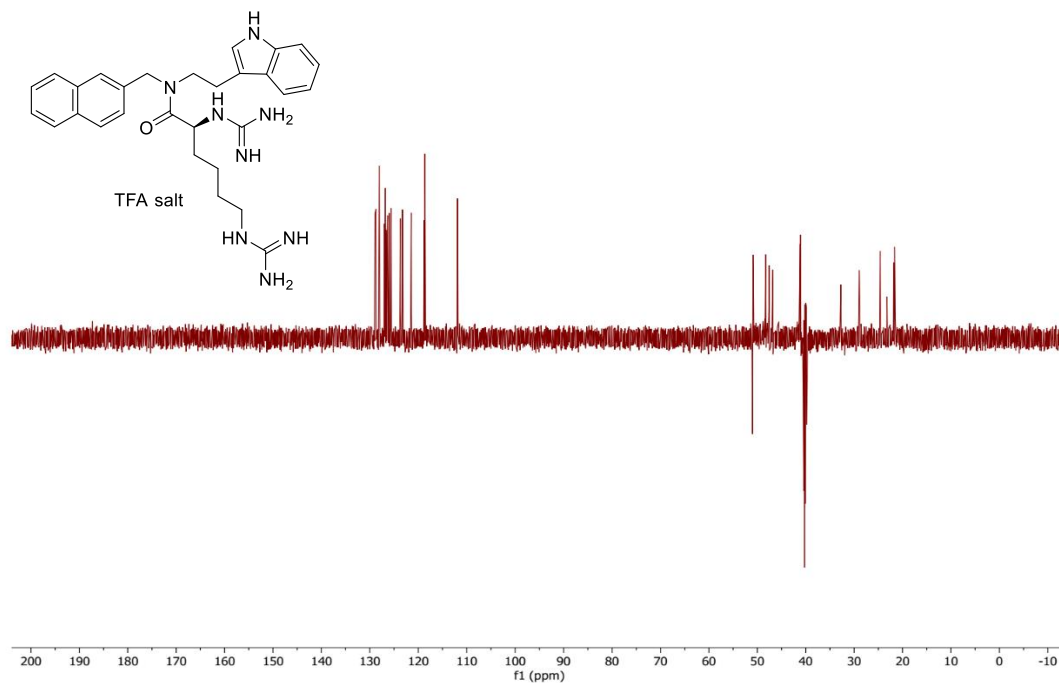

120. Compound **20b**-HSQC

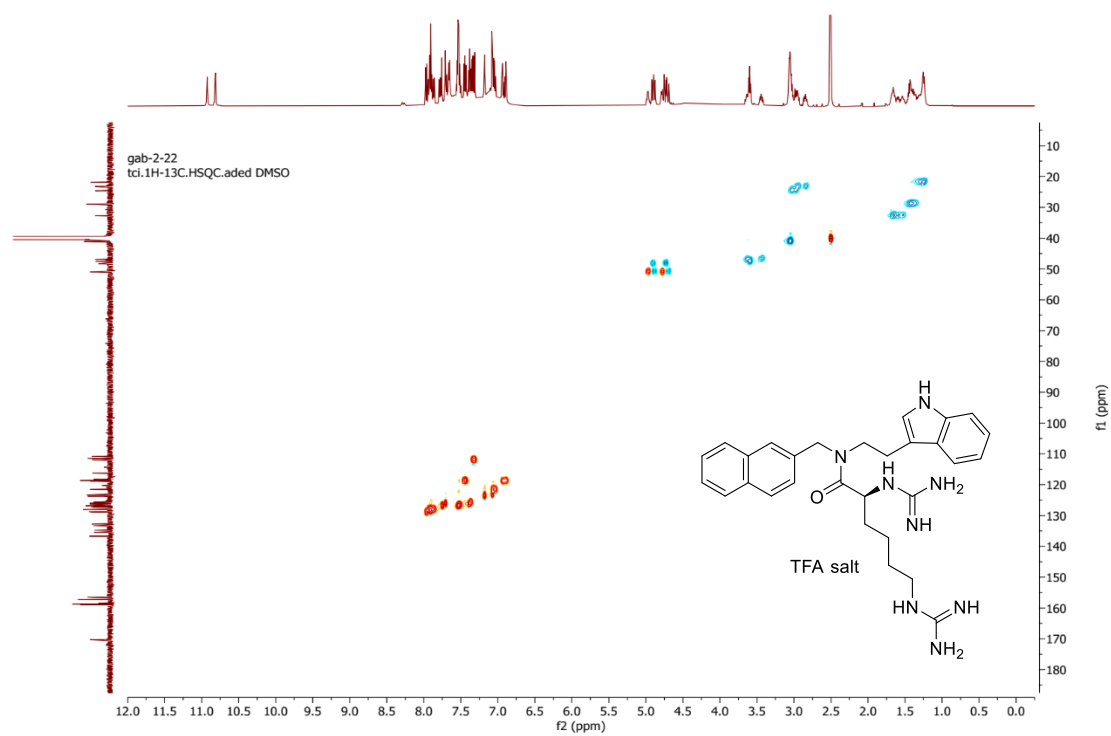

121. Compound **20a**- <sup>1</sup>HNMR

2-36. gab-2-23  
1H DMSO

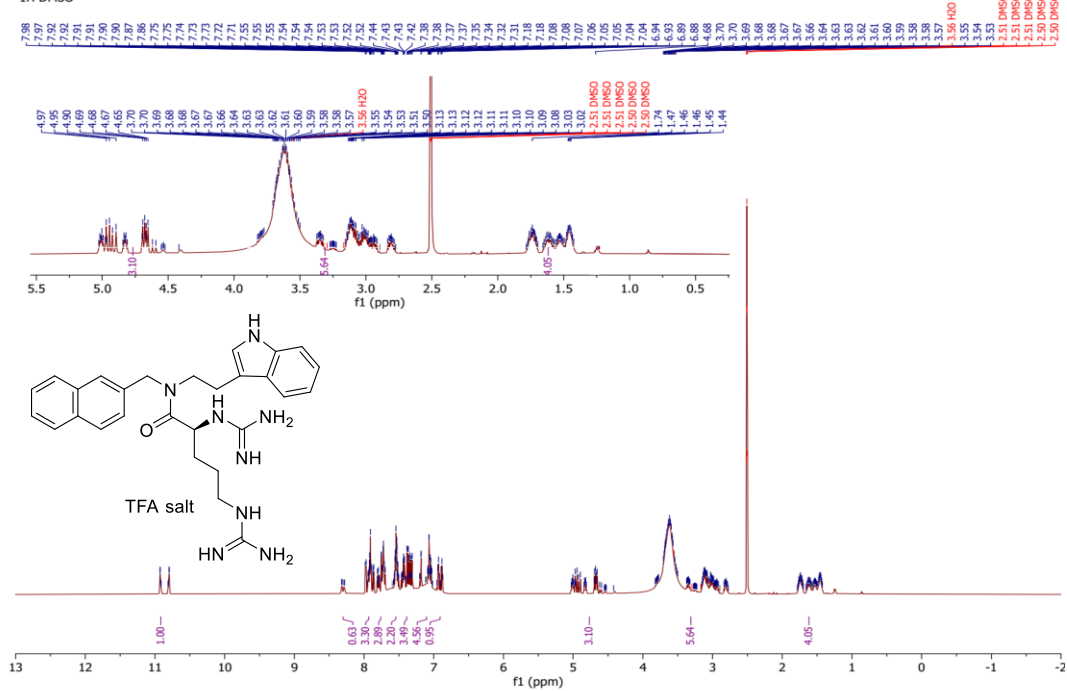

122. Compound **20a**-  $^{13}\text{C}$ NMR

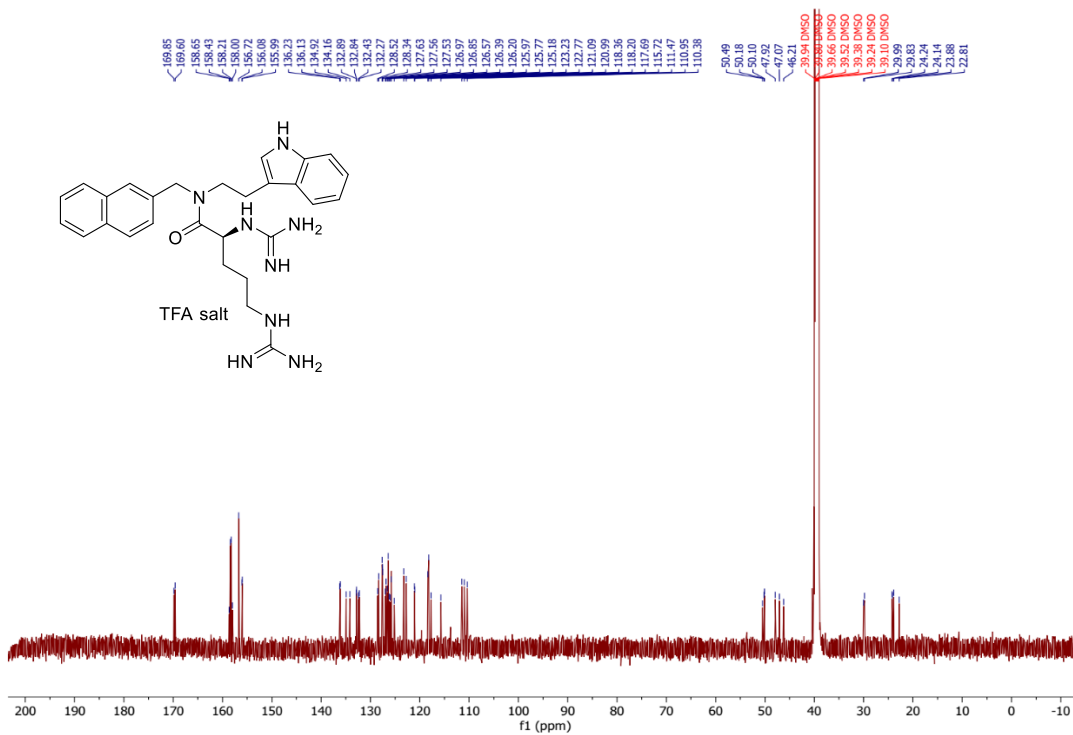

123. Compound **20a**-  $^{13}\text{C}$ NMR dept 135

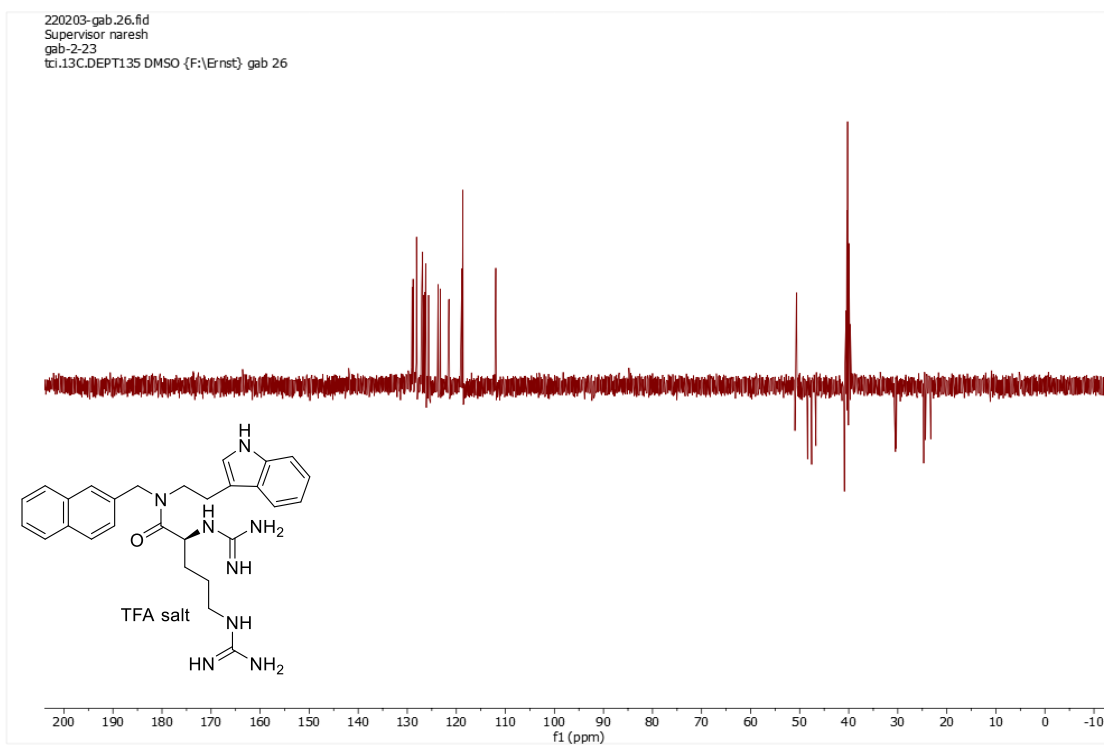

124. Compound **20a**- HSQC

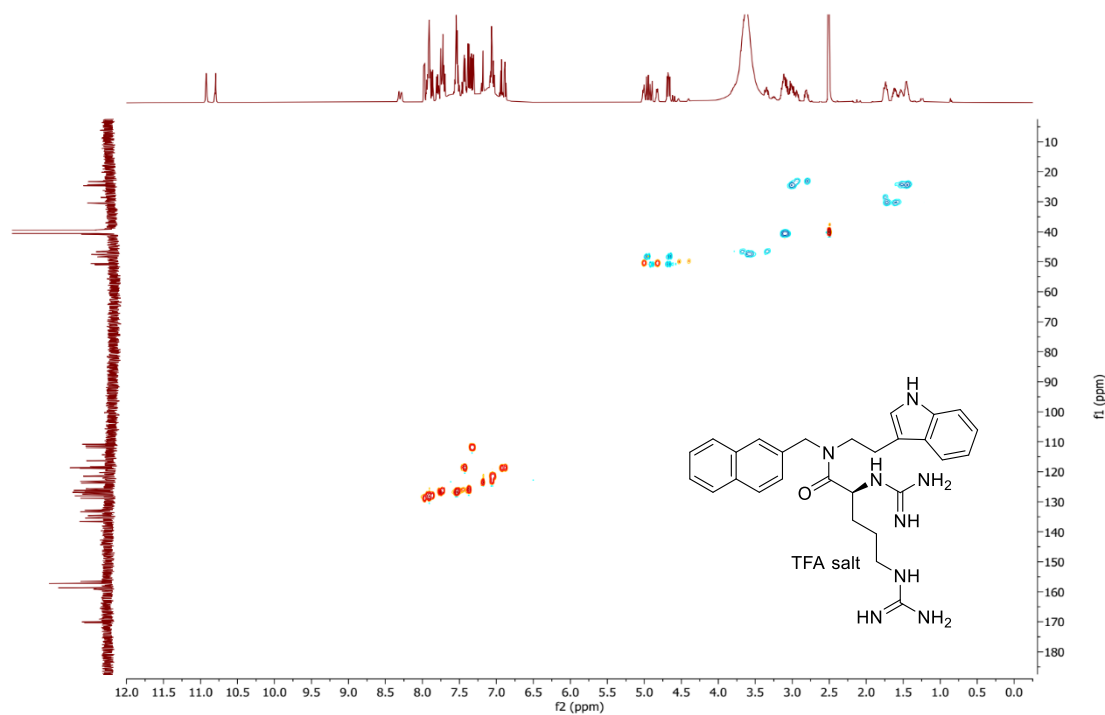

gab-2-40

tci.1h DMSO

Chemical structure of gab-2-40 (TFA salt) is shown. The structure features a naphthalene ring system connected via a methylene group to a carbonyl group. The carbonyl is part of an amide linkage to a chiral center (marked with a wedge bond) which is also attached to a primary amine group. The chiral center is further connected to a side chain containing a guanidinium group (HN=C(NH2)NH2).

<sup>1</sup>H NMR spectrum (DMSO-d<sub>6</sub>) is displayed below the structure. The spectrum shows peaks corresponding to the protons in the molecule, with integration values provided for several regions. Key peaks are labeled with their chemical shifts (ppm):

- 8.33, 8.32, 8.29, 7.98, 7.93, 7.91, 7.78, 7.77, 7.55, 7.53, 7.51, 7.43, 7.41, 7.40, 7.36, 7.34, 7.33, 7.31, 7.20, 7.09, 7.08, 7.07, 7.06, 7.05, 6.89 (Aromatic protons)
- 5.00, 4.99, 4.97, 4.97 (NH protons)
- 4.70, 4.69, 4.62, 4.59, 4.55, 4.54, 4.53, 4.52 (CH protons)
- 4.42, 4.41, 4.41, 4.40, 4.35 (CH protons)
- 8.33, 8.32, 8.29, 7.98, 7.93, 7.91, 7.78, 7.77, 7.55, 7.53, 7.51, 7.43, 7.41, 7.40, 7.36, 7.34, 7.33, 7.31, 7.20, 7.09, 7.08, 7.07, 7.06, 7.05, 6.89 (Aromatic protons)
- 5.00, 4.99, 4.97, 4.97 (NH protons)
- 4.70, 4.69, 4.62, 4.59, 4.55, 4.54, 4.53, 4.52 (CH protons)
- 4.42, 4.41, 4.41, 4.40, 4.35 (CH protons)
- 3.09, 4.02, 1.54, 2.13, 0.75, 0.75, 1.08, 1.13, 0.90, 0.94 (Integration values for aromatic region)
- 1.04, 1.05, 1.10 (Integration values for CH region)
- 2.08, 4.03 (Integration values for CH region)
- 4.14 (Integration value for CH region)

[illegible]

127. Compound **23** - $^{13}\text{C}$ NMR-dept 135

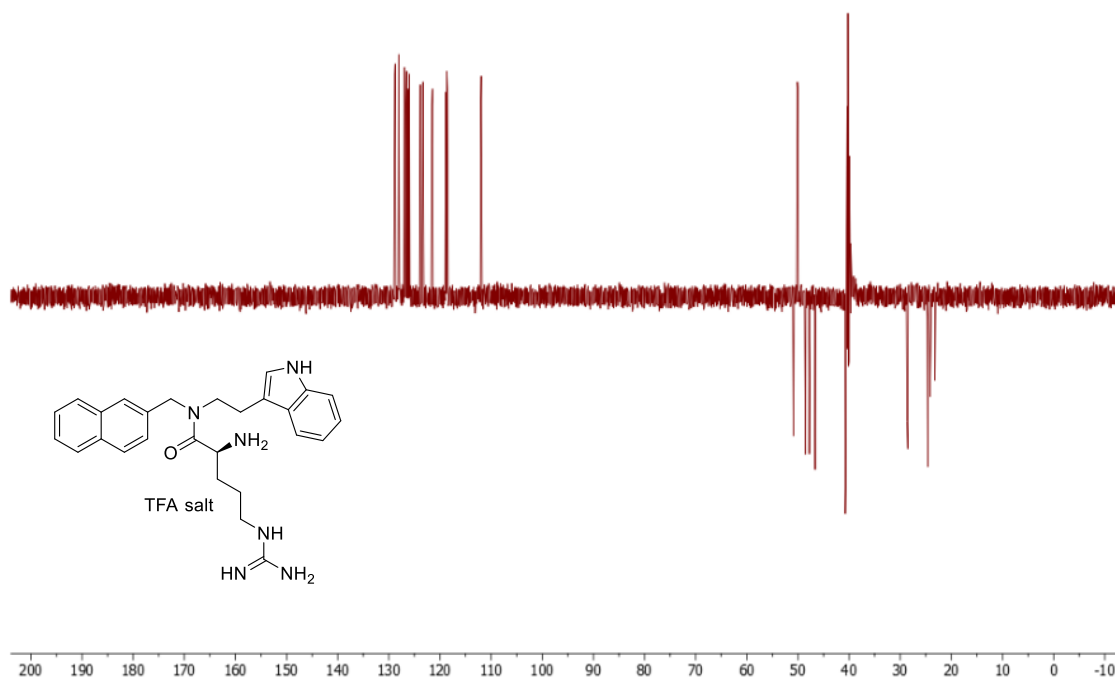

128. Compound **23** -HSQC

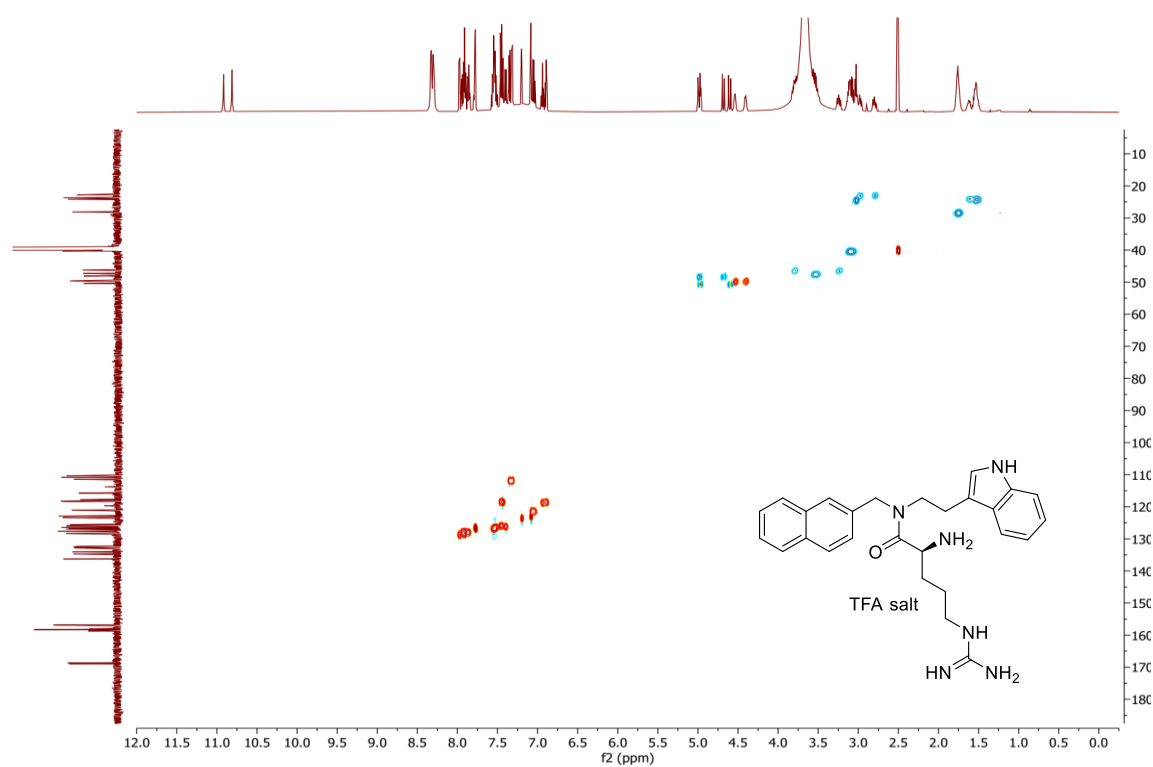

### 12- <sup>1</sup>H, and <sup>13</sup>CNMR of dimethyl- naphthyl-indole and naphthyl-phenyl based peptoids.

129. Compound **14a** -<sup>1</sup>HNMR

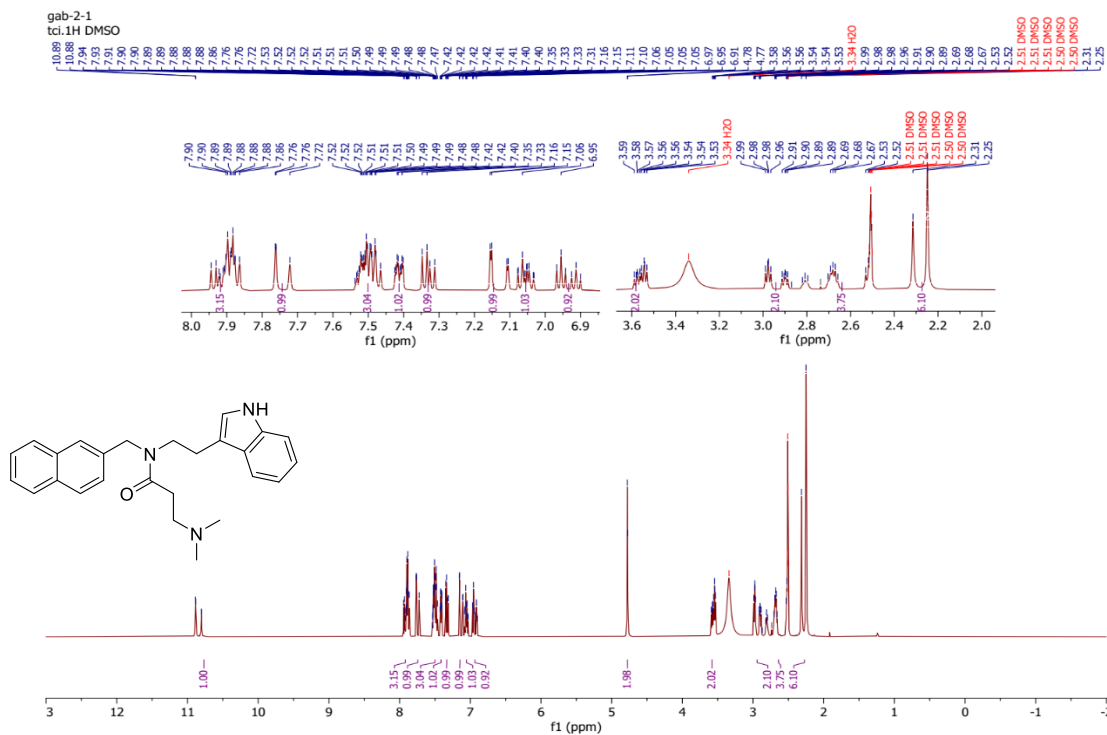

130. Compound **14a** -<sup>13</sup>CNMR

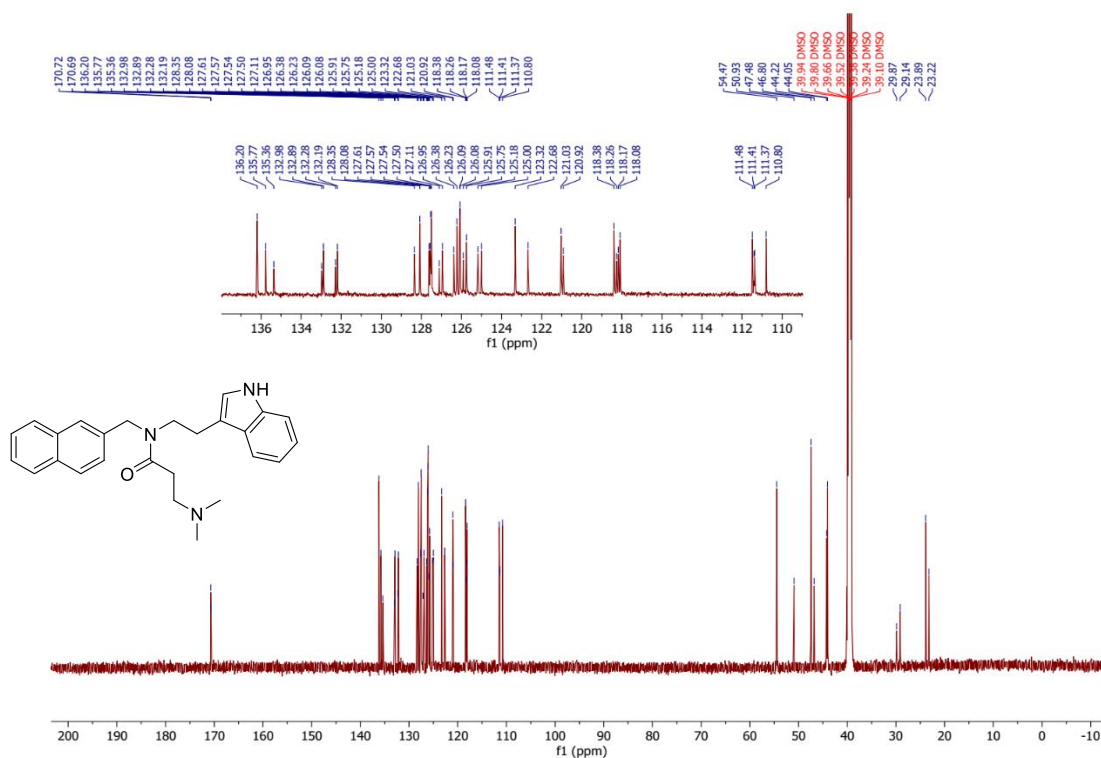



131. Compound **14a** -<sup>13</sup>CNMR-dept 135

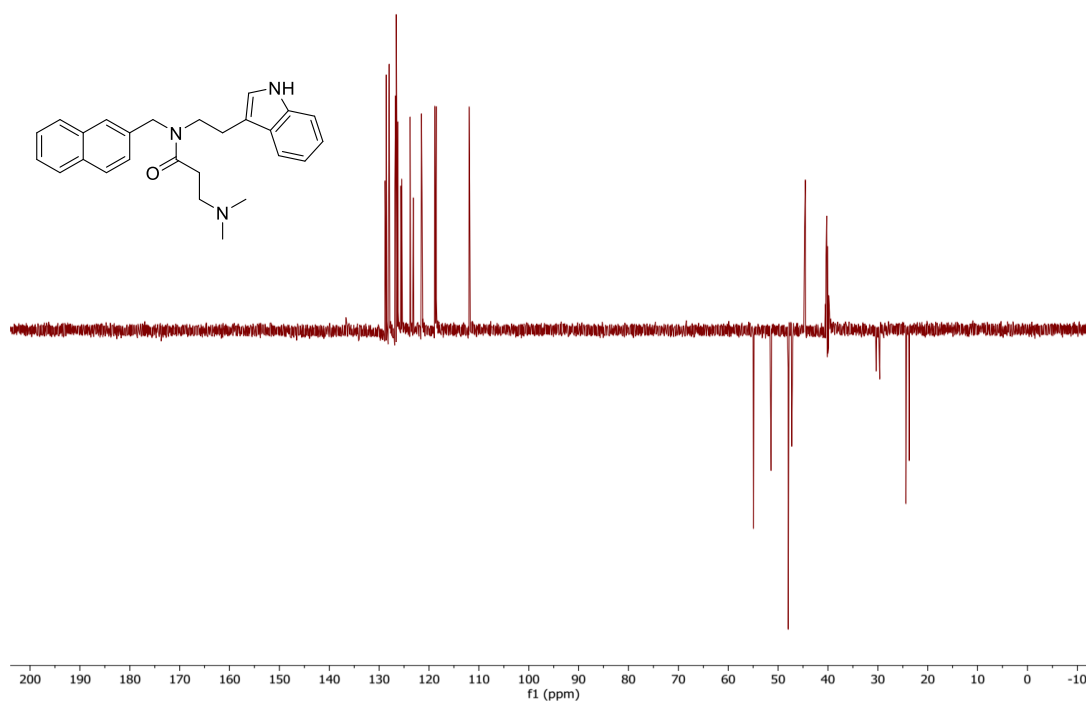

132. Compound **14a** - HSQC

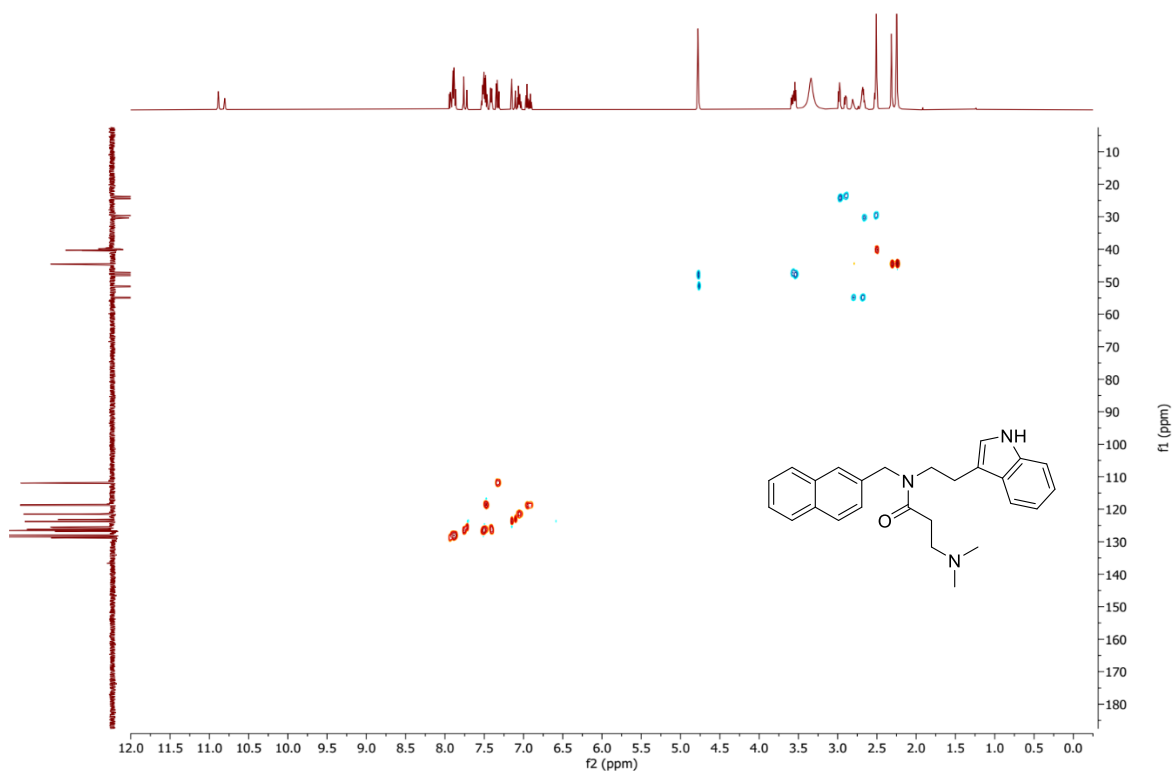

gab-2-7  
1H DMSO

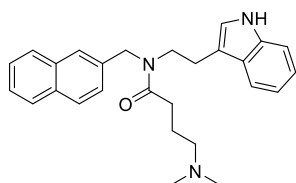

Chemical structure of compound 10 is shown above the spectrum. The spectrum displays peaks from 0 to 10 ppm, with a list of chemical shifts (delta) on the right side. The peaks are assigned to various protons in the molecule, including aromatic protons, amide protons, and aliphatic protons.

Chemical shifts (ppm): 7.91, 7.85, 7.81, 7.76, 7.71, 7.66, 7.61, 7.56, 7.51, 7.46, 7.41, 7.36, 7.31, 7.26, 7.21, 7.16, 7.11, 7.06, 7.01, 6.96, 6.91, 6.86, 6.81, 6.76, 6.71, 6.66, 6.61, 6.56, 6.51, 6.46, 6.41, 6.36, 6.31, 6.26, 6.21, 6.16, 6.11, 6.06, 6.01, 5.96, 5.91, 5.86, 5.81, 5.76, 5.71, 5.66, 5.61, 5.56, 5.51, 5.46, 5.41, 5.36, 5.31, 5.26, 5.21, 5.16, 5.11, 5.06, 5.01, 4.96, 4.91, 4.86, 4.81, 4.76, 4.71, 4.66, 4.61, 4.56, 4.51, 4.46, 4.41, 4.36, 4.31, 4.26, 4.21, 4.16, 4.11, 4.06, 4.01, 3.96, 3.91, 3.86, 3.81, 3.76, 3.71, 3.66, 3.61, 3.56, 3.51, 3.46, 3.41, 3.36, 3.31, 3.26, 3.21, 3.16, 3.11, 3.06, 3.01, 2.96, 2.91, 2.86, 2.81, 2.76, 2.71, 2.66, 2.61, 2.56, 2.51, 2.46, 2.41, 2.36, 2.31, 2.26, 2.21, 2.16, 2.11, 2.06, 2.01, 1.96, 1.91, 1.86, 1.81, 1.76, 1.71, 1.66, 1.61, 1.56, 1.51, 1.46, 1.41, 1.36, 1.31, 1.26, 1.21, 1.16, 1.11, 1.06, 1.01, 0.96, 0.91, 0.86, 0.81, 0.76, 0.71, 0.66, 0.61, 0.56, 0.51, 0.46, 0.41, 0.36, 0.31, 0.26, 0.21, 0.16, 0.11, 0.06, 0.01.

135. Compound **14b** -<sup>13</sup>CNMR-dept 135

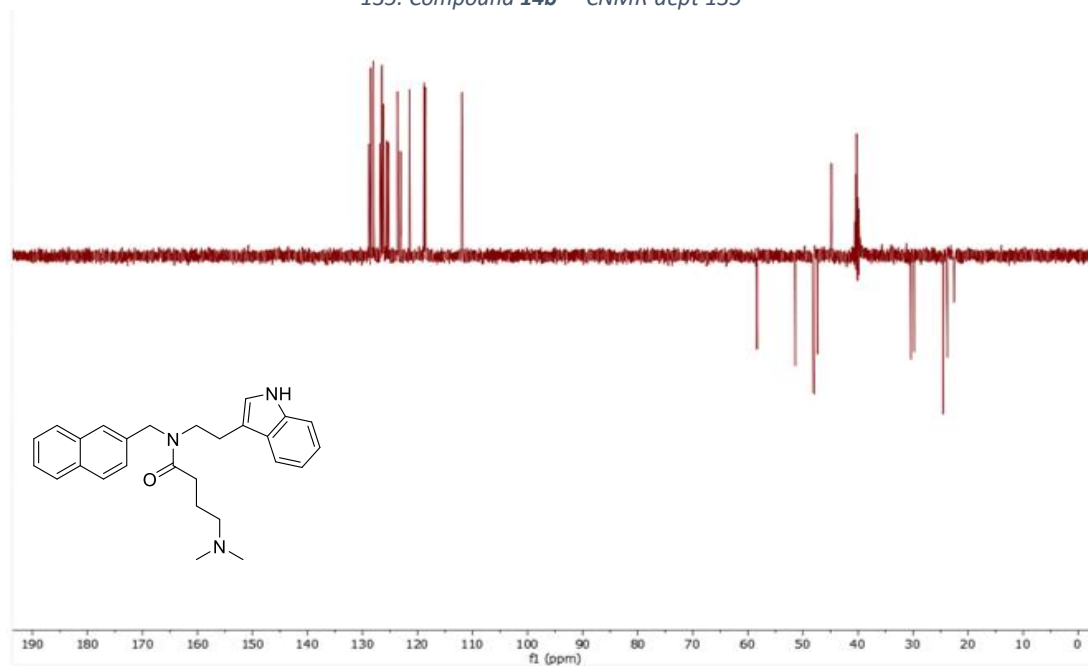

136. Compound **14b** -HSQC

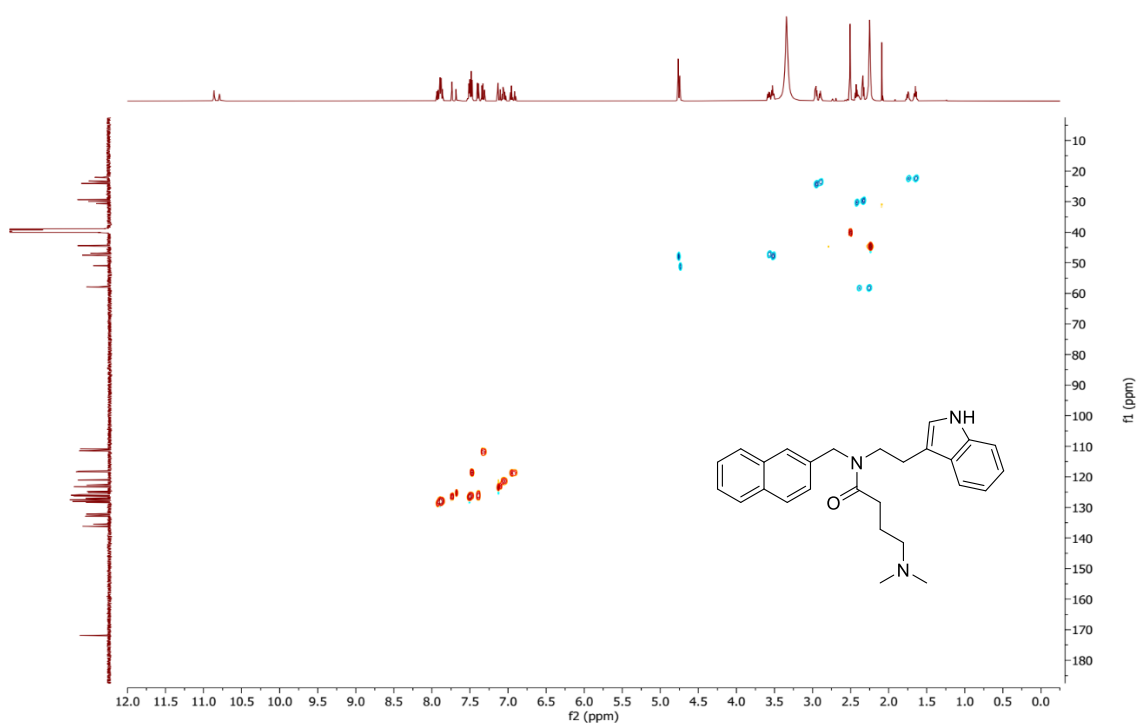

137. Compound **14c**  $^1\text{H}$ NMR

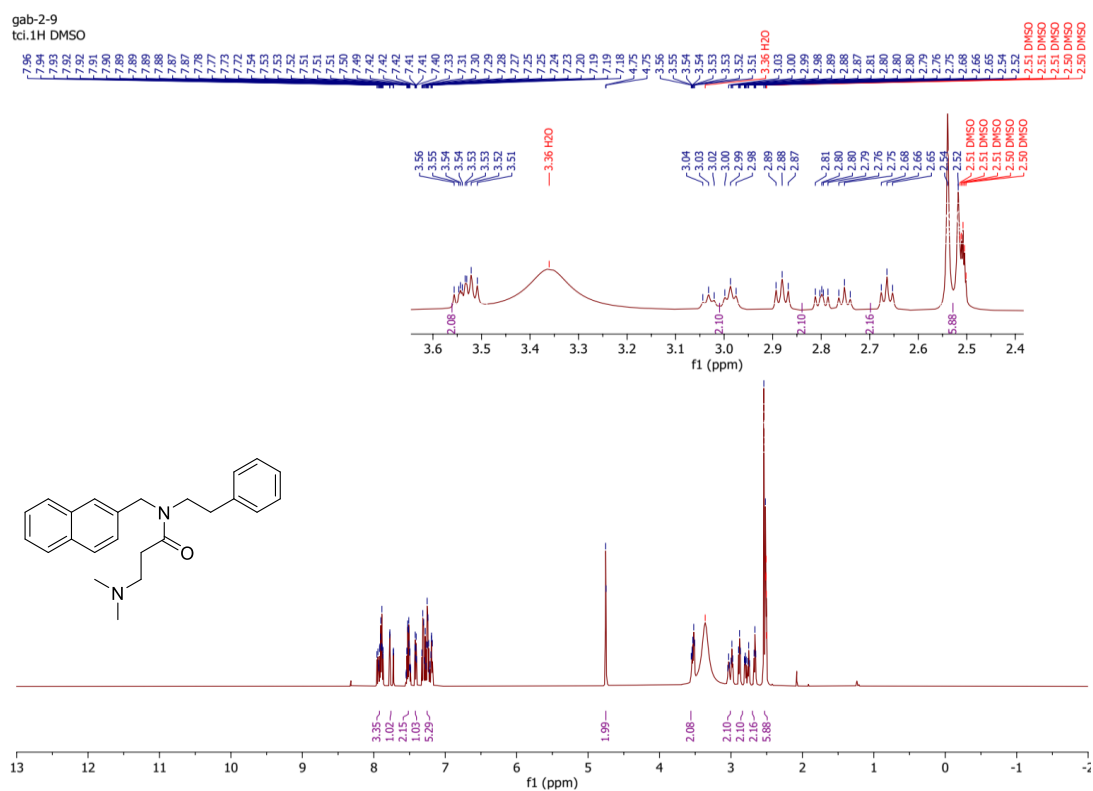

138. Compound **14c**  $^{13}\text{C}$ NMR

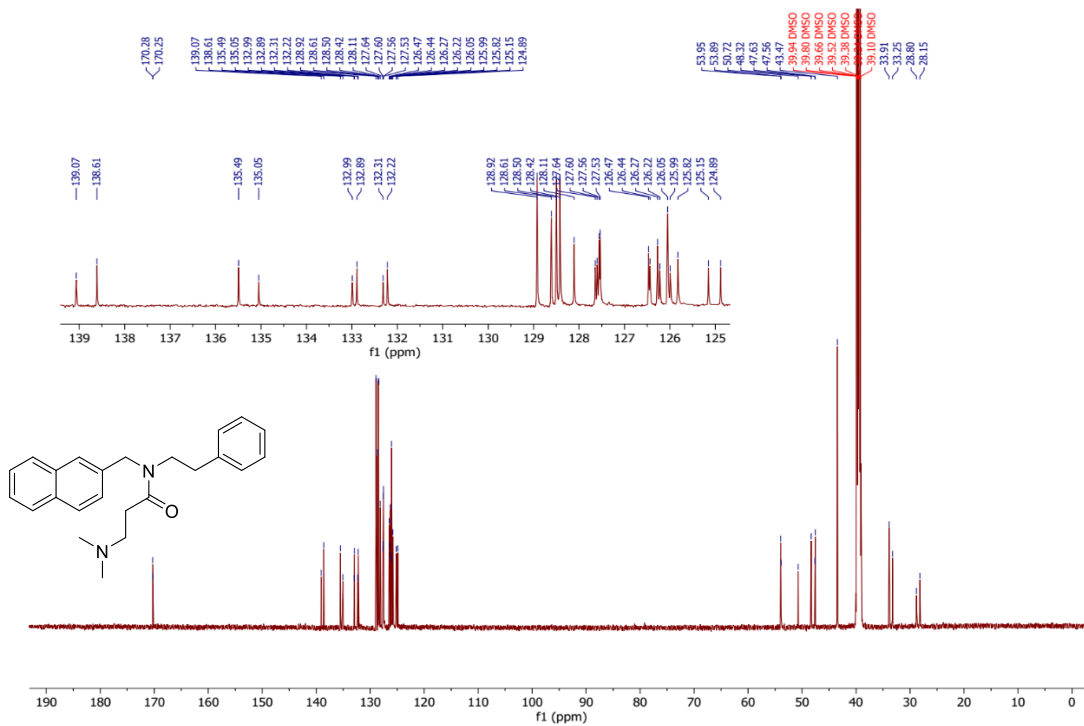

139. Compound **14c** -<sup>13</sup>CNMR-dept 135

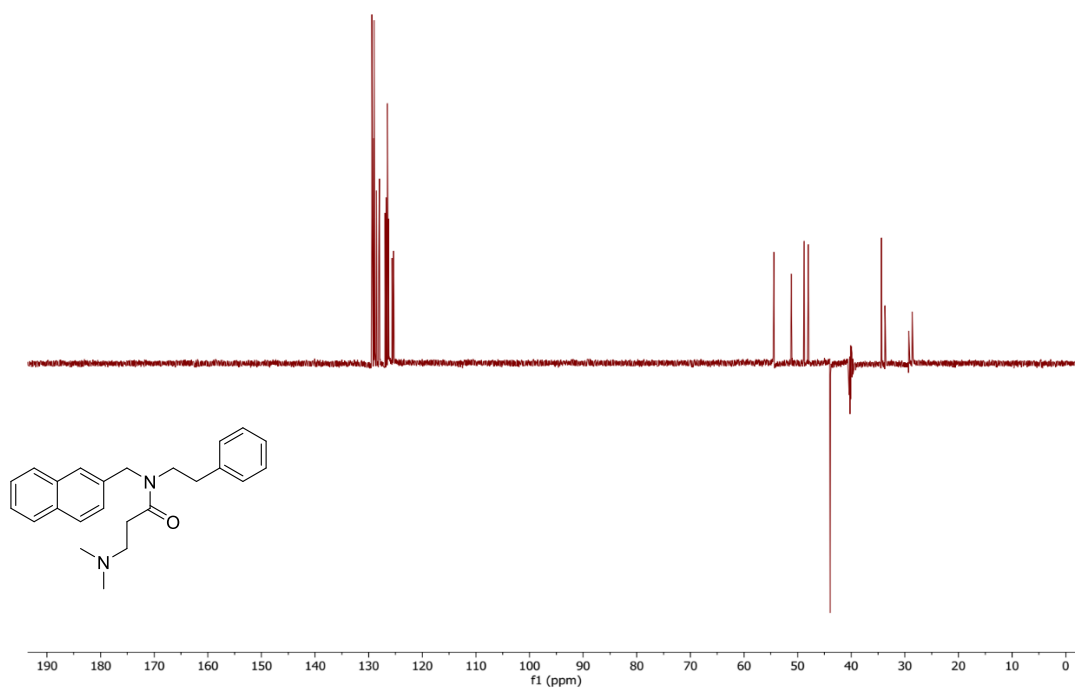

140. Compound **14c** -HSQC

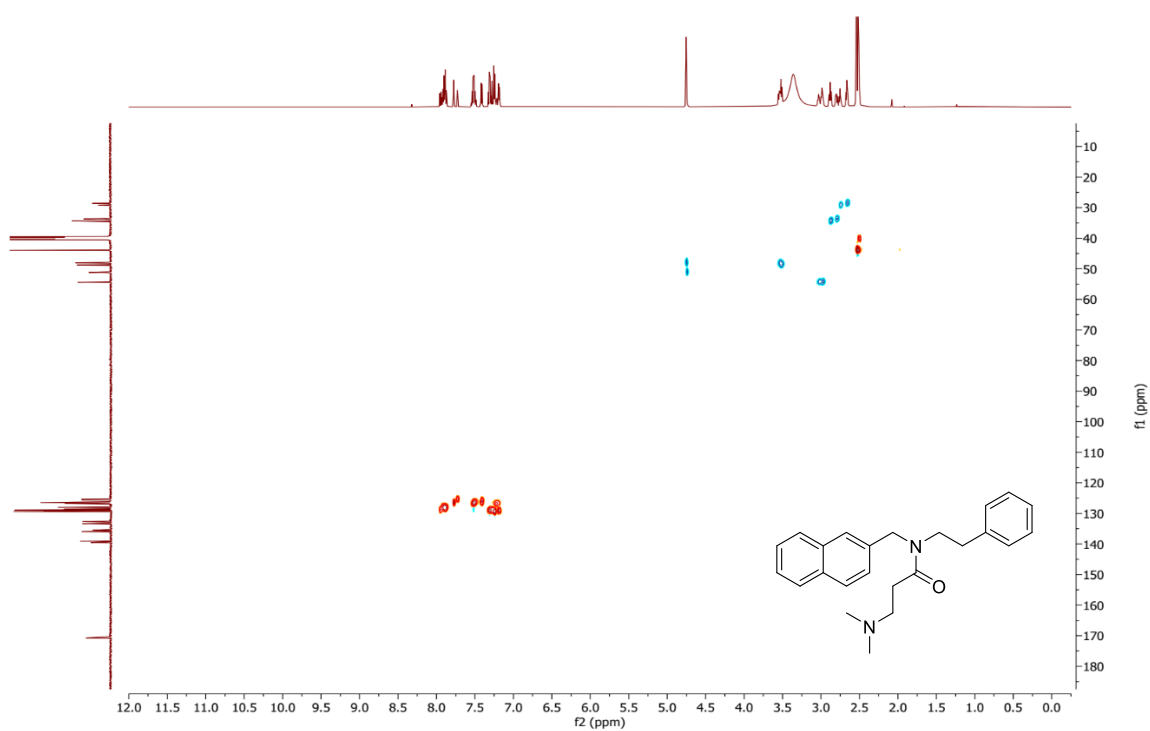

gab-2-10  
tci.1H DMSO

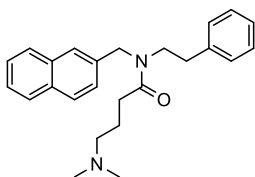

143. Compound **14d** - $^{13}\text{C}$ NMR-dept 135

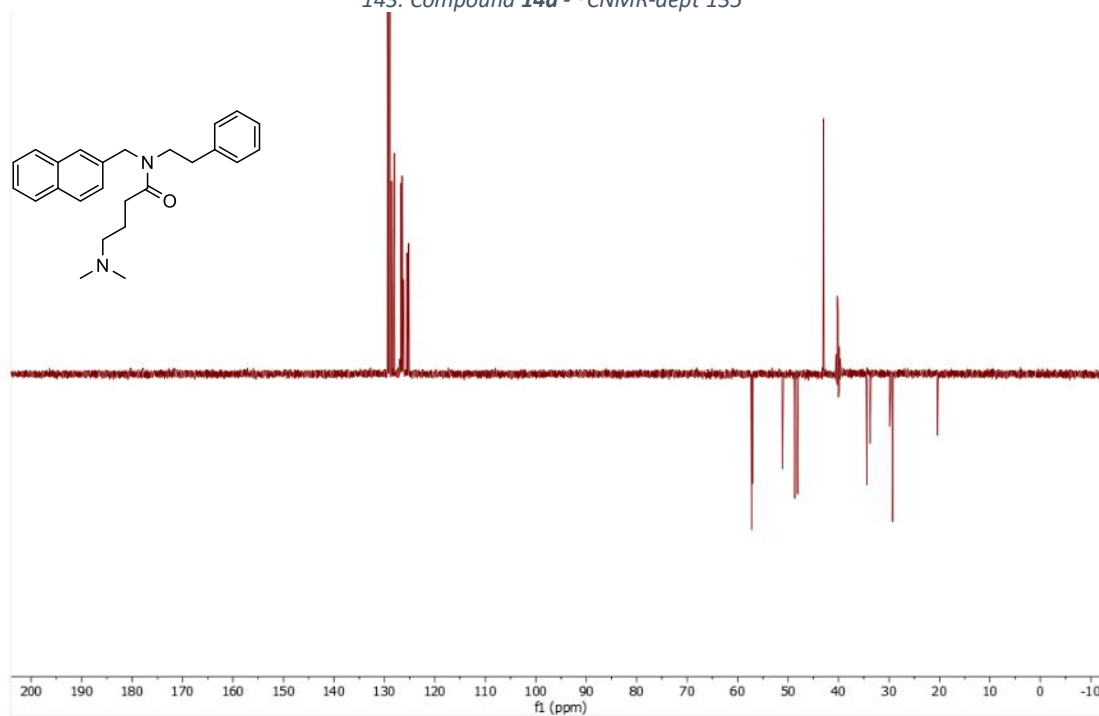

144. Compound **14d** -HSQC

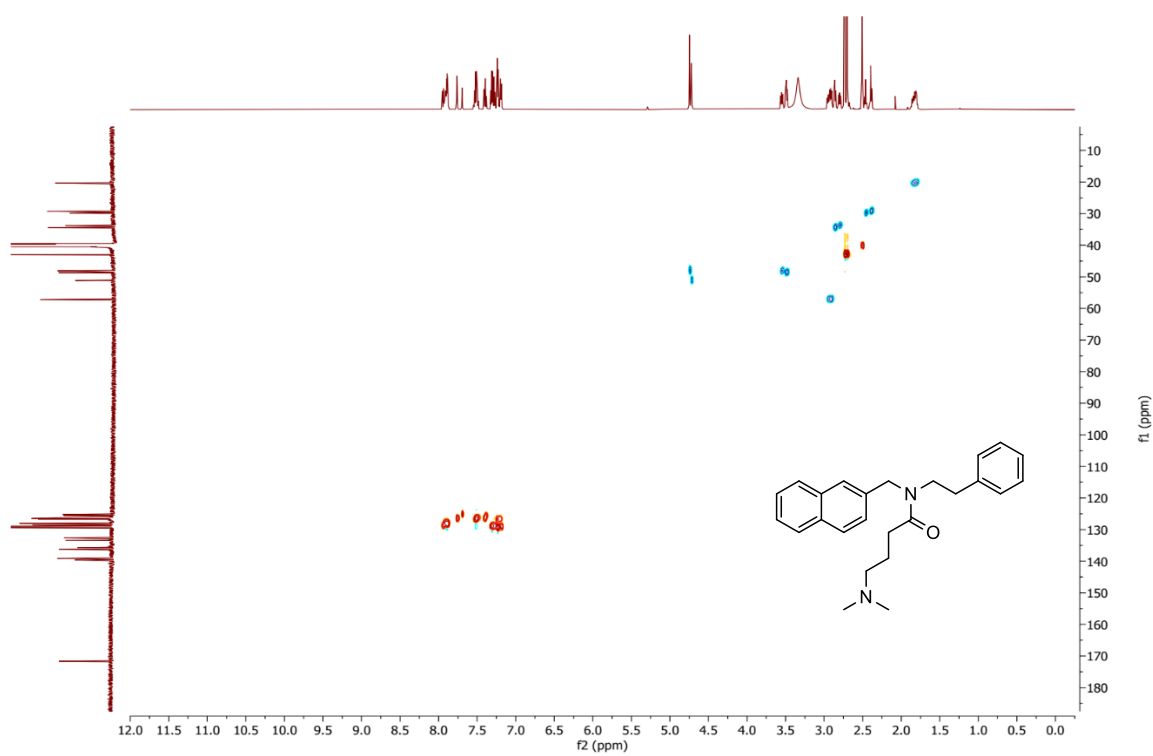

### 13- $^1\text{H}$ , and $^{13}\text{C}$ NMR of tertiary ammonium hydrochloride salts peptoids.

145. Compound **15a**-<sup>1</sup>HNMR

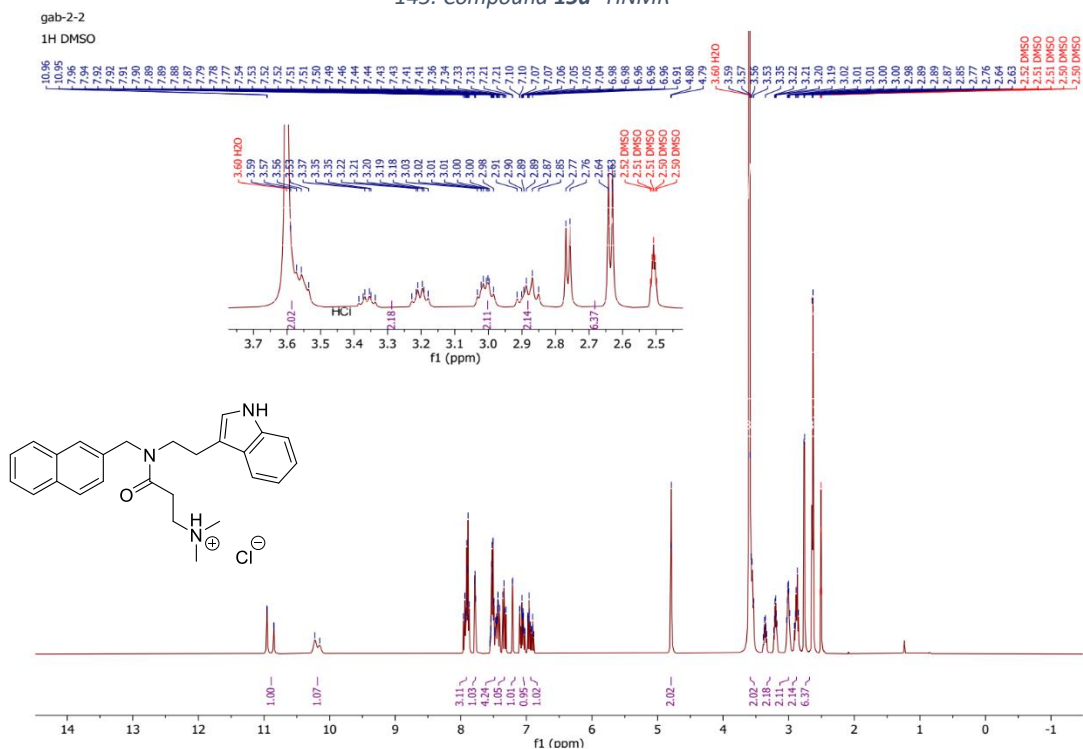

146. Compound **15a** -<sup>13</sup>CNMR

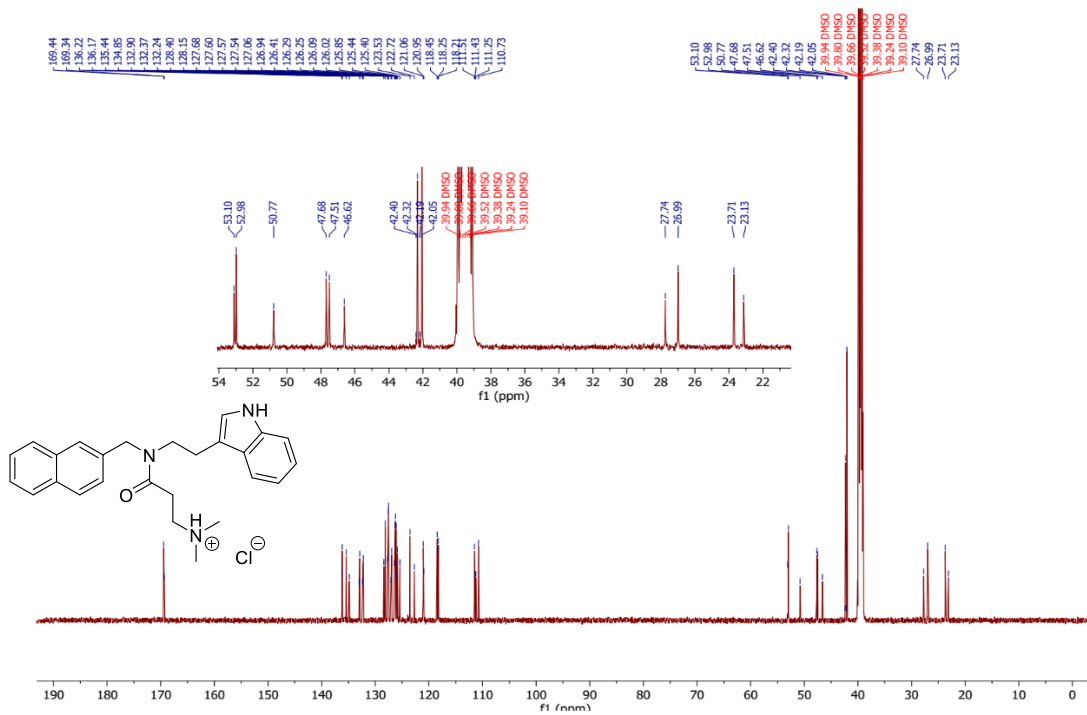



147. Compound **15a** -<sup>13</sup>CNMR-dept 135

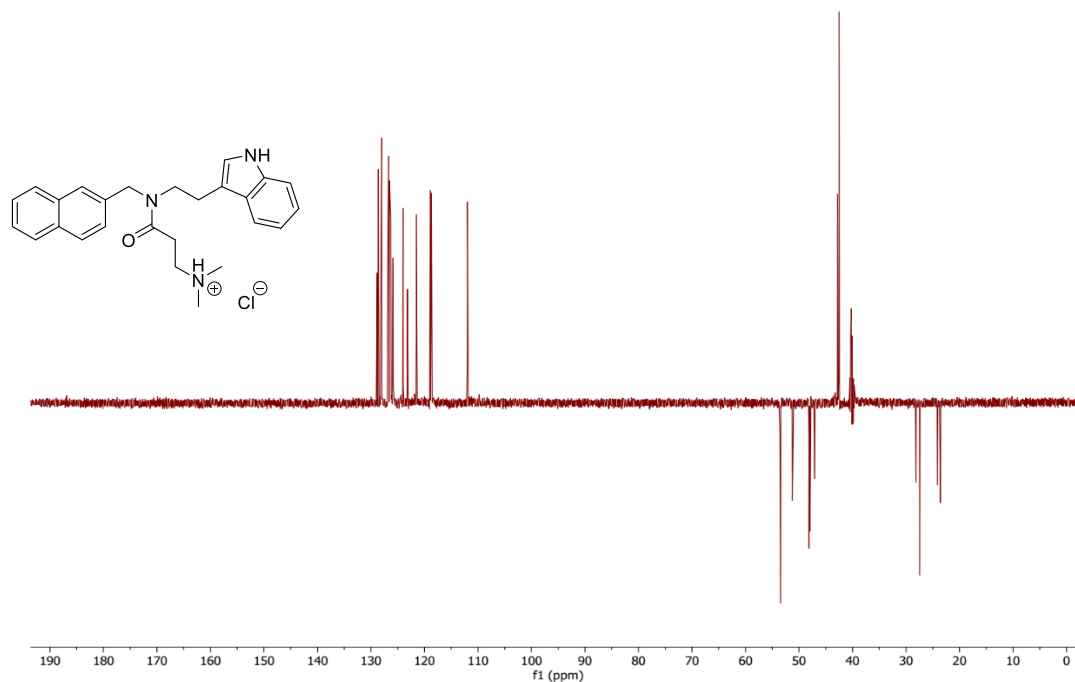

148. Compound **15a** -HSQC

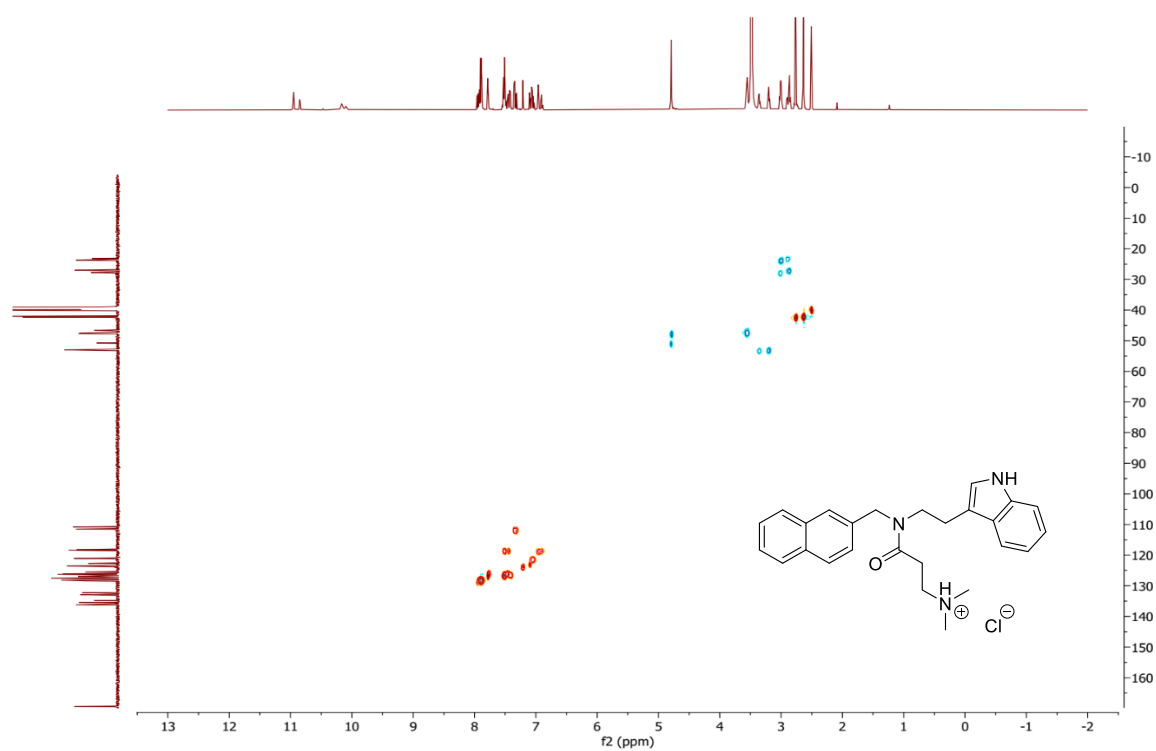

149. Compound **15b** -<sup>1</sup>H NMR

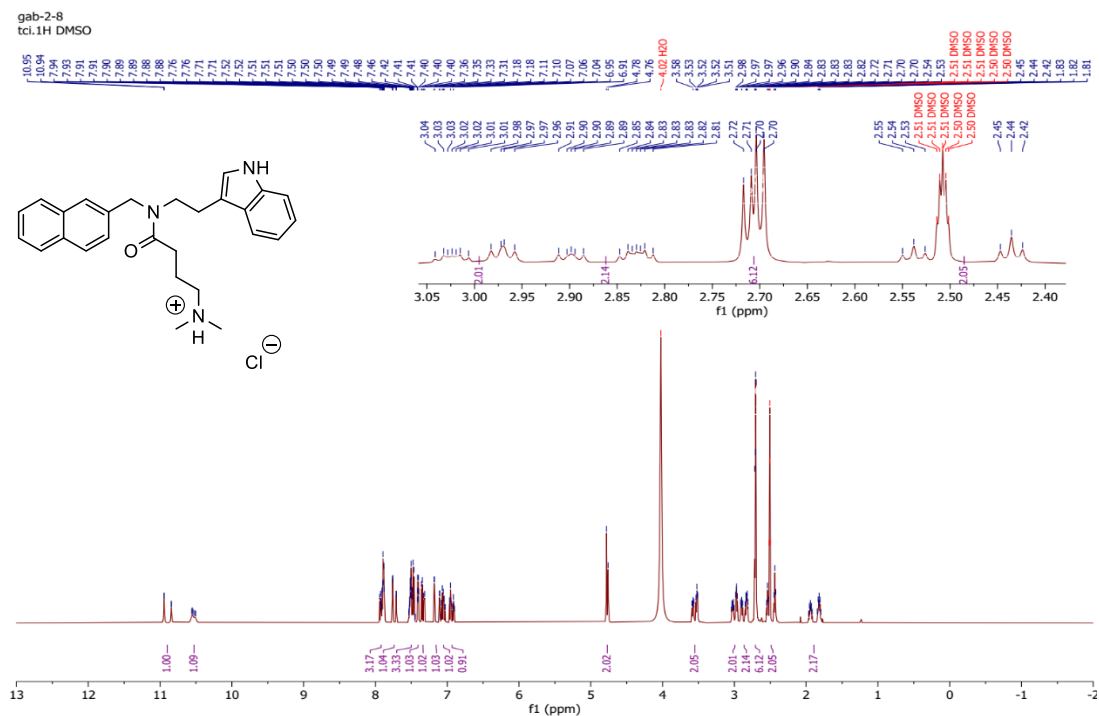

150. Compound **15b** -<sup>13</sup>C NMR

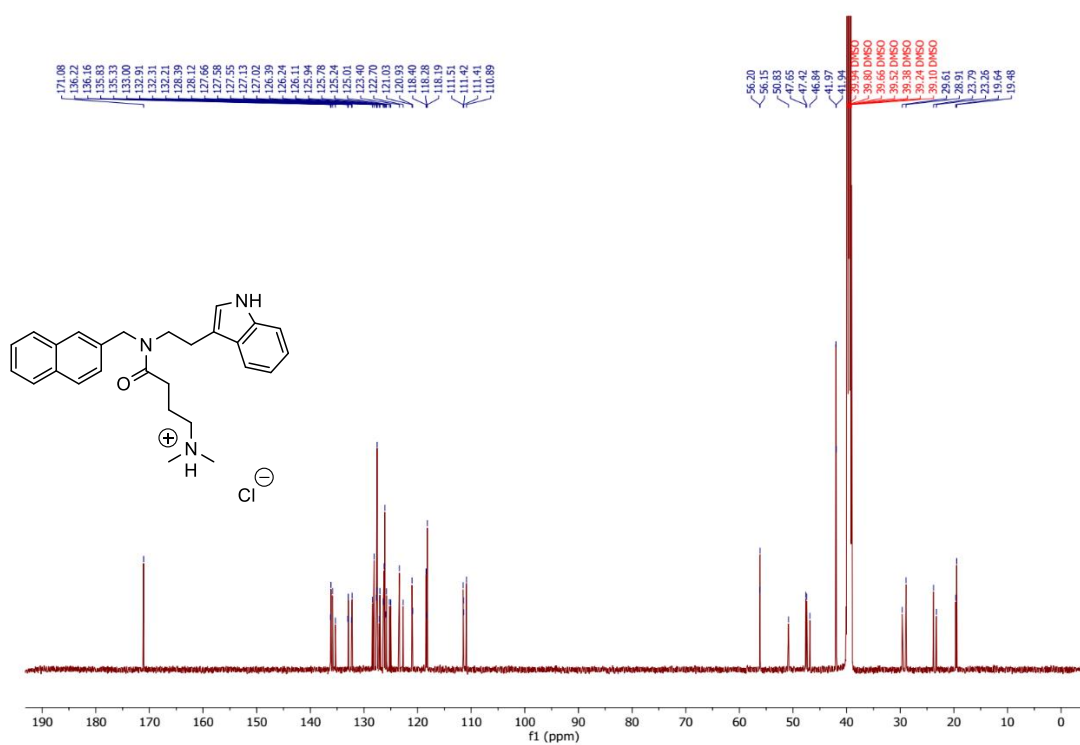

151. Compound **15b** -<sup>13</sup>CNMR-dept 135

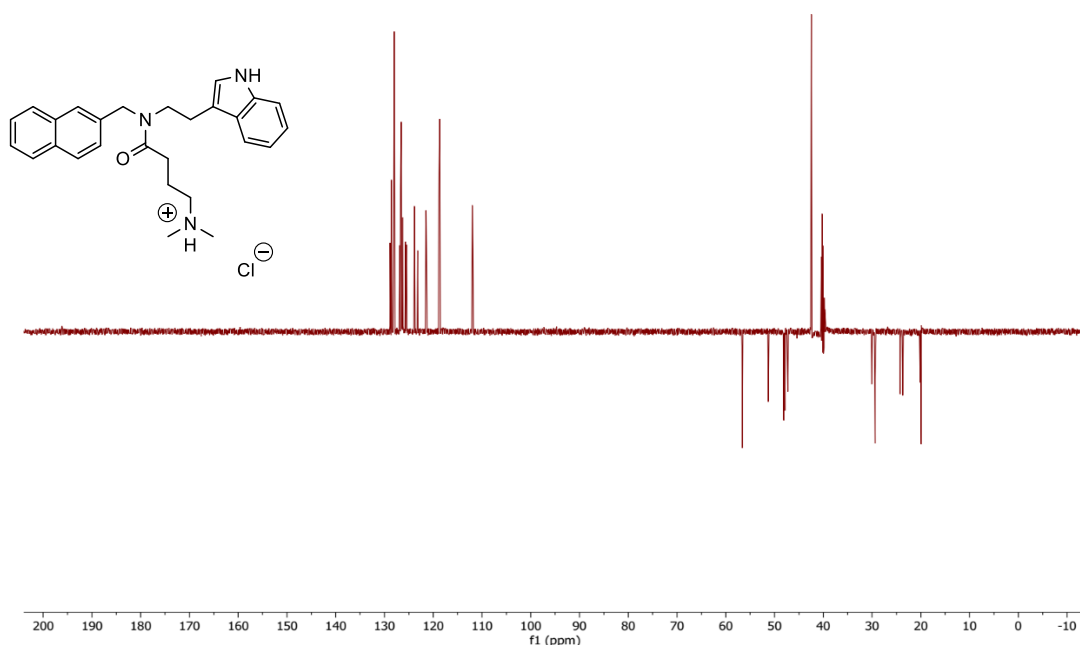

152. Compound **15b** -HSQC

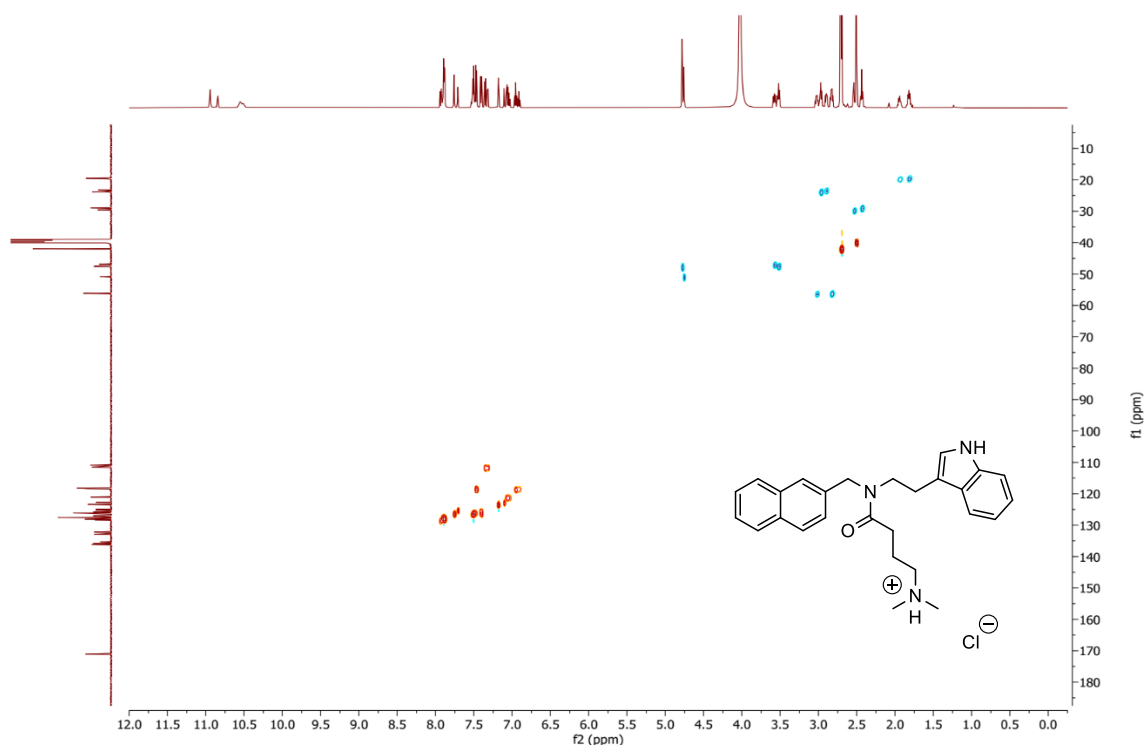

153. Compound **15c**  $^1\text{H}$ NMR

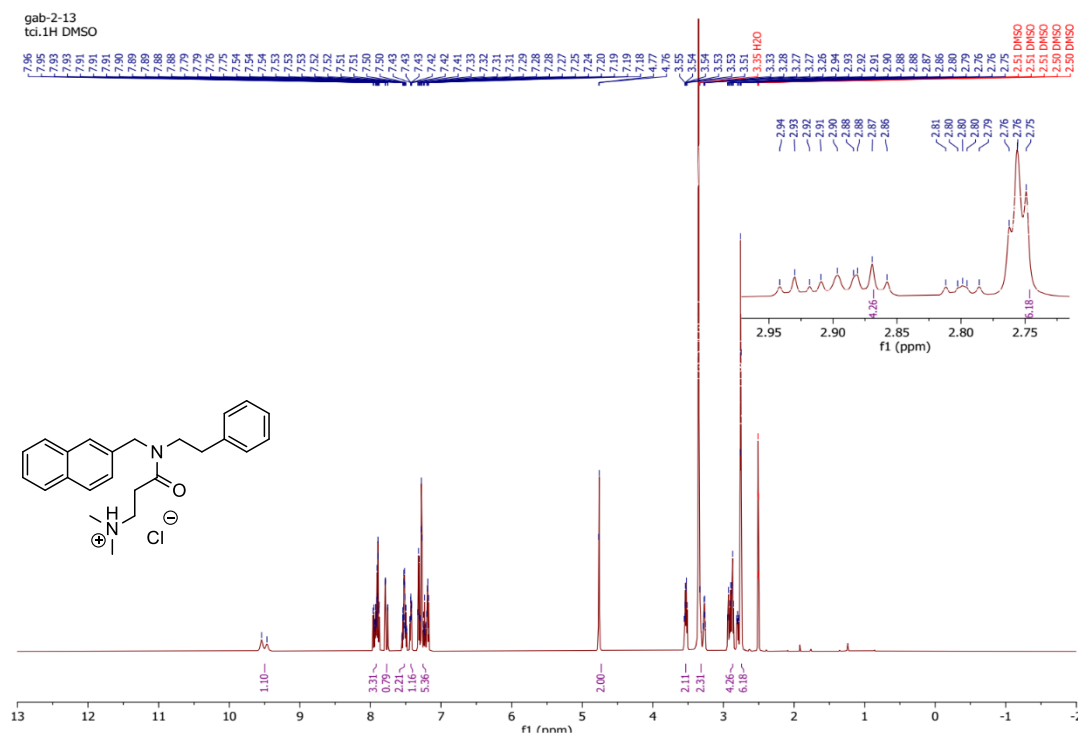

154. Compound **15c**  $^{13}\text{C}$ NMR

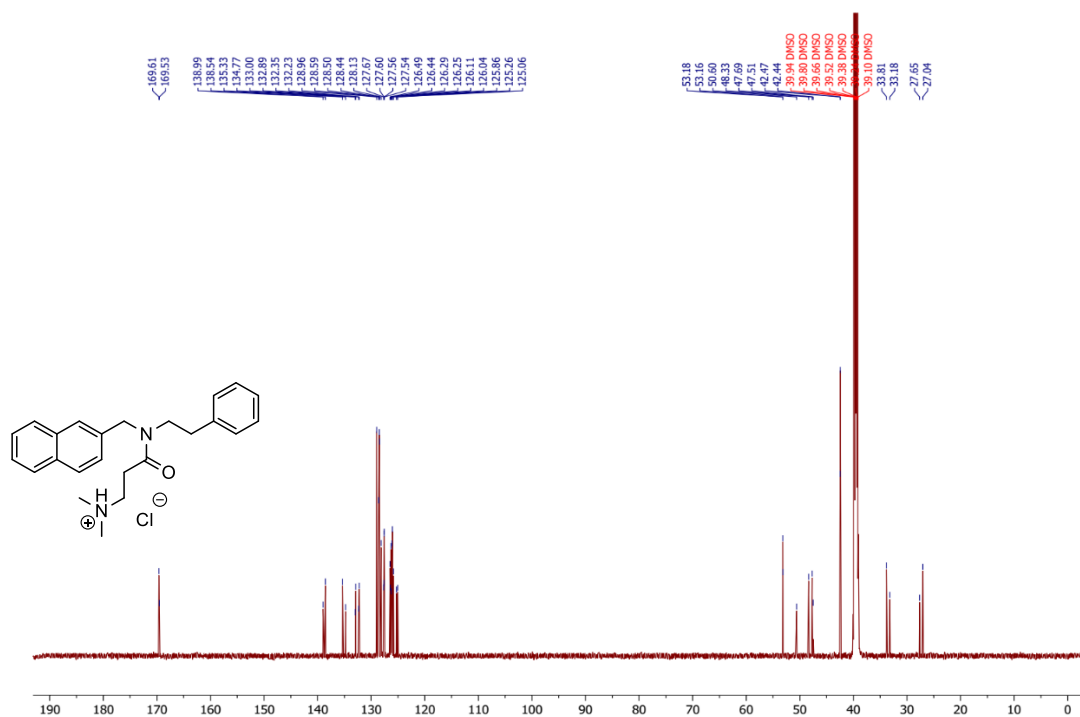

155. Compound **15c** -<sup>13</sup>CNMR-dept 135

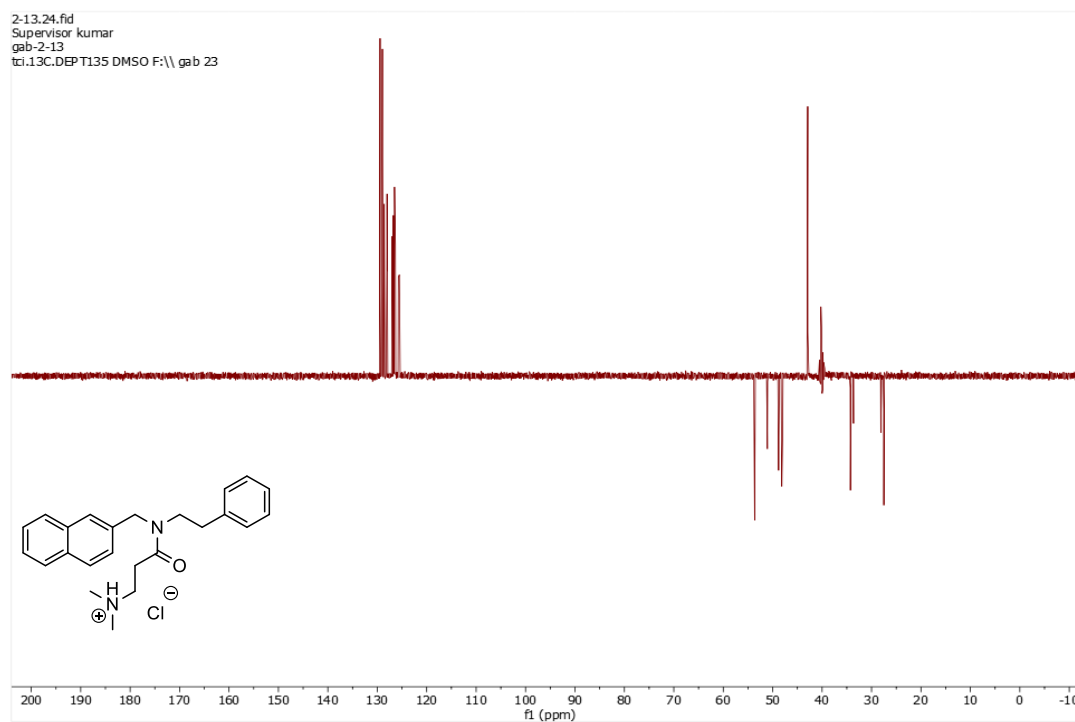

156. Compound **15c** -HSQC

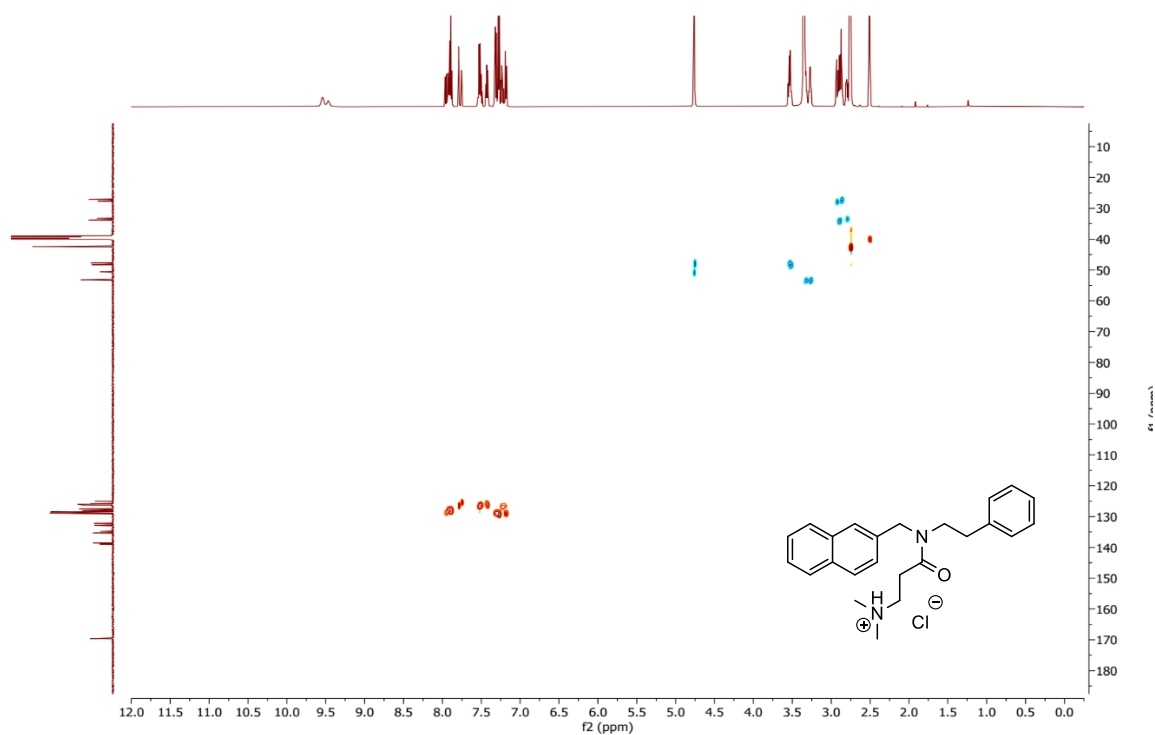

157. Compound **15d**  $^1\text{H}$ NMR

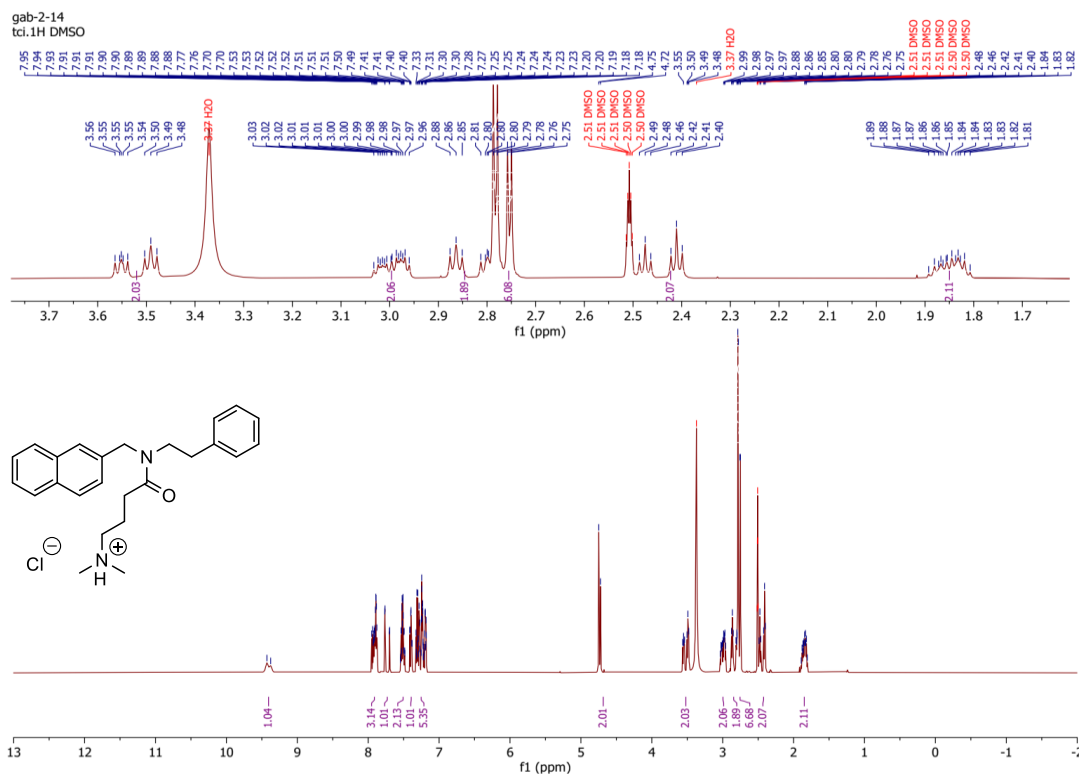

158. Compound **15d**  $^{13}\text{C}$ NMR

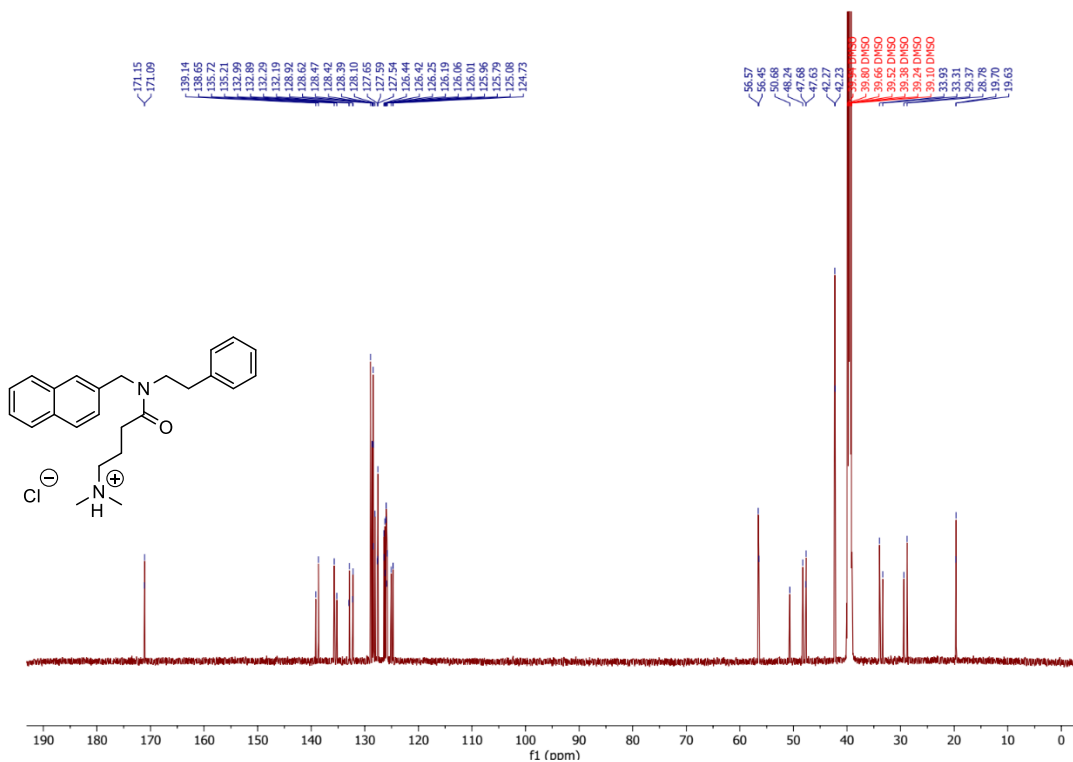

159. Compound **15d** -<sup>13</sup>CNMR-dept 135

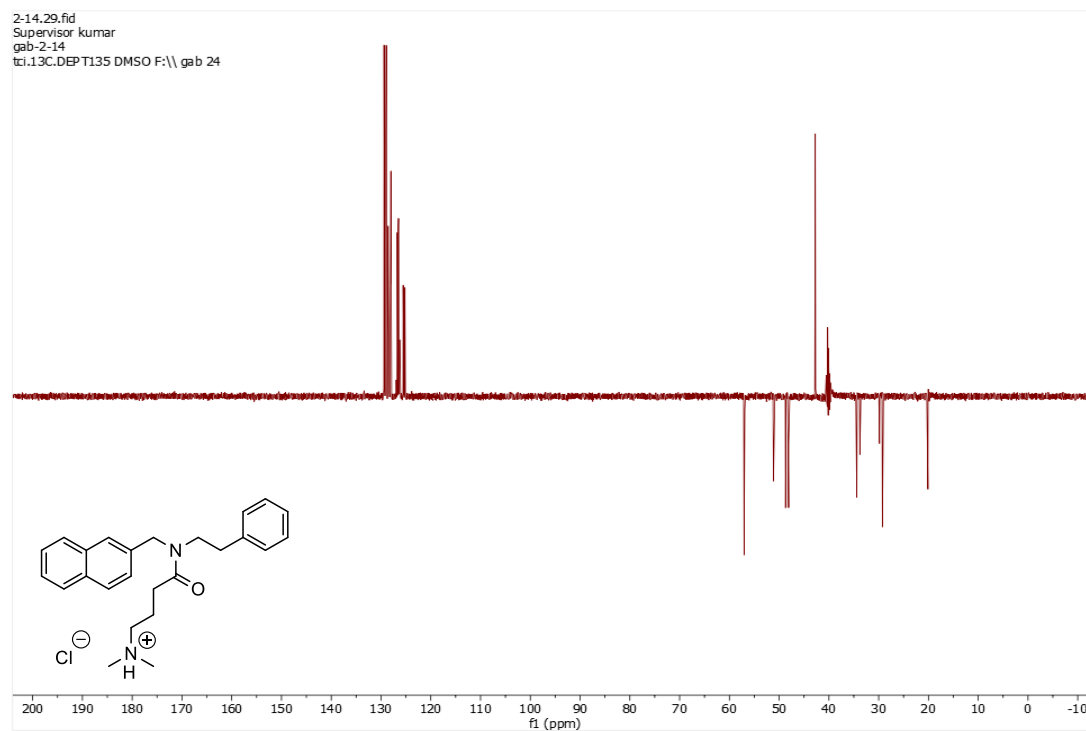

160. Compound **15d** -HSQC

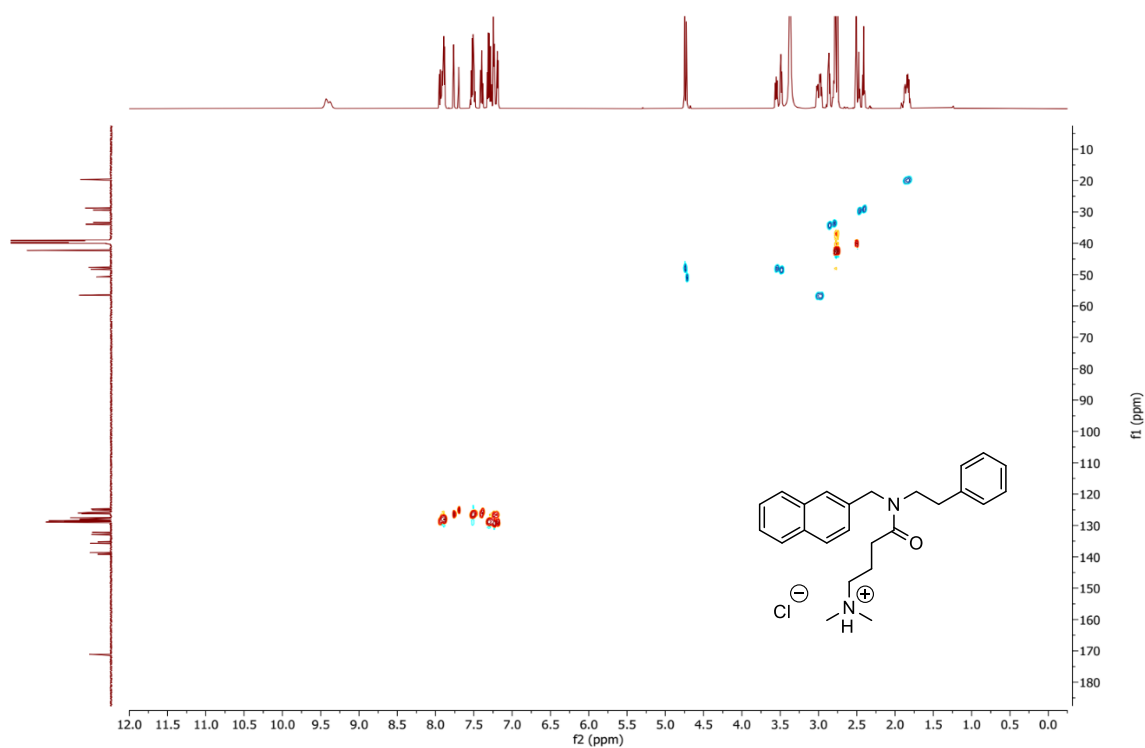

14-  $^1\text{H}$ , and  $^{13}\text{C}$ NMR of quaternary ammonium iodide salts.

161. Compound **16a**  $^1\text{H}$ NMR

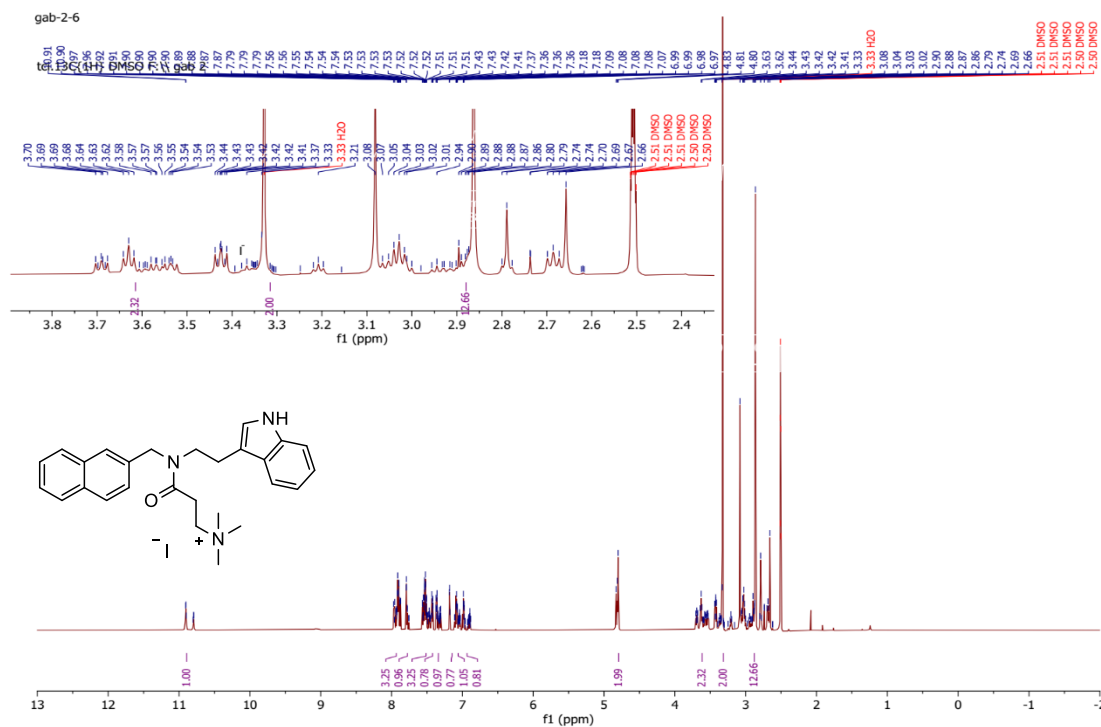



163. Compound **16a** -<sup>13</sup>CNMR-dept 135

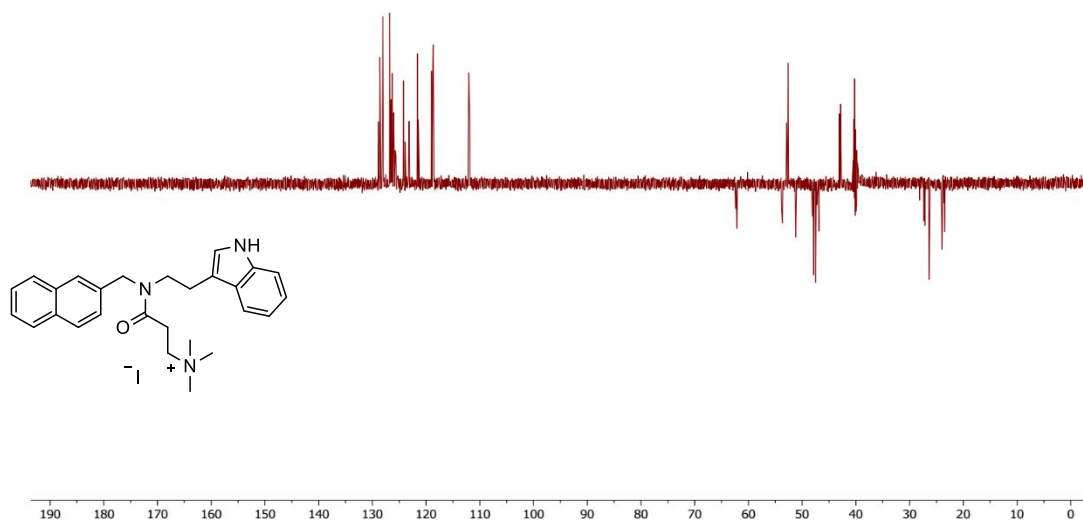

164. Compound **16a** -HSQC

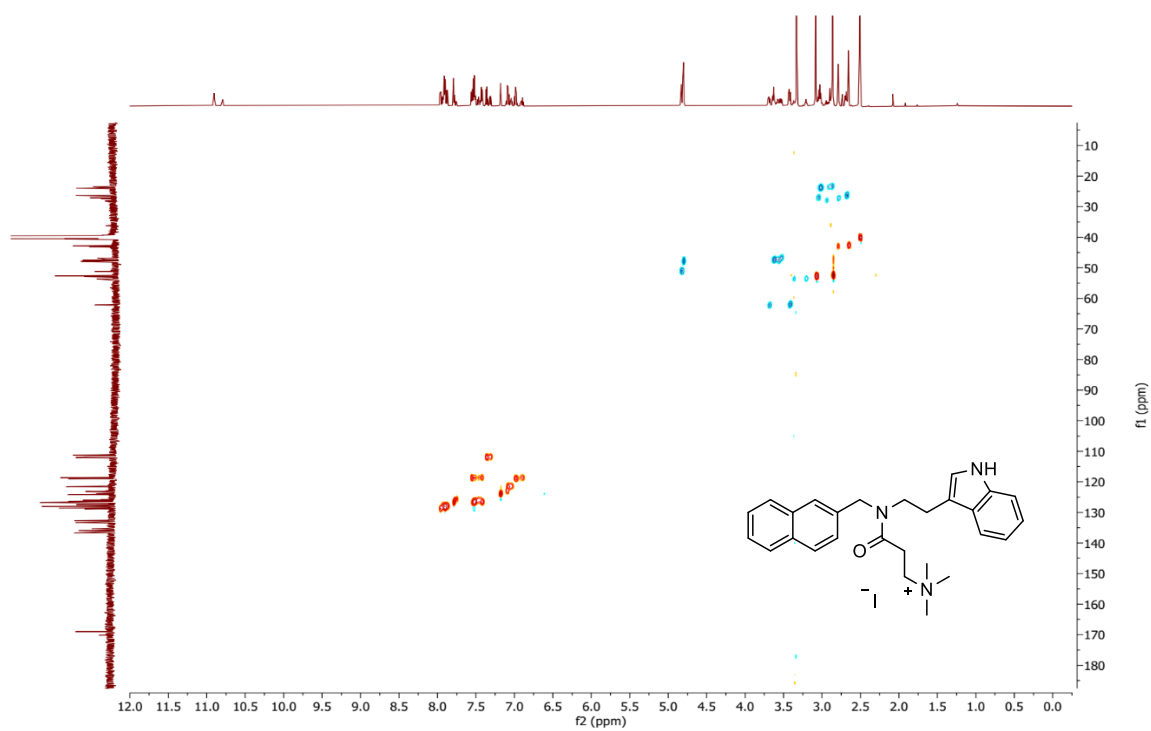

gab-2-12  
tcl.1H DMSO

Chemical structure of compound 12: CN(C)CCCC(=O)NCCc1ccc2ccccc12C#Nc3ccccc3

<sup>1</sup>H NMR spectrum (DMSO-d<sub>6</sub>) of compound 12. The spectrum shows peaks from 2.39 to 10.88 ppm. The inset shows the region from 2.75 to 3.05 ppm.

Chemical structure of compound 12 is shown on the left.

Peak list (ppm): 10.88, 10.86, 10.84, 10.82, 10.80, 10.78, 10.76, 10.74, 10.72, 10.70, 10.68, 10.66, 10.64, 10.62, 10.60, 10.58, 10.56, 10.54, 10.52, 10.50, 10.48, 10.46, 10.44, 10.42, 10.40, 10.38, 10.36, 10.34, 10.32, 10.30, 10.28, 10.26, 10.24, 10.22, 10.20, 10.18, 10.16, 10.14, 10.12, 10.10, 10.08, 10.06, 10.04, 10.02, 10.00, 9.98, 9.96, 9.94, 9.92, 9.90, 9.88, 9.86, 9.84, 9.82, 9.80, 9.78, 9.76, 9.74, 9.72, 9.70, 9.68, 9.66, 9.64, 9.62, 9.60, 9.58, 9.56, 9.54, 9.52, 9.50, 9.48, 9.46, 9.44, 9.42, 9.40, 9.38, 9.36, 9.34, 9.32, 9.30, 9.28, 9.26, 9.24, 9.22, 9.20, 9.18, 9.16, 9.14, 9.12, 9.10, 9.08, 9.06, 9.04, 9.02, 9.00, 8.98, 8.96, 8.94, 8.92, 8.90, 8.88, 8.86, 8.84, 8.82, 8.80, 8.78, 8.76, 8.74, 8.72, 8.70, 8.68, 8.66, 8.64, 8.62, 8.60, 8.58, 8.56, 8.54, 8.52, 8.50, 8.48, 8.46, 8.44, 8.42, 8.40, 8.38, 8.36, 8.34, 8.32, 8.30, 8.28, 8.26, 8.24, 8.22, 8.20, 8.18, 8.16, 8.14, 8.12, 8.10, 8.08, 8.06, 8.04, 8.02, 8.00, 7.98, 7.96, 7.94, 7.92, 7.90, 7.88, 7.86, 7.84, 7.82, 7.80, 7.78, 7.76, 7.74, 7.72, 7.70, 7.68, 7.66, 7.64, 7.62, 7.60, 7.58, 7.56, 7.54, 7.52, 7.50, 7.48, 7.46, 7.44, 7.42, 7.40, 7.38, 7.36, 7.34, 7.32, 7.30, 7.28, 7.26, 7.24, 7.22, 7.20, 7.18, 7.16, 7.14, 7.12, 7.10, 7.08, 7.06, 7.04, 7.02, 7.00, 6.98, 6.96, 6.94, 6.92, 6.90, 6.88, 6.86, 6.84, 6.82, 6.80, 6.78, 6.76, 6.74, 6.72, 6.70, 6.68, 6.66, 6.64, 6.62, 6.60, 6.58, 6.56, 6.54, 6.52, 6.50, 6.48, 6.46, 6.44, 6.42, 6.40, 6.38, 6.36, 6.34, 6.32, 6.30, 6.28, 6.26, 6.24, 6.22, 6.20, 6.18, 6.16, 6.14, 6.12, 6.10, 6.08, 6.06, 6.04, 6.02, 6.00, 5.98, 5.96, 5.94, 5.92, 5.90, 5.88, 5.86, 5.84, 5.82, 5.80, 5.78, 5.76, 5.74, 5.72, 5.70, 5.68, 5.66, 5.64, 5.62, 5.60, 5.58, 5.56, 5.54, 5.52, 5.50, 5.48, 5.46, 5.44, 5.42, 5.40, 5.38, 5.36, 5.34, 5.32, 5.30, 5.28, 5.26, 5.24, 5.22, 5.20, 5.18, 5.16, 5.14, 5.12, 5.10, 5.08, 5.06, 5.04, 5.02, 5.00, 4.98, 4.96, 4.94, 4.92, 4.90, 4.88, 4.86, 4.84, 4.82, 4.80, 4.78, 4.76, 4.74, 4.72, 4.70, 4.68, 4.66, 4.64, 4.62, 4.60, 4.58, 4.56, 4.54, 4.52, 4.50, 4.48, 4.46, 4.44, 4.42, 4.40, 4.38, 4.36, 4.34, 4.32, 4.30, 4.28, 4.26, 4.24, 4.22, 4.20, 4.18, 4.16, 4.14, 4.12, 4.10, 4.08, 4.06, 4.04, 4.02, 4.00, 3.98, 3.96, 3.94, 3.92, 3.90, 3.88, 3.86, 3.84, 3.82, 3.80, 3.78, 3.76, 3.74, 3.72, 3.70, 3.68, 3.66, 3.64, 3.62, 3.60, 3.58, 3.56, 3.54, 3.52, 3.50, 3.48, 3.46, 3.44, 3.42, 3.40, 3.38, 3.36, 3.34, 3.32, 3.30, 3.28, 3.26, 3.24, 3.22, 3.20, 3.18, 3.16, 3.14, 3.12, 3.10, 3.08, 3.06, 3.04, 3.02, 3.00, 2.98, 2.96, 2.94, 2.92, 2.90, 2.88, 2.86, 2.84, 2.82, 2.80, 2.78, 2.76, 2.74, 2.72, 2.70, 2.68, 2.66, 2.64, 2.62, 2.60, 2.58, 2.56, 2.54, 2.52, 2.50, 2.48, 2.46, 2.44, 2.42, 2.40, 2.38, 2.36, 2.34, 2.32, 2.30, 2.28, 2.26, 2.24, 2.22, 2.20, 2.18, 2.16, 2.14, 2.12, 2.10, 2.08, 2.06, 2.04, 2.02, 2.00, 1.98, 1.96, 1.94, 1.92, 1.90, 1.88, 1.86, 1.84, 1.82, 1.80, 1.78, 1.76, 1.74, 1.72, 1.70, 1.68, 1.66, 1.64, 1.62, 1.60, 1.58, 1.56, 1.54, 1.52, 1.50, 1.48, 1.46, 1.44, 1.42, 1.40, 1.38, 1.36, 1.34, 1.32, 1.30, 1.28, 1.26, 1.24, 1.22, 1.20, 1.18, 1.16, 1.14, 1.12, 1.10, 1.08, 1.06, 1.04, 1.02, 1.00, 0.98, 0.96, 0.94, 0.92, 0.90, 0.88, 0.86, 0.84, 0.82, 0.80, 0.78, 0.76, 0.74, 0.72, 0.70, 0.68, 0.66, 0.64, 0.62, 0.60, 0.58, 0.56, 0.54, 0.52, 0.50, 0.48, 0.46, 0.44, 0.42, 0.40, 0.38, 0.36, 0.34, 0.32, 0.30, 0.28, 0.26, 0.24, 0.22, 0.20, 0.18, 0.16, 0.14, 0.12, 0.10, 0.08, 0.06, 0.04, 0.02, 0.00, -0.02, -0.04, -0.06, -0.08, -0.10, -0.12, -0.14, -0.16, -0.18, -0.20, -0.22, -0.24, -0.26, -0.28, -0.30, -0.32, -0.34, -0.36, -0.38, -0.40, -0.42, -0.44, -0.46, -0.48, -0.50, -0.52, -0.54, -0.56, -0.58, -0.60, -0.62, -0.64, -0.66, -0.68, -0.70, -0.72, -0.74, -0.76, -0.78, -0.80, -0.82, -0.84, -0.86, -0.88, -0.90, -0.92, -0.94, -0.96, -0.98, -1.00, -1.02, -1.04, -1.06, -1.08, -1.10, -1.12, -1.14, -1.16, -1.18, -1.20, -1.22, -1.24, -1.26, -1.28, -1.30, -1.32, -1.34, -1.36, -1.38, -1.40, -1.42, -1.44, -1.46, -1.48, -1.50, -1.52, -1.54, -1.56, -1.58, -1.60, -1.62, -1.64, -1.66, -1.68, -1.70, -1.72, -1.74, -1.76, -1.78, -1.80, -1.82, -

Chemical structure of compound 10: CN(C)CCN(Cc1c[nH]c2ccccc12)C(=O)CCc3cccc4ccccc34

<sup>13</sup>C NMR spectrum (DMSO-d<sub>6</sub>) of compound 10. The spectrum shows peaks from 18.05 to 170.81 ppm. The chemical structure of compound 10 is shown, which is N-(2-(2-(dimethylammonio)ethyl)-5H-indol-5-yl)-2-(naphthalen-1-yl)ethanimine.

Peak list (ppm):

- 170.81, 170.73, 136.20, 136.13, 135.77, 135.77, 135.29, 132.88, 132.29, 132.29, 128.41, 128.41, 128.11, 127.61, 127.58, 127.58, 127.58, 127.50, 127.50, 127.12, 127.12, 126.99, 126.99, 126.41, 126.41, 126.24, 126.24, 126.09, 125.95, 125.79, 125.79, 125.36, 125.36, 123.32, 123.32, 122.69, 122.69, 120.94, 120.94, 118.25, 118.25, 118.19, 118.19, 113.39, 113.39, 110.89, 110.89, 123.39, 123.39, 123.36, 123.36, 122.69, 122.69, 121.09, 121.09, 120.94, 120.94, 118.44, 118.44, 118.19, 118.19, 64.95, 64.95, 52.24, 52.24, 52.22, 52.22, 52.19, 52.19, 50.80, 50.80, 48.31, 48.31, 47.94, 47.94, 42.35, 42.35, 39.59, 39.59, 39.56, 39.56, 39.52, 39.52, 39.28, 39.28, 39.28, 39.28, 39.10, 39.10, 29.10, 29.10, 28.78, 28.78, 28.43, 28.43, 27.78, 27.78, 19.65, 19.65, 18.20, 18.20, 18.05, 18.05.

167. Compound **16b** -<sup>13</sup>CNMR-dept 135

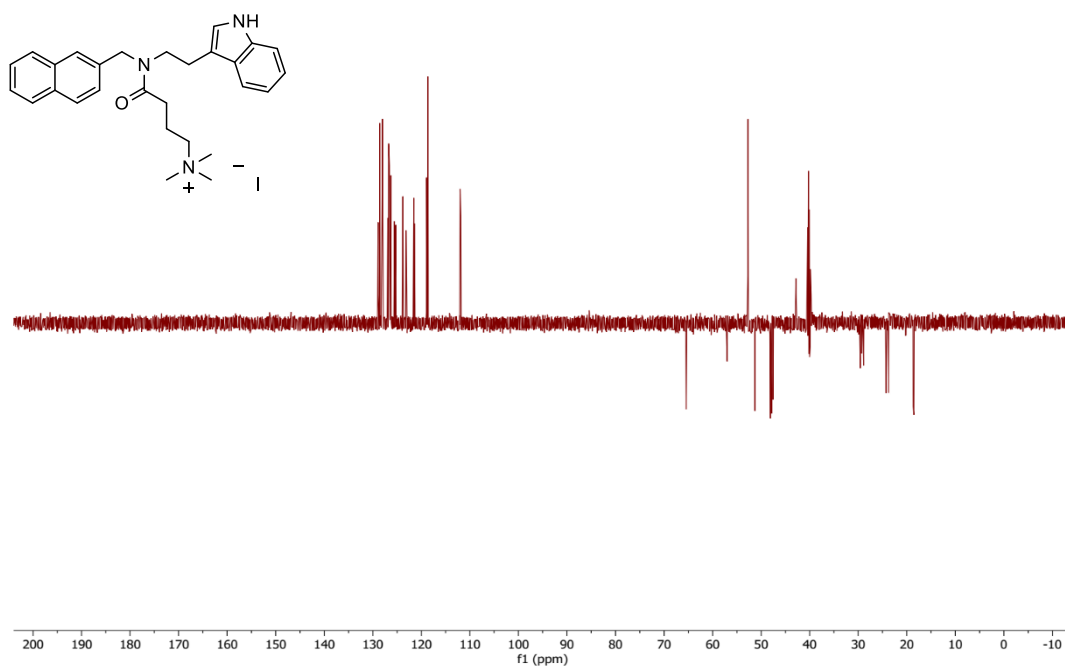

168. Compound **16b** -HSQC

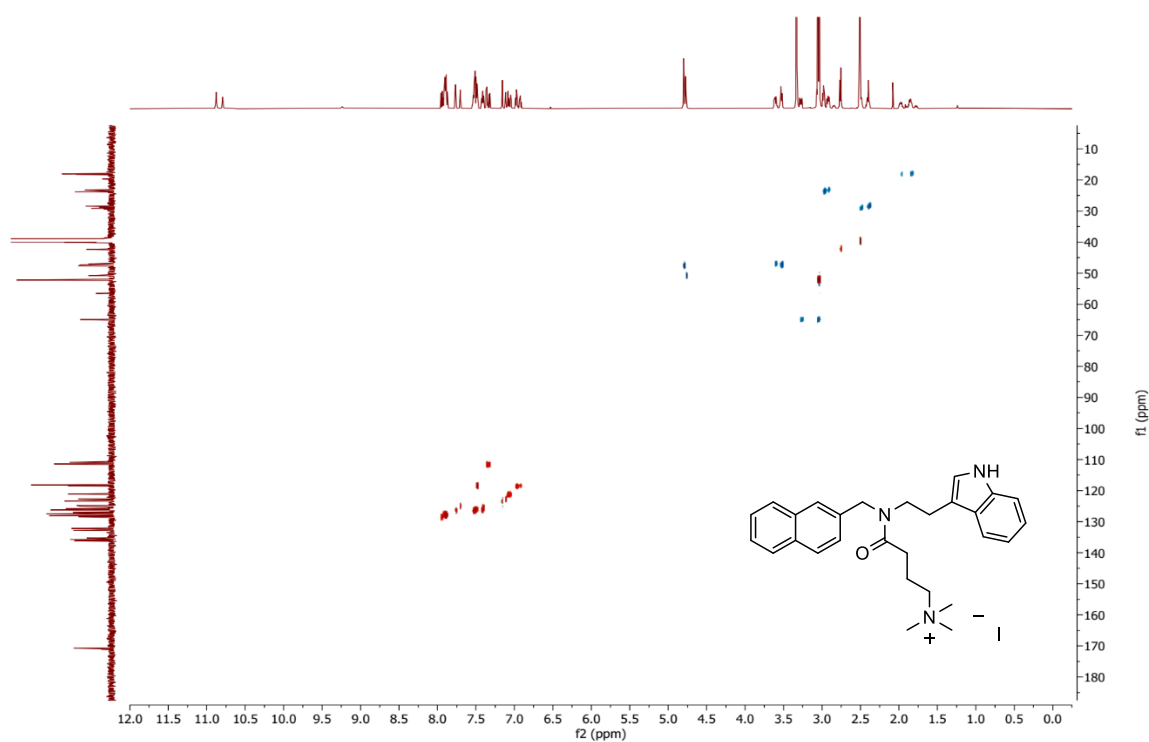

169. Compound **16c** -<sup>1</sup>HNMR

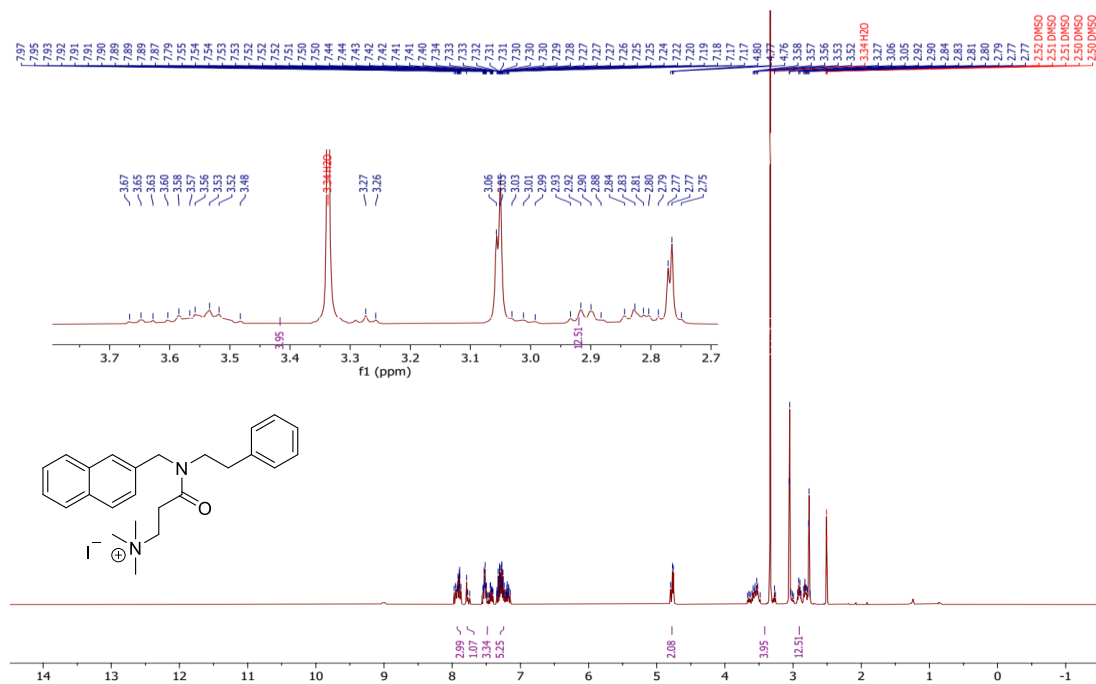

170. Compound **16c** -<sup>13</sup>CNMR

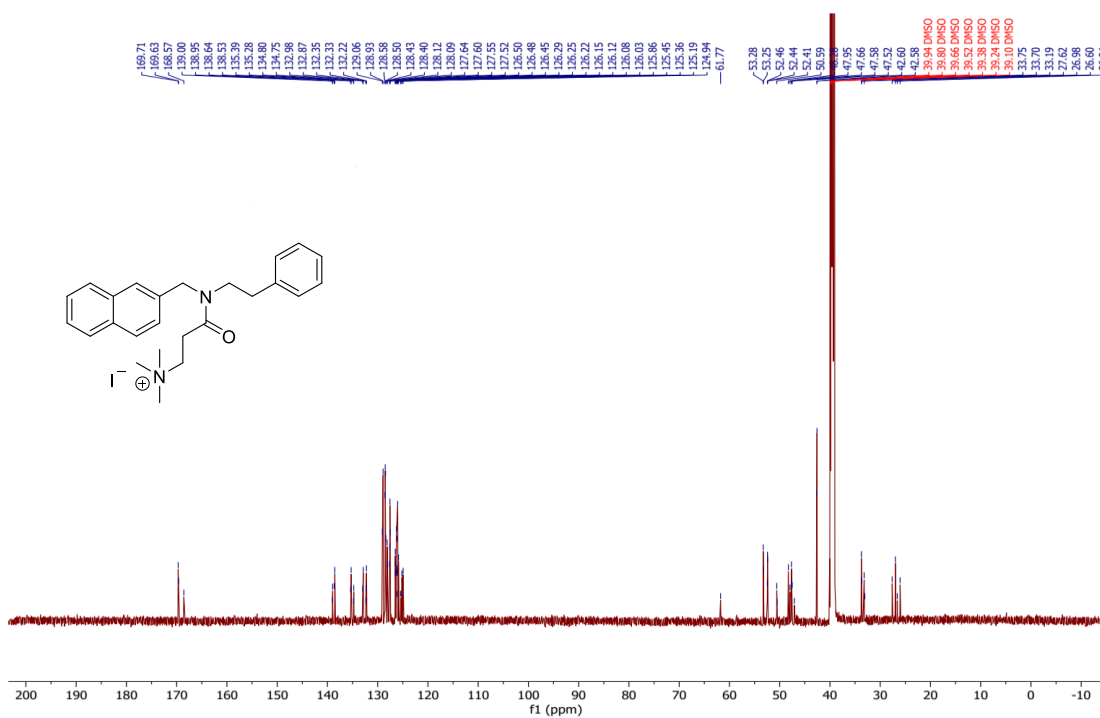

171. Compound **16c**- $^{13}\text{C}$ NMR-dept 135

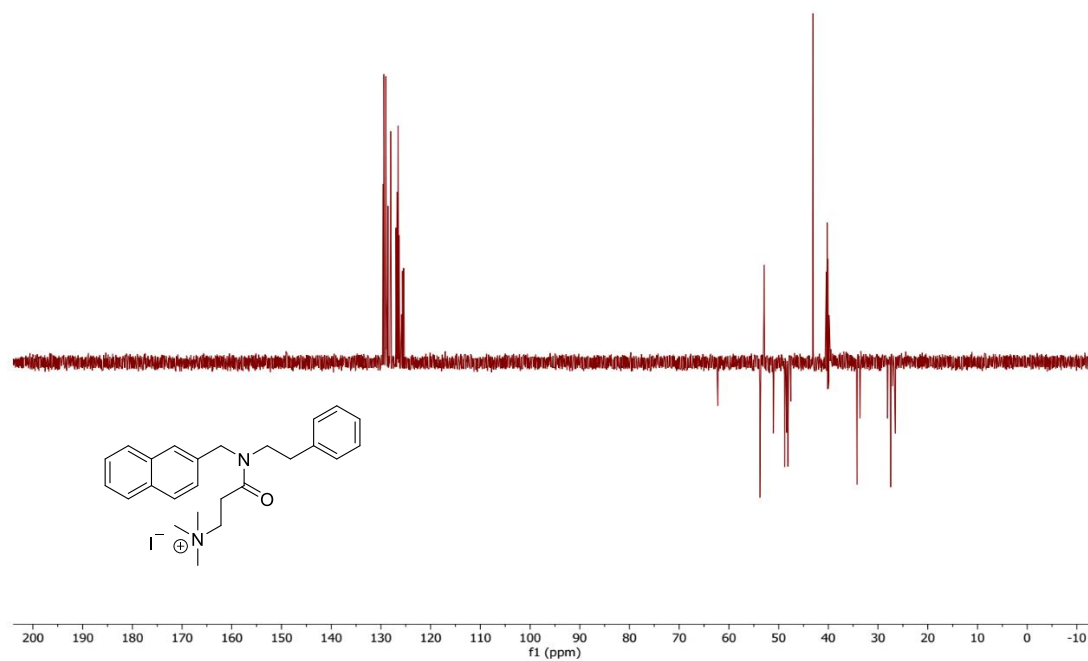

172. Compound **16c** -HSQC

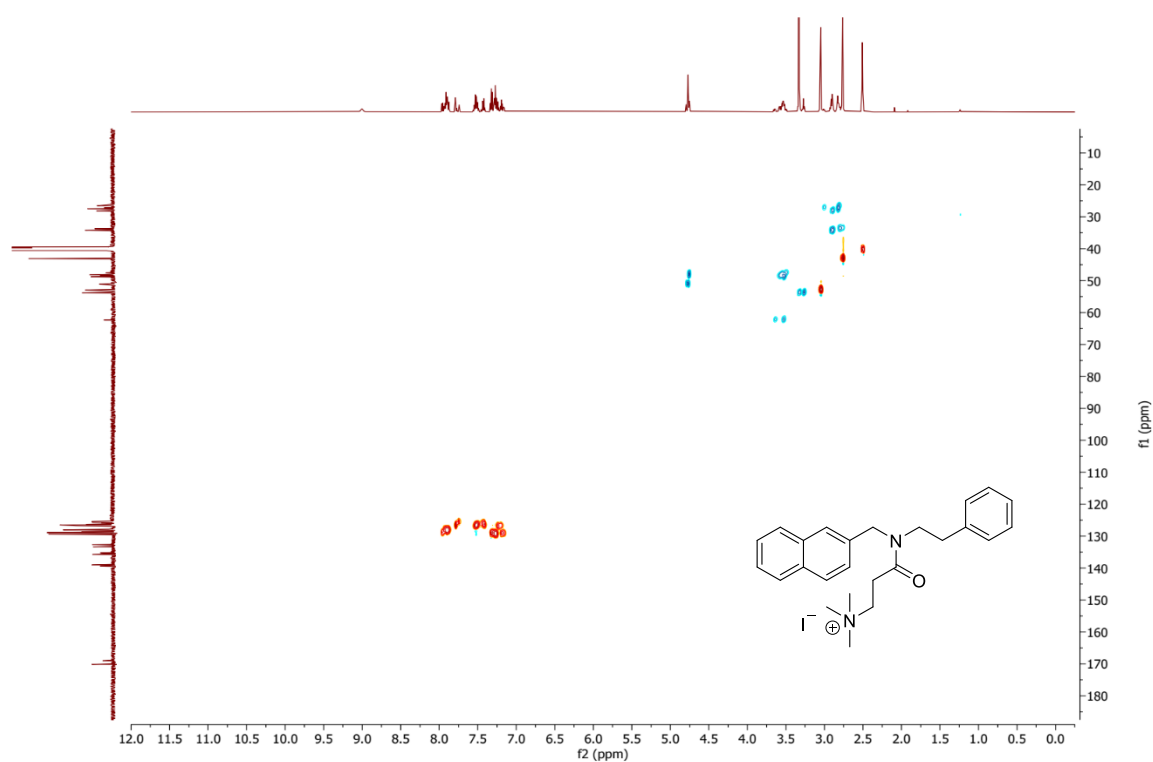

173. Compound **16d** -<sup>1</sup>H NMR

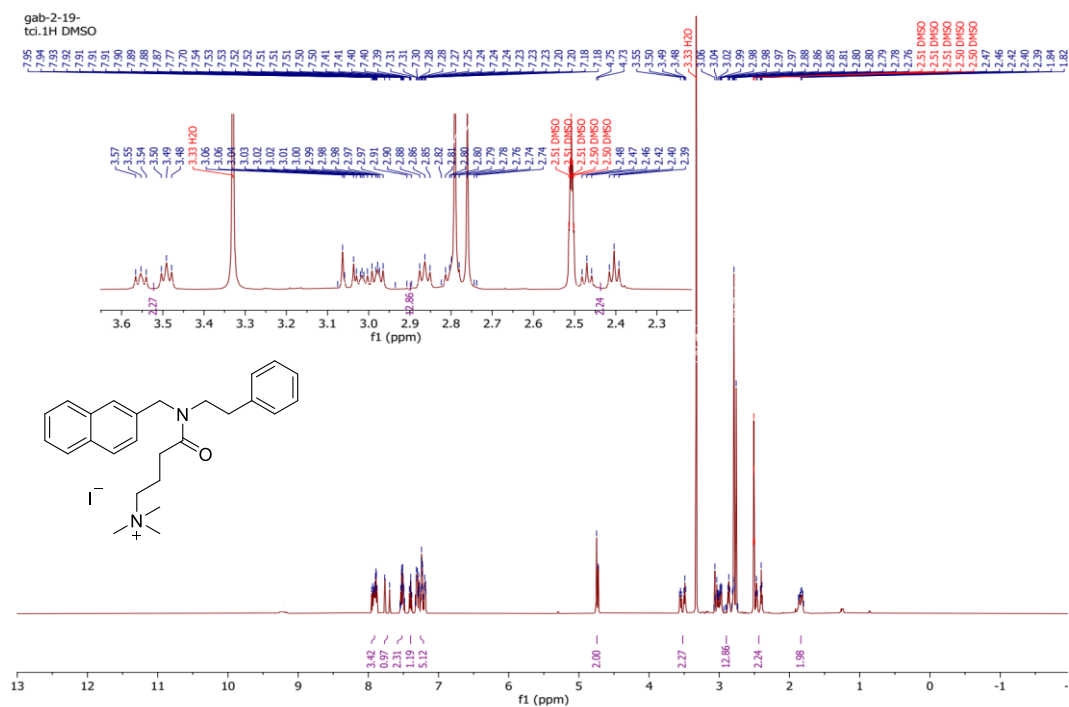

174. Compound **16d** -<sup>13</sup>C NMR

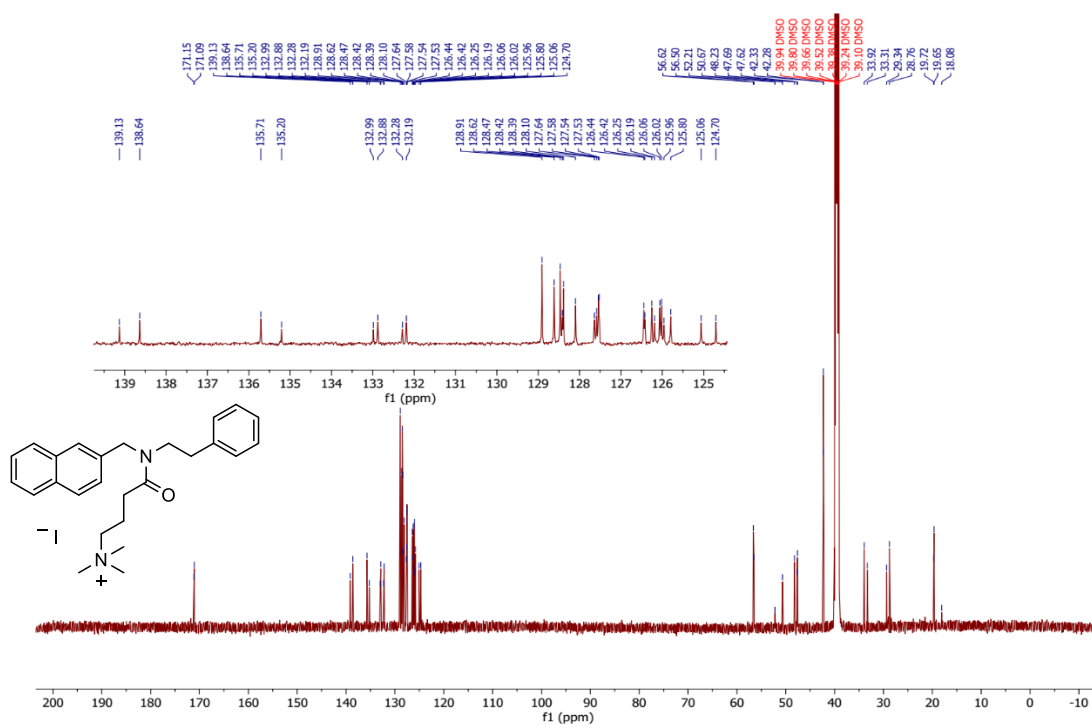

175. Compound **16d** -<sup>13</sup>CNMR-dept 135

211104-gab.18.fid  
Supervisor naresh  
gab-2-19-correct  
tcl.13C.DEPT135 DMSO F:\ gab 28

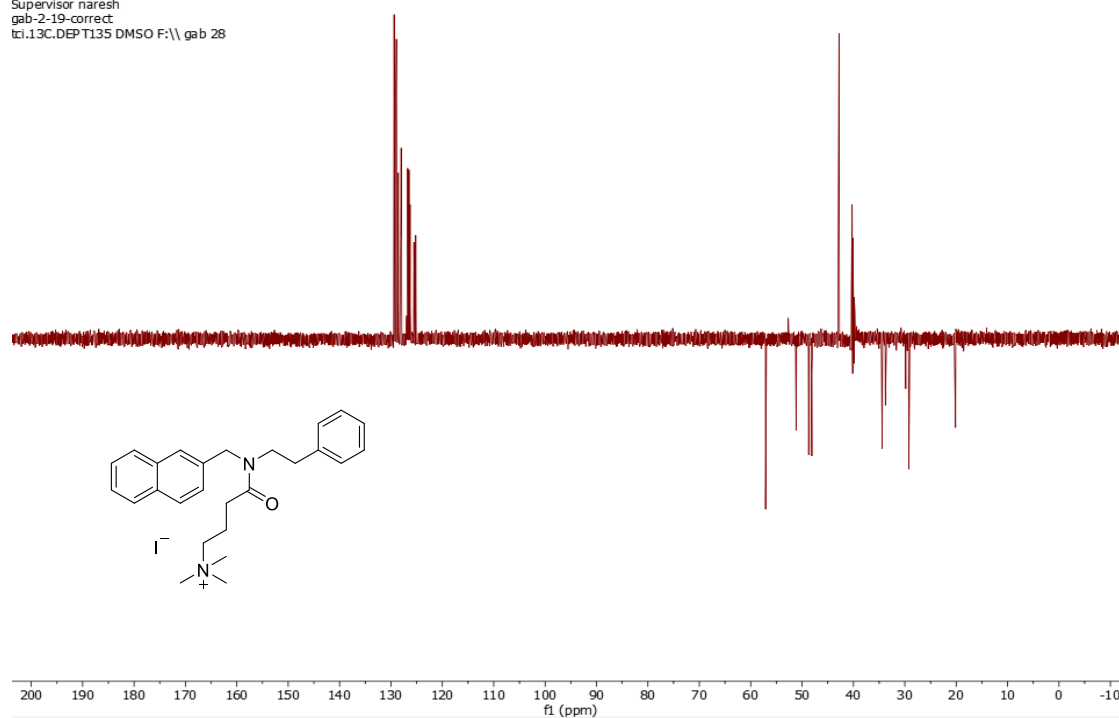

176. Compound **16d** -HSQC

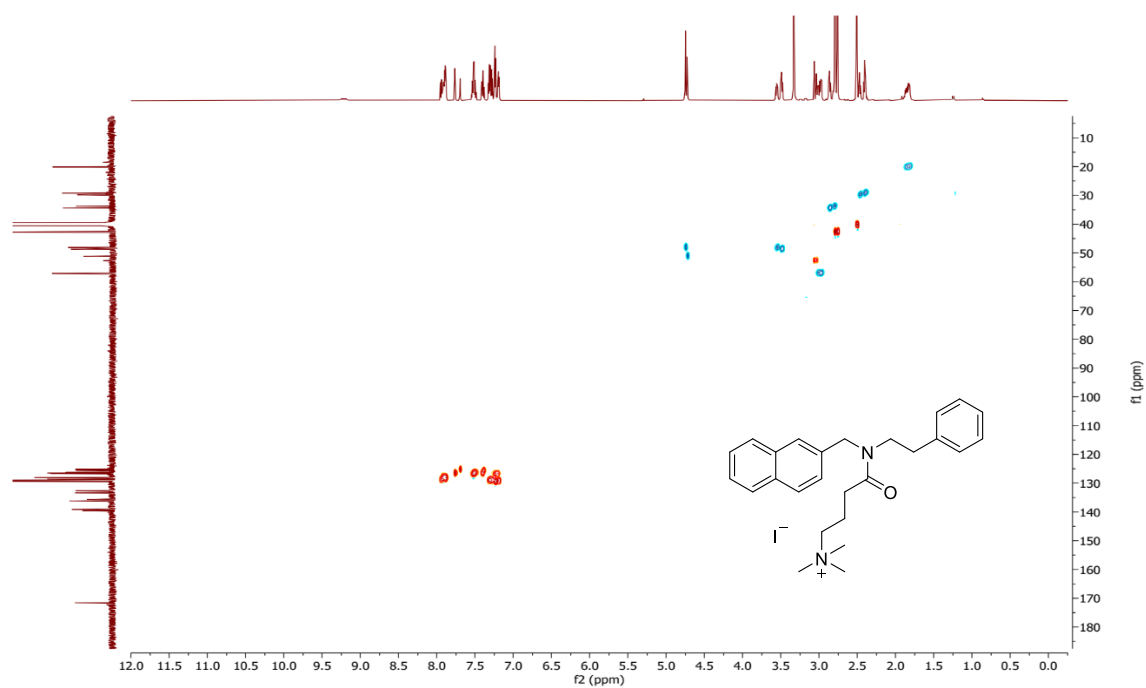

**15- Expanded  $^1\text{H}$ NMR spectra for some regions not clear in the full  $^1\text{H}$ NMR spectra:**

**12c**

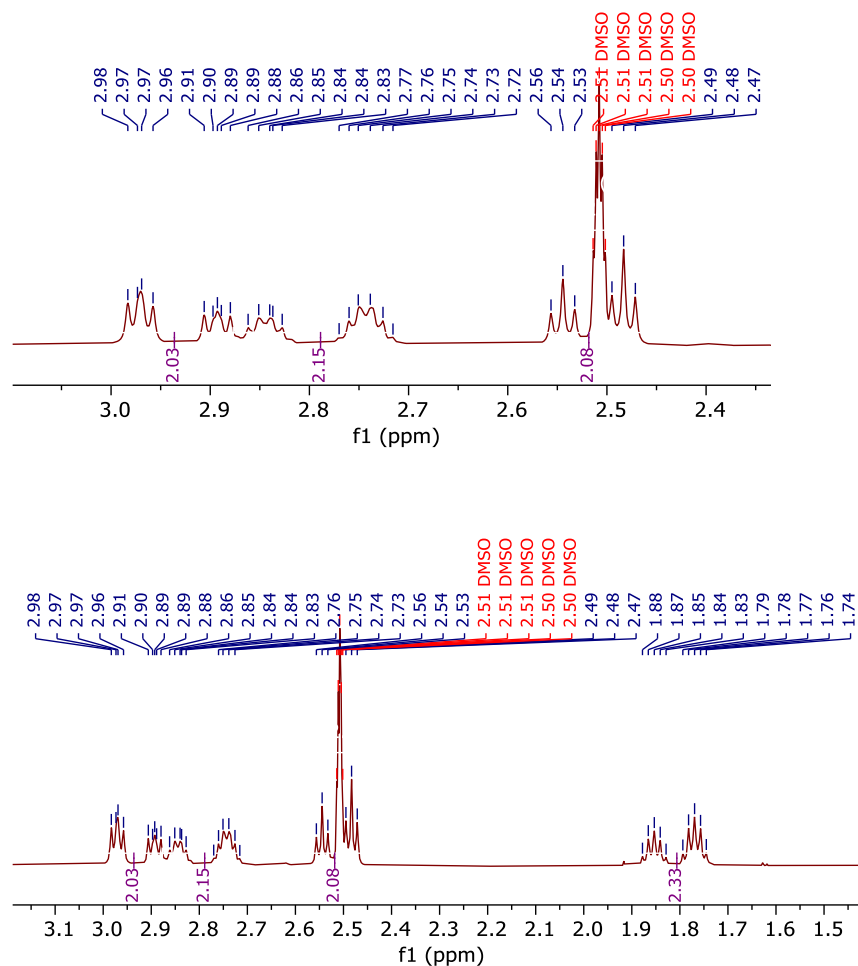

**12f**

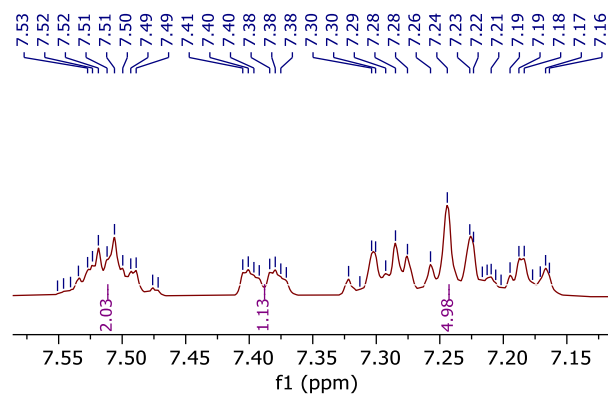



15 a

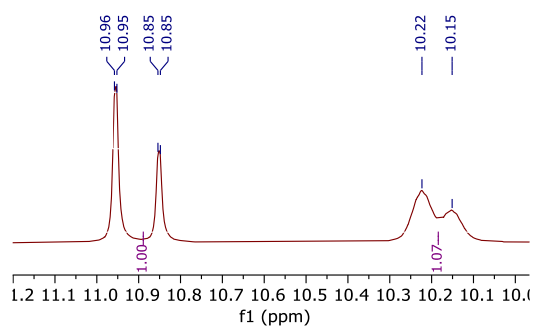

15b

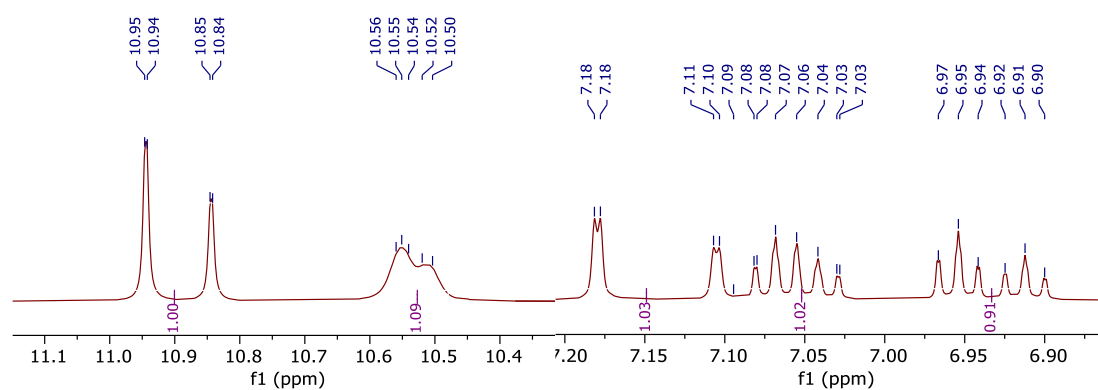

15c

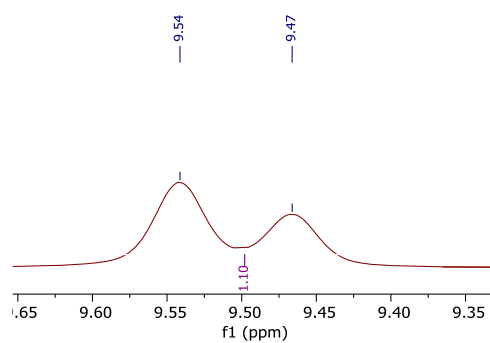

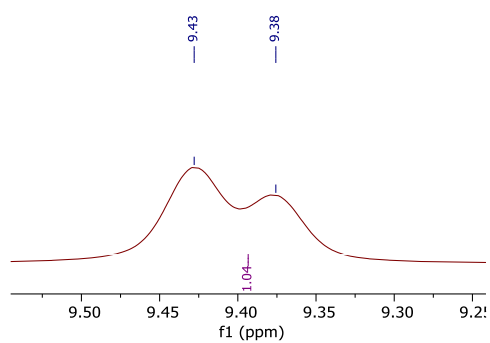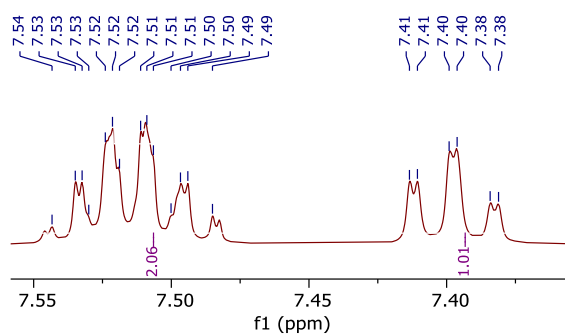

**16 a**

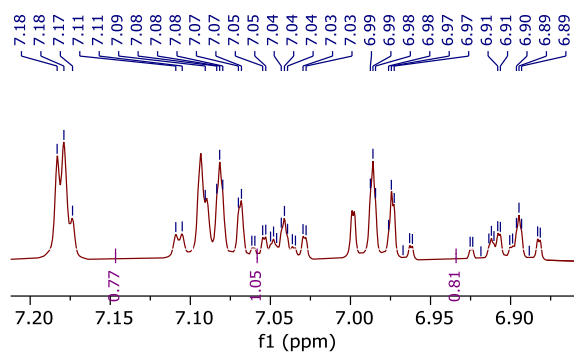

**16b**

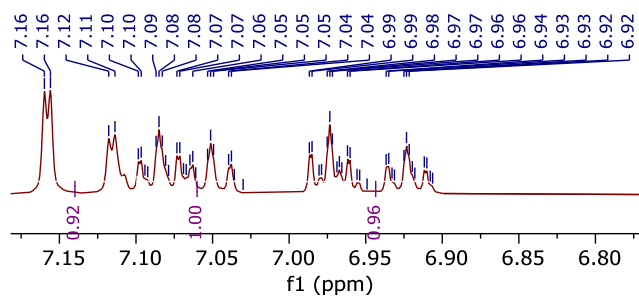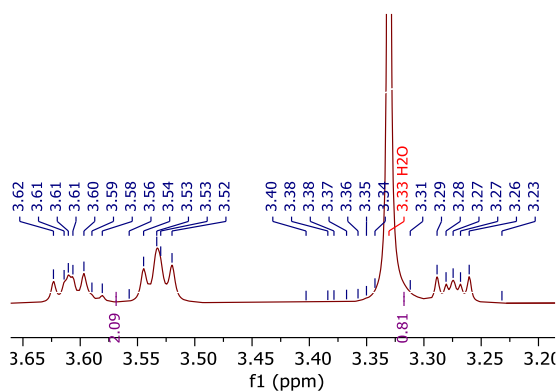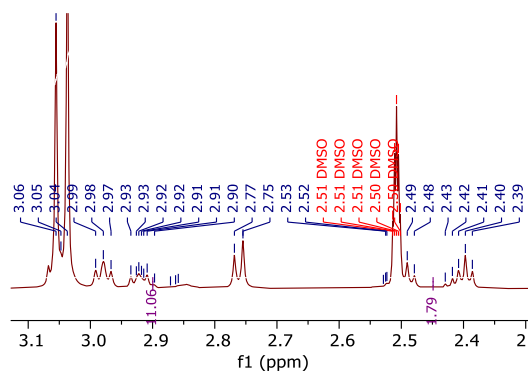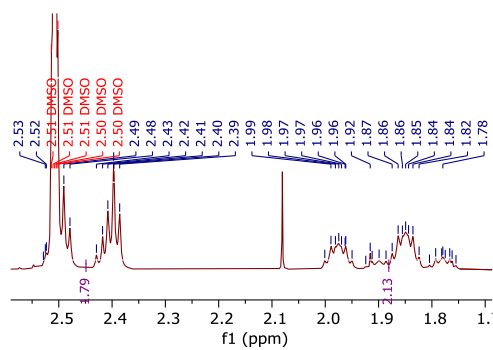

16d

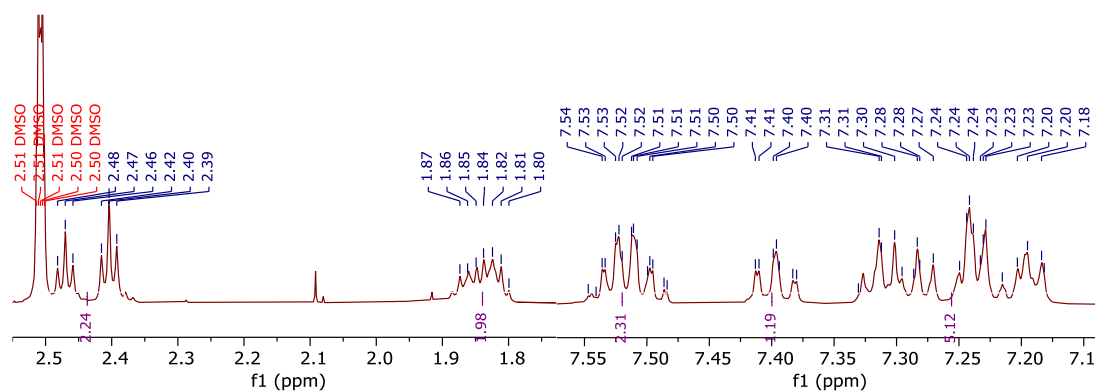

18a

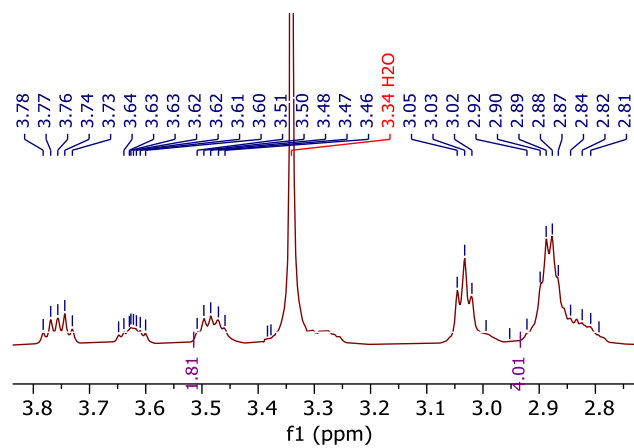

18b

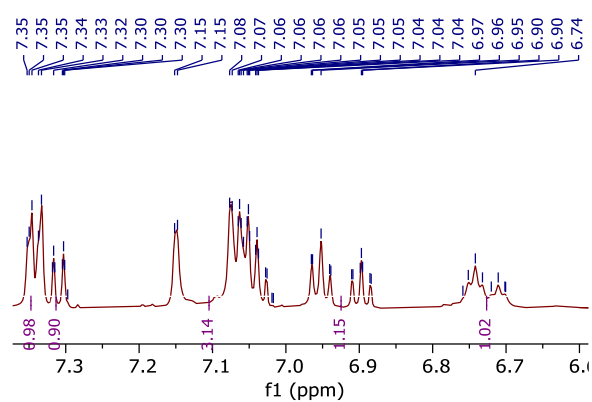

19a

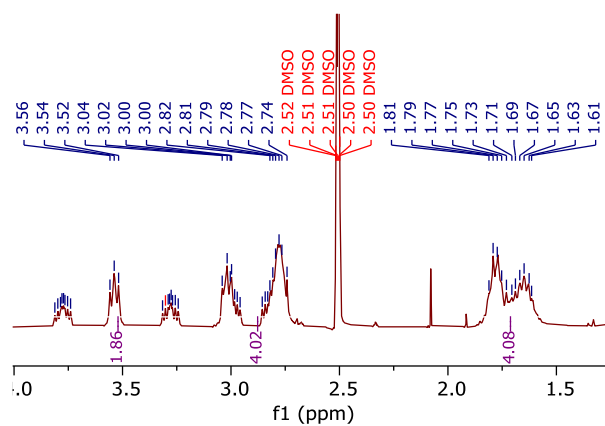

19b

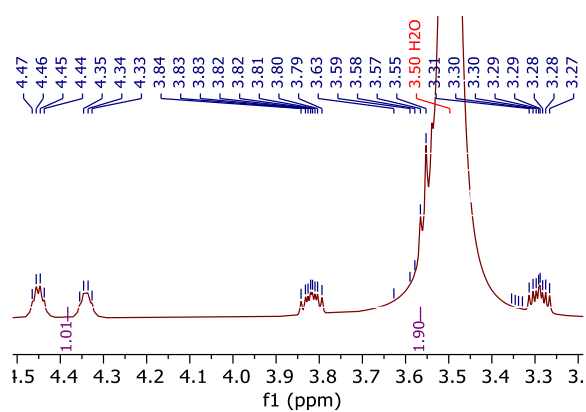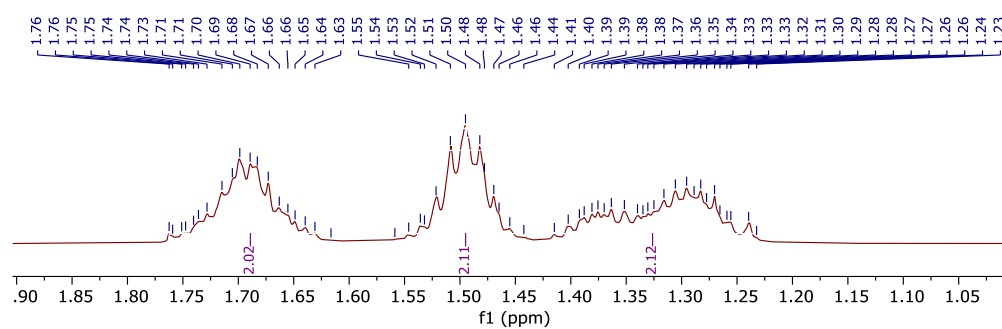

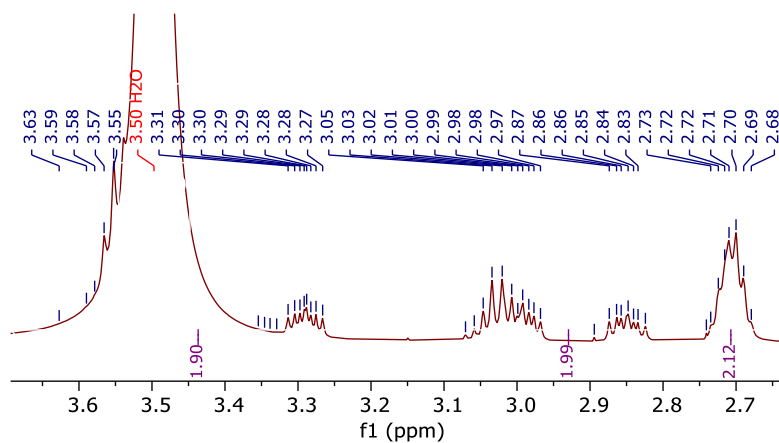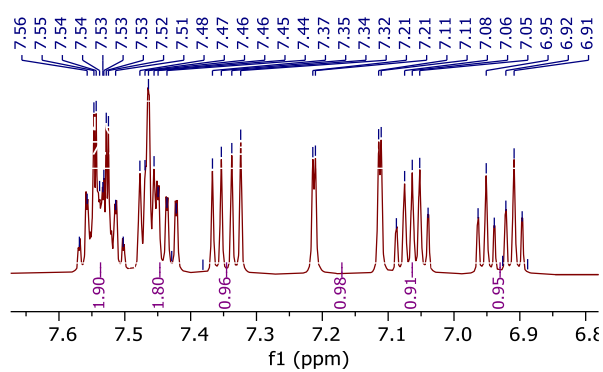

**20a**

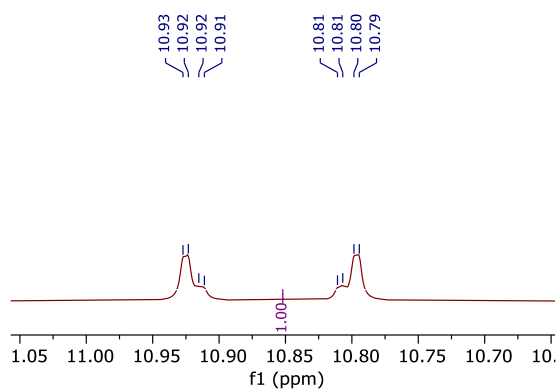

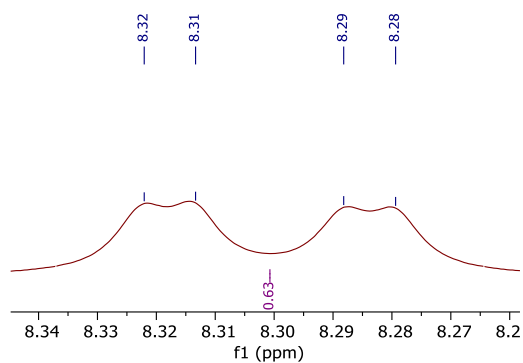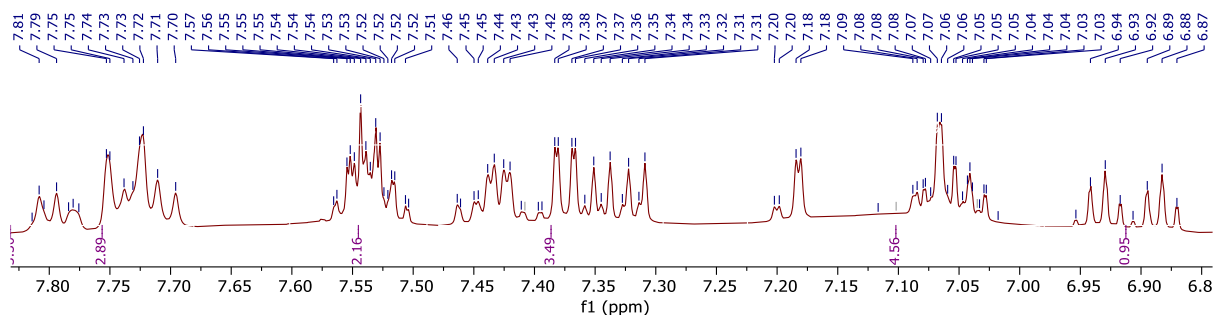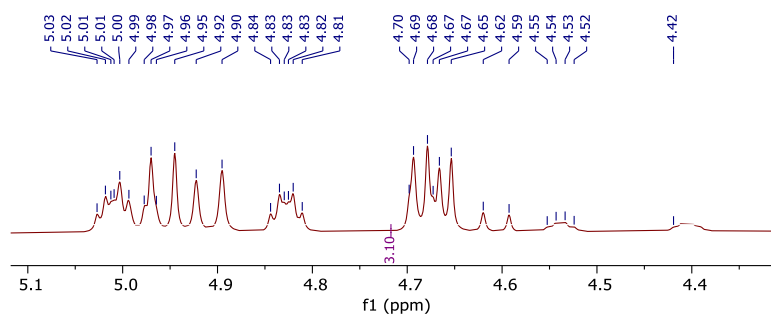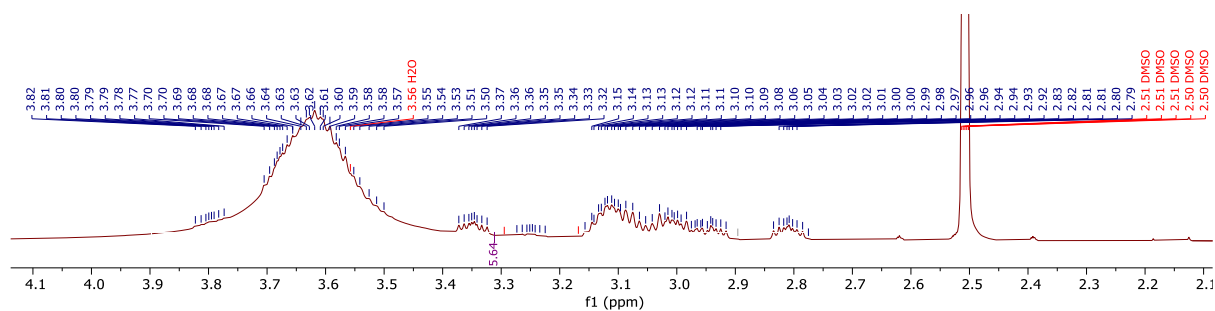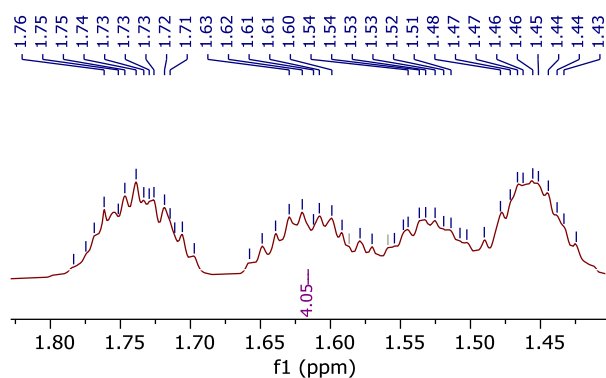

20b

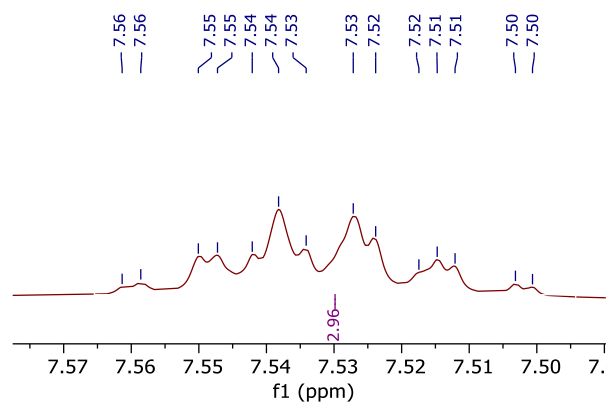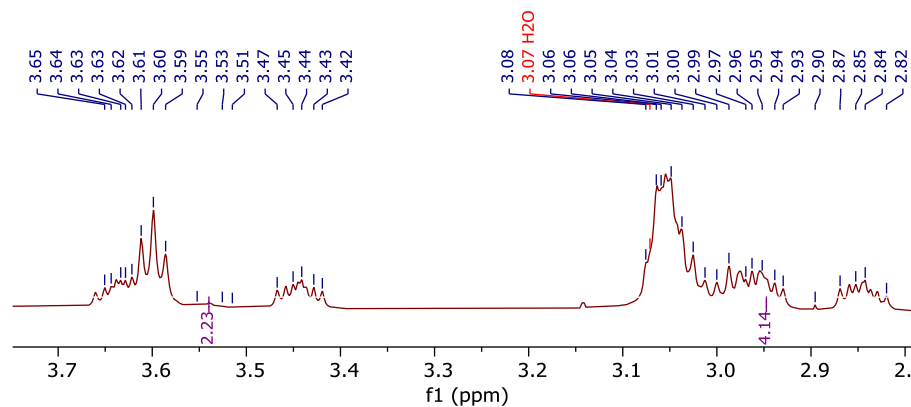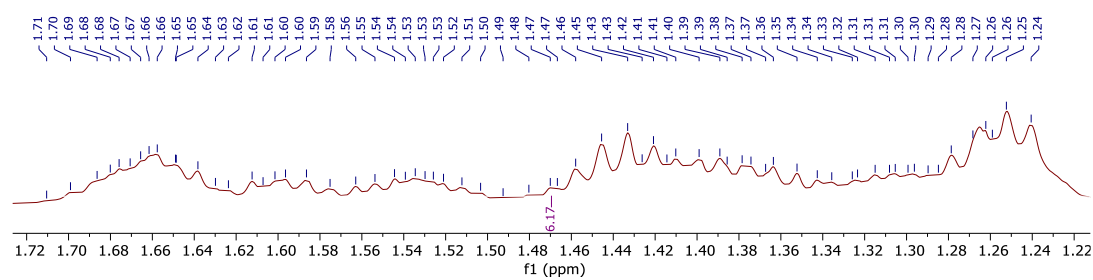



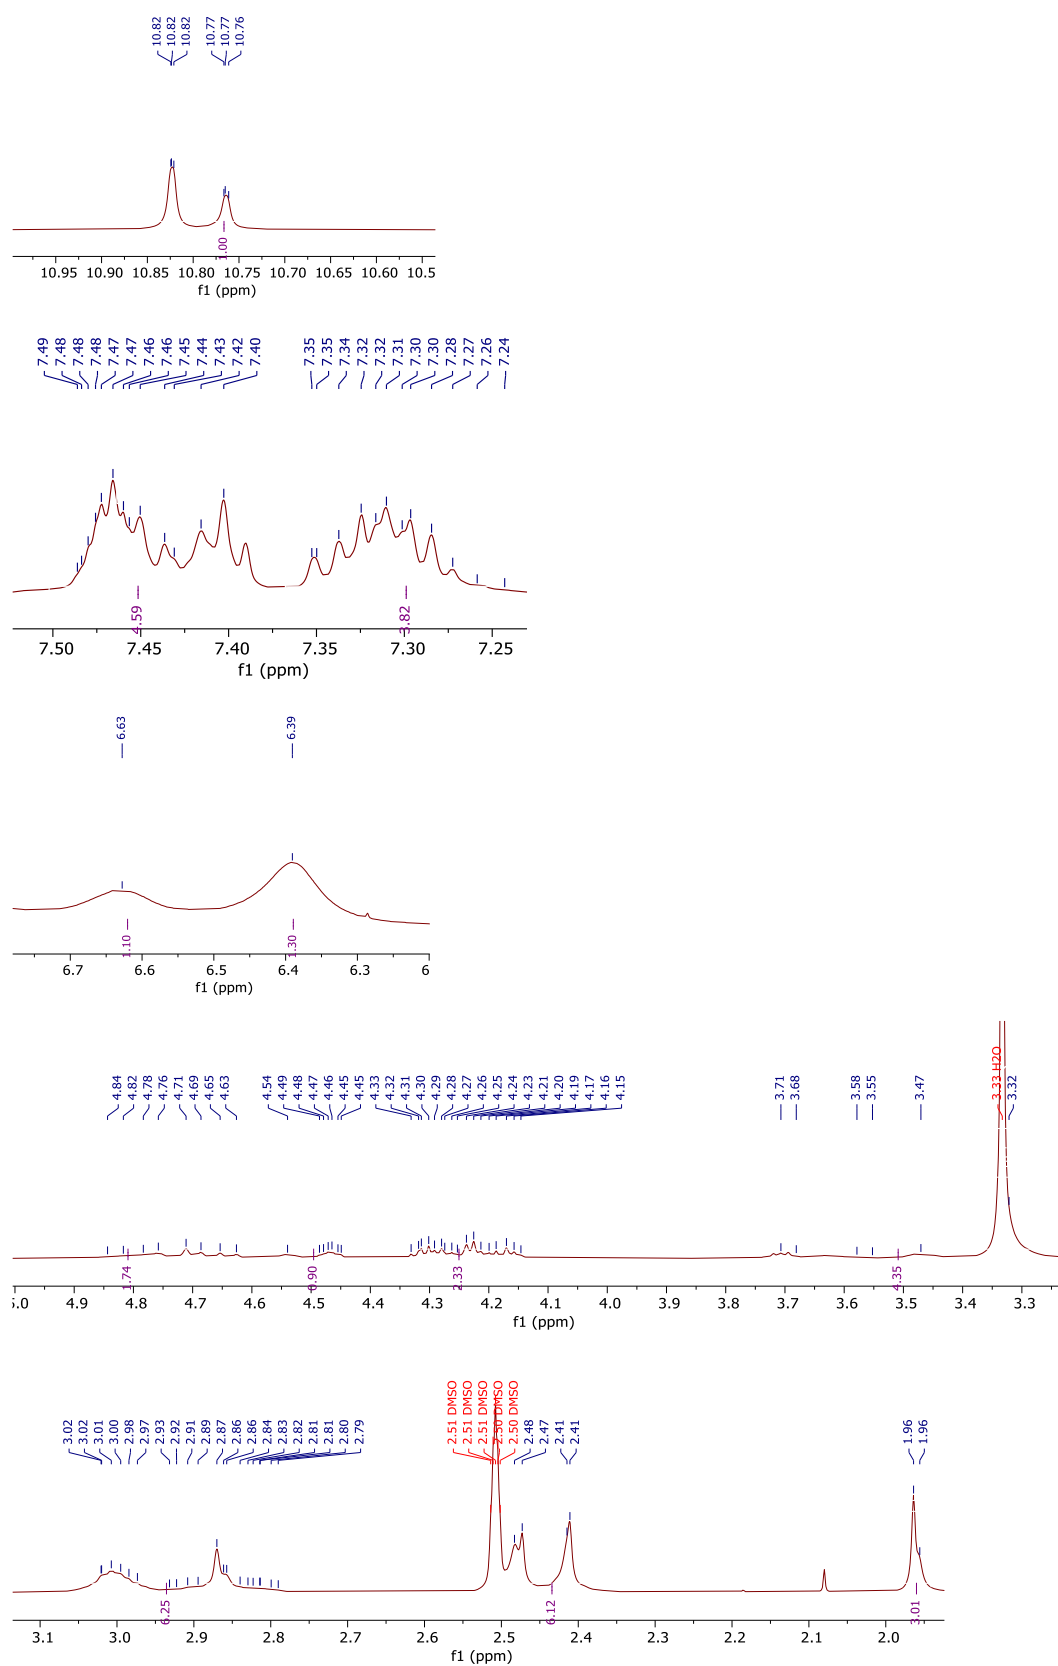

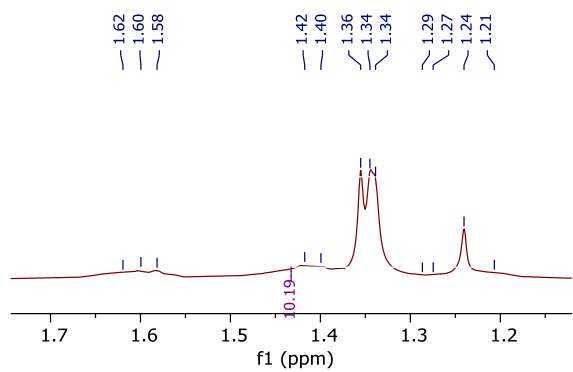

22

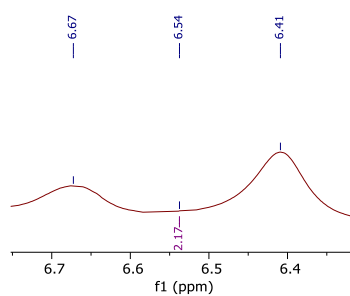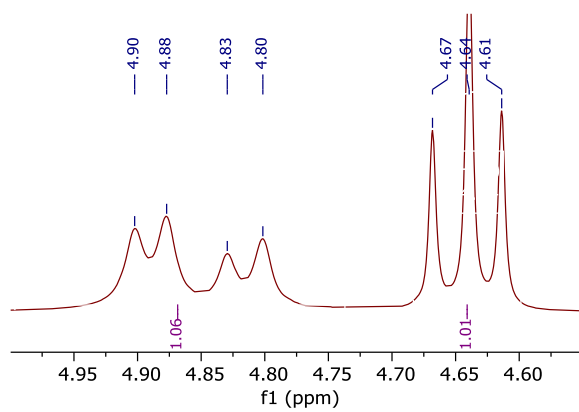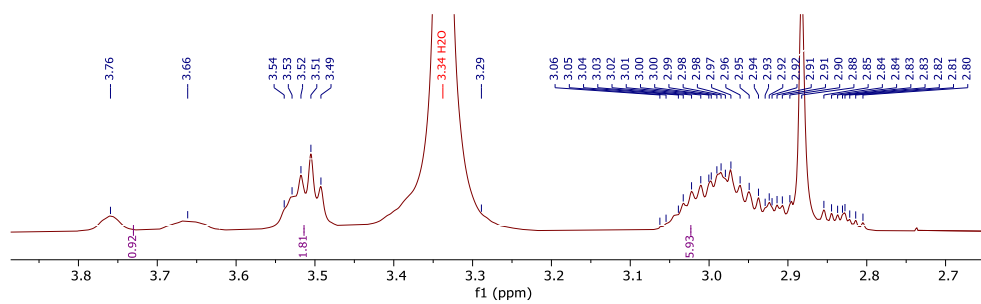

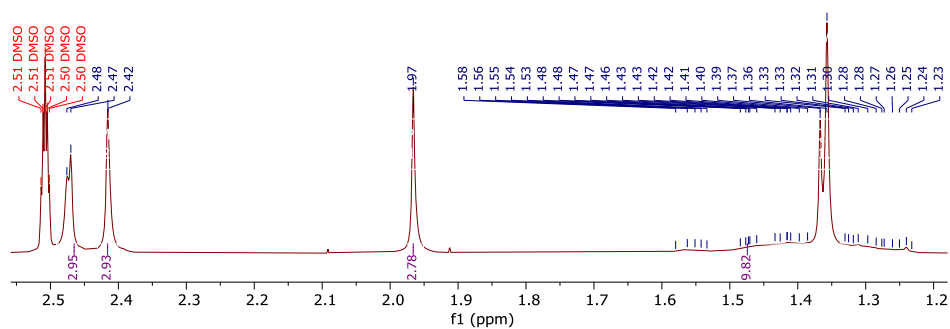

23

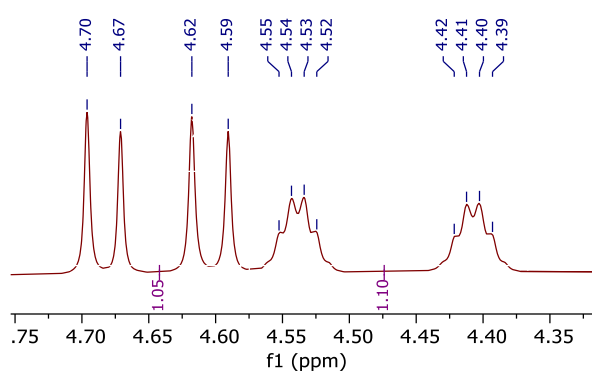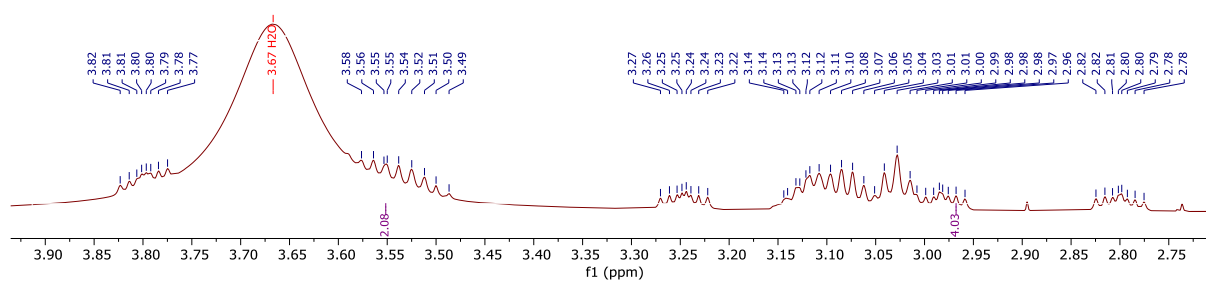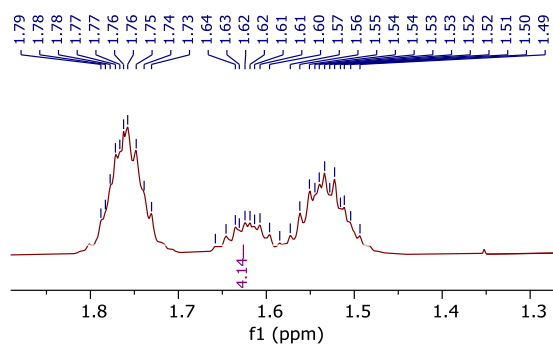

# The Supplementary Data for

## Short tryptamine based peptoids as potential therapeutics for microbial keratitis: Structure-function correlation studies

Ghayah Bahatheg <sup>1,3</sup>, Rajesh Kuppusamy <sup>1,2,\*</sup>, Muhammad Yasir <sup>2</sup>, David StC Black <sup>1</sup>, Mark Willcox <sup>2</sup> and Naresh Kumar <sup>1,\*</sup>

<sup>1</sup> School of Chemistry, The University of New South Wales, UNSW Sydney, NSW 2052, Australia; [g.bahatheg@unsw.edu.au](mailto:g.bahatheg@unsw.edu.au) (G.B); [d.black@unsw.edu.au](mailto:d.black@unsw.edu.au) (D.S.B)

<sup>2</sup> School of Optometry and Vision Science, The University of New South Wales, UNSW Sydney, NSW 2052, Australia; [m.yasir@unsw.edu.au](mailto:m.yasir@unsw.edu.au) (M.Y); [m.willcox@unsw.edu.au](mailto:m.willcox@unsw.edu.au) (M.W).

<sup>3</sup> Department of Chemistry, Faculty of Science, University of Jeddah, Jeddah, 21589, Saudi Arabia.

\* Correspondence: [n.kumar@unsw.edu.au](mailto:n.kumar@unsw.edu.au) (N.K); [r.kuppusamy@unsw.edu.au](mailto:r.kuppusamy@unsw.edu.au) (R.K)

### contents

|                                                                                                                                      |      |
|--------------------------------------------------------------------------------------------------------------------------------------|------|
| HRMS of 2-(1 <i>H</i> -indol-3-yl)- <i>N</i> -(naphthalen-2-ylmethyl) ethan-1-amine (8) .....                                        | S114 |
| HRMS of <i>N</i> -(naphthalen-2-ylmethyl)-2-phenylethan-1-amine (9) .....                                                            | S115 |
| HRMS of Tert-butyl(2-((2-(1 <i>H</i> -indol-3-yl)ethyl)(naphthalen-2-ylmethyl)amino)-2-oxoethyl)carbamate (11a) ...                  | S116 |
| HRMS of Tert-butyl(3-((2-(1 <i>H</i> -indol-3-yl) ethyl) (naphthalen-2-ylmethyl) amino)-3 oxopropyl) carbamate (11b) .....           | S117 |
| HRMS of Tert-butyl(4-((2-(1 <i>H</i> -indol-3-yl) ethyl) (naphthalen-2-ylmethyl) amino)-4-oxobutyl) carbamate (11c)                  | S118 |
| HRMS of Tert-butyl (2-((naphthalen-2-ylmethyl) (phenethyl)amino)-2-oxoethyl) carbamate (11d).....                                    | S119 |
| HRMS of Tert-butyl (3-((naphthalen-2-ylmethyl) (phenethyl)amino)-3-oxopropyl) carbamate (11e). ....                                  | S120 |
| HRMS of Tert-butyl (4-((naphthalen-2-ylmethyl) (phenethyl)amino)-4-oxobutyl) carbamate (11f) .....                                   | S121 |
| HRMS of <i>N</i> -(2-(1 <i>H</i> -indol-3-yl) ethyl)-2-amino- <i>N</i> -(naphthalen-2-ylmethyl) acetamide (TFA salt) (12a).....      | S122 |
| HRMS of <i>N</i> -(2-(1 <i>H</i> -indol-3-yl) ethyl)-3-amino- <i>N</i> -(naphthalen-2-ylmethyl) propanamide (TFA salt) (12b) .....   | S123 |
| HRMS of <i>N</i> -(2-(1 <i>H</i> -indol-3-yl) ethyl)-4-amino- <i>N</i> -(naphthalen-2-ylmethyl) butanamide (TFA salt) (12c) .....    | S123 |
| HRMS of 2-Amino- <i>N</i> -(naphthalen-2-ylmethyl)- <i>N</i> -phenethylacetamide (TFA salt) (12d).....                               | S125 |
| HRMS of 3-Amino- <i>N</i> -(naphthalen-2-ylmethyl)- <i>N</i> -phenethylpropanamide (TFA salt) (12e).....                             | S125 |
| HRMS of 4-Amino- <i>N</i> -(naphthalen-2-ylmethyl)- <i>N</i> -phenethyl- butanamide (TFA salt) (12f) .....                           | S126 |
| HRMS of <i>N</i> -(2-(1 <i>H</i> -indol-3-yl) ethyl)-2-guanidino- <i>N</i> -(naphthalen-2-ylmethyl) acetamide.....                   | 128  |
| (TFA salt)(13a).....                                                                                                                 | S128 |
| HRMS of <i>N</i> -(2-(1 <i>H</i> -indol-3-yl) ethyl)-3-guanidino- <i>N</i> -(naphthalen-2-ylmethyl) propanamide (TFA salt) (13b)..   | S128 |
| HRMS of <i>N</i> -(2-(1 <i>H</i> -indol-3-yl) ethyl)-4-guanidino- <i>N</i> -(naphthalen-2-ylmethyl) butanamide (TFA salt) (13c) .... | S129 |
| HRMS of 2-Guanidino- <i>N</i> -(naphthalen-2-ylmethyl)- <i>N</i> -phenethyl acetamide (TFA salt) (13d) .....                         | S131 |
| HRMS of 3-Guanidino- <i>N</i> -(naphthalen-2-ylmethyl)- <i>N</i> -phenethyl- propanamide (TFA salt) (13e) .....                      | S132 |
| HRMS of 4-Guanidino- <i>N</i> -(naphthalen-2-ylmethyl)- <i>N</i> -phenethyl- butanamide (TFA salt) (13f) .....                       | S133 |

|                                                                                                                                                                                                                  |      |
|------------------------------------------------------------------------------------------------------------------------------------------------------------------------------------------------------------------|------|
| HRMS of <i>N</i> -(2-(1 <i>H</i> -indol-3-yl) ethyl)-3-(dimethylamino)- <i>N</i> -(naphthalen-2-ylmethyl) propenamide (14a).....                                                                                 | S134 |
| HRMS of <i>N</i> -(2-(1 <i>H</i> -indol-3-yl) ethyl)-4-(dimethylamino)- <i>N</i> -(naphthalen-2-ylmethyl) butanamide (14b).....                                                                                  | S135 |
| HRMS of 4-(Dimethylamino)- <i>N</i> -(naphthalen-2-ylmethyl)- <i>N</i> -phenethyl-butanamide (14c) .....                                                                                                         | S136 |
| HRMS of 3-(Dimethylamino)- <i>N</i> -(naphthalen-2-ylmethyl)- <i>N</i> -phenethyl-propanamide (14d) .....                                                                                                        | S137 |
| HRMS of <i>N</i> -(2-(1 <i>H</i> -indol-3-yl) ethyl)-3-(dimethylamino)- <i>N</i> -(naphthalen-2-ylmethyl) propenamide (15a).....                                                                                 | S138 |
| HRMS of <i>N</i> -(2-(1 <i>H</i> -indol-3-yl) ethyl)-4-(dimethylamino)- <i>N</i> -(naphthalen-2-ylmethyl) butanamide (15b).....                                                                                  | S139 |
| HRMS of 3-(Dimethylamino)- <i>N</i> -(naphthalen-2-ylmethyl)- <i>N</i> -phenethyl-propanamide (15c).....                                                                                                         | S140 |
| HRMS of 4-(Dimethylamino)- <i>N</i> -(naphthalen-2-ylmethyl)- <i>N</i> -phenethyl-butanamide (15d).....                                                                                                          | S141 |
| HRMS of 3-((2-(1 <i>H</i> -indol-3-yl) ethyl) (naphthalen-2-ylmethyl) amino)- <i>N,N,N</i> -trimethyl-3-oxopropan-1-aminium (16a) .....                                                                          | S142 |
| HRMS of 4-((2-(1 <i>H</i> -indol-3-yl) ethyl) (naphthalen-2-ylmethyl) amino)- <i>N,N,N</i> -trimethyl-4-oxobutan-1-aminium (16b) .....                                                                           | S143 |
| HRMS of <i>N,N,N</i> -Trimethyl-3-((naphthalen-2-ylmethyl)(phenethyl) amino)-3-oxopropan-1-aminium (16c).....                                                                                                    | S144 |
| HRMS of <i>N,N,N</i> -Trimethyl-4-((naphthalen-2-ylmethyl)(phenethyl) amino)-4-oxobutan-1-aminium (16d).....                                                                                                     | S145 |
| HRMS of Di-tert-butyl(5-((2-(1 <i>H</i> -indol-3-yl) ethyl) (naphthalen-2-ylmethyl) amino)-5-oxopentane-1,4-diyl) (S)-dicarbamate (18a) .....                                                                    | S146 |
| HRMS of Di-tert-butyl(6-((2-(1 <i>H</i> -indol-3-yl) ethyl) (naphthalen-2-ylmethyl) amino)-6-oxohexane-1,5-diyl) (S)-dicarbamate (18b).....                                                                      | S147 |
| HRMS of (S)- <i>N</i> -(2-(1 <i>H</i> -indol-3-yl) ethyl)-2,5-diamino- <i>N</i> -(naphthalen-2-ylmethyl) pentanamide (TFA salt) (19a) .....                                                                      | S148 |
| HRMS of (S)- <i>N</i> -(2-(1 <i>H</i> -indol-3-yl) ethyl)-2,6-diamino- <i>N</i> -(naphthalen-2-ylmethyl) hexanamide (TFA salt) (19b) .....                                                                       | S149 |
| HRMS of <i>N</i> -(2-(1 <i>H</i> -indol-3-yl) ethyl)-2,5-diguanidino- <i>N</i> -(naphthalen-2-ylmethyl) pentanamide (TFA salt) (20a) .....                                                                       | S150 |
| HRMS of (S)- <i>N</i> -(2-(1 <i>H</i> -indol-3-yl) ethyl)-2,6-diguanidino- <i>N</i> -(naphthalen-2-ylmethyl) hexanamide (TFA salt) (20b) .....                                                                   | S151 |
| HRMS of Tert-butyl(S)-(1-((2-(1 <i>H</i> -indol-3-yl) ethyl) (naphthalen-2-ylmethyl) amino)-1-oxo-5-(3-((2,2,4,6,7-pentamethyl-2,3-dihydrobenzofuran-5-yl) sulfonyl)guanidino) pentan-2-yl) carbamate (21) ..... | S152 |
| HRMS of (S)- <i>N</i> -(2-(1 <i>H</i> -indol-3-yl) ethyl)-2-amino- <i>N</i> -(naphthalen-2-ylmethyl)-5-(3-((2,2,4,6,7-pentamethyl-2,3-dihydrobenzofuran-5-yl) sulfonyl) guanidino)pentanamide (22) .....         | S153 |
| HRMS of (S)- <i>N</i> -(2-(1 <i>H</i> -indol-3-yl) ethyl)-2-amino-5-guanidino- <i>N</i> -(naphthalen-2-ylmethyl) pentanamide (TFA salt) (23) .....                                                               | S154 |
| HRMS of <i>N</i> -benzyl-2-(1 <i>H</i> -indol-3-yl) ethan-1-amine (24).....                                                                                                                                      | S155 |
| HRMS of Tert-butyl(2-((2-(1 <i>H</i> -indol-3-yl)ethyl)(benzyl)amino)-2-oxoethyl)carbamate (25) .....                                                                                                            | S156 |
| HRMS of <i>N</i> -(2-(1 <i>H</i> -indol-3-yl) ethyl)-2-amino- <i>N</i> -benzylacetamide (26) (TFA salt) .....                                                                                                    | S157 |

HRMS of 2-(1H-indol-3-yl)-N-(naphthalen-2-ylmethyl) ethan-1-amine (8)

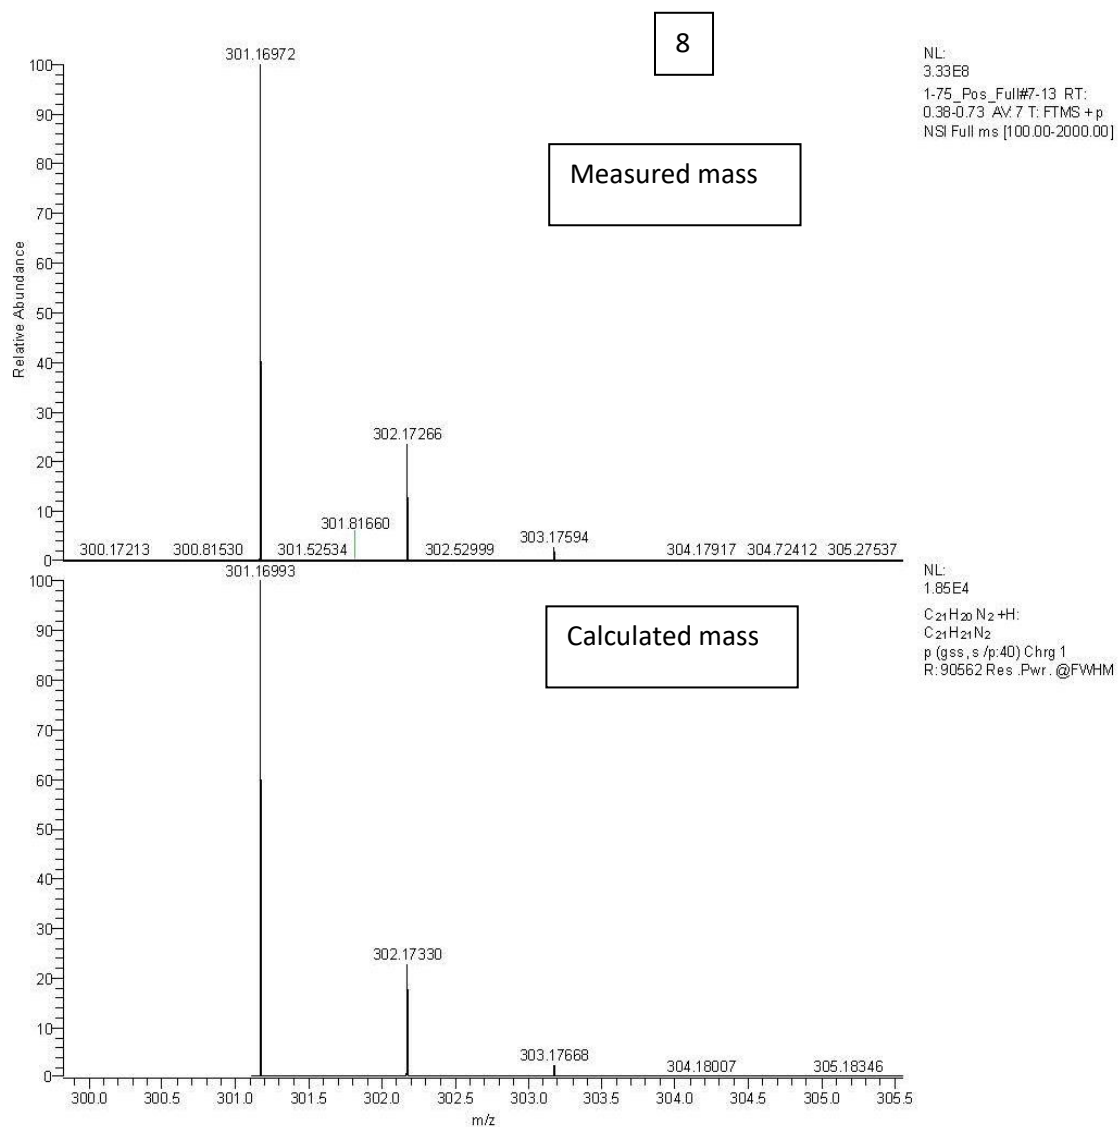

HRMS of N-(naphthalen-2-ylmethyl)-2-phenylethan-1-amine (9)

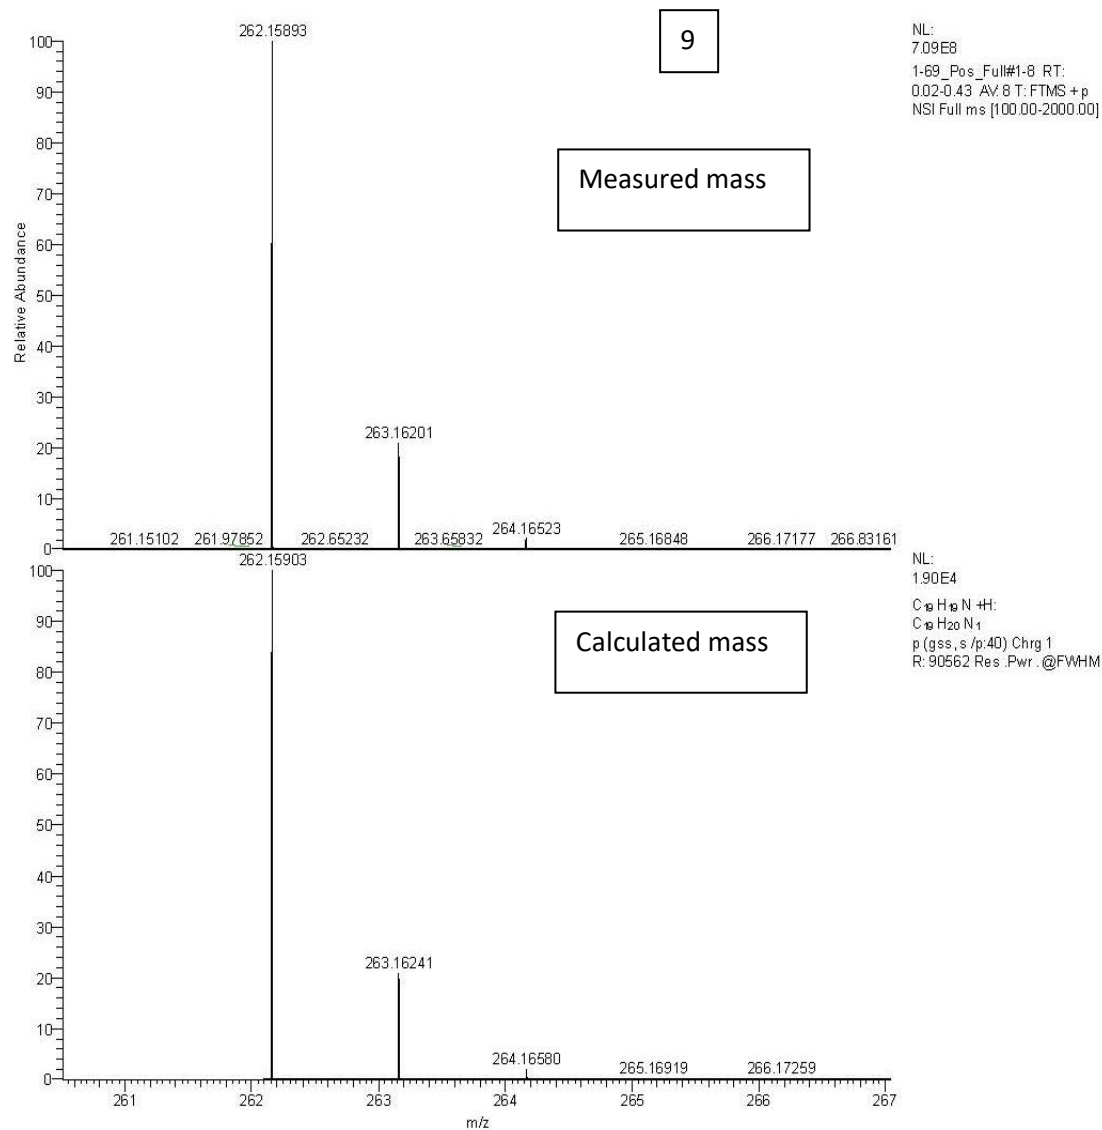

HRMS of *Tert-butyl(2-((2-(1H-indol-3-yl)ethyl)(naphthalen-2-ylmethyl)amino)-2-oxoethyl)carbamate (11a)*

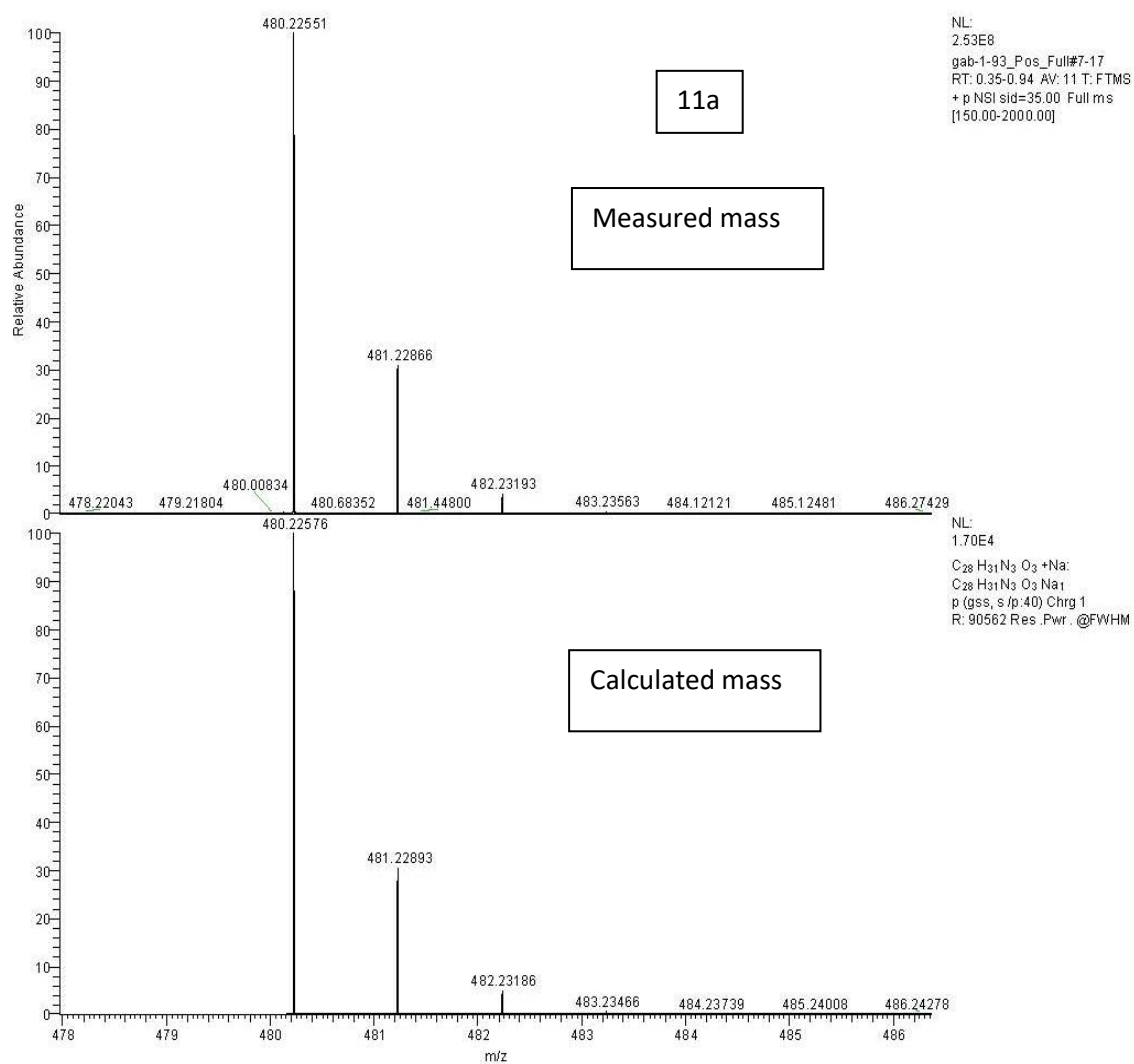



HRMS of *Tert-butyl(3-((2-(1H-indol-3-yl) ethyl) (naphthalen-2-ylmethyl) amino)-3 oxopropyl) carbamate (11b)*

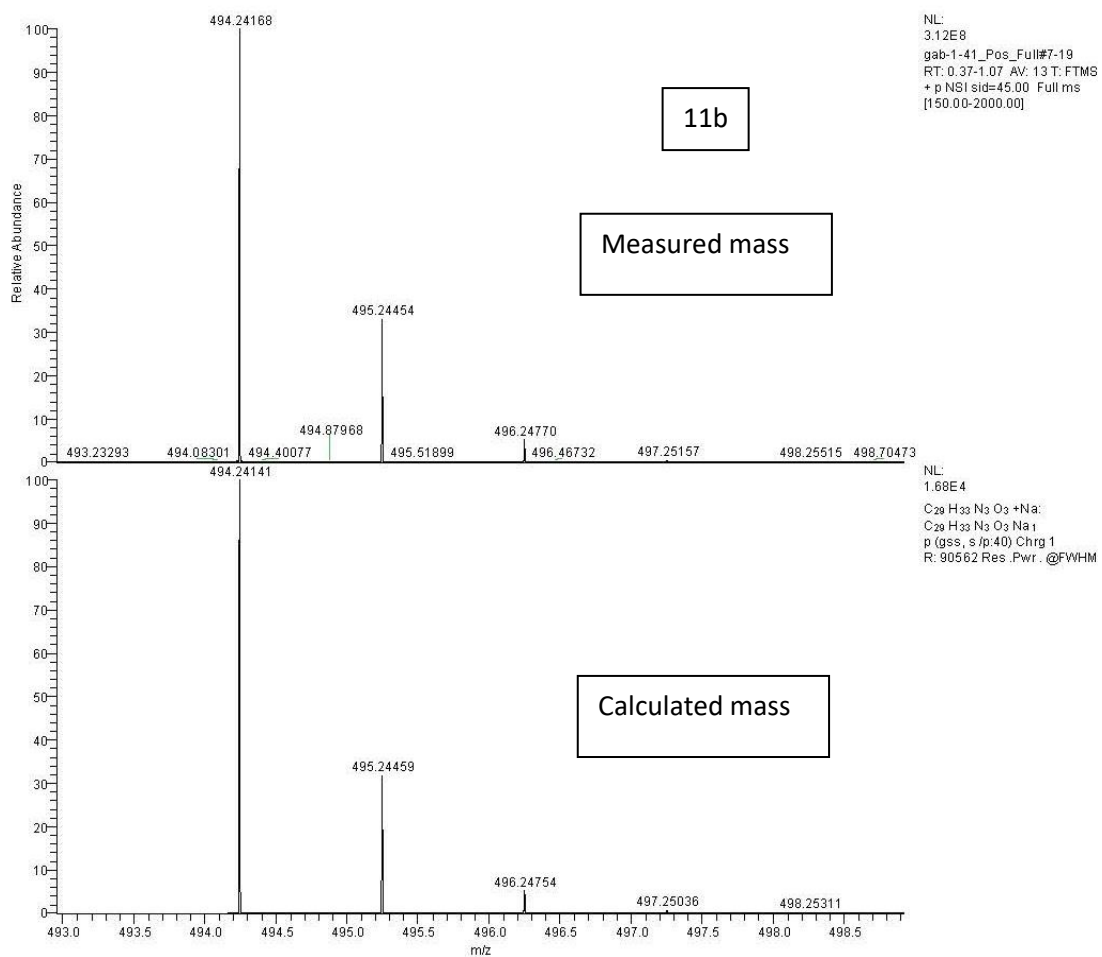

HRMS of *Tert-butyl(4-((2-(1H-indol-3-yl) ethyl) (naphthalen-2-ylmethyl) amino)-4-oxobutyl) carbamate (11c)*

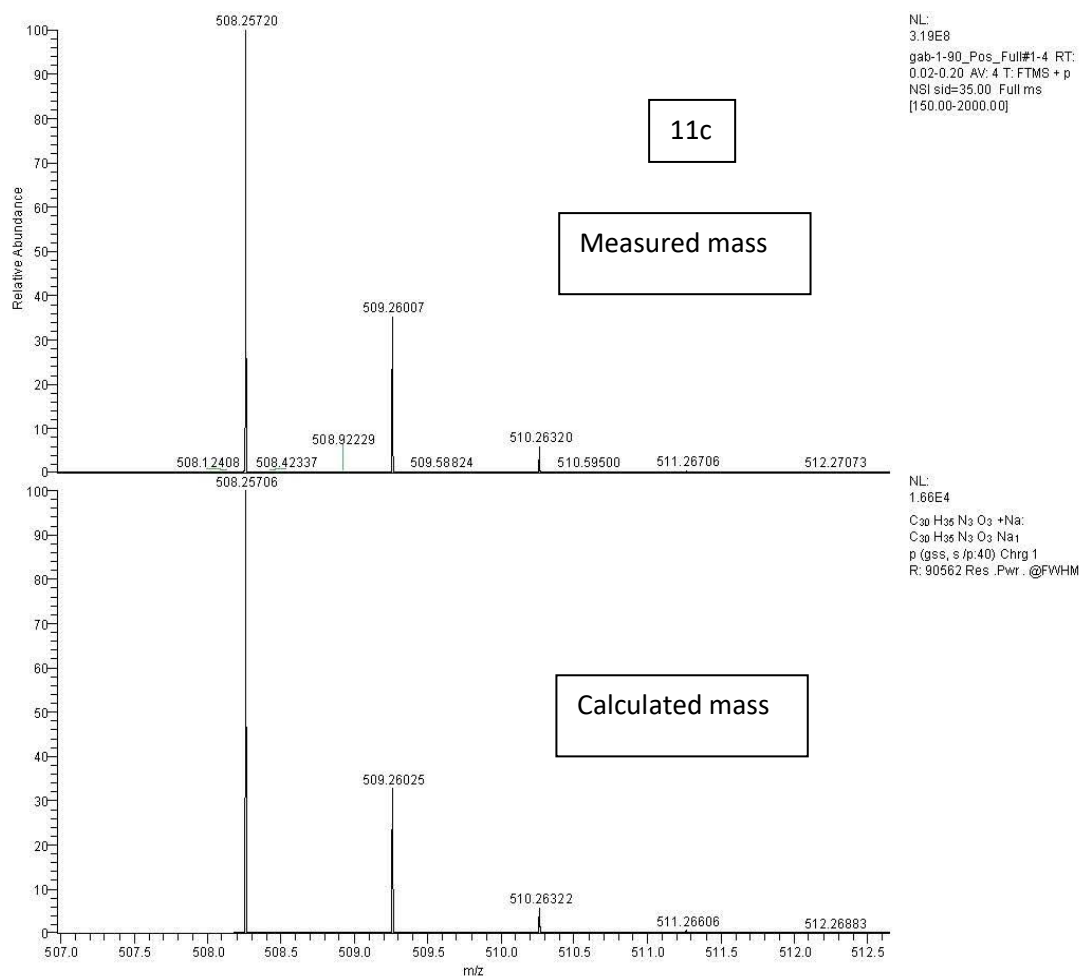

HRMS of *Tert-butyl (2-((naphthalen-2-ylmethyl) (phenethyl)amino)-2-oxoethyl) carbamate (11d)*

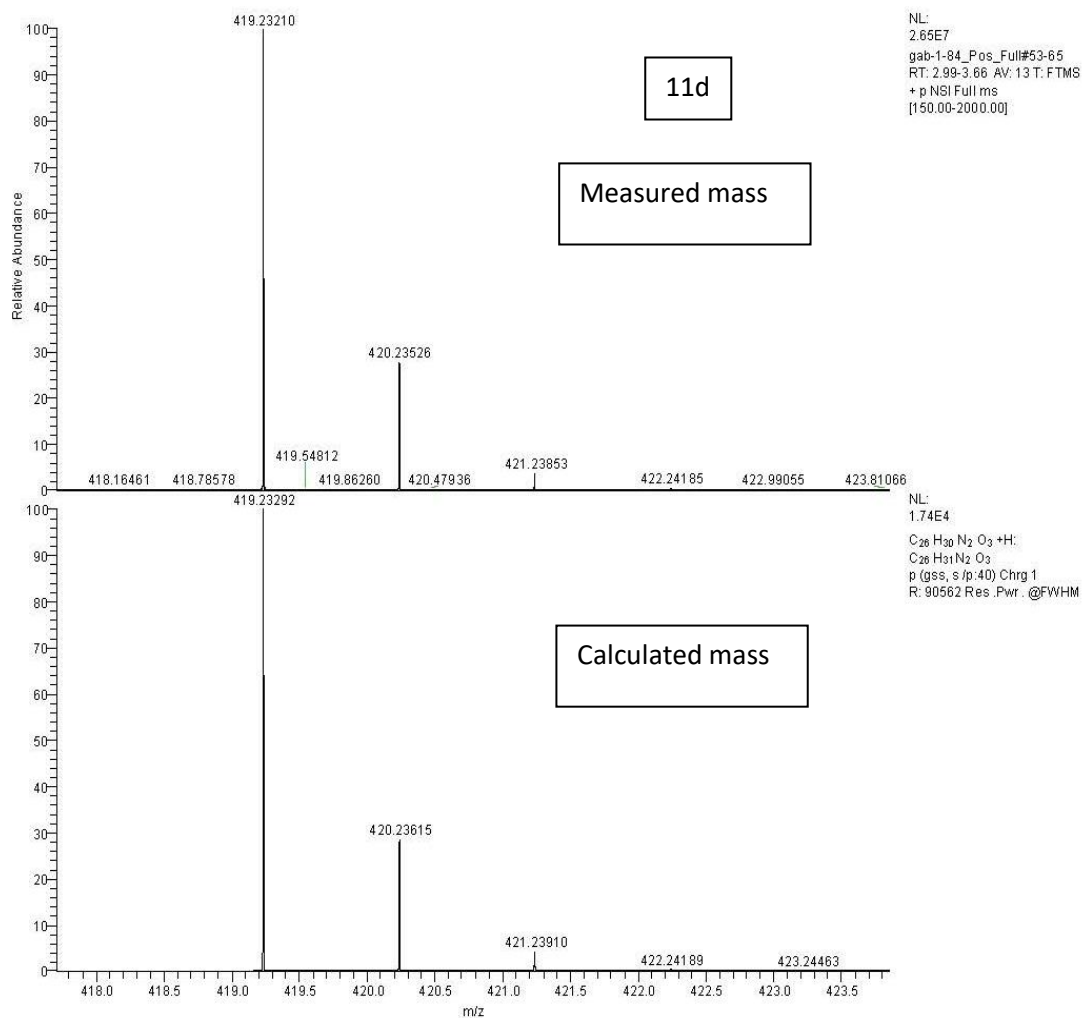

HRMS of *Tert-butyl (3-((naphthalen-2-ylmethyl) (phenethyl)amino)-3-oxopropyl) carbamate (11e)*

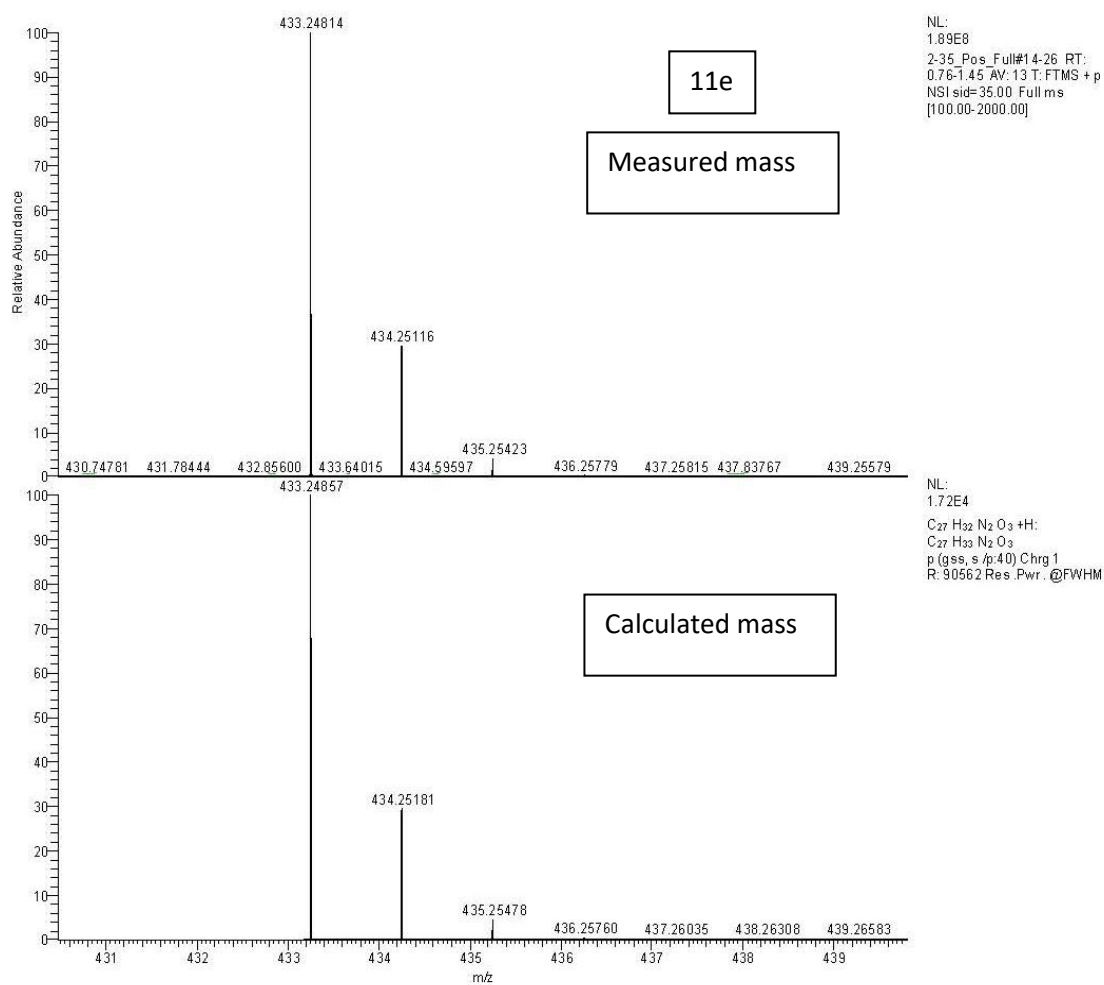

HRMS of *Tert-butyl (4-((naphthalen-2-ylmethyl) (phenethyl)amino)-4-oxobutyl) carbamate (11f)*

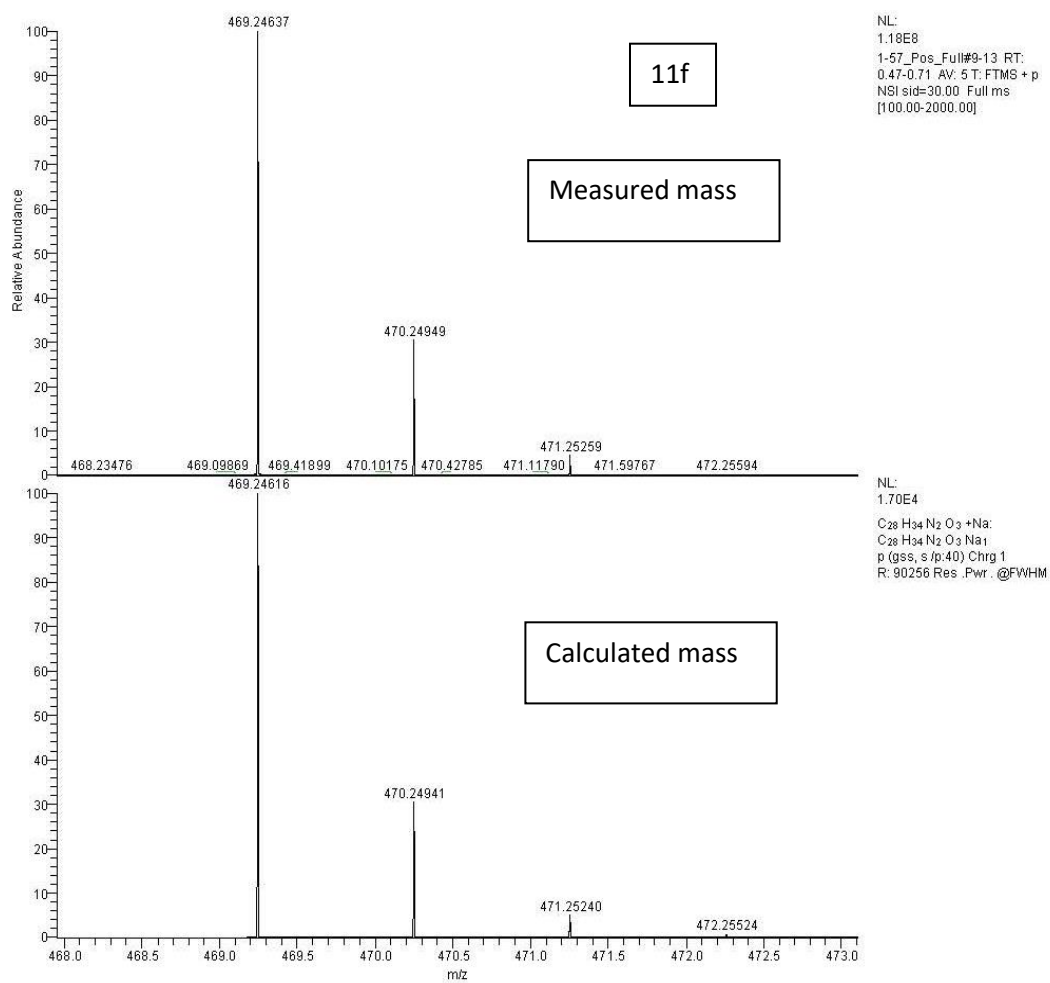

HRMS of *N*-(2-(1*H*-indol-3-yl) ethyl)-2-amino-*N*-(naphthalen-2-ylmethyl) acetamide (TFA salt)  
(12a)

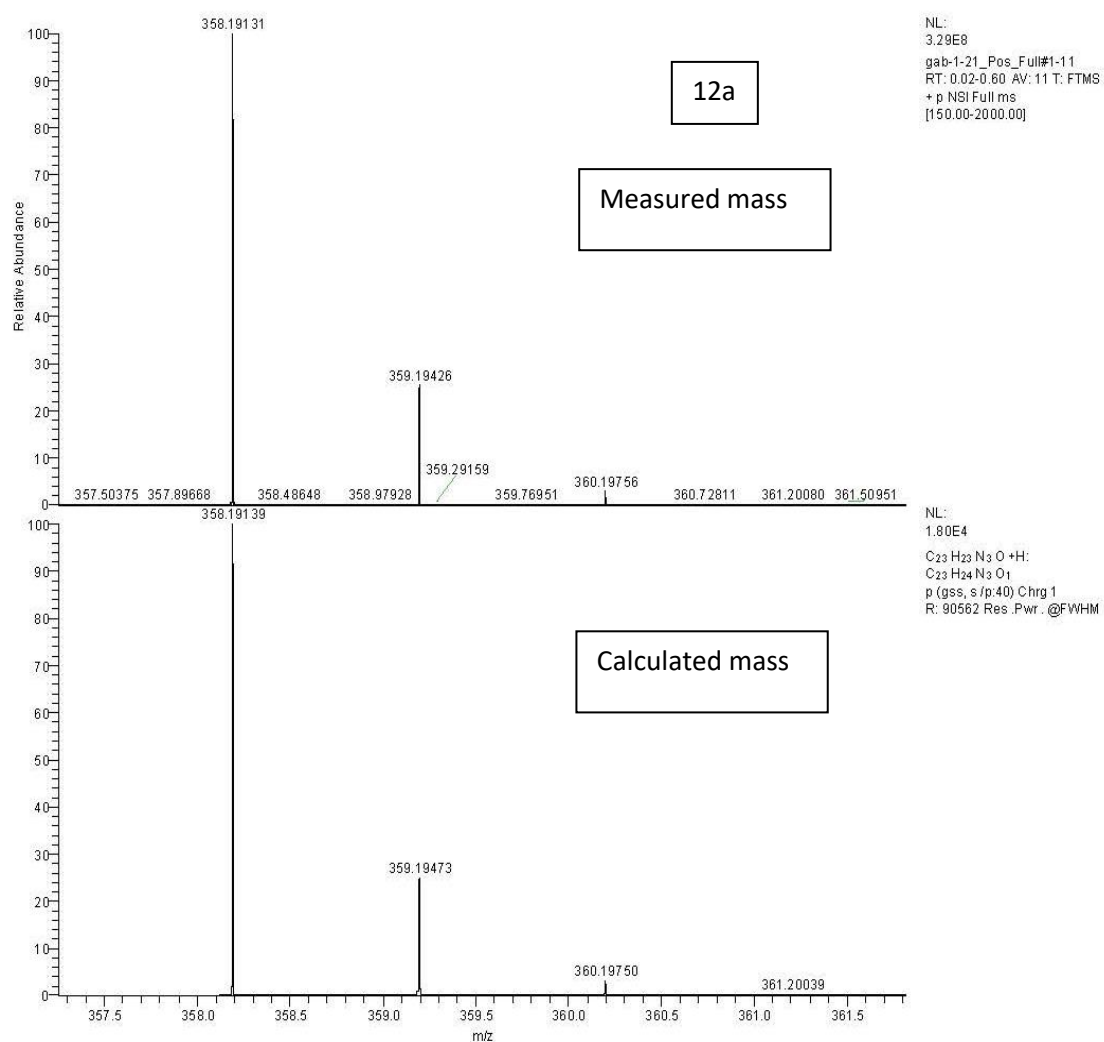

HRMS of *N*-(2-(1*H*-indol-3-yl) ethyl)-3-amino-*N*-(naphthalen-2-ylmethyl) propenamide (TFA salt)  
(12b)

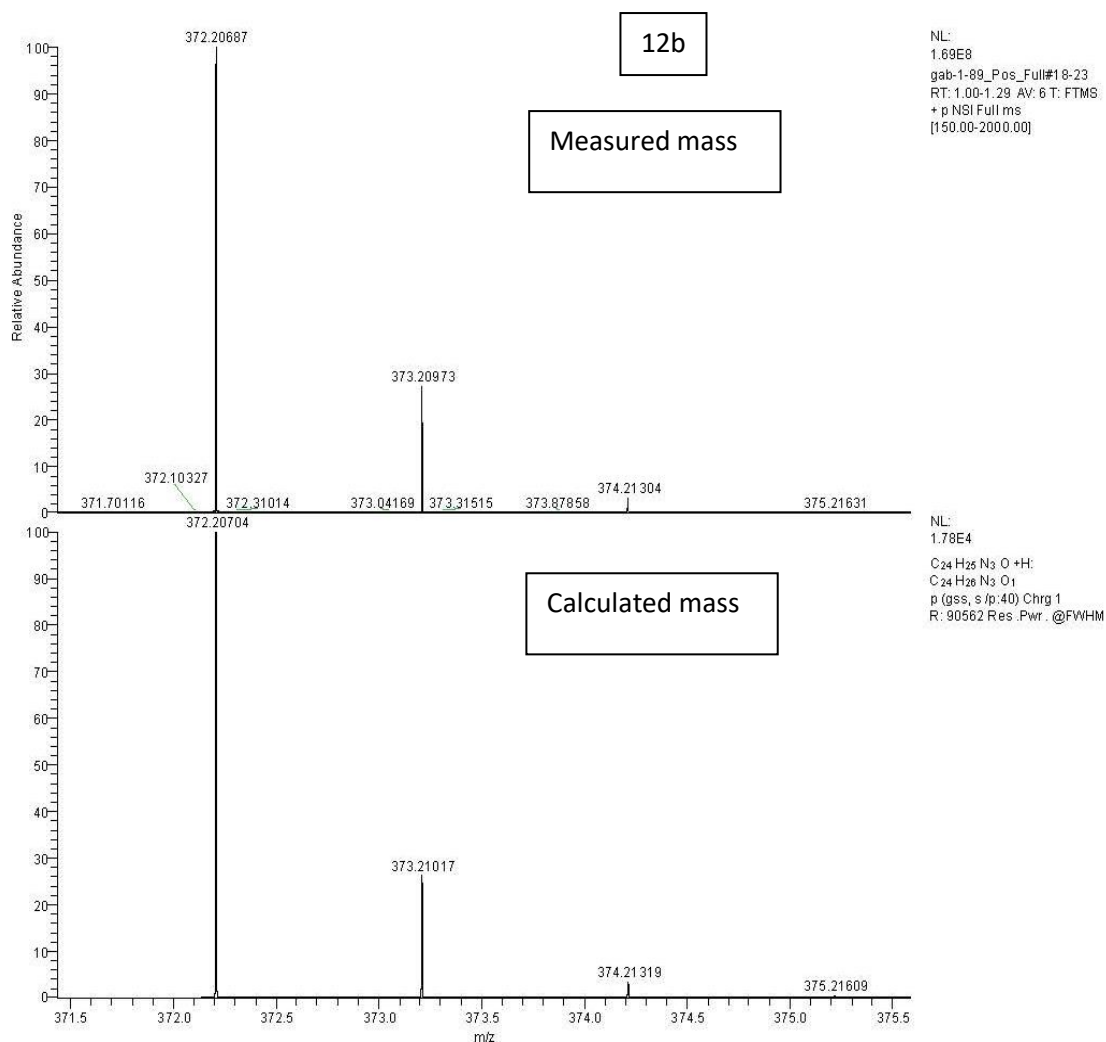

HRMS of *N*-(2-(1*H*-indol-3-yl) ethyl)-4-amino-*N*-(naphthalen-2-ylmethyl) butanamide (TFA salt)  
(12c)

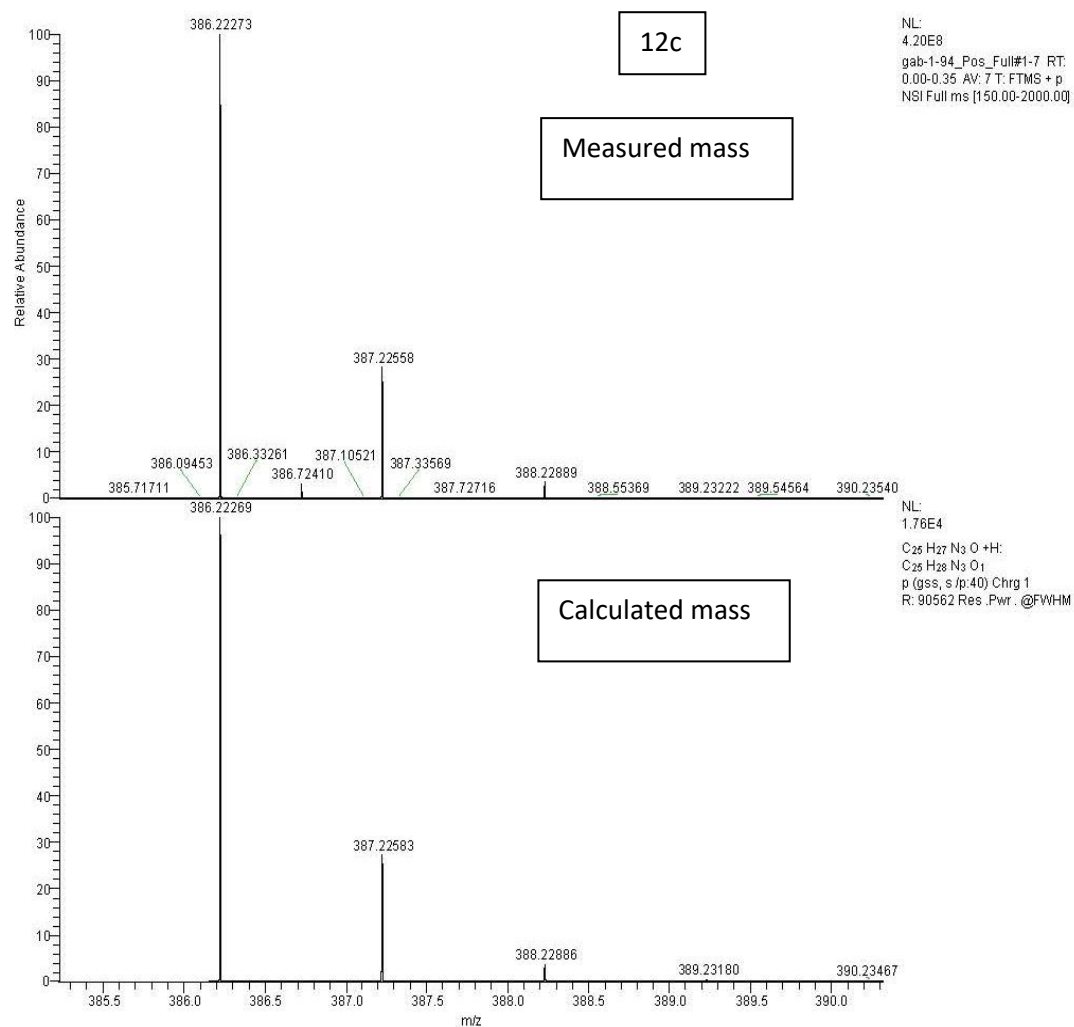



HRMS of 2-Amino-N-(naphthalen-2-ylmethyl)-N-phenethylacetamide (TFA salt) (12d)

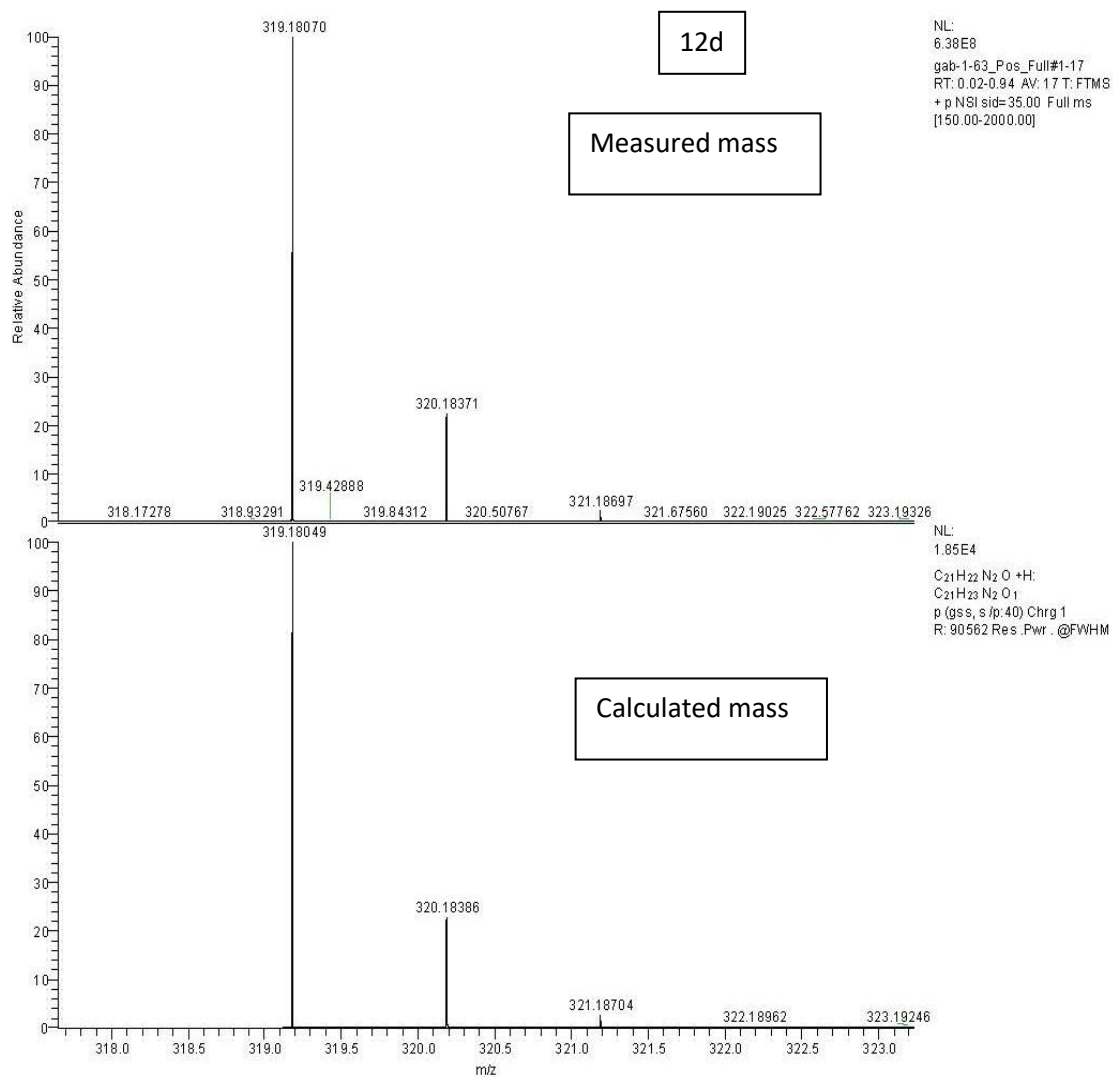

HRMS of 3-Amino-N-(naphthalen-2-ylmethyl)-N-phenethylpropanamide (TFA salt) (12e)

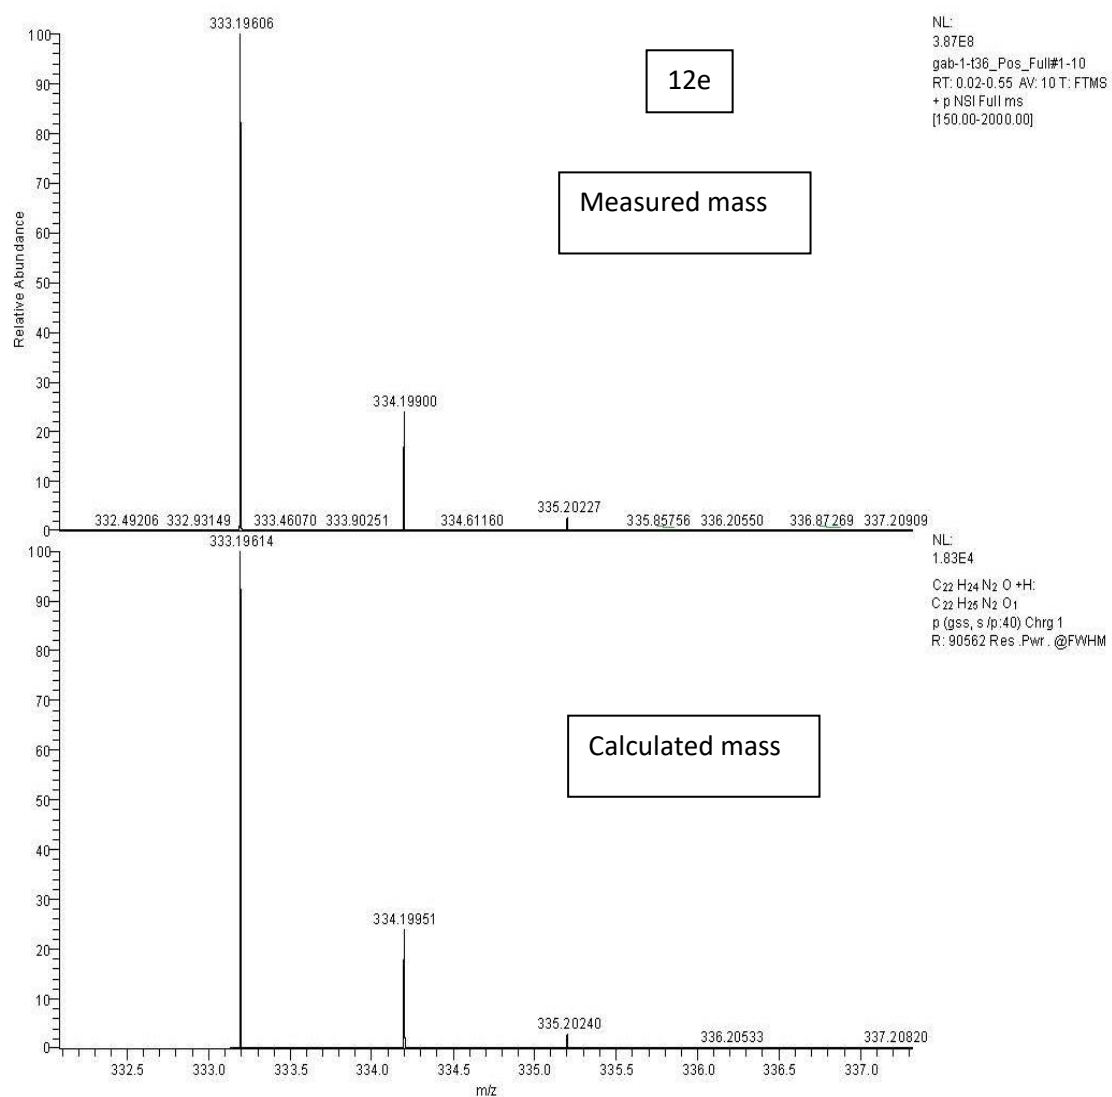

HRMS of 4-Amino-N-(naphthalen-2-ylmethyl)-N-phenethyl- butanamide (TFA salt) (12f)

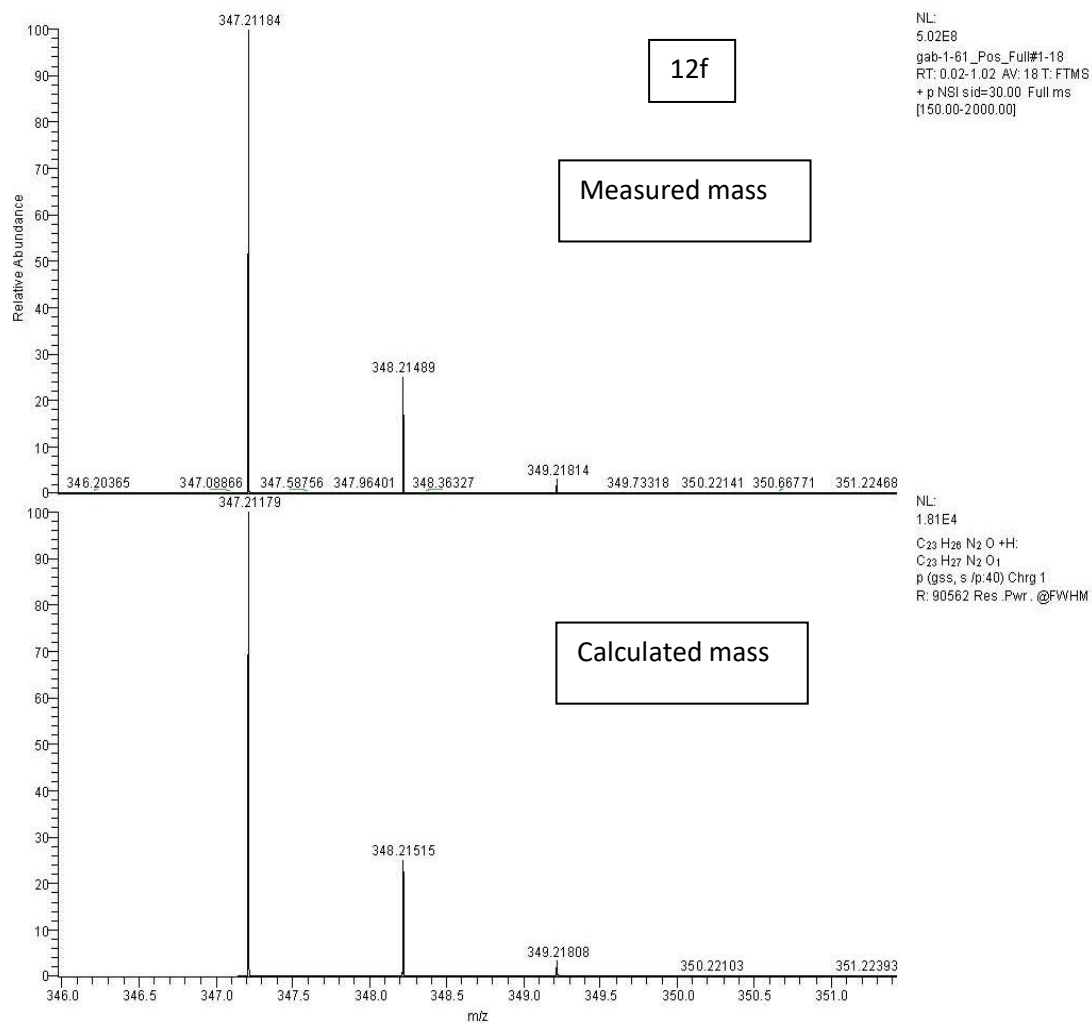

HRMS of *N*-(2-(1*H*-indol-3-yl) ethyl)-2-guanidino-*N*-(naphthalen-2-ylmethyl) acetamide

(TFAsalt)(13a)

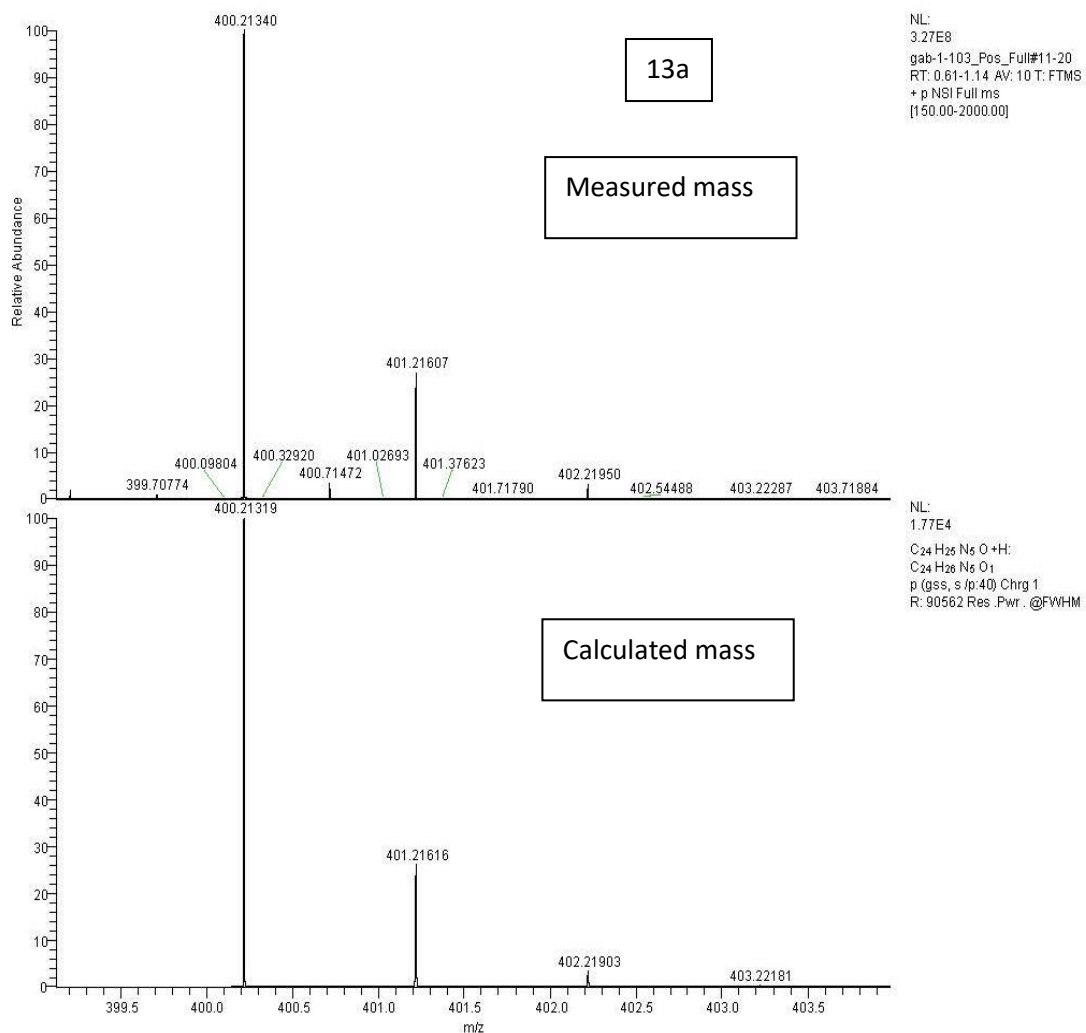

HRMS of *N*-(2-(1*H*-indol-3-yl) ethyl)-3-guanidino-*N*-(naphthalen-2-ylmethyl) propenamide (TFA salt) (**13b**)

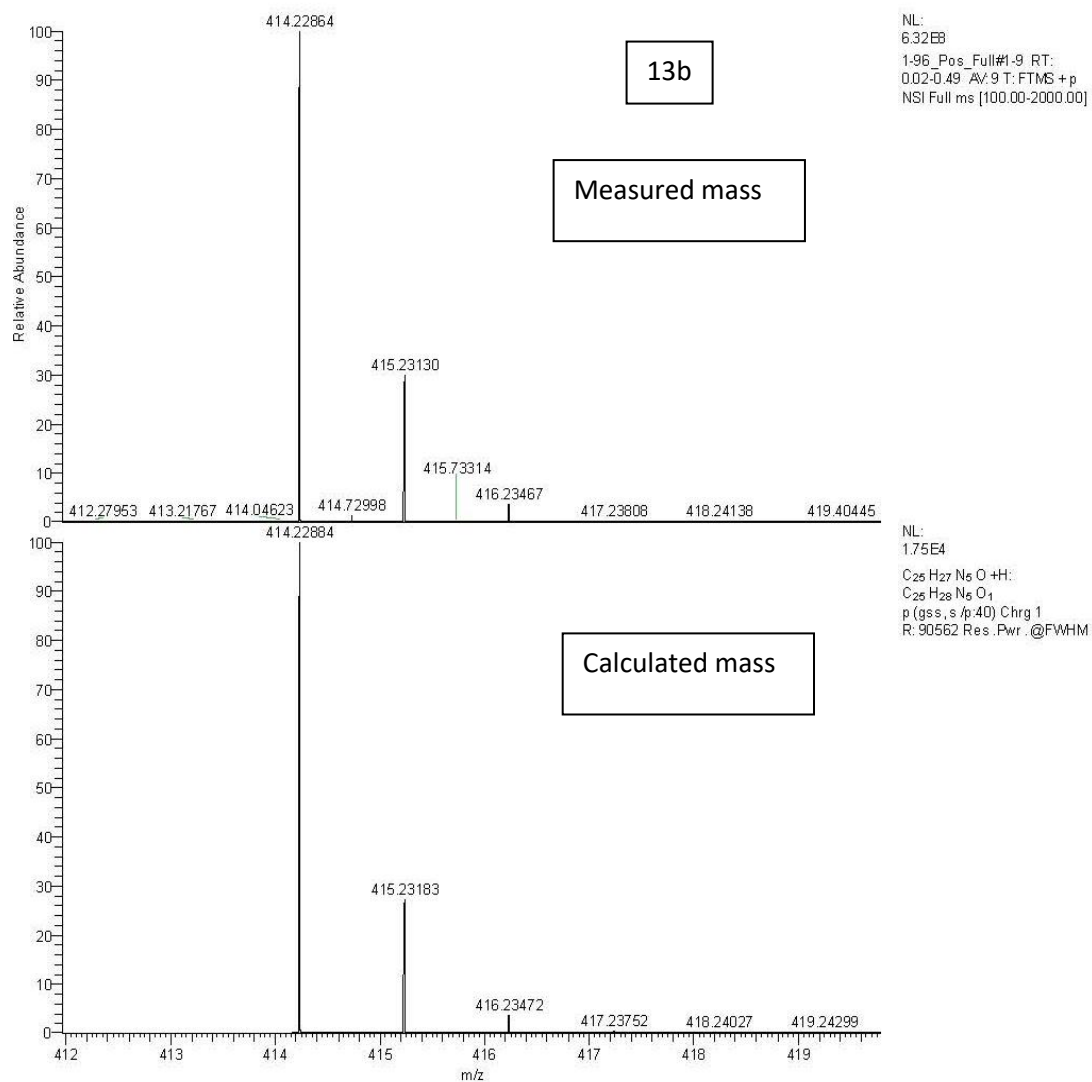

HRMS of *N*-(2-(1*H*-indol-3-yl) ethyl)-4-guanidino-*N*-(naphthalen-2-ylmethyl) butanamide (TFA salt) (**13c**)

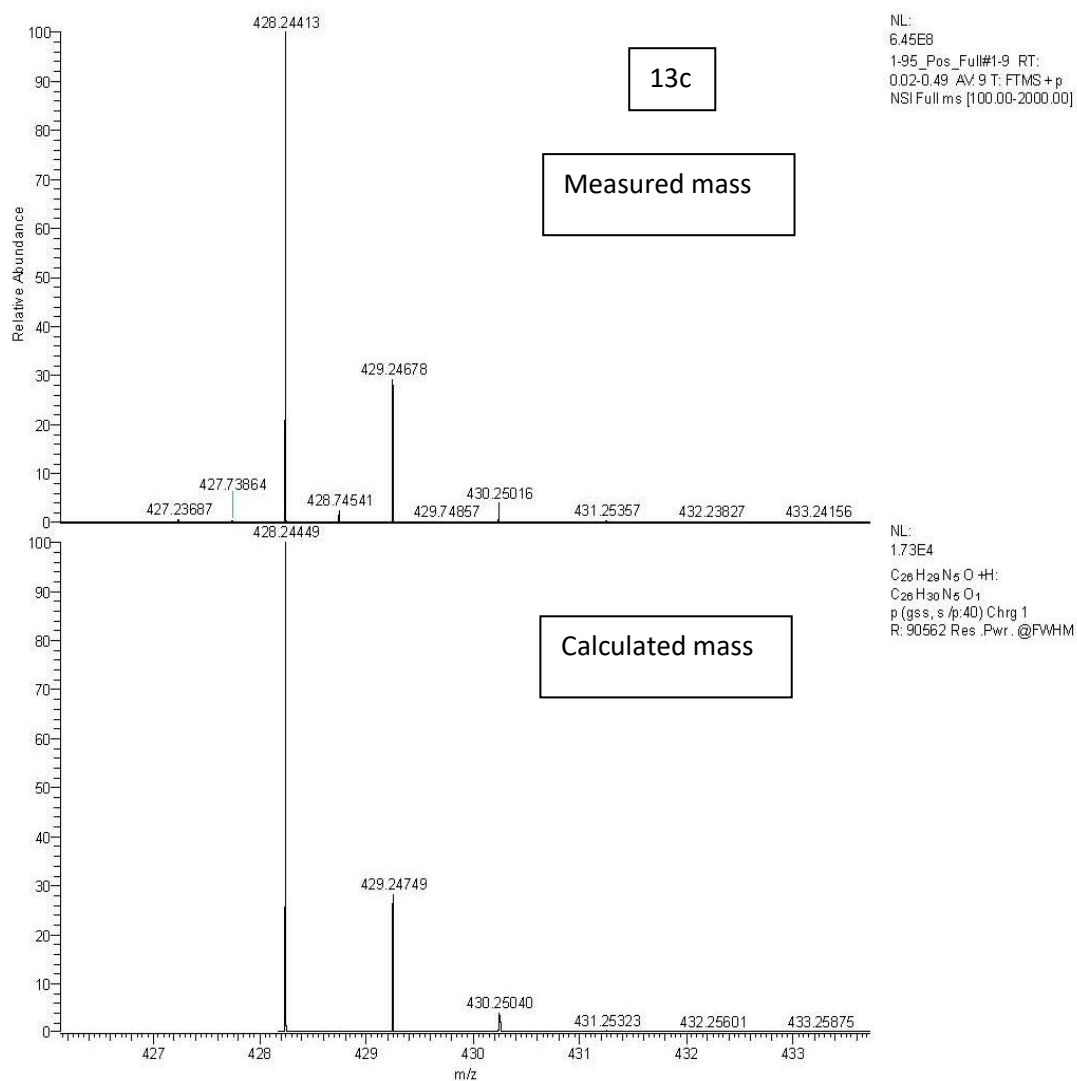

HRMS of 2-Guanidino-N-(naphthalen-2-ylmethyl)-N-phenethyl acetamide (TFA salt) (13d)

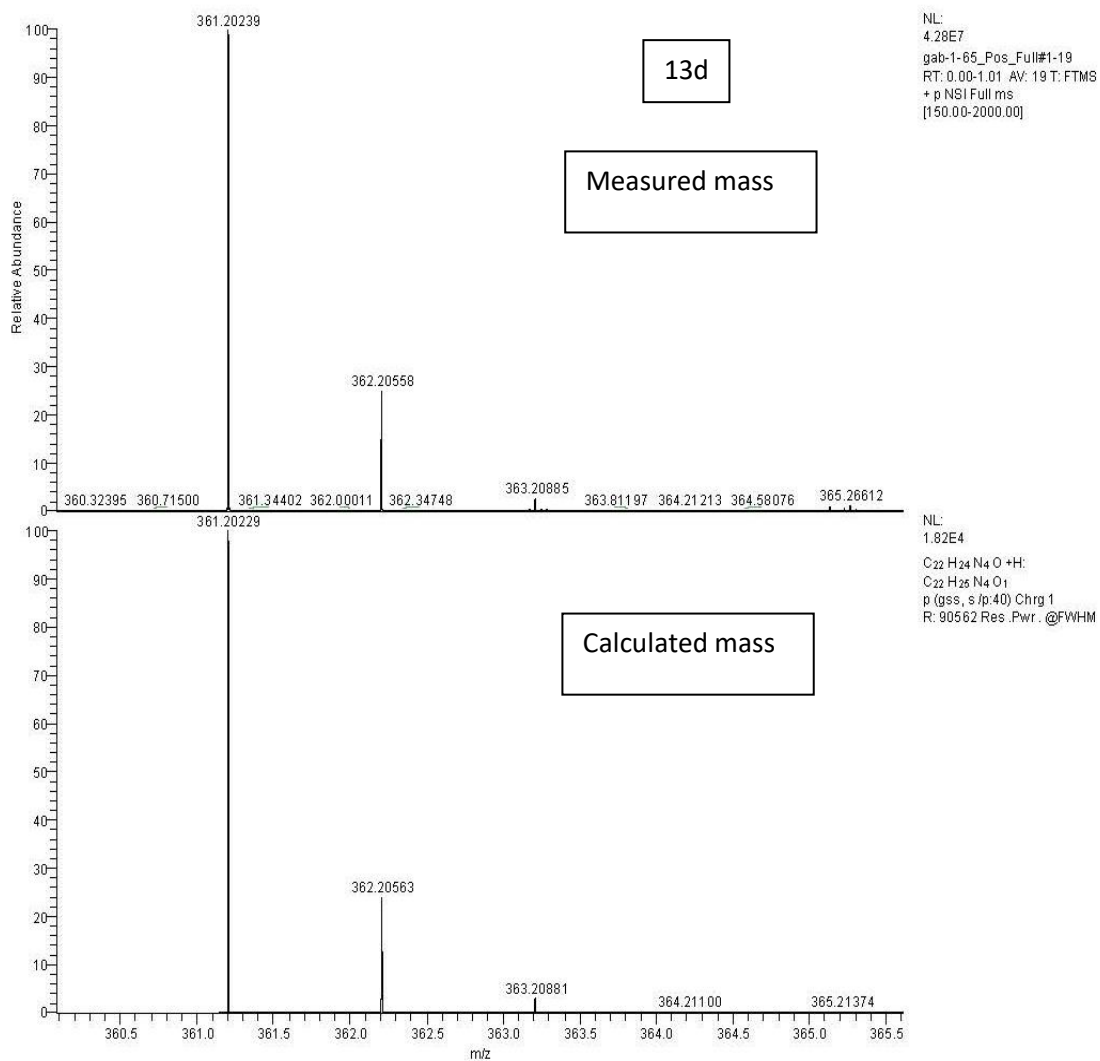

HRMS of 3-Guanidino-N-(naphthalen-2-ylmethyl)-N-phenethyl- propanamide (TFA salt) (13e)

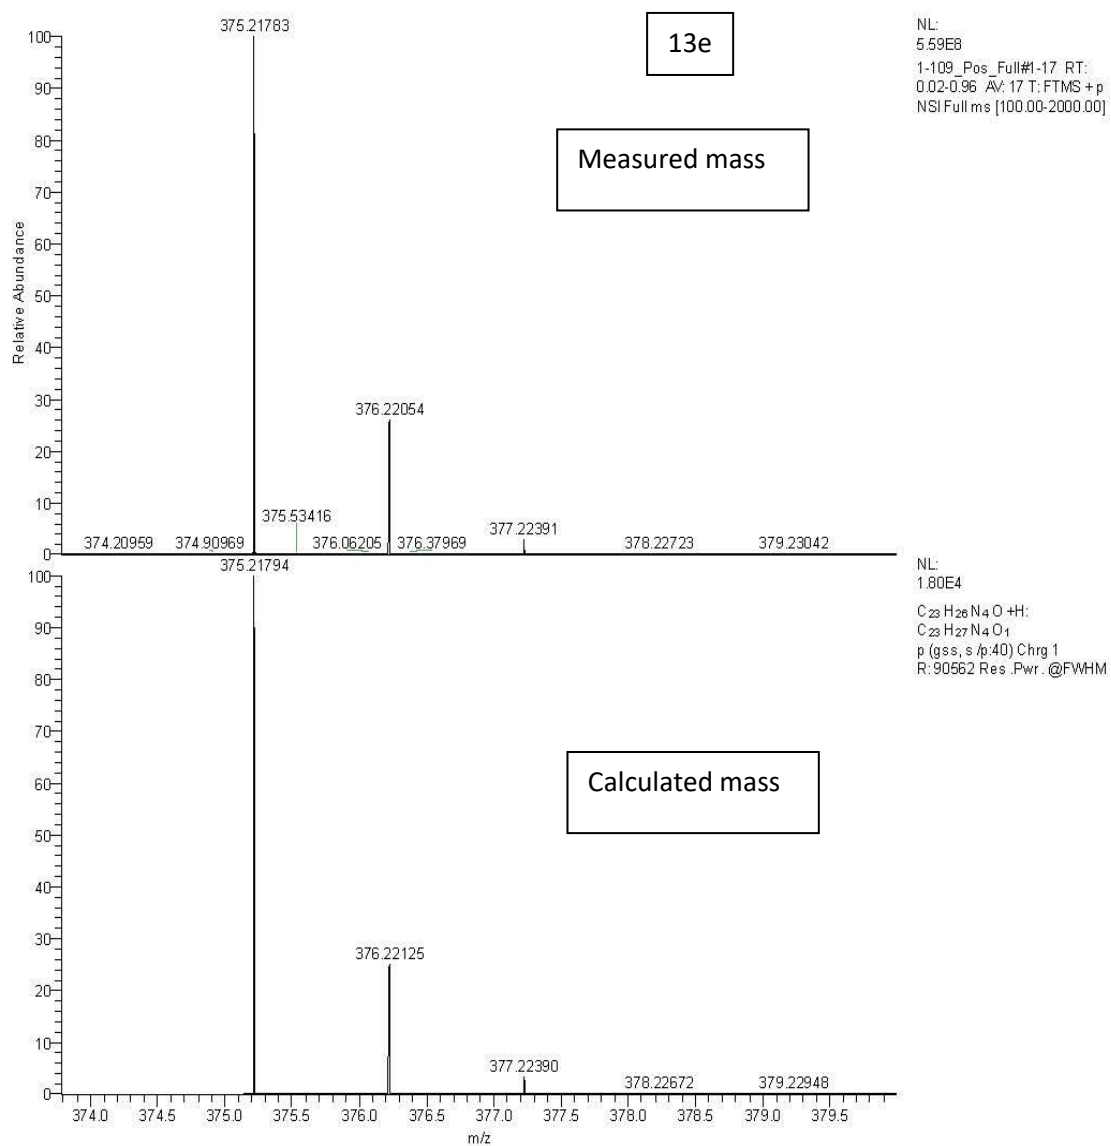



HRMS of 4-Guanidino-N-(naphthalen-2-ylmethyl)-N-phenethyl- butanamide (TFA salt) (13f)

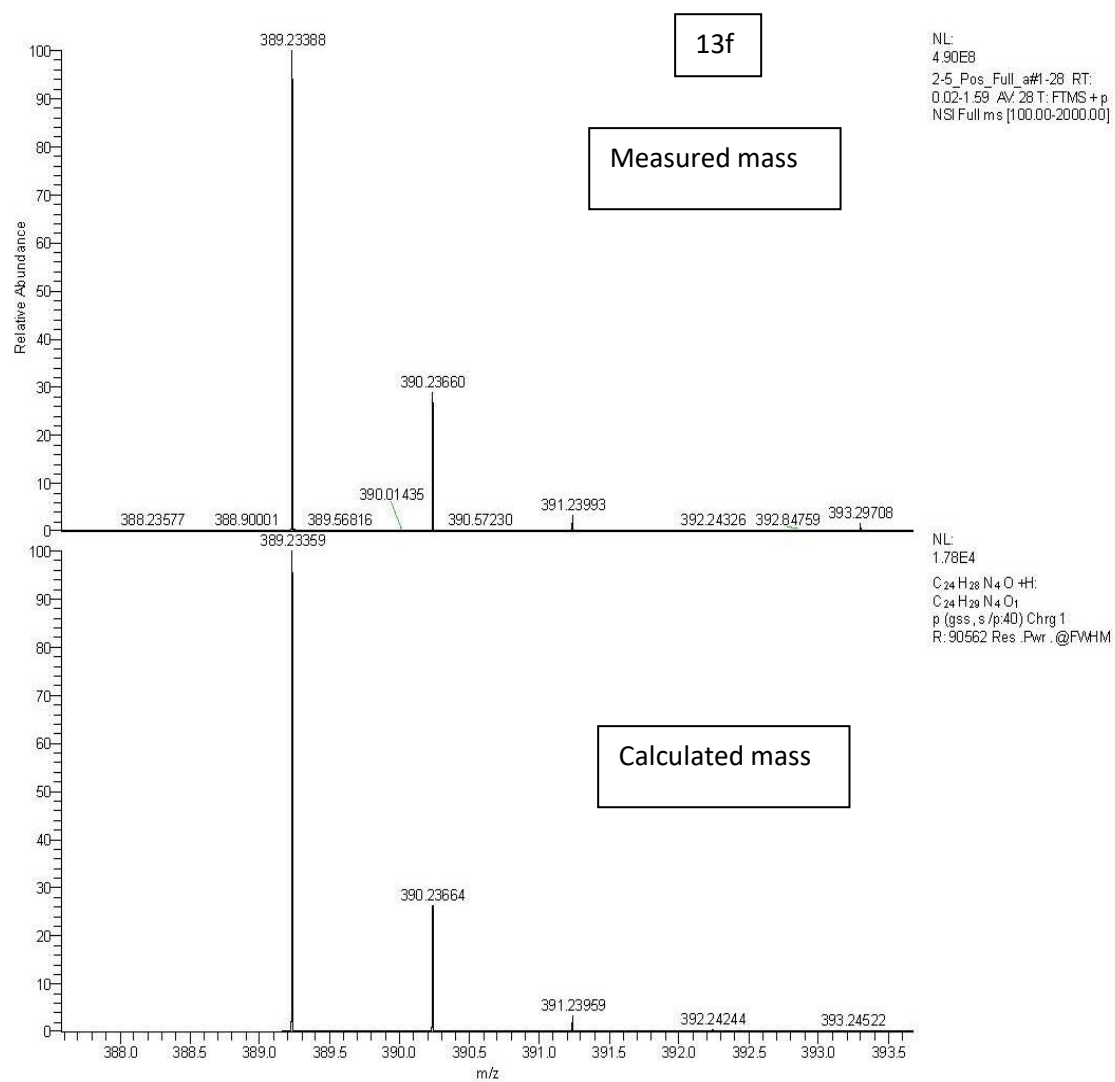

HRMS of *N*-(2-(1*H*-indol-3-yl) ethyl)-3-(dimethylamino)-*N*-(naphthalen-2-ylmethyl) propenamide  
(14a)

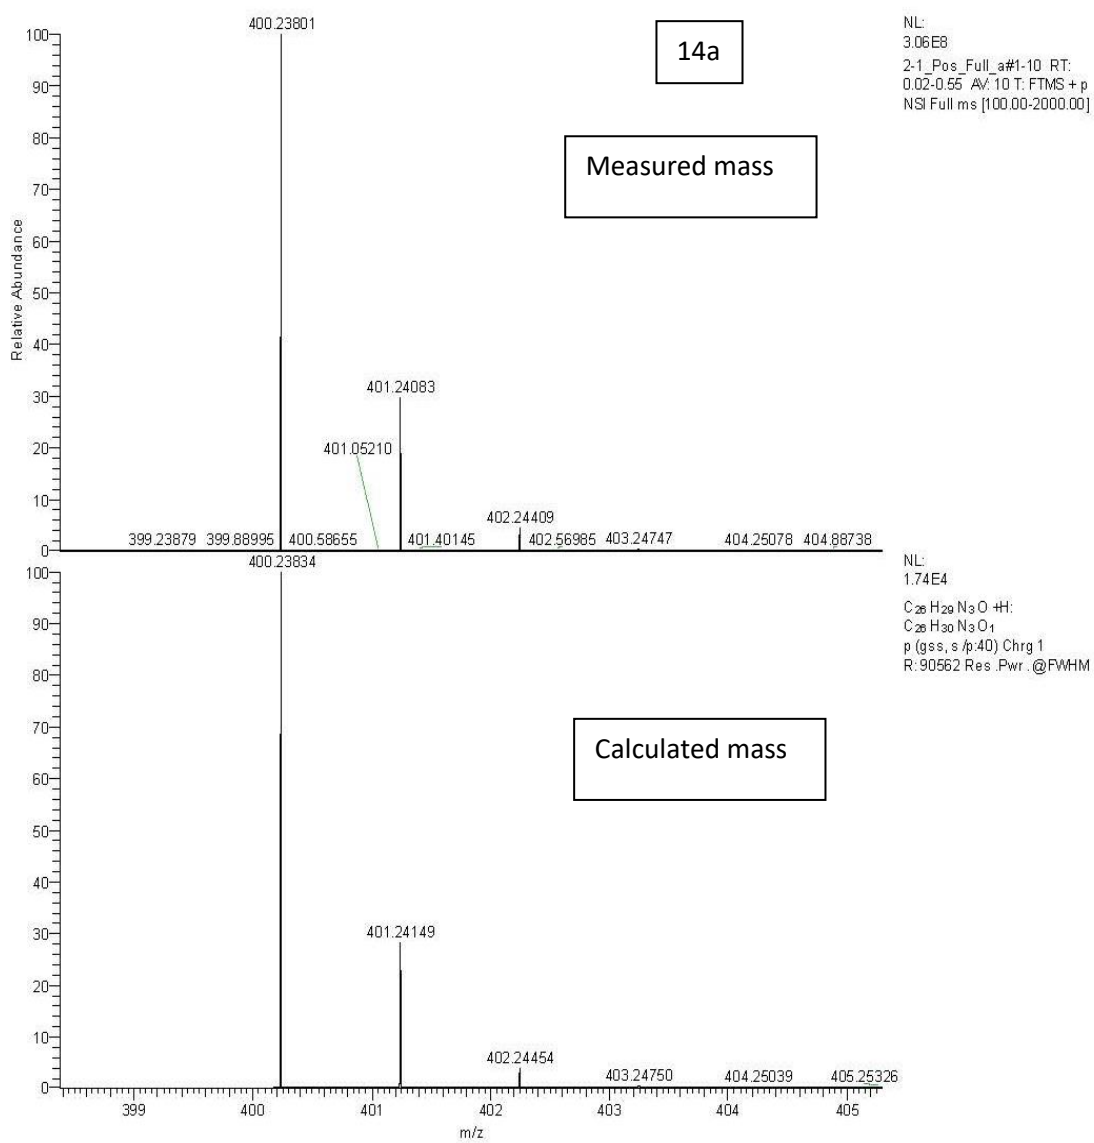

HRMS of *N*-(2-(1*H*-indol-3-yl) ethyl)-4-(dimethylamino)-*N*-(naphthalen-2-ylmethyl) butanamide  
(14b)

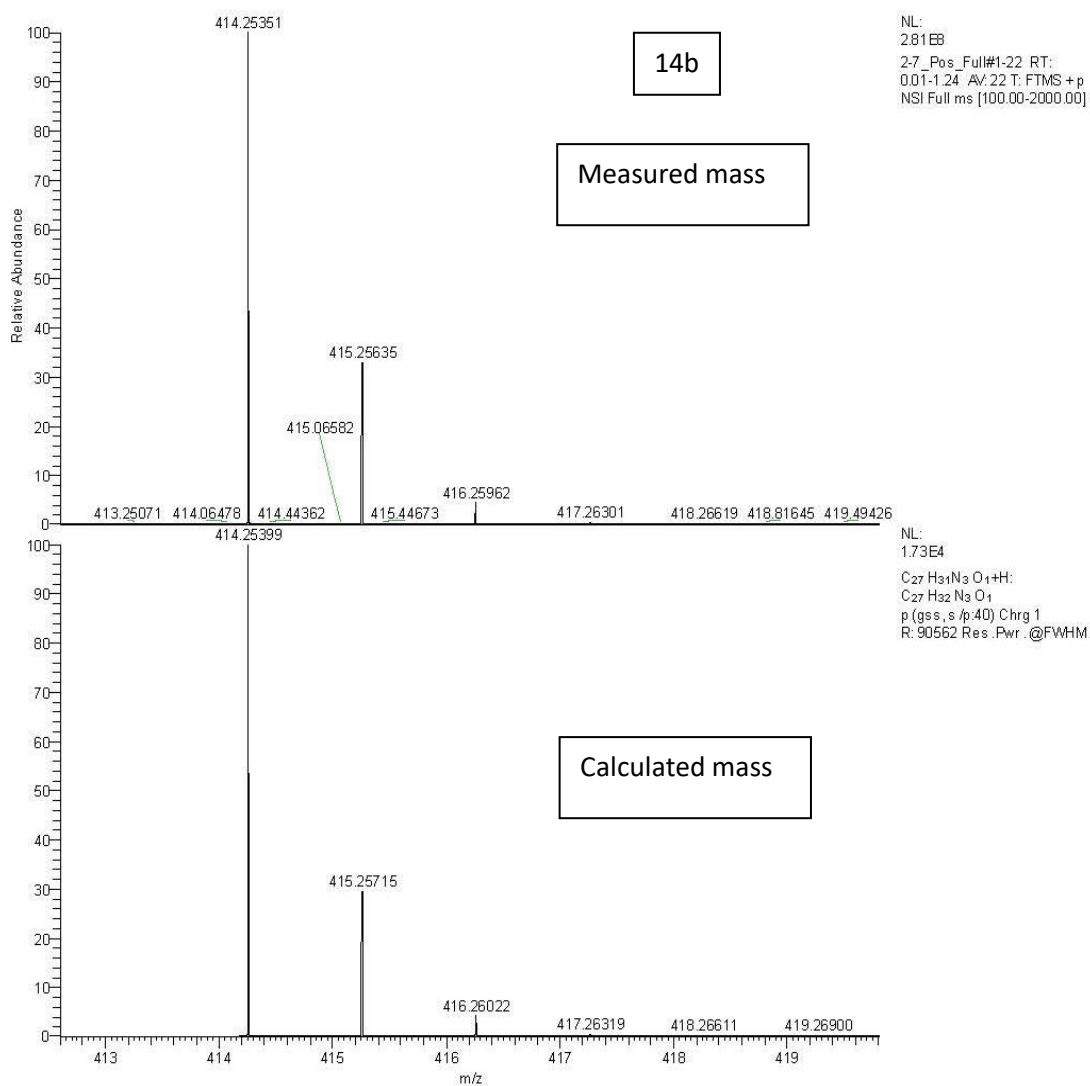

HRMS of 4-(Dimethylamino)-N-(naphthalen-2-ylmethyl)-N-phenethyl-butanamide (14c)

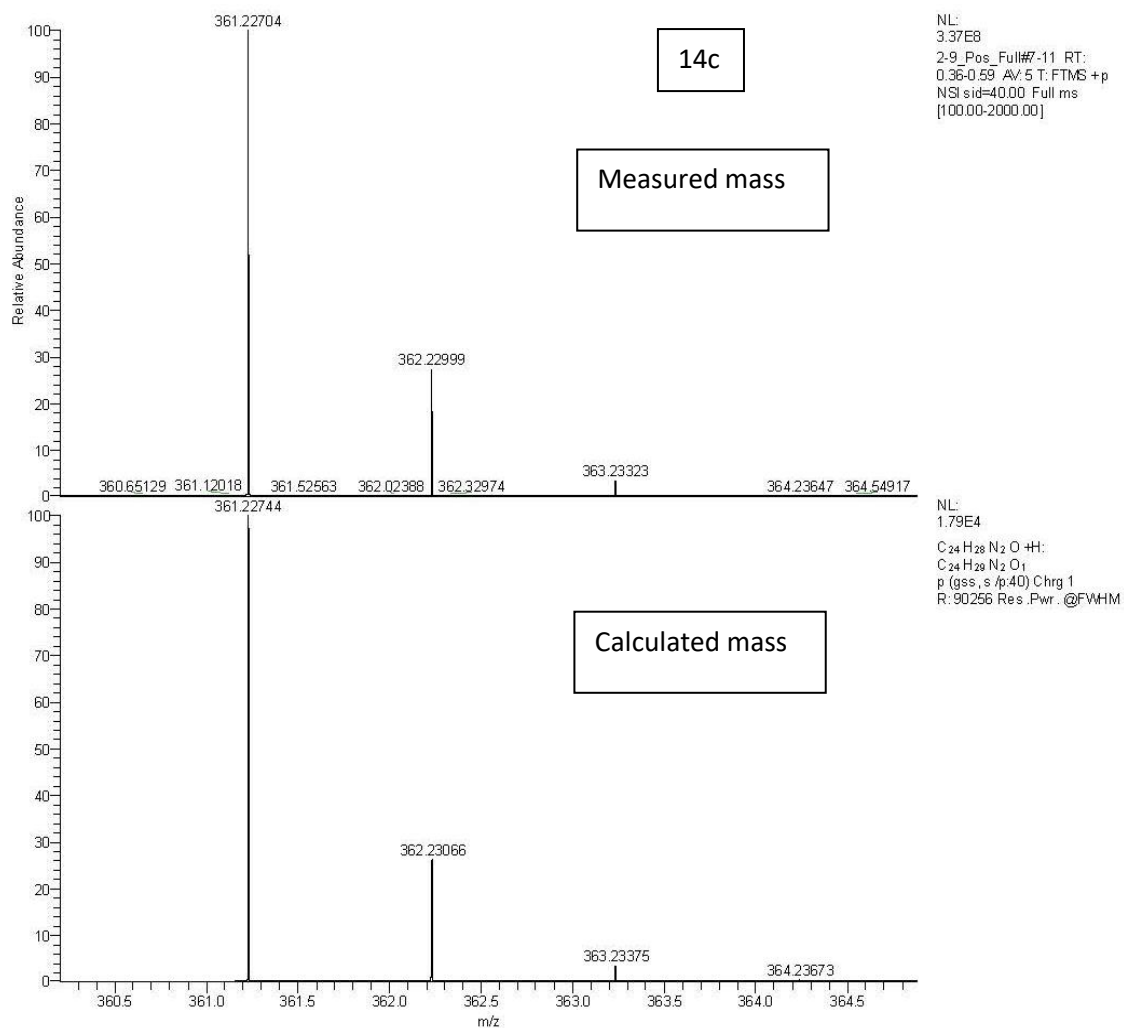

HRMS of 3-(Dimethylamino)-N-(naphthalen-2-ylmethyl)-N-phenethyl-propanamide (14d)

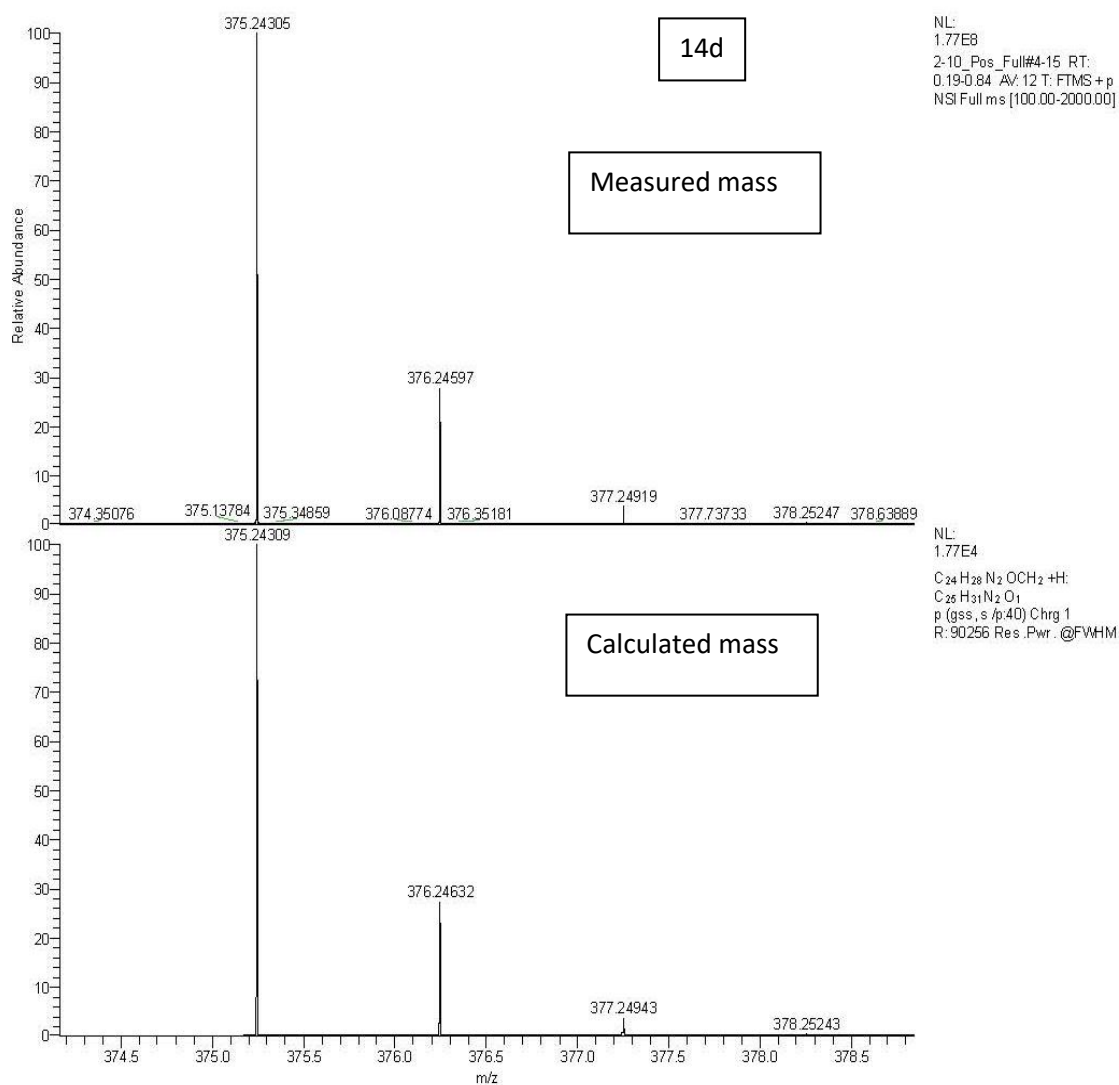

HRMS of *N*-(2-(1*H*-indol-3-yl) ethyl)-3-(dimethylamino)-*N*-(naphthalen-2-ylmethyl) propenamide  
(15a)

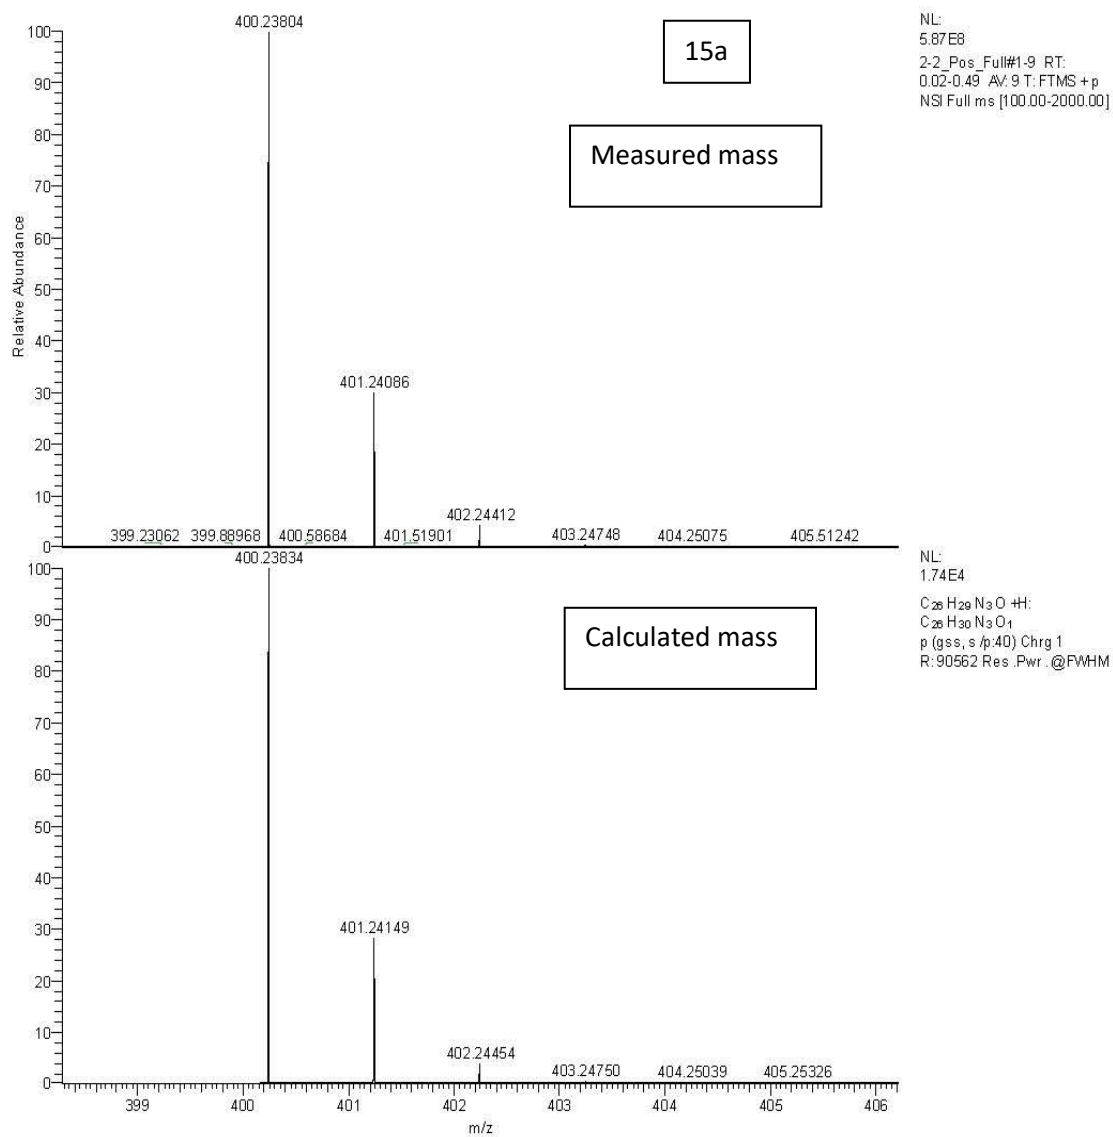

HRMS of *N*-(2-(1*H*-indol-3-yl) ethyl)-4-(dimethylamino)-*N*-(naphthalen-2-ylmethyl) butanamide  
(15b)

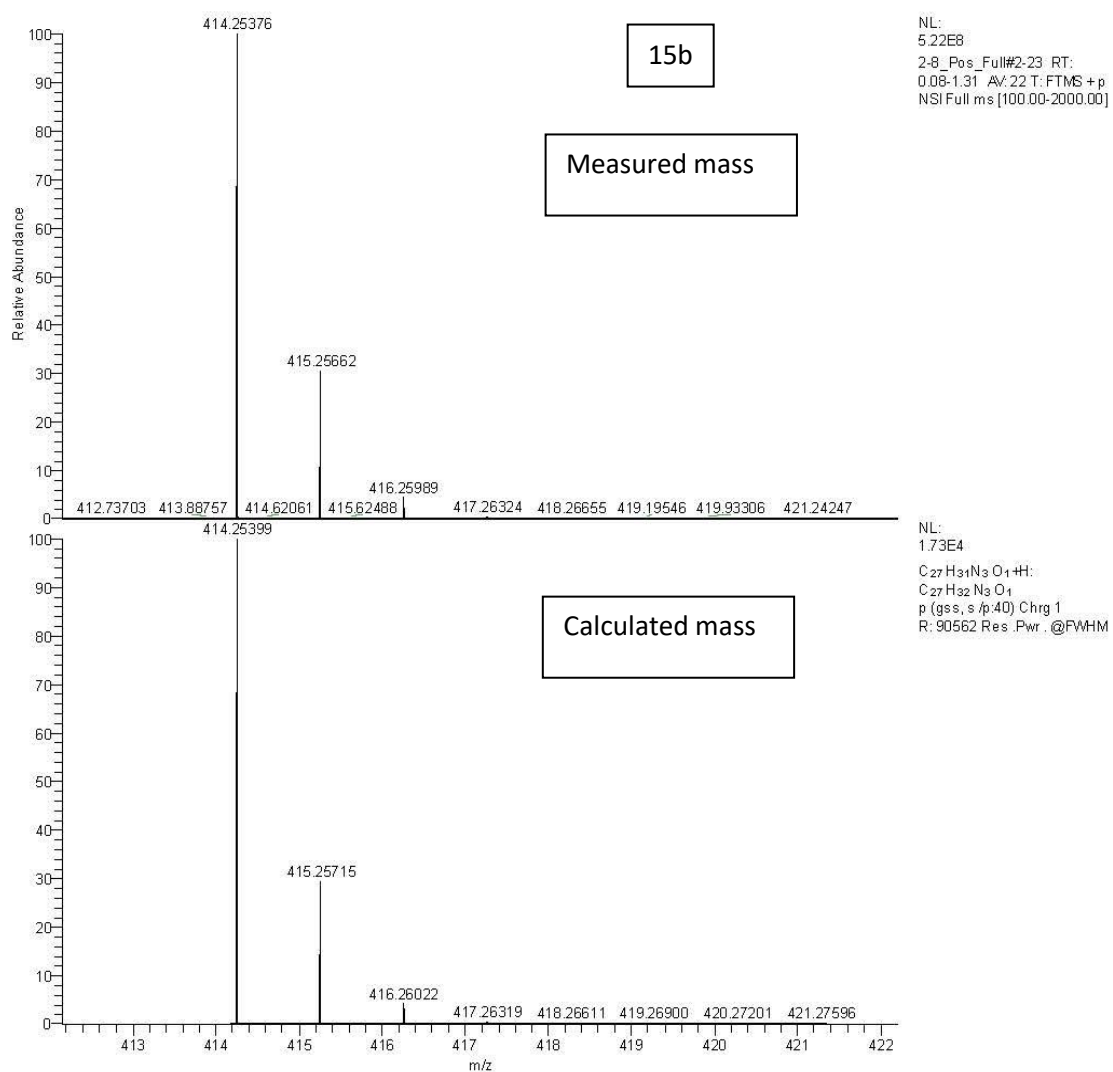

HRMS of 3-(Dimethylamino)-N-(naphthalen-2-ylmethyl)-N-phenethyl-propanamide (15c)

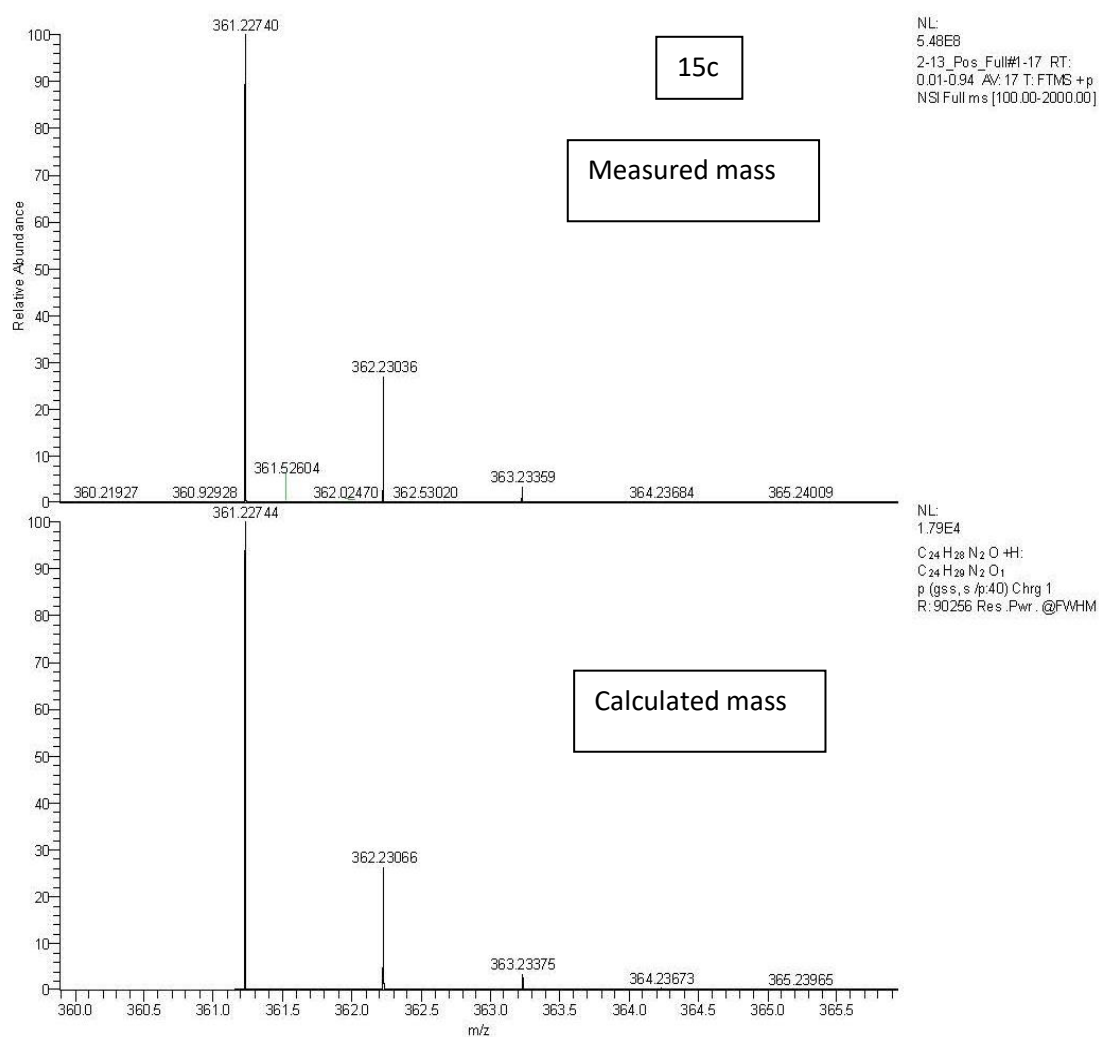



HRMS of 4-(Dimethylamino)-N-(naphthalen-2-ylmethyl)-N-phenethyl-butanamide (15d)

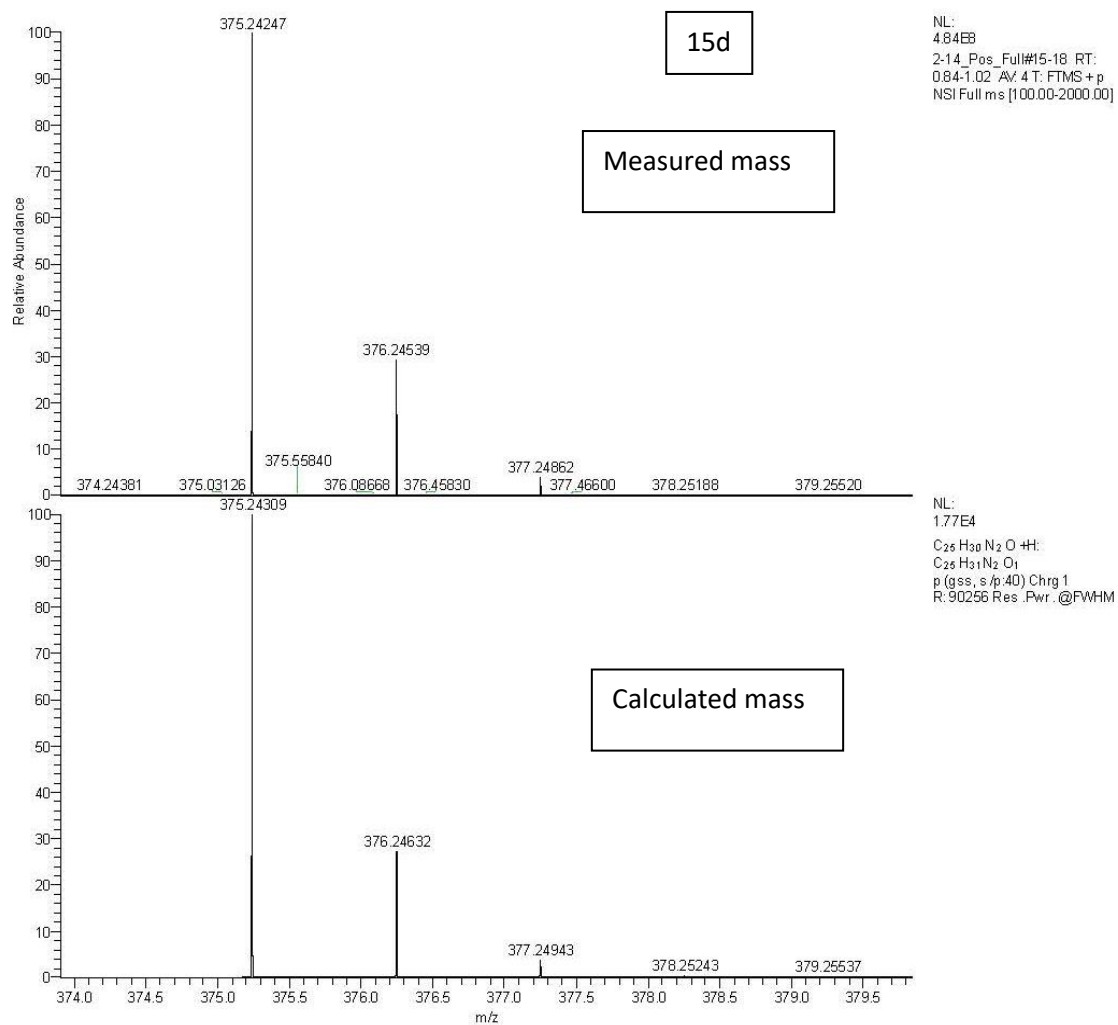

HRMS of 3-((2-(1H-indol-3-yl) ethyl) (naphthalen-2-ylmethyl) amino)-N,N,N-trimethyl-3-oxopropan-1-aminium (16a)

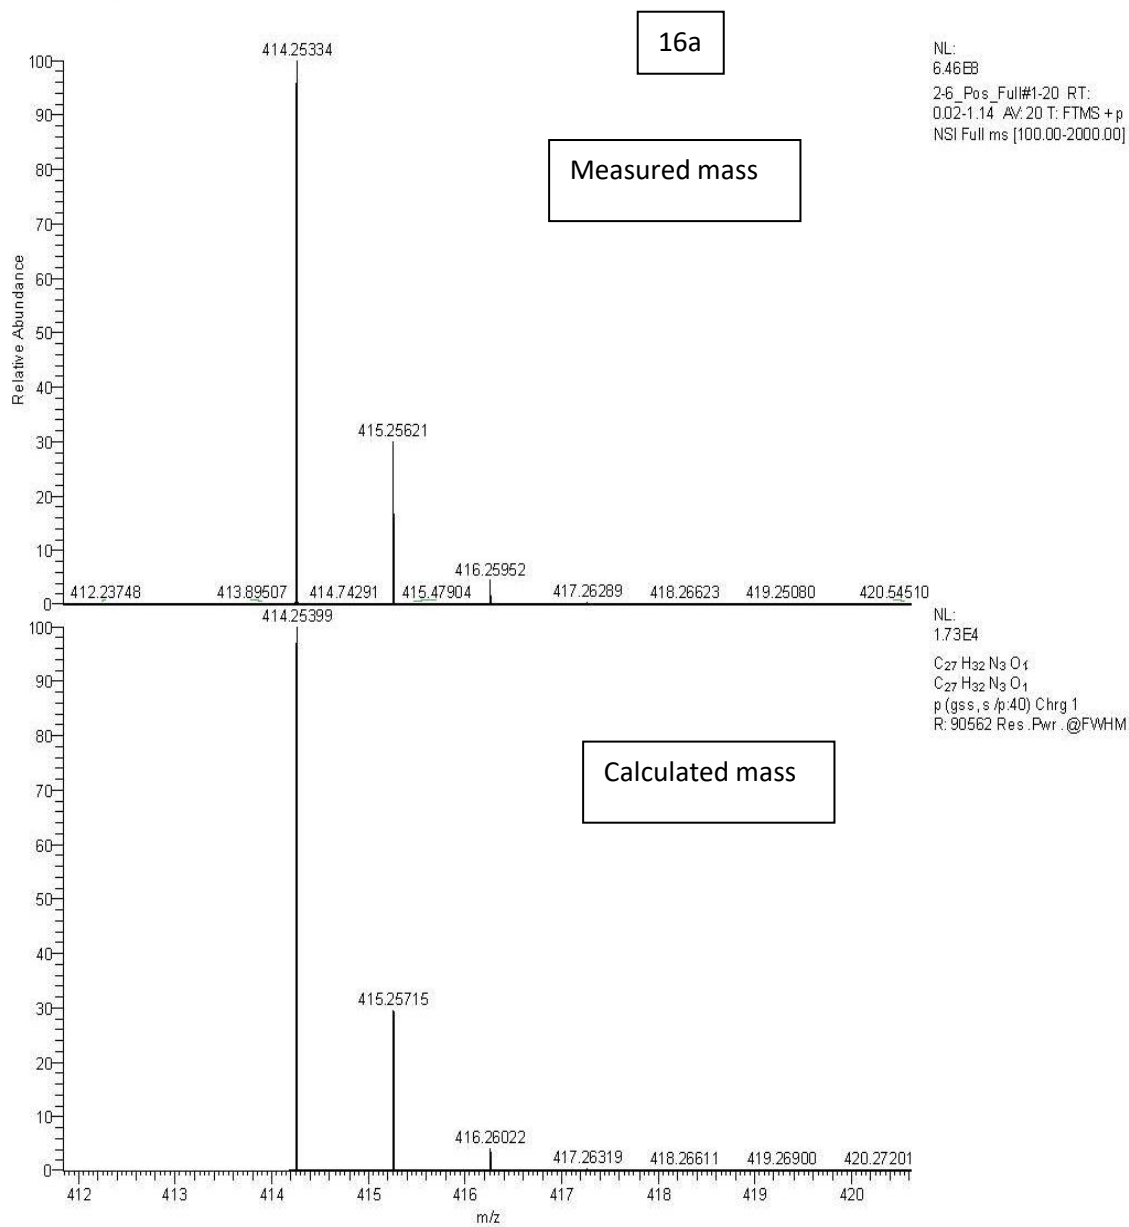

HRMS of 4-((2-(1H-indol-3-yl) ethyl) (naphthalen-2-ylmethyl) amino)-N,N,N-trimethyl-4-oxobutan-1-aminium (16b)

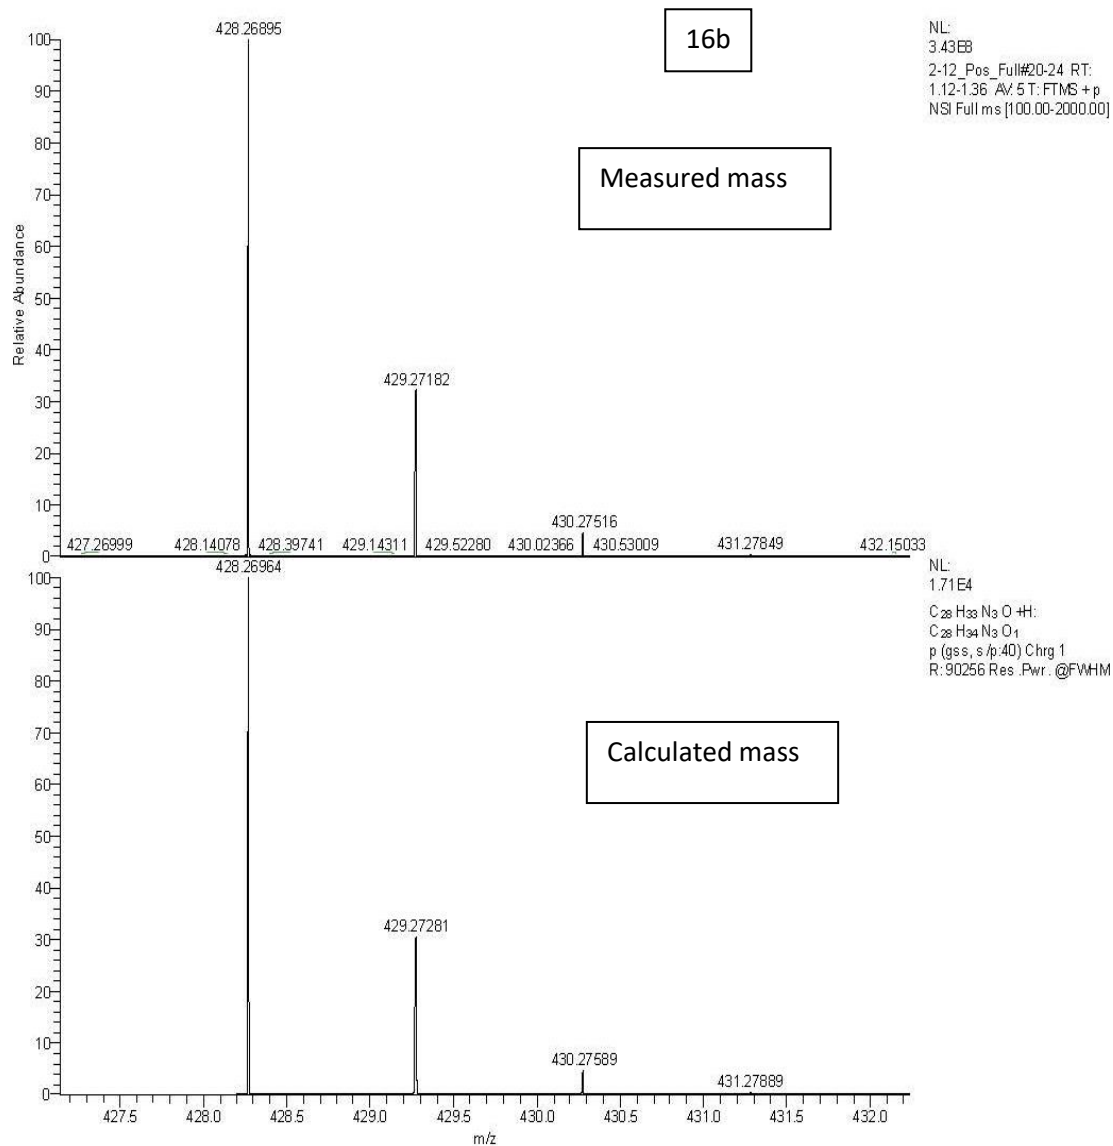

HRMS of *N,N,N*-Trimethyl-3-((naphthalen-2-ylmethyl)(phenethyl) amino)-3-oxopropan-1-aminium  
(16c)

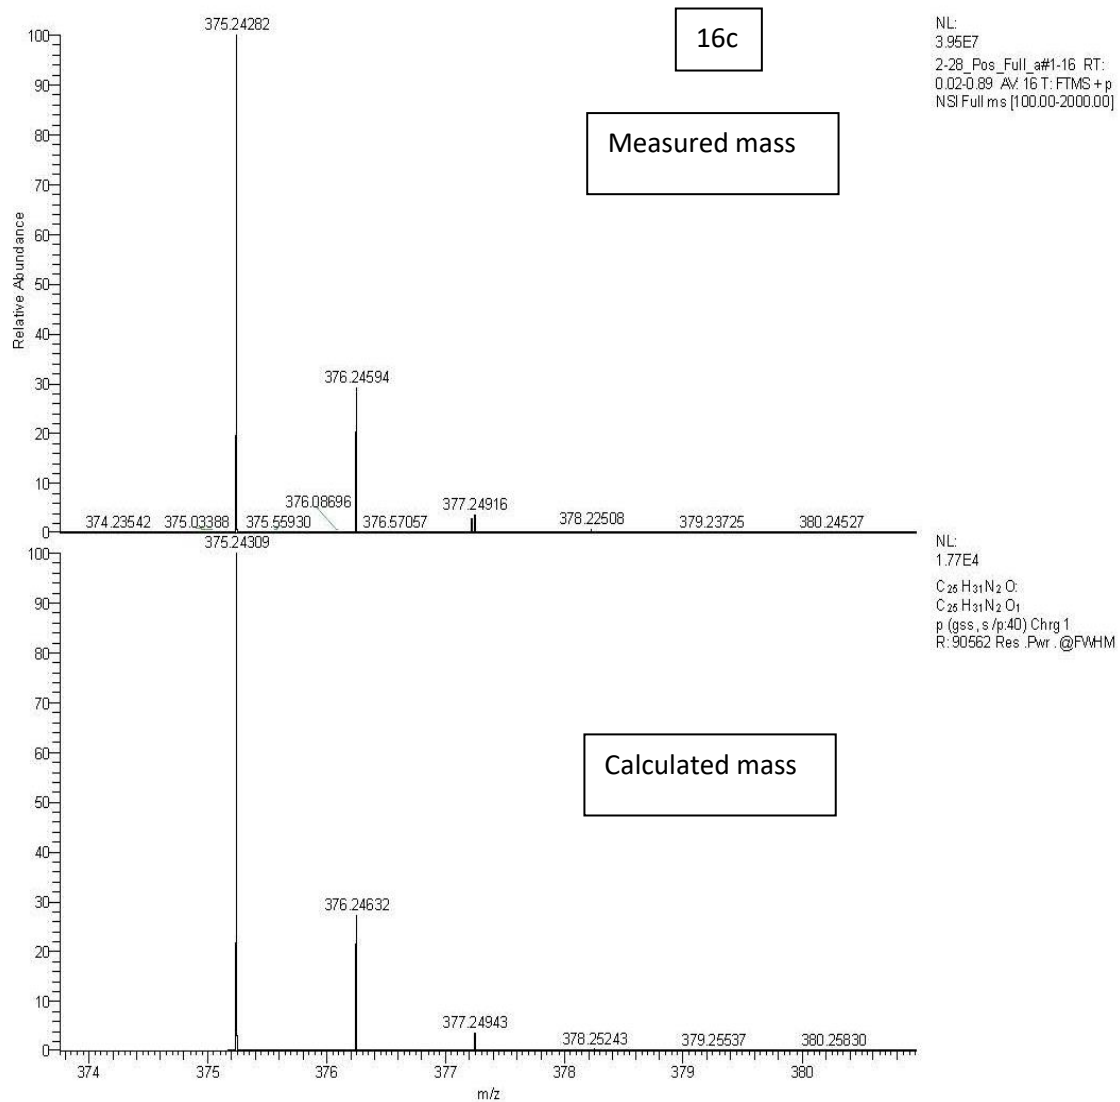

*HRMS of N,N,N-Trimethyl-4-((naphthalen-2-ylmethyl)(phenethyl) amino)-4-oxobutan-1-aminium (16d)*

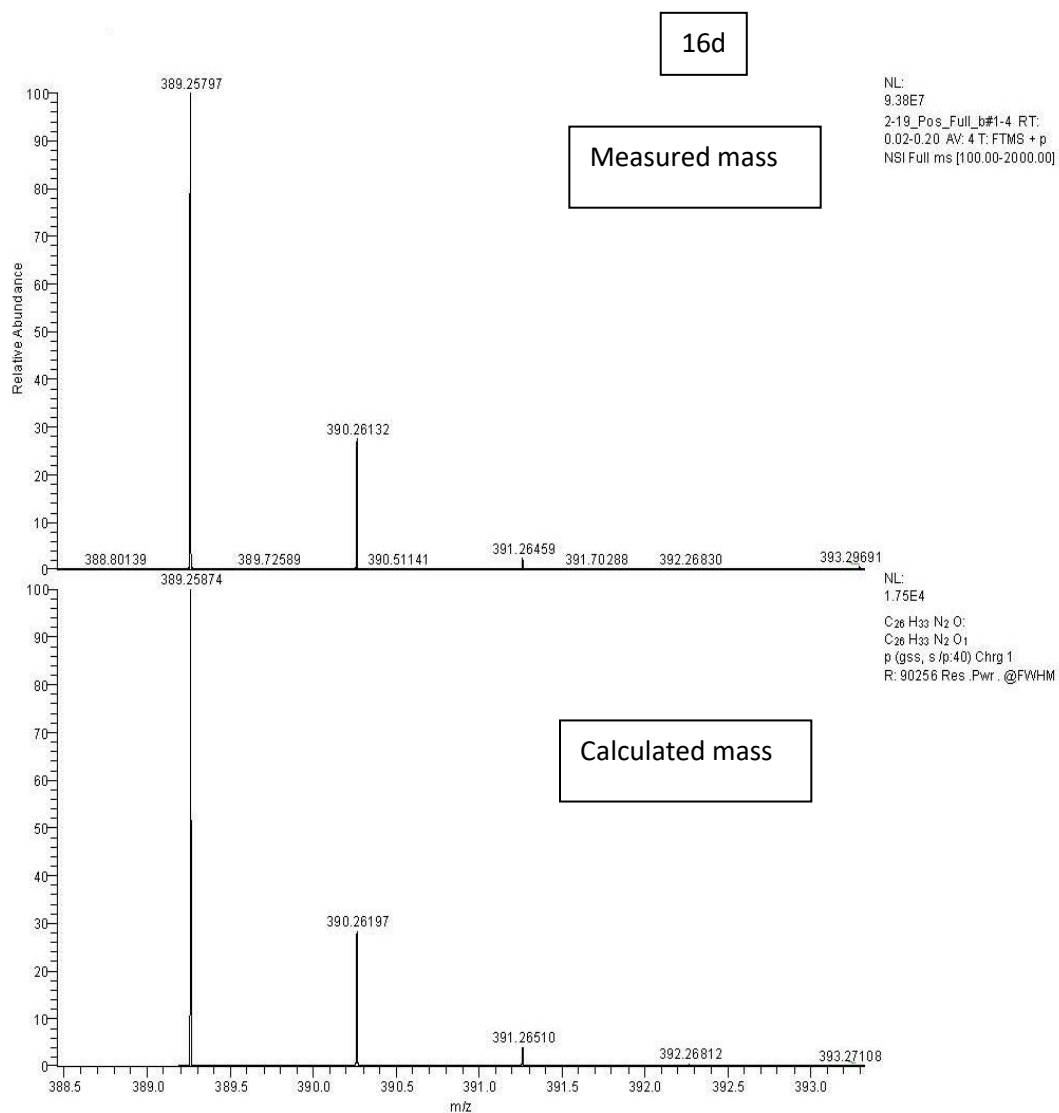

HRMS of Di-*tert*-butyl(5-((2-(1*H*-indol-3-yl) ethyl) (naphthalen-2-ylmethyl) amino)-5-oxopentane-1,4-diyl) (*S*)-dicarbamate (18a)

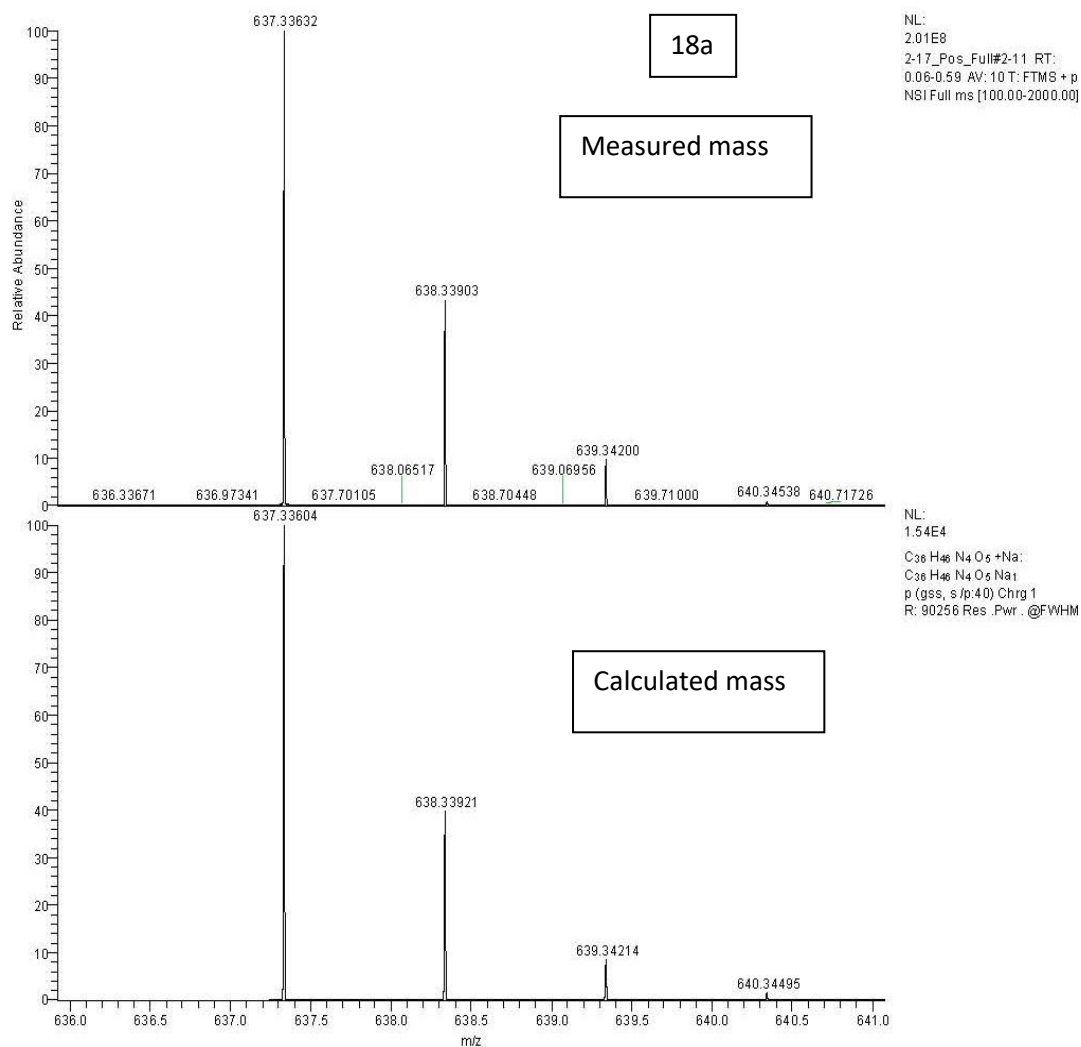

HRMS of Di-*tert*-butyl(6-((2-(1*H*-indol-3-yl) ethyl) (naphthalen-2-ylmethyl) amino)-6-oxohexane-1,5-diyl) (*S*)-dicarbamate (**18b**)

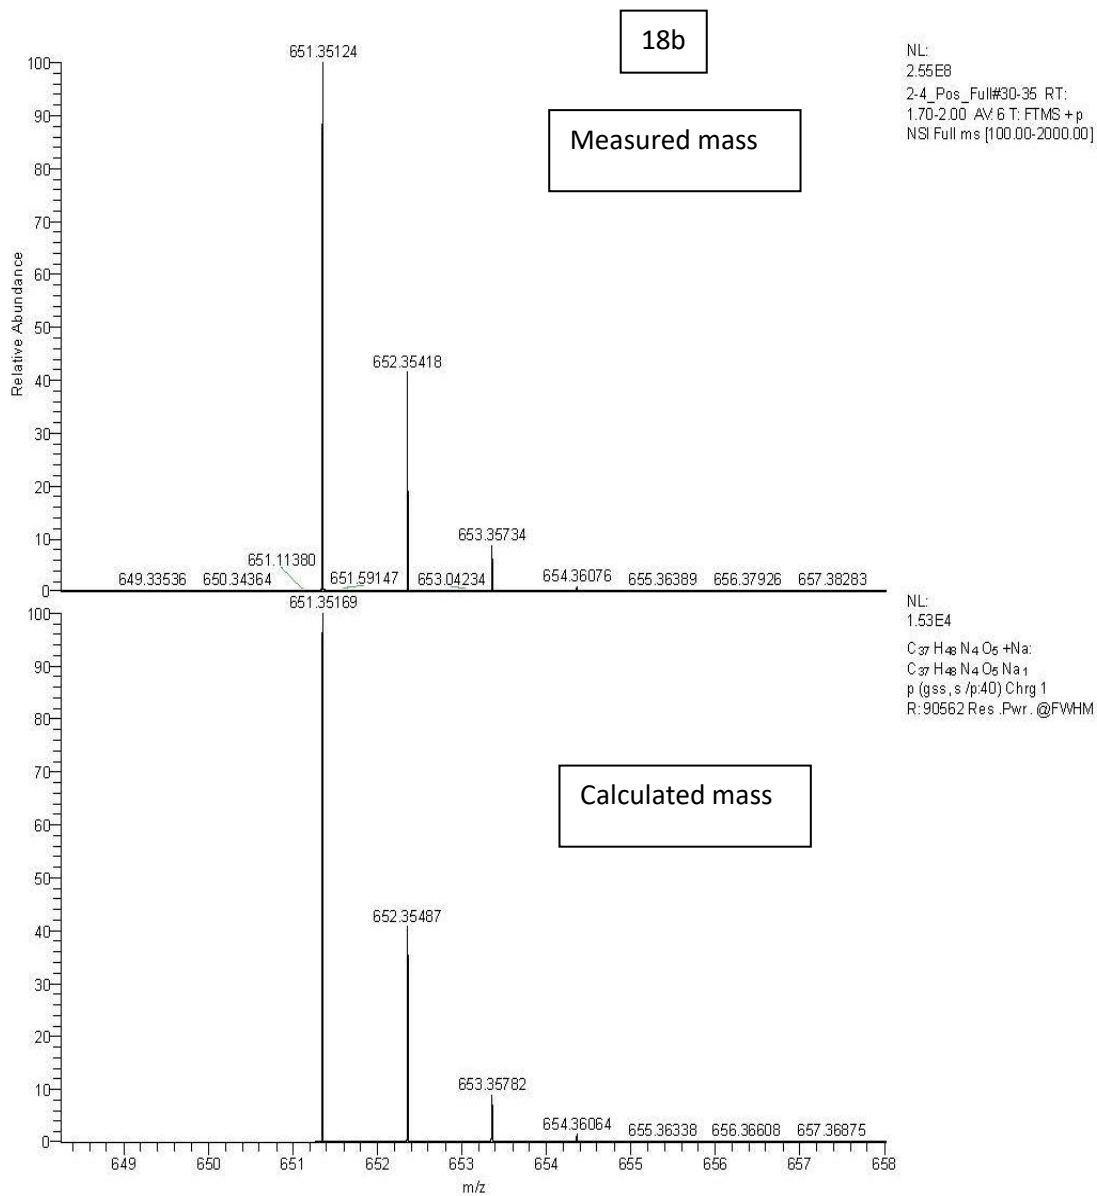

HRMS of (S)-N-(2-(1H-indol-3-yl) ethyl)-2,5-diamino-N-(naphthalen-2-ylmethyl) pentanamide  
(TFA salt) (19a)

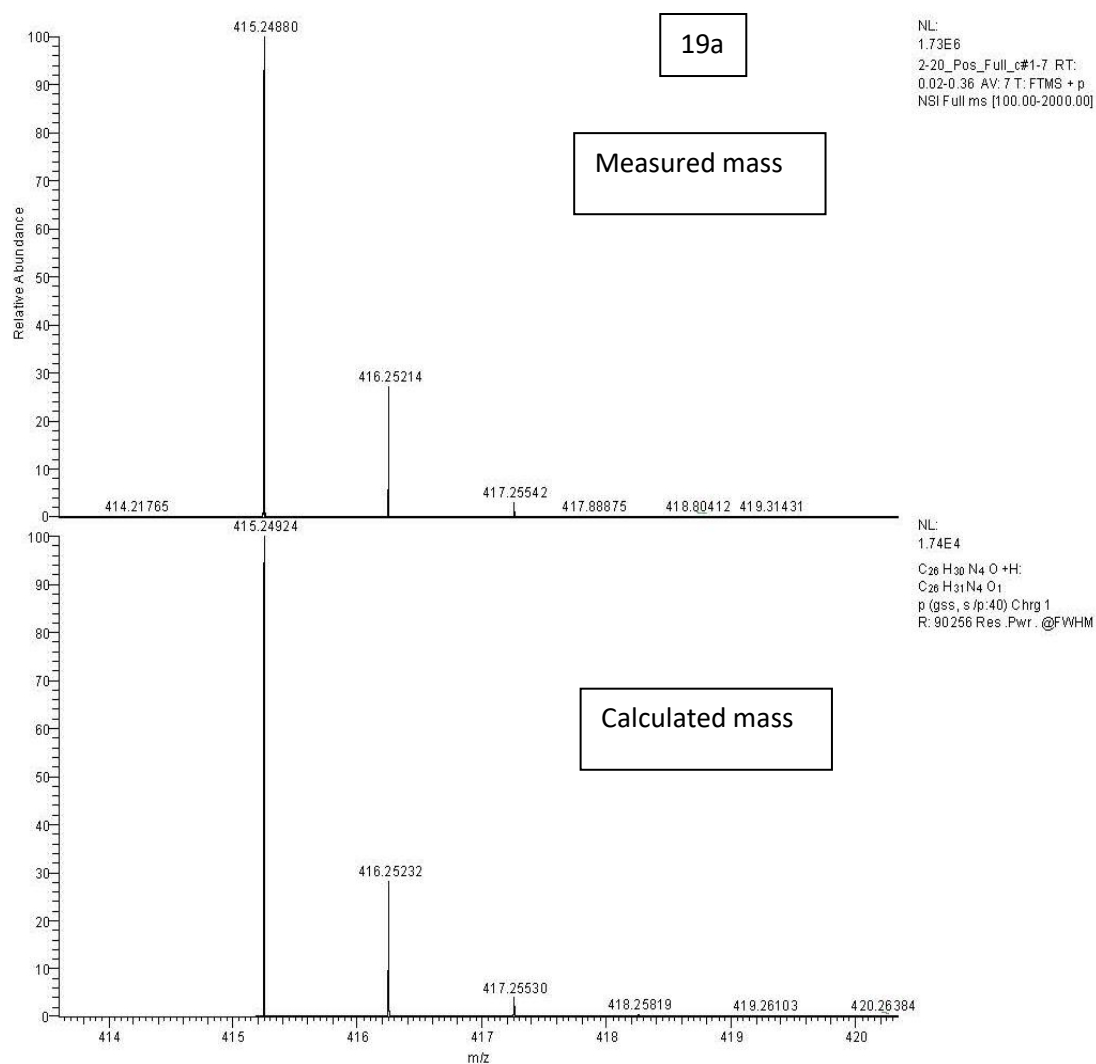



HRMS of (S)-N-(2-(1H-indol-3-yl) ethyl)-2,6-diamino-N-(naphthalen-2-ylmethyl) hexanamide (TFA salt) (19b)

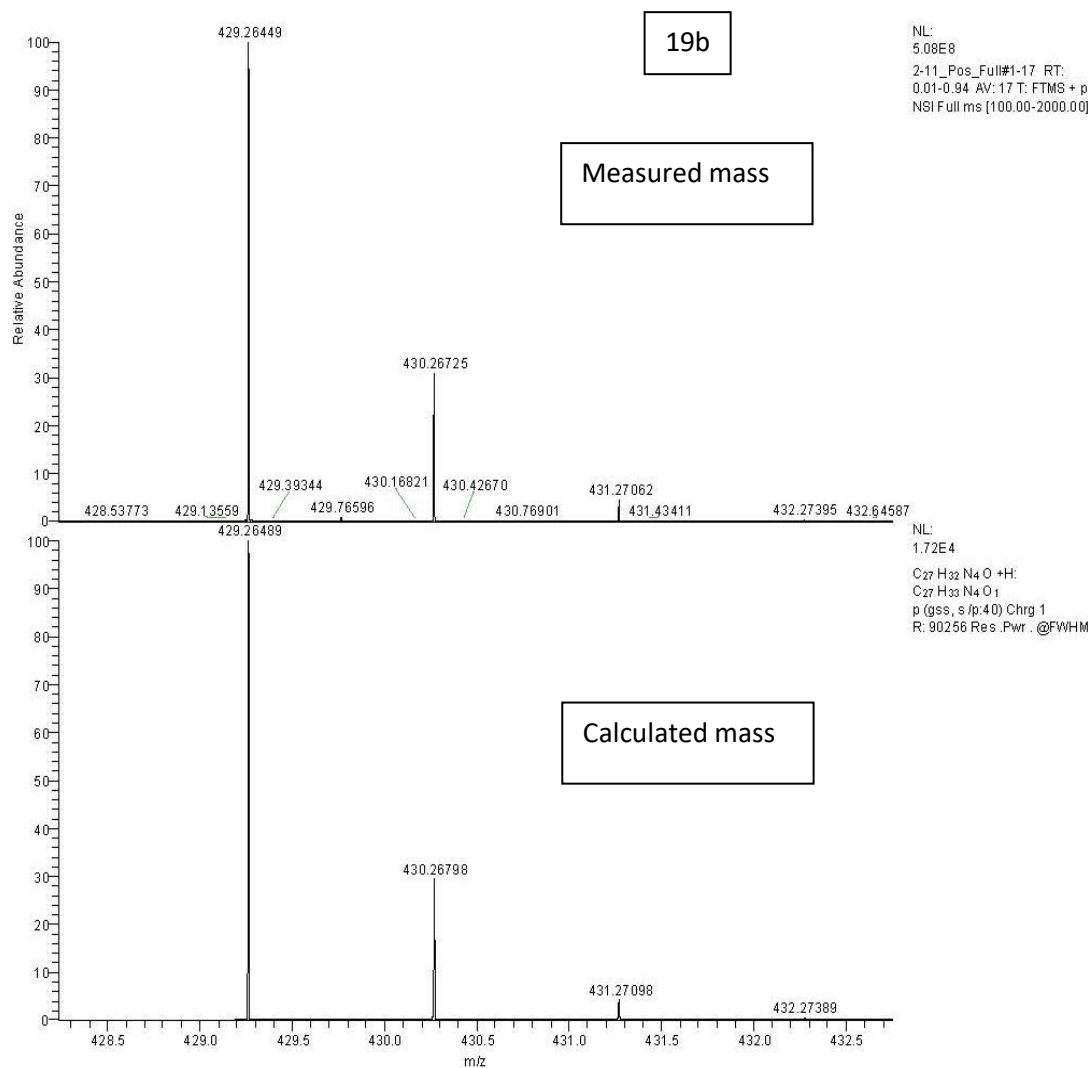

HRMS of *N*-(2-(1*H*-indol-3-yl) ethyl)-2,5-diguanidino-*N*-(naphthalen-2-ylmethyl) pentanamide  
(TFA salt) (20a)

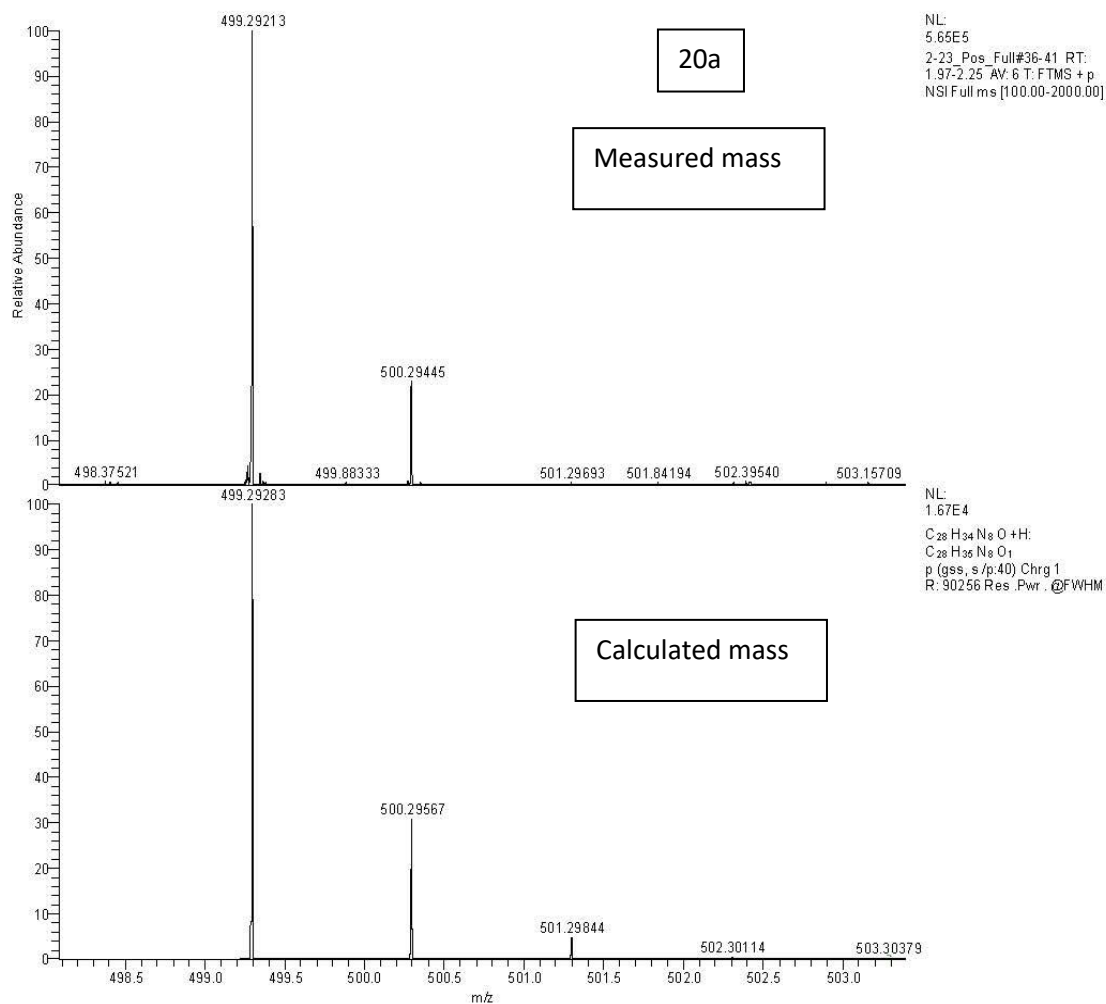

HRMS of (S)-N-(2-(1H-indol-3-yl) ethyl)-2,6-diguanidino-N-(naphthalen-2-ylmethyl) hexanamide  
(TFA salt) (20b)

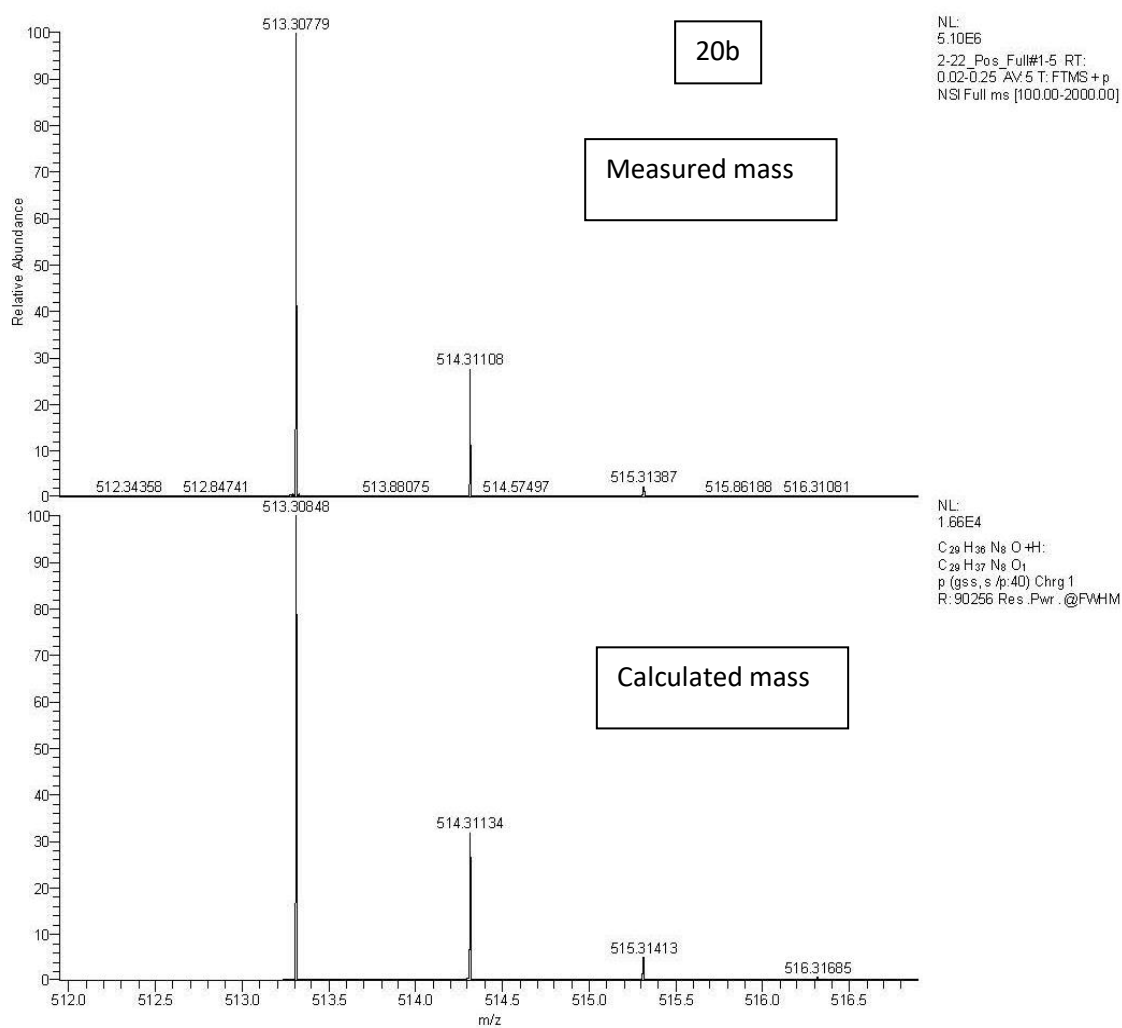

HRMS of *Tert-butyl(S)-(1-((2-(1H-indol-3-yl) ethyl) (naphthalen-2-ylmethyl) amino)-1-oxo-5-(3-((2,2,4,6,7-pentamethyl-2,3-dihydrobenzofuran-5-yl) sulfonyl)guanidino) pentan-2-yl) carbamate* (21)

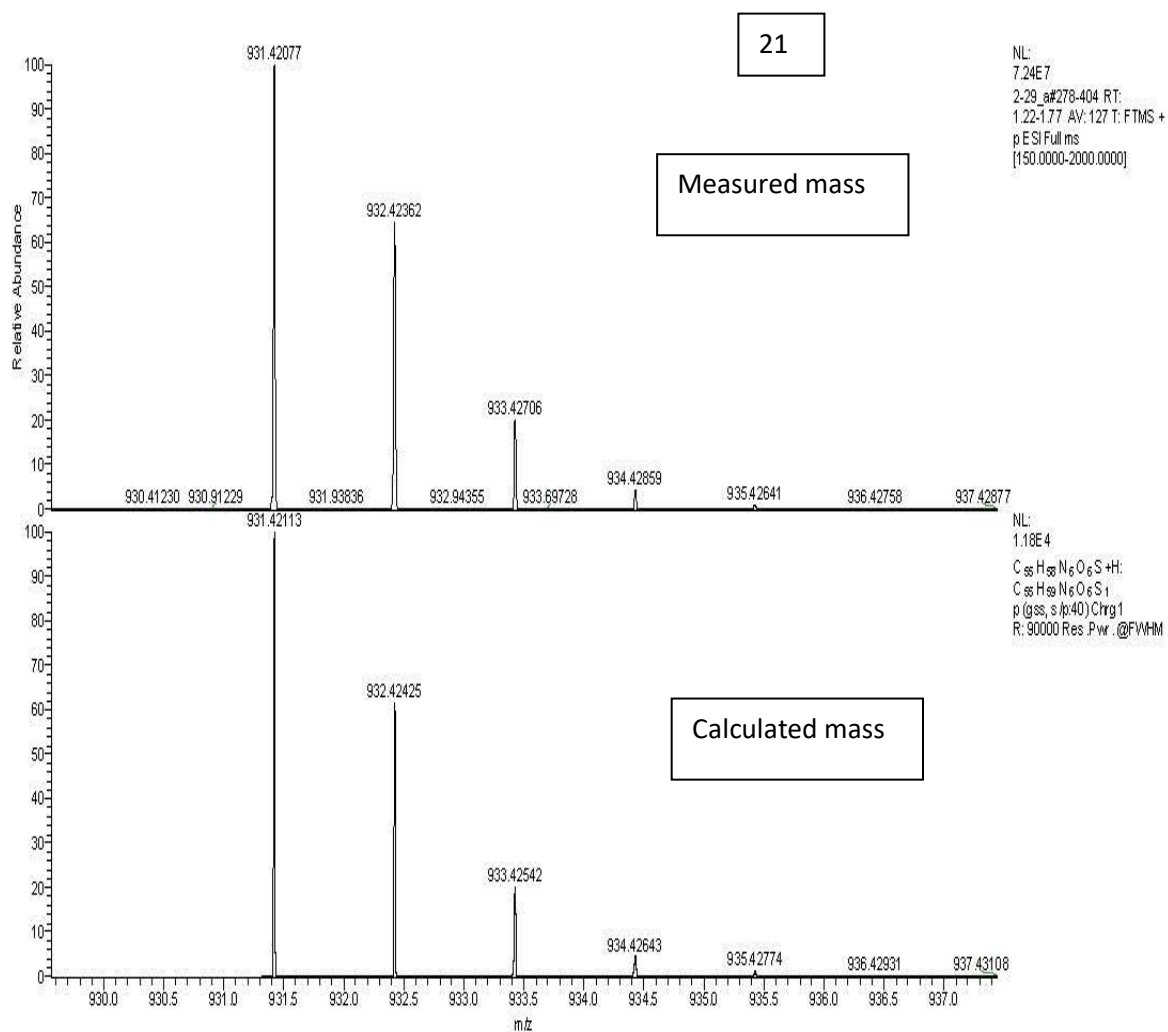

HRMS of (S)-N-(2-(1H-indol-3-yl) ethyl)-2-amino-N-(naphthalen-2-ylmethyl)-5-(3-((2,2,4,6,7-pentamethyl-2,3-dihydrobenzofuran-5-yl) sulfonyl) guanidino)pentanamide (22)

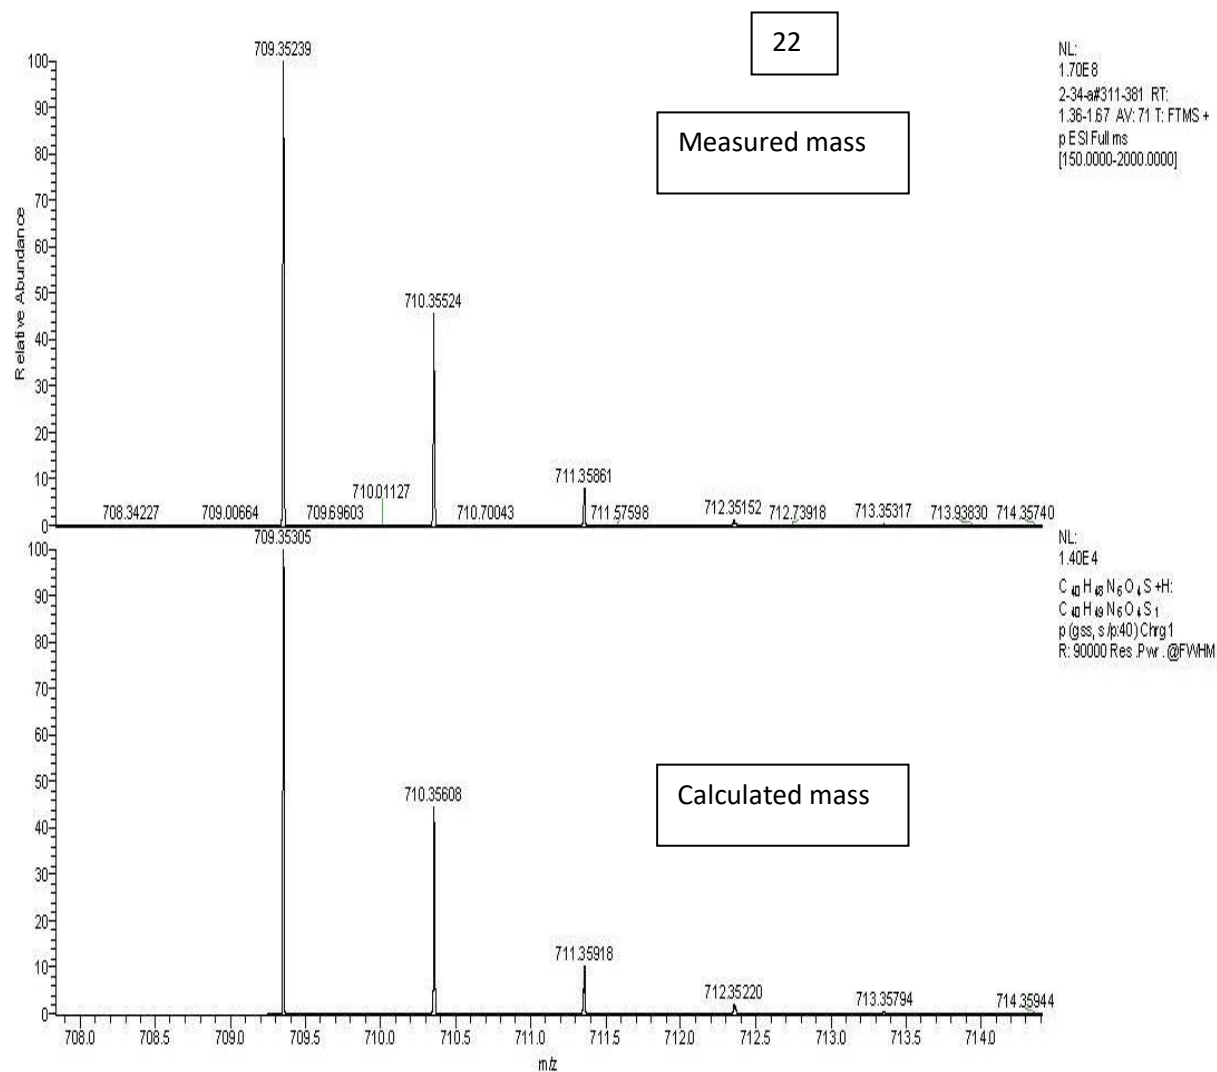

HRMS of (S)-N-(2-(1H-indol-3-yl) ethyl)-2-amino-5-guanidino-N-(naphthalen-2-ylmethyl)  
pentanamide (TFA salt) (23)

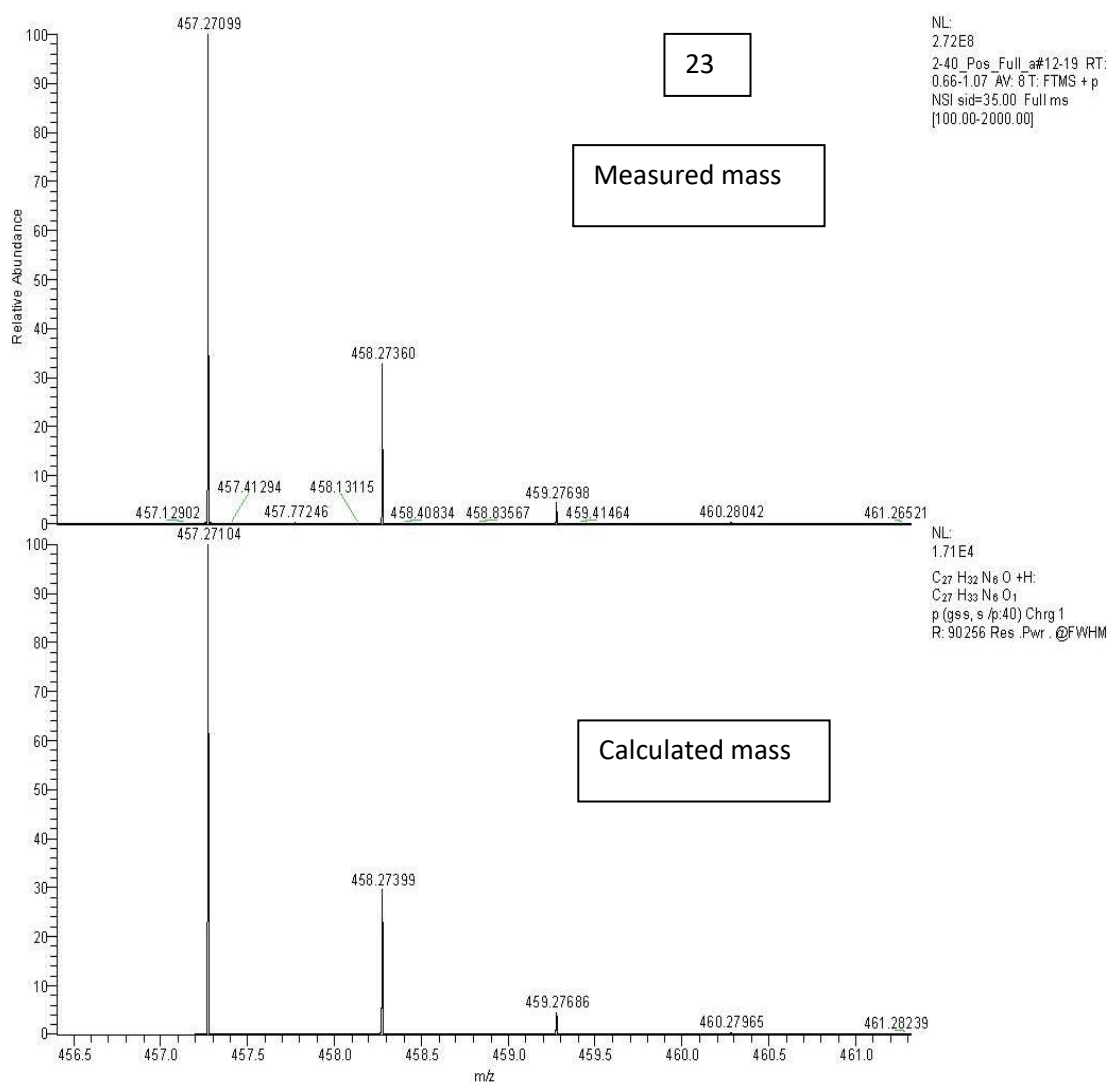

HRMS of *N*-benzyl-2-(1*H*-indol-3-yl) ethan-1-amine (24)

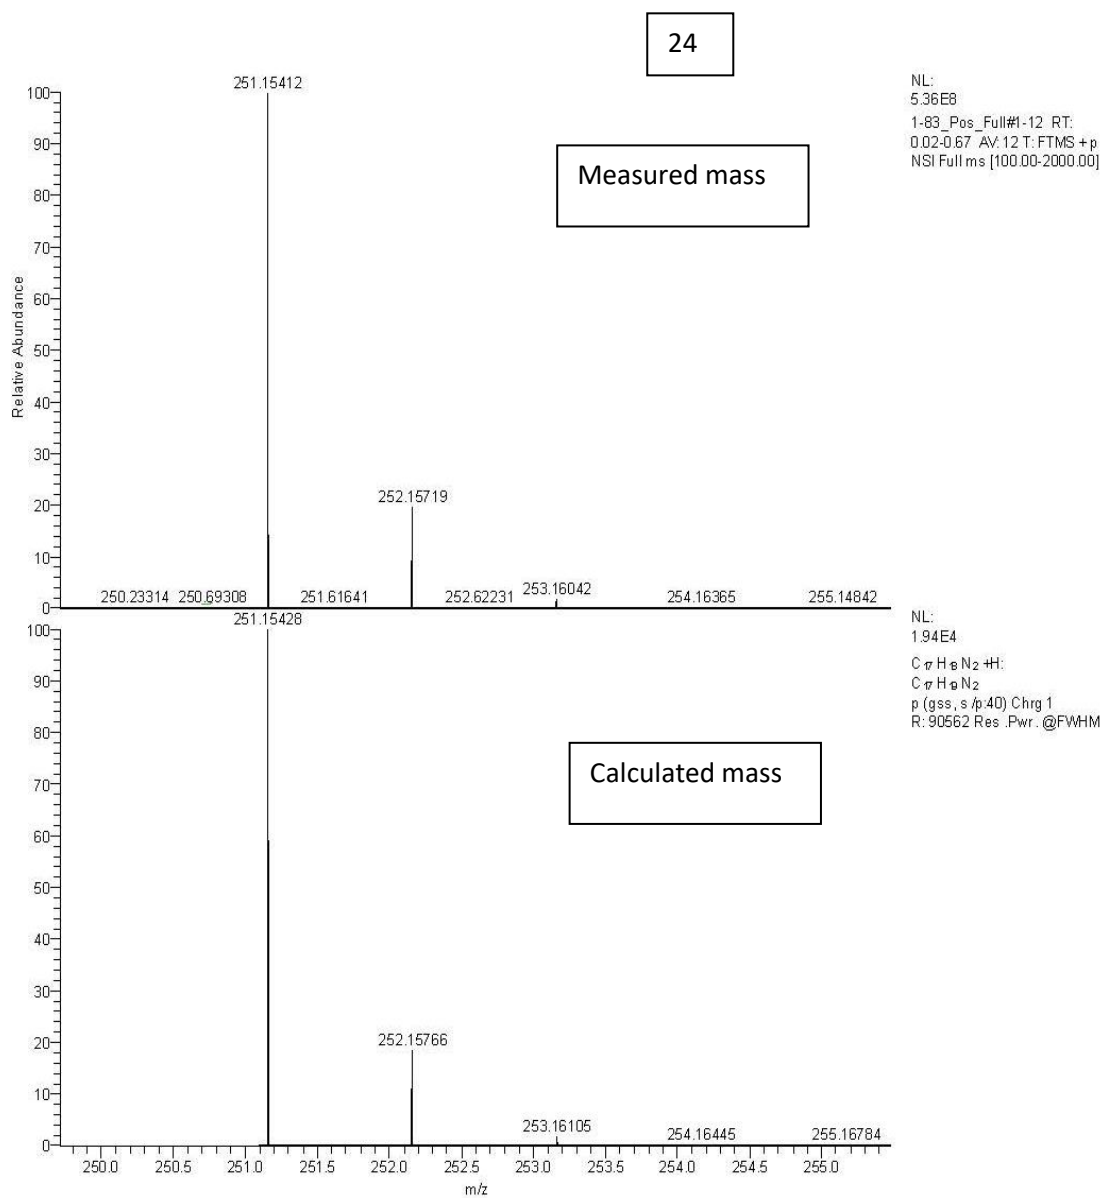

HRMS of Tert-butyl(2-((2-(1H-indol-3-yl)ethyl)(benzyl)amino)-2-oxoethyl)carbamate (25)

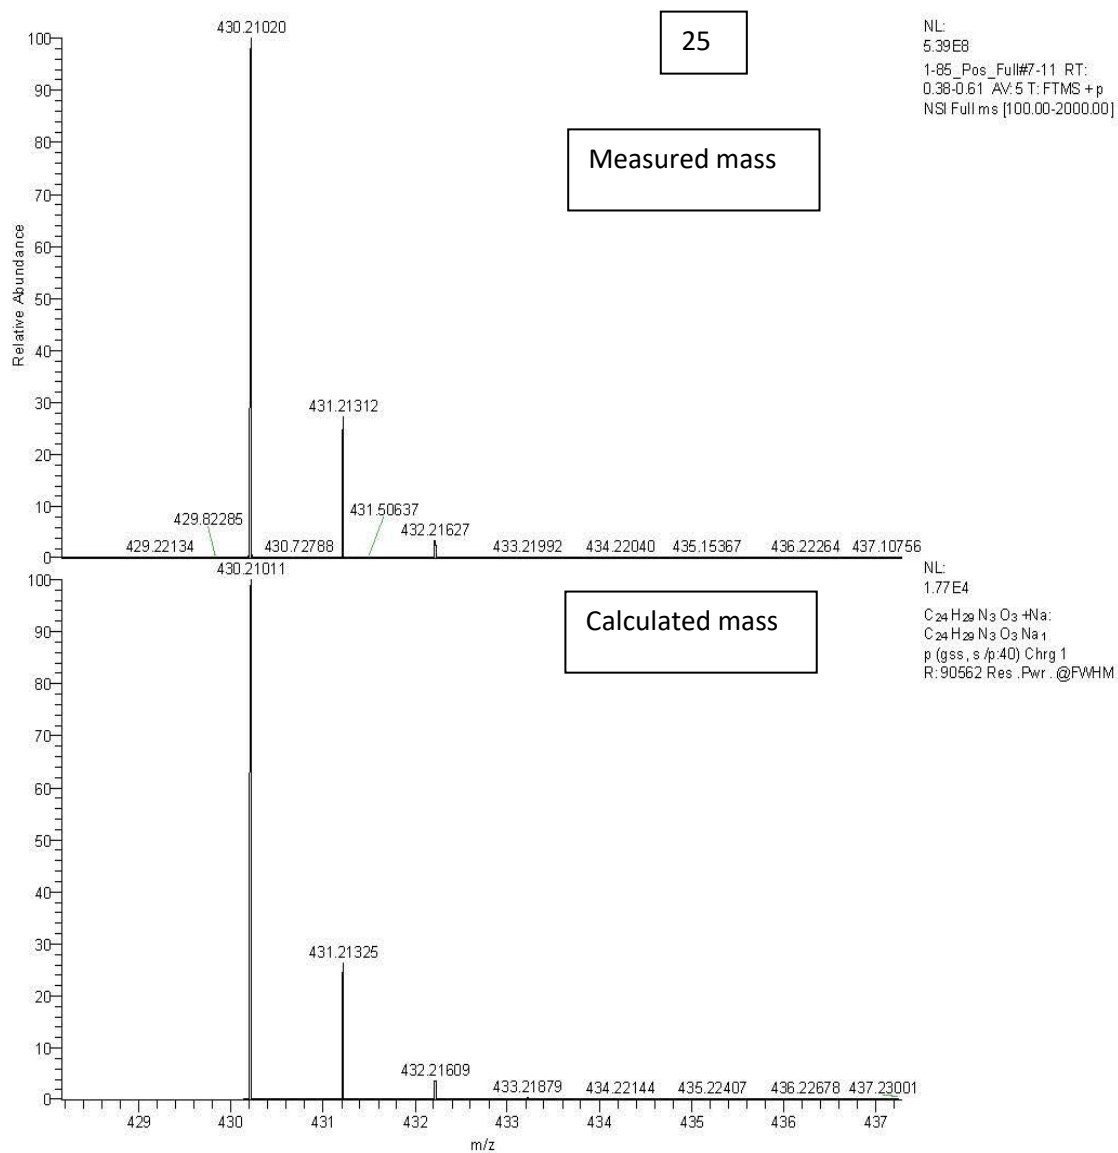



HRMS of *N*-(2-(1*H*-indol-3-yl) ethyl)-2-amino-*N*-benzylacetamide (26) (TFA salt)

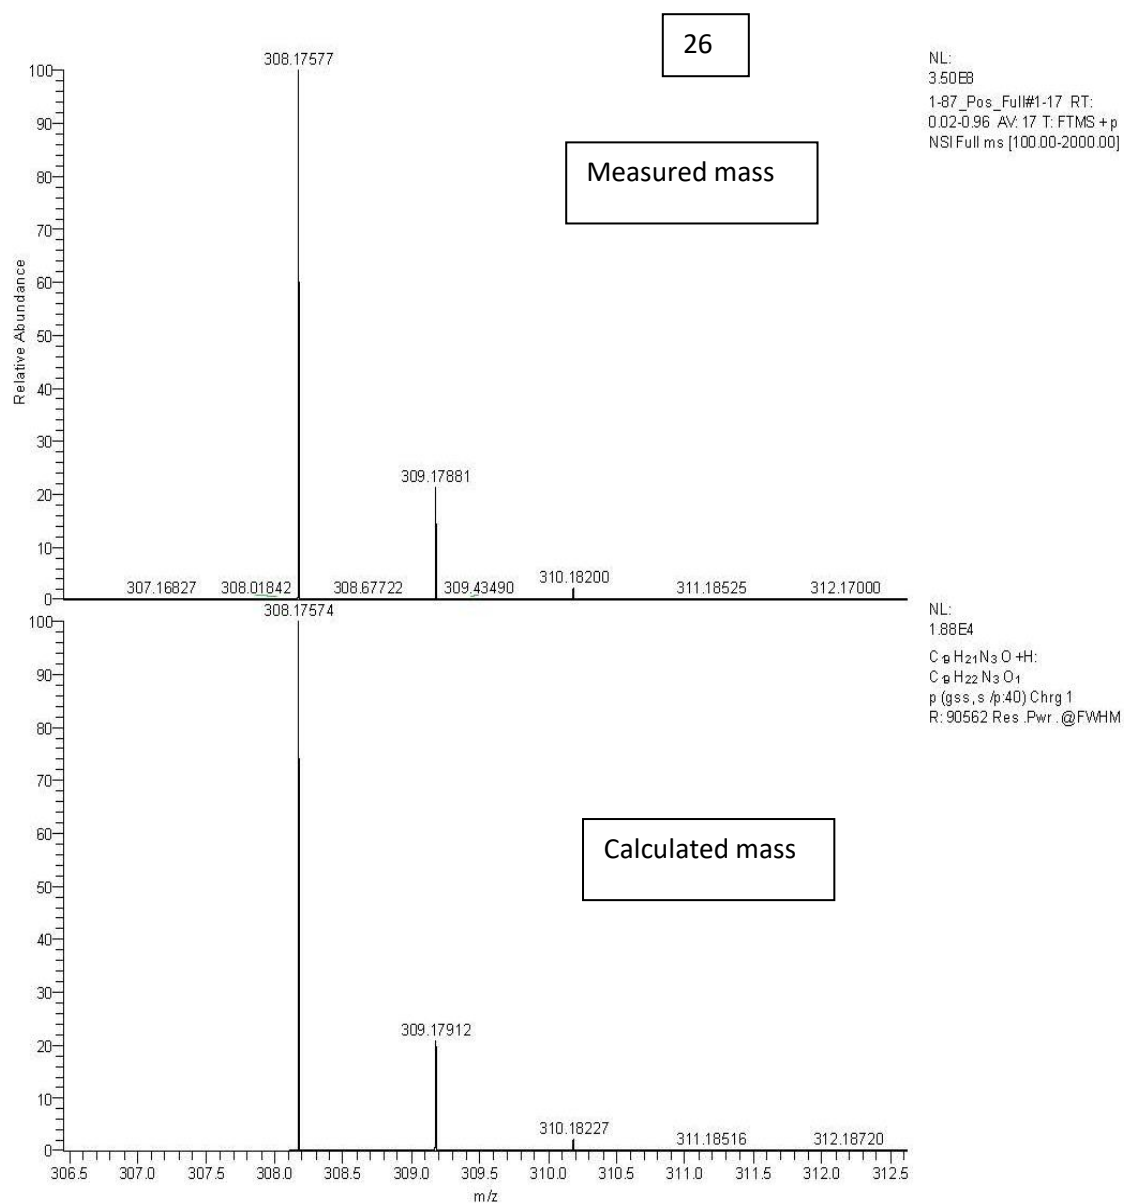

Supplement: s1 [file s1]
